# Supplementary material for: Amphibian skin bacteria display antifungal activity and induce plant defense mechanisms against Botrytis cinerea
Source: Front Plant Sci. 2024 Apr 9;15:1392637. doi: 10.3389/fpls.2024.1392637 (PMC11035788; doi:10.3389/fpls.2024.1392637)
Supplement: Supplementary Data Sheet 1 — List of differentially expressed genes for each condition, associated to . [file Table_1.xlsx]

## Sheet: AtMSCtrlvsAtC32I
baseMean	log2FoldChange	lfcSE	stat	pvalue	padj	AtC32I_1	AtC32I_2	AtC32IBc_1	AtC32IBc_2	AtC32I_1.1	AtC32I_2.1	AtC32IBc_1.1	AtC32IBc_2.1	Certeza	DE
AT3G22231	4315.99	4.21932	0.245285	17.2017	2.57834e-66	4.38524e-62	10684	6576	406	459	9663.79	6720.53	440.524	439.125	100	DOWN_AtMSCtrl_UP_AtC32I
AT3G22235	3658.1	3.91888	0.230496	17.0019	7.9485e-65	6.7594e-61	8281	6101	381	516	7490.26	6235.09	413.398	493.657	100	DOWN_AtMSCtrl_UP_AtC32I
AT3G05900	3197.83	-3.72806	0.225184	-16.5556	1.45938e-61	8.2737e-58	522	416	5929	5708	472.155	425.143	6433.17	5460.84	100	UP_AtMSCtrl_DOWN_AtC32I
AT2G14560	1847.81	3.63079	0.237414	15.2931	8.50564e-53	3.6166e-49	4177	2995	263	279	3778.14	3060.83	285.364	266.919	100	DOWN_AtMSCtrl_UP_AtC32I
AT1G20970	1790.25	-3.77992	0.248603	-15.2046	3.29428e-52	1.12058e-48	236	267	3405	3115	213.465	272.868	3694.54	2980.12	100	UP_AtMSCtrl_DOWN_AtC32I
AT5G40450	12760.8	-3.71252	0.250523	-14.8191	1.10287e-49	3.12627e-46	1587	2136	23745	22641	1435.46	2182.95	25764.1	21660.6	100	UP_AtMSCtrl_DOWN_AtC32I
AT4G33150	4219.79	-2.92008	0.214011	-13.6445	2.17678e-42	5.28896e-39	1092	961	6464	8253	987.726	982.122	7013.66	7895.64	100	UP_AtMSCtrl_DOWN_AtC32I
AT3G45300	5316.68	-2.89262	0.215999	-13.3918	6.74891e-41	1.43482e-37	1279	1338	8474	9980	1156.87	1367.41	9194.58	9547.85	100	UP_AtMSCtrl_DOWN_AtC32I
AT4G36520	1041.25	-3.68954	0.280381	-13.159	1.51042e-39	2.85436e-36	144	166	2110	1647	130.25	169.648	2289.42	1575.68	100	UP_AtMSCtrl_DOWN_AtC32I
AT1G03080	936.57	-3.52988	0.268635	-13.14	1.94103e-39	3.3013e-36	134	174	1657	1724	121.204	177.824	1797.9	1649.35	100	UP_AtMSCtrl_DOWN_AtC32I
AT3G19710	1095.39	3.81756	0.301555	12.6595	9.90682e-37	1.53177e-33	2866	1467	120	167	2592.33	1499.24	130.204	159.769	100	DOWN_AtMSCtrl_UP_AtC32I
AT5G40340	1725.07	-3.22103	0.258032	-12.4831	9.23381e-36	1.20807e-32	319	372	3292	2780	288.539	380.176	3571.93	2659.62	100	UP_AtMSCtrl_DOWN_AtC32I
AT5G56870	6084.15	-2.66628	0.213515	-12.4875	8.7324e-36	1.20807e-32	1695	1741	9488	11215	1533.15	1779.27	10294.8	10729.4	100	UP_AtMSCtrl_DOWN_AtC32I
AT2G15880	1939.85	-2.73487	0.221075	-12.3708	3.76115e-35	4.56926e-32	579	479	3060	3581	523.712	489.528	3320.21	3425.94	100	UP_AtMSCtrl_DOWN_AtC32I
AT1G04300	2705.13	-2.79466	0.22815	-12.2492	1.69573e-34	1.92274e-31	833	596	4570	4703	753.458	609.099	4958.61	4499.35	100	UP_AtMSCtrl_DOWN_AtC32I
AT1G65660	1224.15	-2.84327	0.233414	-12.1812	3.91285e-34	4.15936e-31	331	293	2082	2131	299.393	299.44	2259.04	2038.73	100	UP_AtMSCtrl_DOWN_AtC32I
AT1G15940	386.903	-3.78662	0.31617	-11.9765	4.71617e-33	4.71839e-30	46	62	663	756	41.6075	63.3627	719.378	723.264	100	UP_AtMSCtrl_DOWN_AtC32I
AT1G35115	421.127	-3.61601	0.307129	-11.7736	5.34049e-32	5.04617e-29	78	55	807	713	70.5519	56.2088	875.623	682.126	100	UP_AtMSCtrl_DOWN_AtC32I
AT1G67230	1195.25	-2.87633	0.244495	-11.7644	5.95691e-32	5.06575e-29	277	316	1960	2175	250.55	322.945	2126.67	2080.82	100	UP_AtMSCtrl_DOWN_AtC32I
AT5G16780	1302.42	-2.76372	0.234859	-11.7676	5.73617e-32	5.06575e-29	382	316	2242	2204	345.523	322.945	2432.65	2108.56	100	UP_AtMSCtrl_DOWN_AtC32I
AT5G11740	5557.7	2.52486	0.216602	11.6567	2.12187e-31	1.71851e-28	11325	8509	1574	1655	10243.6	8696.02	1707.84	1583.34	100	DOWN_AtMSCtrl_UP_AtC32I
AT5G65770	534.932	-3.25616	0.285197	-11.4172	3.43047e-30	2.65207e-27	99	111	987	905	89.5466	113.44	1070.93	865.812	100	UP_AtMSCtrl_DOWN_AtC32I
AT4G19190	640.541	-2.96829	0.260814	-11.3809	5.20843e-30	3.85152e-27	166	137	1117	1108	150.149	140.011	1211.98	1060.02	100	UP_AtMSCtrl_DOWN_AtC32I
AT2G32240	1440.76	-2.59703	0.228676	-11.3568	6.86151e-30	4.86252e-27	426	423	2313	2546	385.322	432.297	2509.69	2435.76	100	UP_AtMSCtrl_DOWN_AtC32I
AT4G30650	858.088	2.84157	0.252748	11.2427	2.51659e-29	1.71208e-26	1796	1358	179	236	1624.5	1387.85	194.221	225.781	100	DOWN_AtMSCtrl_UP_AtC32I
AT5G66030	1930.07	-2.49817	0.222948	-11.2052	3.84603e-29	2.51589e-26	634	575	2848	3626	573.46	587.638	3090.18	3468.99	100	UP_AtMSCtrl_DOWN_AtC32I
AT4G13770	3313.71	2.53785	0.226944	11.1827	4.95649e-29	3.12222e-26	6982	4885	882	1035	6315.3	4992.37	957.001	990.183	100	DOWN_AtMSCtrl_UP_AtC32I
AT1G03090	5380.34	-2.5673	0.230584	-11.1339	8.5812e-29	5.21247e-26	1491	1721	7882	10308	1348.63	1758.83	8552.24	9861.65	100	UP_AtMSCtrl_DOWN_AtC32I
AT3G06400	1739.86	-2.61169	0.238066	-10.9704	5.30086e-28	3.10886e-25	609	418	2886	2979	550.847	427.187	3131.41	2850.01	100	UP_AtMSCtrl_DOWN_AtC32I
AT2G43550	1205.15	2.55985	0.234358	10.9228	8.96771e-28	5.08409e-25	2330	1971	301	389	2107.51	2014.32	326.595	372.156	100	DOWN_AtMSCtrl_UP_AtC32I
AT1G78370	514.346	3.19412	0.292639	10.9149	9.78293e-28	5.36736e-25	1153	794	106	92	1042.9	811.451	115.014	88.0163	100	DOWN_AtMSCtrl_UP_AtC32I
AT4G26190	986.843	-2.69098	0.246776	-10.9045	1.09644e-27	5.8276e-25	307	246	1722	1620	277.685	251.407	1868.43	1549.85	100	UP_AtMSCtrl_DOWN_AtC32I
AT1G79280	893.628	-2.71956	0.251516	-10.8127	2.99751e-27	1.5449e-24	232	256	1502	1540	209.847	261.627	1629.72	1473.32	100	UP_AtMSCtrl_DOWN_AtC32I
AT3G58990	532.017	3.65953	0.338763	10.8026	3.34517e-27	1.67337e-24	1384	705	58	97	1251.84	720.495	62.932	92.7998	100	DOWN_AtMSCtrl_UP_AtC32I
AT4G31570	408.051	-3.15913	0.295466	-10.692	1.10918e-26	5.38996e-24	99	73	615	837	89.5466	74.6045	667.296	800.757	100	UP_AtMSCtrl_DOWN_AtC32I
AT1G76810	2754.28	-2.33478	0.218488	-10.6861	1.18247e-26	5.58651e-24	961	933	4447	4567	869.235	953.506	4825.15	4369.24	100	UP_AtMSCtrl_DOWN_AtC32I
AT5G41020	917.313	-2.83939	0.265978	-10.6753	1.32847e-26	6.10666e-24	223	243	1699	1438	201.706	248.341	1843.47	1375.73	100	UP_AtMSCtrl_DOWN_AtC32I
AT2G41090	3002.43	2.39826	0.225353	10.6423	1.89456e-26	8.47965e-24	6180	4408	877	1007	5589.88	4504.88	951.575	963.396	100	DOWN_AtMSCtrl_UP_AtC32I
AT5G25060	982.882	-2.50552	0.237972	-10.5287	6.37357e-26	2.77953e-23	312	300	1588	1693	282.207	306.594	1723.04	1619.69	100	UP_AtMSCtrl_DOWN_AtC32I
AT5G16730	808.429	-3.02206	0.288203	-10.4859	1.00319e-25	4.26558e-23	154	211	1499	1309	139.295	215.638	1626.47	1252.32	100	UP_AtMSCtrl_DOWN_AtC32I
AT1G09770	4118.51	-2.2756	0.219123	-10.385	2.90129e-25	1.16298e-22	1502	1430	6836	6519	1358.58	1461.43	7417.3	6236.72	100	UP_AtMSCtrl_DOWN_AtC32I
AT2G26560	2431.96	-2.29877	0.221428	-10.3815	3.00864e-25	1.16298e-22	861	846	3514	4465	778.784	864.594	3812.81	4271.66	100	UP_AtMSCtrl_DOWN_AtC32I
AT2G46020	1550.21	-2.36722	0.227985	-10.3833	2.95536e-25	1.16298e-22	566	484	2552	2535	511.953	494.638	2769.01	2425.23	100	UP_AtMSCtrl_DOWN_AtC32I
AT5G64310	467.233	3.0044	0.289245	10.387	2.84027e-25	1.16298e-22	890	838	111	91	805.015	856.418	120.439	87.0596	100	DOWN_AtMSCtrl_UP_AtC32I
AT5G13010	2109.56	-2.34099	0.225906	-10.3627	3.66658e-25	1.3858e-22	838	619	3322	3599	757.98	632.605	3604.49	3443.16	100	UP_AtMSCtrl_DOWN_AtC32I
AT1G61690	978.93	-2.70905	0.262886	-10.305	6.68739e-25	2.47259e-22	333	213	1704	1618	301.202	217.681	1848.9	1547.94	100	UP_AtMSCtrl_DOWN_AtC32I
AT3G54600	1242.38	2.45531	0.239342	10.2586	1.08296e-24	3.91892e-22	2533	1871	335	421	2291.13	1912.12	363.487	402.77	100	DOWN_AtMSCtrl_UP_AtC32I
AT1G75310	327.579	-3.35791	0.328659	-10.217	1.66405e-24	5.89628e-22	49	71	555	618	44.321	72.5605	602.194	591.24	100	UP_AtMSCtrl_DOWN_AtC32I
AT1G32080	2827.53	2.36156	0.231989	10.1796	2.44487e-24	8.31647e-22	5790	4140	778	1043	5237.12	4230.99	844.157	997.837	100	DOWN_AtMSCtrl_UP_AtC32I
AT4G02720	647.203	-2.6212	0.257471	-10.1806	2.42165e-24	8.31647e-22	199	178	1101	1079	179.998	181.912	1194.62	1032.28	100	UP_AtMSCtrl_DOWN_AtC32I
AT1G22930	3931.17	-2.31569	0.227689	-10.1704	2.68703e-24	8.96097e-22	1643	1119	6170	6690	1486.11	1143.59	6694.66	6400.32	100	UP_AtMSCtrl_DOWN_AtC32I
AT1G68790	484.521	-3.07316	0.303229	-10.1348	3.87263e-24	1.26665e-21	99	114	935	750	89.5466	116.506	1014.51	717.524	100	UP_AtMSCtrl_DOWN_AtC32I
AT3G02020	531.575	3.66857	0.362999	10.1063	5.18122e-24	1.66268e-21	1497	604	67	86	1354.05	617.275	72.6973	82.2761	100	DOWN_AtMSCtrl_UP_AtC32I
AT1G16410	786.722	3.74945	0.372457	10.0668	7.74401e-24	2.37898e-21	2324	809	111	102	2102.08	826.781	120.439	97.5833	100	DOWN_AtMSCtrl_UP_AtC32I
AT5G38980	3197.78	2.32549	0.23101	10.0666	7.75868e-24	2.37898e-21	6679	4523	960	1135	6041.23	4622.41	1041.63	1085.85	100	DOWN_AtMSCtrl_UP_AtC32I
AT5G50915	333.657	3.1942	0.317335	10.0657	7.83296e-24	2.37898e-21	572	671	63	66	517.38	685.748	68.3572	63.1421	100	DOWN_AtMSCtrl_UP_AtC32I
AT3G11450	3017.5	-2.3859	0.237603	-10.0416	1.00076e-23	2.98613e-21	1145	883	5334	4541	1035.67	902.407	5787.57	4344.37	100	UP_AtMSCtrl_DOWN_AtC32I
AT1G08630	1054.25	-3.32775	0.33252	-10.0076	1.41073e-23	4.13095e-21	126	263	1713	2065	113.968	268.78	1858.66	1975.58	100	UP_AtMSCtrl_DOWN_AtC32I
AT1G24147	374.524	3.31268	0.331066	10.0061	1.43301e-23	4.13095e-21	886	548	51	85	801.397	560.044	55.3368	81.3194	100	DOWN_AtMSCtrl_UP_AtC32I
AT1G19835	1368.74	-2.33243	0.234656	-9.93978	2.79434e-23	7.92103e-21	538	411	2237	2238	486.627	420.033	2427.22	2141.09	100	UP_AtMSCtrl_DOWN_AtC32I
AT5G05210	448.69	-2.87833	0.290545	-9.90669	3.89345e-23	1.08557e-20	99	123	738	814	89.5466	125.703	800.756	778.753	100	UP_AtMSCtrl_DOWN_AtC32I
AT4G36980	1746.65	-2.23819	0.227972	-9.81782	9.43632e-23	2.5886e-20	728	551	2549	3135	658.484	563.11	2765.75	2999.25	100	UP_AtMSCtrl_DOWN_AtC32I
AT2G46650	444.114	3.08948	0.315256	9.79989	1.12713e-22	3.04289e-20	1026	647	102	80	928.028	661.22	110.674	76.5359	100	DOWN_AtMSCtrl_UP_AtC32I
AT2G40750	343.444	3.13267	0.320056	9.78788	1.26933e-22	3.37325e-20	796	502	68	70	719.991	513.033	73.7824	66.9689	100	DOWN_AtMSCtrl_UP_AtC32I
AT1G24706	741.112	-2.51952	0.258699	-9.73919	2.05191e-22	5.36907e-20	275	187	1147	1338	248.741	191.11	1244.53	1280.06	100	UP_AtMSCtrl_DOWN_AtC32I
AT3G55610	3336.7	-2.0549	0.212625	-9.6644	4.27102e-22	1.10063e-19	1486	1218	4904	5683	1344.1	1244.77	5321.01	5436.92	100	UP_AtMSCtrl_DOWN_AtC32I
AT1G19960	385.067	2.83468	0.295008	9.60881	7.33893e-22	1.86299e-19	761	648	99	86	688.333	662.242	107.418	82.2761	100	DOWN_AtMSCtrl_UP_AtC32I
AT1G60200	1856.57	-2.08589	0.218792	-9.53366	1.51835e-21	3.79765e-19	780	695	2762	3150	705.519	710.275	2996.87	3013.6	100	UP_AtMSCtrl_DOWN_AtC32I
AT3G52140	3598.76	-2.09579	0.220598	-9.50049	2.08904e-21	5.14932e-19	1644	1215	5586	5859	1487.02	1241.7	6061	5605.3	100	UP_AtMSCtrl_DOWN_AtC32I
AT1G14690	743.112	-2.31998	0.244696	-9.48105	2.51745e-21	6.11669e-19	276	241	1145	1290	249.645	246.297	1242.36	1234.14	100	UP_AtMSCtrl_DOWN_AtC32I
AT5G20610	883.58	-2.56809	0.27103	-9.47531	2.65966e-21	6.37119e-19	326	210	1571	1380	294.871	214.616	1704.59	1320.24	100	UP_AtMSCtrl_DOWN_AtC32I
AT2G33435	181.357	-3.58499	0.37862	-9.46859	2.83656e-21	6.64586e-19	29	29	327	329	26.2308	29.6374	354.806	314.754	100	UP_AtMSCtrl_DOWN_AtC32I
AT4G38540	2457.66	-2.40474	0.254054	-9.46549	2.92181e-21	6.64586e-19	682	925	3859	4266	616.876	945.33	4187.15	4081.28	100	UP_AtMSCtrl_DOWN_AtC32I
AT5G17900	943.649	-2.28454	0.241363	-9.46518	2.93062e-21	6.64586e-19	367	304	1541	1526	331.956	310.682	1672.04	1459.92	100	UP_AtMSCtrl_DOWN_AtC32I
AT5G55860	435.571	-2.94265	0.310842	-9.46671	2.88806e-21	6.64586e-19	112	97	862	634	101.305	99.1319	935.3	606.547	100	UP_AtMSCtrl_DOWN_AtC32I
AT1G32750	624.477	-2.5073	0.266422	-9.41102	4.91334e-21	1.09955e-18	233	159	1020	1064	210.751	162.495	1106.74	1017.93	100	UP_AtMSCtrl_DOWN_AtC32I
AT1G19150	1996.68	2.1155	0.224892	9.40671	5.11893e-21	1.13069e-18	3867	2927	704	767	3497.74	2991.33	763.864	733.788	100	DOWN_AtMSCtrl_UP_AtC32I
AT2G44200	335.886	-2.94502	0.31365	-9.38951	6.02828e-21	1.31447e-18	76	84	617	543	68.7428	85.8462	669.466	519.487	100	UP_AtMSCtrl_DOWN_AtC32I
AT4G38470	3467.75	-2.03366	0.217279	-9.3597	7.99607e-21	1.72148e-18	1396	1429	4983	6001	1262.7	1460.41	5406.73	5741.15	100	UP_AtMSCtrl_DOWN_AtC32I
AT1G76720	336.662	-3.12821	0.335315	-9.32918	1.06689e-20	2.26821e-18	98	48	579	607	88.6421	49.055	628.235	580.716	100	UP_AtMSCtrl_DOWN_AtC32I
AT5G45680	888.014	2.24975	0.241368	9.32081	1.15454e-20	2.42425e-18	1644	1417	267	342	1487.02	1448.14	289.704	327.191	100	DOWN_AtMSCtrl_UP_AtC32I
AT4G11420	2506.27	-2.24082	0.240892	-9.30218	1.37591e-20	2.85383e-18	1119	722	4030	4079	1012.15	737.869	4372.69	3902.37	100	UP_AtMSCtrl_DOWN_AtC32I
AT5G16880	2765.11	-2.00362	0.215524	-9.29651	1.45137e-20	2.97408e-18	1279	1028	4038	4674	1156.87	1050.59	4381.37	4471.61	100	UP_AtMSCtrl_DOWN_AtC32I
AT3G05880	1357.55	2.27574	0.244954	9.29045	1.53642e-20	3.11088e-18	2519	2175	365	557	2278.46	2222.8	396.038	532.881	100	DOWN_AtMSCtrl_UP_AtC32I
AT3G49601	1449.86	-2.8708	0.309166	-9.28564	1.60739e-20	3.21629e-18	269	445	2775	2185	243.313	454.781	3010.97	2090.39	100	UP_AtMSCtrl_DOWN_AtC32I
AT5G07440	2548.68	-2.11931	0.228512	-9.27439	1.78639e-20	3.4923e-18	933	1041	3936	4198	843.909	1063.88	4270.7	4016.22	100	UP_AtMSCtrl_DOWN_AtC32I
AT5G46070	549.792	-2.54804	0.274735	-9.27451	1.78437e-20	3.4923e-18	182	153	978	854	164.621	156.363	1061.16	817.021	100	UP_AtMSCtrl_DOWN_AtC32I
AT2G31970	351.104	-2.75354	0.297064	-9.26918	1.87591e-20	3.62562e-18	111	79	549	656	100.401	80.7363	595.684	627.594	100	UP_AtMSCtrl_DOWN_AtC32I
AT5G63160	4361.36	-2.02729	0.218992	-9.25736	2.09541e-20	4.00435e-18	1757	1808	6057	7773	1589.23	1847.74	6572.05	7436.42	100	UP_AtMSCtrl_DOWN_AtC32I
AT5G08760	294.224	3.1737	0.344794	9.20463	3.42857e-20	6.47924e-18	625	484	39	78	565.319	494.638	42.3164	74.6225	100	DOWN_AtMSCtrl_UP_AtC32I
AT5G55300	907.287	-2.22825	0.242404	-9.19232	3.84453e-20	7.18546e-18	371	296	1457	1474	335.574	302.506	1580.9	1410.17	100	UP_AtMSCtrl_DOWN_AtC32I
AT5G61160	2373.86	-2.52864	0.275661	-9.17298	4.60131e-20	8.50642e-18	565	873	3880	4058	511.049	892.187	4209.93	3882.28	100	UP_AtMSCtrl_DOWN_AtC32I
AT5G19240	1164.85	2.32232	0.253975	9.14386	6.02611e-20	1.10207e-17	2469	1614	379	382	2233.24	1649.47	411.228	365.459	100	DOWN_AtMSCtrl_UP_AtC32I
AT2G30766	171.604	3.52188	0.385325	9.14002	6.2441e-20	1.12978e-17	332	324	26	28	300.298	331.121	28.2109	26.7876	100	DOWN_AtMSCtrl_UP_AtC32I
AT1G32490	674.883	-2.38153	0.26083	-9.13057	6.81412e-20	1.21994e-17	261	194	1131	1085	236.077	198.264	1227.17	1038.02	100	UP_AtMSCtrl_DOWN_AtC32I
AT1G14880	762.889	2.45931	0.269945	9.11041	8.20705e-20	1.45402e-17	1194	1470	205	258	1079.99	1502.31	222.432	246.828	100	DOWN_AtMSCtrl_UP_AtC32I
AT1G54100	3876.68	-1.92186	0.211166	-9.10118	8.93564e-20	1.55489e-17	1825	1553	5458	6634	1650.73	1587.13	5922.12	6346.74	100	UP_AtMSCtrl_DOWN_AtC32I
AT5G41790	1953.16	-2.76924	0.304282	-9.10089	8.95926e-20	1.55489e-17	369	652	3473	3182	333.765	666.33	3768.33	3044.22	100	UP_AtMSCtrl_DOWN_AtC32I
AT2G43100	241.729	3.43905	0.38072	9.03302	1.66993e-19	2.86891e-17	617	320	41	39	558.083	327.033	44.4864	37.3113	100	DOWN_AtMSCtrl_UP_AtC32I
AT1G44910	513.818	-2.36699	0.262332	-9.02289	1.83191e-19	3.11571e-17	187	161	794	899	169.144	164.539	861.518	860.072	100	UP_AtMSCtrl_DOWN_AtC32I
AT1G20920	1277.42	-2.30329	0.256107	-8.99347	2.3955e-19	4.03392e-17	559	347	2078	2085	505.622	354.627	2254.7	1994.72	100	UP_AtMSCtrl_DOWN_AtC32I
AT4G27500	3381.64	-2.11545	0.235418	-8.98594	2.56521e-19	4.27737e-17	1235	1389	5579	5160	1117.07	1419.53	6053.41	4936.57	100	UP_AtMSCtrl_DOWN_AtC32I
AT1G09570	3039.29	-1.95133	0.217567	-8.96889	2.99529e-19	4.94601e-17	1402	1203	4762	4696	1268.12	1229.44	5166.93	4492.66	100	UP_AtMSCtrl_DOWN_AtC32I
AT5G58040	1275.59	-2.18363	0.244623	-8.92651	4.39656e-19	7.19006e-17	443	509	2033	2065	400.698	520.187	2205.88	1975.58	100	UP_AtMSCtrl_DOWN_AtC32I
AT2G28290	1566.02	-2.12049	0.237837	-8.91575	4.84533e-19	7.84852e-17	717	511	2511	2476	648.534	522.231	2724.52	2368.79	100	UP_AtMSCtrl_DOWN_AtC32I
AT5G61150	749.831	-2.24447	0.252347	-8.8944	5.87338e-19	9.42401e-17	274	269	1235	1188	247.836	274.912	1340.02	1136.56	100	UP_AtMSCtrl_DOWN_AtC32I
AT2G03150	502.844	-2.36855	0.266472	-8.88858	6.18949e-19	9.8384e-17	190	151	749	912	171.857	154.319	812.691	872.509	100	UP_AtMSCtrl_DOWN_AtC32I
AT1G79830	1909.13	-2.13698	0.240779	-8.87526	6.97683e-19	1.09872e-16	692	772	3155	2925	625.922	788.968	3423.28	2798.34	100	UP_AtMSCtrl_DOWN_AtC32I
AT1G65440	1608.27	-2.01945	0.227618	-8.87213	7.17614e-19	1.11974e-16	665	657	2510	2547	601.5	671.44	2723.44	2436.71	100	UP_AtMSCtrl_DOWN_AtC32I
AT3G01310	3516.03	-2.04778	0.231183	-8.85781	8.16041e-19	1.26175e-16	1726	1152	5369	5749	1561.19	1177.32	5825.55	5500.06	100	UP_AtMSCtrl_DOWN_AtC32I
AT3G58110	715.763	-2.2454	0.253889	-8.84399	9.23564e-19	1.41513e-16	299	223	1146	1172	270.449	227.901	1243.45	1121.25	100	UP_AtMSCtrl_DOWN_AtC32I
AT1G74250	468.962	-2.65737	0.300926	-8.83062	1.04093e-18	1.58073e-16	118	147	851	727	106.732	150.231	923.364	695.52	100	UP_AtMSCtrl_DOWN_AtC32I
AT3G53540	717.613	-2.18474	0.247482	-8.82789	1.06665e-18	1.60546e-16	274	264	1113	1197	247.836	269.802	1207.64	1145.17	100	UP_AtMSCtrl_DOWN_AtC32I
AT3G48520	147.177	3.80013	0.431119	8.81459	1.20128e-18	1.79223e-16	264	304	15	24	238.791	310.682	16.2755	22.9608	100	DOWN_AtMSCtrl_UP_AtC32I
AT4G25730	823.114	-2.26082	0.257067	-8.79467	1.43465e-18	2.12179e-16	303	288	1419	1238	274.067	294.33	1539.66	1184.39	100	UP_AtMSCtrl_DOWN_AtC32I
AT4G16680	239.402	-2.92225	0.33243	-8.79056	1.48811e-18	2.18188e-16	58	58	359	477	52.4616	59.2748	389.527	456.345	100	UP_AtMSCtrl_DOWN_AtC32I
AT4G24680	1107.93	-2.17371	0.247999	-8.765	1.86769e-18	2.71502e-16	391	441	1793	1758	353.664	450.693	1945.47	1681.88	100	UP_AtMSCtrl_DOWN_AtC32I
AT1G30260	427.996	2.49015	0.284631	8.74872	2.15787e-18	3.11026e-16	841	678	105	151	760.694	692.902	113.929	144.462	100	DOWN_AtMSCtrl_UP_AtC32I
AT3G57300	1504.98	-2.35158	0.269638	-8.72126	2.75125e-18	3.9322e-16	675	367	2245	2716	610.545	375.066	2435.9	2598.39	100	UP_AtMSCtrl_DOWN_AtC32I
AT1G44575	12002.9	1.78242	0.204826	8.70211	3.25767e-18	4.6172e-16	20183	18535	5128	5487	18255.7	18942.4	5564.06	5249.41	100	DOWN_AtMSCtrl_UP_AtC32I
AT3G02730	2670.2	2.16433	0.249342	8.68015	3.95232e-18	5.55546e-16	4441	4615	735	1202	4016.93	4716.43	797.5	1149.95	100	DOWN_AtMSCtrl_UP_AtC32I
AT5G67480	3407.52	-2.04815	0.236208	-8.67094	4.28574e-18	5.97475e-16	1684	1106	4744	6093	1523.2	1130.31	5147.4	5829.17	100	UP_AtMSCtrl_DOWN_AtC32I
AT1G76820	337.97	-2.64318	0.306389	-8.62689	6.30448e-18	8.71761e-16	120	76	525	623	108.541	77.6704	569.643	596.023	100	UP_AtMSCtrl_DOWN_AtC32I
AT1G24160	2586.57	-2.09782	0.243658	-8.60968	7.3265e-18	1.00491e-15	1274	789	3960	4276	1152.35	806.341	4296.74	4090.84	100	UP_AtMSCtrl_DOWN_AtC32I
AT2G22500	880.158	2.20135	0.256039	8.59774	8.13041e-18	1.10626e-15	1377	1611	292	326	1245.51	1646.41	316.83	311.884	100	DOWN_AtMSCtrl_UP_AtC32I
AT1G55330	901.537	2.15451	0.250768	8.59164	8.57361e-18	1.1573e-15	1441	1606	316	333	1303.4	1641.3	342.871	318.581	100	DOWN_AtMSCtrl_UP_AtC32I
AT4G37120	1470.77	-2.08717	0.243198	-8.58219	9.30824e-18	1.24657e-15	640	530	2498	2145	578.887	541.649	2710.42	2052.12	100	UP_AtMSCtrl_DOWN_AtC32I
AT1G14150	1945.73	2.06782	0.241602	8.55879	1.14056e-17	1.51552e-15	3137	3373	605	880	2837.45	3447.13	656.446	841.895	100	DOWN_AtMSCtrl_UP_AtC32I
AT4G31880	500.737	-2.34968	0.275884	-8.51693	1.63845e-17	2.16022e-15	168	173	693	964	151.958	176.802	751.929	922.258	100	UP_AtMSCtrl_DOWN_AtC32I
AT1G19870	1403.98	-1.93428	0.227648	-8.49679	1.949e-17	2.53708e-15	675	542	2124	2244	610.545	553.912	2304.61	2146.83	100	UP_AtMSCtrl_DOWN_AtC32I
AT5G38430	48166.4	1.77328	0.208707	8.49649	1.95412e-17	2.53708e-15	84109	71412	21614	21067	76077.5	72981.5	23451.9	20154.8	100	DOWN_AtMSCtrl_UP_AtC32I
AT5G53440	954.046	-2.09377	0.246719	-8.48644	2.13057e-17	2.74521e-15	422	335	1566	1456	381.704	342.363	1699.16	1392.95	100	UP_AtMSCtrl_DOWN_AtC32I
AT5G55660	1086.78	-2.6739	0.315252	-8.48179	2.21751e-17	2.83575e-15	228	375	2063	1588	206.228	383.242	2238.43	1519.24	100	UP_AtMSCtrl_DOWN_AtC32I
AT3G63500	2805.87	-1.90189	0.224599	-8.46793	2.49789e-17	3.17046e-15	1267	1197	4487	4166	1146.02	1223.31	4868.55	3985.61	100	UP_AtMSCtrl_DOWN_AtC32I
AT5G18170	3915.11	-1.91925	0.226724	-8.46512	2.55892e-17	3.22386e-15	1577	1809	5724	6454	1426.41	1848.76	6210.74	6174.53	100	UP_AtMSCtrl_DOWN_AtC32I
AT3G13520	659.481	2.16439	0.255863	8.45917	2.69296e-17	3.35489e-15	1102	1135	231	241	996.771	1159.95	250.643	230.564	100	DOWN_AtMSCtrl_UP_AtC32I
AT5G52280	225.691	-3.10971	0.367632	-8.45876	2.70237e-17	3.35489e-15	67	32	366	431	60.6022	32.7033	397.123	412.337	100	UP_AtMSCtrl_DOWN_AtC32I
AT3G23900	594.039	-2.29692	0.271615	-8.45655	2.75395e-17	3.39414e-15	254	168	858	1091	229.746	171.692	930.96	1043.76	100	UP_AtMSCtrl_DOWN_AtC32I
AT4G27260	458.916	-2.26245	0.267886	-8.44557	3.02572e-17	3.70226e-15	176	154	707	786	159.194	157.385	767.119	751.965	100	UP_AtMSCtrl_DOWN_AtC32I
AT1G31580	31310.3	2.50389	0.296692	8.43937	3.19056e-17	3.86196e-15	79472	33843	8793	9648	71883.3	34586.8	9540.71	9230.23	100	DOWN_AtMSCtrl_UP_AtC32I
AT5G63320	735.94	-2.36987	0.280824	-8.43896	3.20165e-17	3.86196e-15	234	260	1342	1056	211.656	265.714	1456.12	1010.27	100	UP_AtMSCtrl_DOWN_AtC32I
AT3G56410	989.312	-2.75245	0.326272	-8.43608	3.28164e-17	3.93058e-15	386	158	1764	1602	349.141	161.473	1914	1532.63	100	UP_AtMSCtrl_DOWN_AtC32I
AT2G26650	424.565	-2.41693	0.286726	-8.42941	3.47398e-17	4.13185e-15	127	150	677	727	114.873	153.297	734.568	695.52	100	UP_AtMSCtrl_DOWN_AtC32I
AT4G39940	806.028	2.1484	0.254934	8.42731	3.53708e-17	4.17768e-15	1619	1141	287	295	1464.4	1166.08	311.405	282.226	100	DOWN_AtMSCtrl_UP_AtC32I
AT1G03910	825.264	-2.05908	0.245016	-8.40383	4.32159e-17	5.06907e-15	328	335	1271	1341	296.68	342.363	1379.08	1282.93	100	UP_AtMSCtrl_DOWN_AtC32I
AT4G12030	253.779	3.66126	0.437819	8.3625	6.14045e-17	7.1532e-15	733	272	26	48	663.007	277.978	28.2109	45.9215	100	DOWN_AtMSCtrl_UP_AtC32I
AT1G11480	1620.19	-1.99196	0.238442	-8.35404	6.59676e-17	7.58092e-15	651	698	2609	2454	588.837	713.341	2830.86	2347.74	100	UP_AtMSCtrl_DOWN_AtC32I
AT4G14760	271.005	-2.64686	0.316815	-8.3546	6.56559e-17	7.58092e-15	88	68	464	451	79.597	69.4946	503.456	431.471	100	UP_AtMSCtrl_DOWN_AtC32I
AT2G02160	4896.23	-1.92373	0.230366	-8.35076	6.78231e-17	7.74184e-15	2198	2052	8172	6933	1988.12	2097.1	8866.9	6632.79	100	UP_AtMSCtrl_DOWN_AtC32I
AT5G53460	7130.56	-1.71811	0.205959	-8.342	7.30475e-17	8.28261e-15	3702	3229	9846	11697	3348.5	3299.97	10683.3	11190.5	100	UP_AtMSCtrl_DOWN_AtC32I
AT1G06670	477.982	-2.20898	0.26615	-8.29974	1.04335e-16	1.17519e-14	195	160	717	830	176.38	163.517	777.97	794.06	100	UP_AtMSCtrl_DOWN_AtC32I
AT5G28400	101.872	-4.27619	0.515489	-8.29542	1.08203e-16	1.21074e-14	14	7	188	192	12.6632	7.15385	203.987	183.686	100	UP_AtMSCtrl_DOWN_AtC32I
AT2G13370	848.672	-2.15929	0.260542	-8.2877	1.15462e-16	1.28352e-14	389	263	1160	1584	351.855	268.78	1258.64	1515.41	100	UP_AtMSCtrl_DOWN_AtC32I
AT5G50780	383.44	-2.32276	0.281011	-8.26573	1.38846e-16	1.53344e-14	139	127	612	642	125.727	129.791	664.041	614.201	100	UP_AtMSCtrl_DOWN_AtC32I
AT5G64572	411.881	-2.77304	0.33554	-8.26443	1.40366e-16	1.54023e-14	96	121	828	563	86.8331	123.659	898.409	538.621	100	UP_AtMSCtrl_DOWN_AtC32I
AT4G34190	2671.34	1.82569	0.220995	8.26122	1.44194e-16	1.57209e-14	4227	4414	1069	1245	3823.37	4511.01	1159.9	1191.09	100	DOWN_AtMSCtrl_UP_AtC32I
AT4G37800	1577.24	2.00674	0.243075	8.25562	1.5111e-16	1.63699e-14	2397	2822	557	682	2168.11	2884.02	604.364	652.469	100	DOWN_AtMSCtrl_UP_AtC32I
AT4G03060	96.9418	5.22602	0.633475	8.24977	1.587e-16	1.70834e-14	255	144	3	7	230.65	147.165	3.2551	6.69689	100	DOWN_AtMSCtrl_UP_AtC32I
AT4G34030	1685.78	-1.94352	0.236033	-8.23411	1.80902e-16	1.93508e-14	671	768	2434	2833	606.927	784.88	2640.97	2710.33	100	UP_AtMSCtrl_DOWN_AtC32I
AT2G43400	1672.55	-1.87518	0.227767	-8.2329	1.82735e-16	1.94247e-14	825	672	2245	2949	746.222	686.77	2435.9	2821.3	100	UP_AtMSCtrl_DOWN_AtC32I
AT3G54540	1428.7	-1.85671	0.225678	-8.22724	1.91572e-16	2.02376e-14	698	592	2148	2245	631.349	605.011	2330.65	2147.79	100	UP_AtMSCtrl_DOWN_AtC32I
AT2G26570	827.673	-2.16605	0.263844	-8.20958	2.21957e-16	2.33027e-14	366	266	1419	1221	331.051	271.846	1539.66	1168.13	100	UP_AtMSCtrl_DOWN_AtC32I
AT1G15200	830.824	-2.37328	0.289254	-8.20483	2.30912e-16	2.40942e-14	220	332	1223	1524	198.992	339.297	1327	1458.01	100	UP_AtMSCtrl_DOWN_AtC32I
AT5G54610	108.052	4.68012	0.570594	8.20219	2.36055e-16	2.44806e-14	304	138	7	9	274.971	141.033	7.59524	8.61029	100	DOWN_AtMSCtrl_UP_AtC32I
AT3G45830	474.461	-2.53829	0.309703	-8.19589	2.48748e-16	2.56407e-14	180	113	886	688	162.812	115.484	961.341	658.209	100	UP_AtMSCtrl_DOWN_AtC32I
AT3G24080	592.199	-2.22727	0.272174	-8.18323	2.7633e-16	2.83122e-14	218	215	1023	880	197.183	219.725	1109.99	841.895	100	UP_AtMSCtrl_DOWN_AtC32I
AT5G55040	1145.91	-1.99688	0.244322	-8.17317	3.0038e-16	3.0592e-14	573	391	1727	1873	518.285	399.594	1873.85	1791.9	100	UP_AtMSCtrl_DOWN_AtC32I
AT4G08310	431.791	-2.38764	0.292304	-8.16837	3.12578e-16	3.16448e-14	126	160	688	735	113.968	163.517	746.504	703.174	100	UP_AtMSCtrl_DOWN_AtC32I
AT3G52240	1462.69	-2.08583	0.255378	-8.16763	3.14518e-16	3.16528e-14	723	451	2365	2268	653.961	460.912	2566.11	2169.79	100	UP_AtMSCtrl_DOWN_AtC32I
AT5G67570	495.01	-2.33984	0.287091	-8.15016	3.63438e-16	3.63609e-14	206	137	675	963	186.329	140.011	732.398	921.301	100	UP_AtMSCtrl_DOWN_AtC32I
AT2G38040	4739.63	-1.84261	0.226166	-8.14716	3.72568e-16	3.70563e-14	2019	2258	7251	7272	1826.21	2307.63	7867.59	6957.11	100	UP_AtMSCtrl_DOWN_AtC32I
AT4G24570	1976.65	2.33411	0.286793	8.13866	3.9969e-16	3.95228e-14	2671	4092	678	599	2415.95	4181.94	735.653	573.063	100	DOWN_AtMSCtrl_UP_AtC32I
AT5G23080	691.205	-2.08652	0.25676	-8.12637	4.42329e-16	4.34863e-14	301	249	1136	1051	272.258	254.473	1232.6	1005.49	100	UP_AtMSCtrl_DOWN_AtC32I
AT1G24148	692.443	2.12135	0.26134	8.11722	4.77001e-16	4.66254e-14	1278	1073	206	307	1155.96	1096.58	223.517	293.707	100	DOWN_AtMSCtrl_UP_AtC32I
AT1G10960	1351.31	1.84589	0.227533	8.11261	4.95427e-16	4.81498e-14	2401	2013	518	642	2171.73	2057.24	562.048	614.201	100	DOWN_AtMSCtrl_UP_AtC32I
AT3G01160	227.035	-2.69123	0.331777	-8.11158	4.99651e-16	4.82844e-14	69	58	388	382	62.4113	59.2748	420.993	365.459	100	UP_AtMSCtrl_DOWN_AtC32I
AT1G14345	1048.91	1.89661	0.233875	8.1095	5.08285e-16	4.88413e-14	1844	1604	430	441	1667.92	1639.25	466.565	421.904	100	DOWN_AtMSCtrl_UP_AtC32I
AT2G38240	185.29	3.55067	0.437916	8.10809	5.14201e-16	4.91322e-14	265	434	19	39	239.695	443.539	20.6157	37.3113	100	DOWN_AtMSCtrl_UP_AtC32I
AT1G53590	300.942	-2.4773	0.30599	-8.096	5.67949e-16	5.39646e-14	112	80	454	552	101.305	81.7583	492.606	528.098	100	UP_AtMSCtrl_DOWN_AtC32I
AT2G46180	268.981	-2.61037	0.322648	-8.09046	5.94399e-16	5.61641e-14	97	62	430	479	87.7376	63.3627	466.565	458.259	100	UP_AtMSCtrl_DOWN_AtC32I
AT5G57655	8224.39	-1.76743	0.218571	-8.0863	6.1507e-16	5.77962e-14	3759	3982	10950	14160	3400.06	4069.52	11881.1	13546.9	100	UP_AtMSCtrl_DOWN_AtC32I
AT2G21210	964.666	1.93424	0.23939	8.07987	6.48342e-16	6.05879e-14	1759	1436	345	445	1591.03	1467.56	374.337	425.731	100	DOWN_AtMSCtrl_UP_AtC32I
AT2G38800	2289.67	-2.39552	0.296538	-8.0783	6.56763e-16	6.10395e-14	1075	479	3639	3918	972.349	489.528	3948.44	3748.35	100	UP_AtMSCtrl_DOWN_AtC32I
AT1G74730	1161.14	1.92176	0.238114	8.07076	6.98627e-16	6.45774e-14	1871	1940	421	536	1692.34	1982.64	456.8	512.791	100	DOWN_AtMSCtrl_UP_AtC32I
AT1G50660	609.834	-2.07033	0.257105	-8.05249	8.11289e-16	7.42011e-14	271	219	966	964	245.122	223.813	1048.14	922.258	100	UP_AtMSCtrl_DOWN_AtC32I
AT4G15530	3507.24	-2.24089	0.278286	-8.05246	8.11465e-16	7.42011e-14	968	1541	5066	6357	875.567	1574.87	5496.79	6081.73	100	UP_AtMSCtrl_DOWN_AtC32I
AT5G16720	353.282	-2.49108	0.30941	-8.05104	8.20957e-16	7.46676e-14	115	107	649	518	104.019	109.352	704.187	495.57	100	UP_AtMSCtrl_DOWN_AtC32I
AT3G54670	391.005	-2.36857	0.294528	-8.04193	8.84346e-16	8.00051e-14	157	109	663	618	142.008	111.396	719.378	591.24	100	UP_AtMSCtrl_DOWN_AtC32I
AT1G10450	468.996	-2.4528	0.305728	-8.02282	1.03347e-15	9.3001e-14	200	106	705	859	180.902	108.33	764.949	821.804	100	UP_AtMSCtrl_DOWN_AtC32I
AT1G28420	503.884	-2.30379	0.287719	-8.00709	1.17453e-15	1.05139e-13	220	137	838	802	198.992	140.011	909.259	767.272	100	UP_AtMSCtrl_DOWN_AtC32I
AT1G10470	2483.6	1.85192	0.231501	7.99963	1.24789e-15	1.11121e-13	4846	3323	974	1148	4383.26	3396.04	1056.82	1098.29	100	DOWN_AtMSCtrl_UP_AtC32I
AT4G26630	4450.73	-2.28667	0.28645	-7.9828	1.43051e-15	1.2672e-13	1178	1921	7558	6871	1065.51	1963.22	8200.69	6573.48	100	UP_AtMSCtrl_DOWN_AtC32I
AT3G27260	1394.3	-1.79456	0.224825	-7.98205	1.43922e-15	1.2683e-13	668	630	2006	2250	604.213	643.847	2176.58	2152.57	100	UP_AtMSCtrl_DOWN_AtC32I
AT1G76890	1441.28	-1.77792	0.223236	-7.96432	1.6614e-15	1.45655e-13	717	639	2084	2302	648.534	653.044	2261.21	2202.32	100	UP_AtMSCtrl_DOWN_AtC32I
AT1G70620	2160.33	-1.96565	0.246873	-7.96219	1.69016e-15	1.46664e-13	1130	723	2898	3905	1022.1	738.891	3144.43	3735.91	100	UP_AtMSCtrl_DOWN_AtC32I
AT3G19670	492.882	-2.2752	0.28575	-7.96221	1.68999e-15	1.46664e-13	218	137	703	911	197.183	140.011	762.779	871.553	100	UP_AtMSCtrl_DOWN_AtC32I
AT1G03740	2192.12	-2.06284	0.259668	-7.94414	1.95539e-15	1.68819e-13	1137	650	3474	3456	1028.43	664.286	3769.41	3306.35	100	UP_AtMSCtrl_DOWN_AtC32I
AT5G01015	117.478	3.59754	0.453159	7.93881	2.0413e-15	1.75346e-13	239	213	20	15	216.178	217.681	21.7007	14.3505	100	DOWN_AtMSCtrl_UP_AtC32I
AT1G65490	155.19	3.54849	0.448129	7.91846	2.40473e-15	2.05526e-13	339	260	12	37	306.629	265.714	13.0204	35.3979	100	DOWN_AtMSCtrl_UP_AtC32I
AT1G55250	408.16	-2.20073	0.278192	-7.91083	2.55674e-15	2.17425e-13	152	151	645	670	137.486	154.319	699.847	640.988	100	UP_AtMSCtrl_DOWN_AtC32I
AT1G80930	1332.76	-1.83249	0.231708	-7.9086	2.60291e-15	2.2025e-13	621	594	2055	2020	561.701	607.055	2229.75	1932.53	100	UP_AtMSCtrl_DOWN_AtC32I
AT3G61780	299.312	-2.79126	0.353069	-7.9057	2.66437e-15	2.24335e-13	110	50	522	502	99.4962	51.0989	566.388	480.263	100	UP_AtMSCtrl_DOWN_AtC32I
AT5G16680	524.985	-2.1816	0.276139	-7.90035	2.78115e-15	2.33013e-13	218	178	900	778	197.183	181.912	976.531	744.312	100	UP_AtMSCtrl_DOWN_AtC32I
AT1G18270	1370.49	-1.77909	0.225347	-7.89489	2.90582e-15	2.42266e-13	703	588	1918	2262	635.871	600.924	2081.1	2164.05	100	UP_AtMSCtrl_DOWN_AtC32I
AT1G26830	1514.7	-1.97886	0.250882	-7.88761	3.08031e-15	2.5556e-13	773	515	2468	2253	699.187	526.319	2677.87	2155.44	100	UP_AtMSCtrl_DOWN_AtC32I
AT1G09420	387.712	-2.23216	0.283874	-7.86322	3.74371e-15	3.09092e-13	154	130	541	723	139.295	132.857	587.004	691.693	100	UP_AtMSCtrl_DOWN_AtC32I
AT1G12900	15770.9	1.59419	0.2029	7.85701	3.93426e-15	3.23256e-13	25820	23517	7222	8215	23354.5	24033.9	7836.12	7859.28	100	DOWN_AtMSCtrl_UP_AtC32I
AT1G12360	1580.4	-2.11622	0.269774	-7.84442	4.34976e-15	3.55676e-13	812	440	2460	2580	734.463	449.671	2669.19	2468.28	100	UP_AtMSCtrl_DOWN_AtC32I
AT4G28080	8310.6	-1.63361	0.208678	-7.82834	4.94364e-15	4.02304e-13	4648	3814	12101	12554	4204.17	3897.83	13130	12010.4	100	UP_AtMSCtrl_DOWN_AtC32I
AT5G04560	718.358	-1.91444	0.244712	-7.82326	5.14745e-15	4.16895e-13	326	301	1064	1167	294.871	307.616	1154.48	1116.47	100	UP_AtMSCtrl_DOWN_AtC32I
AT3G03780	584.058	2.45444	0.313854	7.82031	5.26928e-15	4.24739e-13	1399	695	163	192	1265.41	710.275	176.861	183.686	100	DOWN_AtMSCtrl_UP_AtC32I
AT2G21530	1861.01	1.77558	0.227075	7.81936	5.30907e-15	4.25928e-13	2901	3070	766	890	2623.99	3137.47	831.137	851.462	100	DOWN_AtMSCtrl_UP_AtC32I
AT3G62150	890.343	-2.09891	0.268489	-7.81747	5.38946e-15	4.30347e-13	435	274	1473	1348	393.462	280.022	1598.26	1289.63	100	UP_AtMSCtrl_DOWN_AtC32I
AT1G56460	1012.64	-1.83729	0.235079	-7.81563	5.46883e-15	4.34644e-13	491	432	1537	1565	444.115	441.495	1667.7	1497.23	100	UP_AtMSCtrl_DOWN_AtC32I
AT5G17910	510.507	-2.34648	0.300268	-7.81462	5.51274e-15	4.36097e-13	228	126	852	818	206.228	128.769	924.45	782.58	100	UP_AtMSCtrl_DOWN_AtC32I
AT5G47690	2213.24	-1.98476	0.254577	-7.79631	6.37426e-15	5.01914e-13	1187	696	3421	3508	1073.65	711.297	3711.9	3356.1	100	UP_AtMSCtrl_DOWN_AtC32I
AT5G56360	830.359	-1.88492	0.242042	-7.78757	6.83081e-15	5.35384e-13	415	325	1187	1386	375.372	332.143	1287.94	1325.98	100	UP_AtMSCtrl_DOWN_AtC32I
AT1G52220	4844.17	1.66869	0.21467	7.77329	7.64718e-15	5.9662e-13	8103	7252	1967	2615	7329.25	7411.39	2134.26	2501.77	100	DOWN_AtMSCtrl_UP_AtC32I
AT5G20630	10455.7	1.58389	0.204261	7.75427	8.88505e-15	6.90031e-13	17289	15385	4921	5354	15638.1	15723.1	5339.46	5122.17	100	DOWN_AtMSCtrl_UP_AtC32I
AT2G26900	2685.92	1.67485	0.216102	7.75029	9.16809e-15	7.08777e-13	4650	3890	1127	1400	4205.98	3975.5	1222.83	1339.38	100	DOWN_AtMSCtrl_UP_AtC32I
AT5G45250	929.198	-1.89404	0.244778	-7.73781	1.01147e-14	7.7842e-13	481	345	1377	1500	435.07	352.583	1494.09	1435.05	100	UP_AtMSCtrl_DOWN_AtC32I
AT5G53800	501.755	-2.50339	0.323767	-7.73206	1.05819e-14	8.10705e-13	113	195	803	872	102.21	199.286	871.283	834.241	100	UP_AtMSCtrl_DOWN_AtC32I
AT1G70100	969.29	-1.87321	0.242338	-7.72975	1.07755e-14	8.21836e-13	503	368	1446	1544	454.969	376.088	1568.96	1477.14	100	UP_AtMSCtrl_DOWN_AtC32I
AT4G10300	1170.07	1.9935	0.258178	7.72141	1.15052e-14	8.7357e-13	1700	2156	423	502	1537.67	2203.39	458.97	480.263	100	DOWN_AtMSCtrl_UP_AtC32I
AT1G50732	569.346	2.0239	0.262905	7.69822	1.3798e-14	1.04301e-12	1072	840	191	253	969.636	858.462	207.242	242.045	100	DOWN_AtMSCtrl_UP_AtC32I
AT4G12320	993.757	1.88623	0.245123	7.69501	1.41488e-14	1.06479e-12	1801	1467	433	394	1629.02	1499.24	469.82	376.939	100	DOWN_AtMSCtrl_UP_AtC32I
AT1G49750	5545.25	1.74069	0.226239	7.69403	1.42566e-14	1.06818e-12	10700	7235	2370	2652	9678.27	7394.02	2571.53	2537.17	100	DOWN_AtMSCtrl_UP_AtC32I
AT2G21440	545.777	-2.10752	0.274221	-7.68546	1.52448e-14	1.13721e-12	243	187	920	809	219.796	191.11	998.232	773.969	100	UP_AtMSCtrl_DOWN_AtC32I
AT5G04020	193.491	-2.6841	0.349344	-7.68326	1.55091e-14	1.15187e-12	62	47	292	369	56.0797	48.033	316.83	353.022	100	UP_AtMSCtrl_DOWN_AtC32I
AT1G06720	365.467	-2.17966	0.283844	-7.67907	1.60242e-14	1.18495e-12	152	124	573	602	137.486	126.725	621.725	575.933	100	UP_AtMSCtrl_DOWN_AtC32I
AT4G13500	1137.93	2.03085	0.264739	7.67116	1.70452e-14	1.255e-12	2055	1760	326	565	1858.77	1798.68	353.721	540.535	100	DOWN_AtMSCtrl_UP_AtC32I
AT2G39260	745.421	-1.88161	0.24553	-7.66345	1.81009e-14	1.32699e-12	369	296	1115	1187	333.765	302.506	1209.81	1135.6	100	UP_AtMSCtrl_DOWN_AtC32I
AT1G64980	335.92	2.22549	0.29138	7.63774	2.21075e-14	1.61375e-12	600	552	116	116	542.707	564.132	125.864	110.977	100	DOWN_AtMSCtrl_UP_AtC32I
AT2G34730	305.406	-2.37036	0.310605	-7.63145	2.32122e-14	1.68715e-12	127	81	472	535	114.873	82.7803	512.136	511.834	100	UP_AtMSCtrl_DOWN_AtC32I
AT2G01100	1781.74	-2.26484	0.297083	-7.6236	2.4669e-14	1.78541e-12	463	792	2913	2862	418.789	809.407	3160.71	2738.07	100	UP_AtMSCtrl_DOWN_AtC32I
AT2G13970	420.358	-2.45158	0.322125	-7.61066	2.7269e-14	1.96522e-12	185	90	682	713	167.335	91.9781	739.994	682.126	100	UP_AtMSCtrl_DOWN_AtC32I
AT1G67120	375.183	-2.24781	0.295567	-7.60508	2.84734e-14	2.04335e-12	164	110	530	695	148.34	112.418	575.068	664.906	100	UP_AtMSCtrl_DOWN_AtC32I
AT2G43530	791.911	2.00942	0.265028	7.58192	3.40477e-14	2.43312e-12	1354	1285	240	386	1224.71	1313.24	260.408	369.286	100	DOWN_AtMSCtrl_UP_AtC32I
AT3G20550	734.105	-1.94055	0.256894	-7.55391	4.22379e-14	3.00578e-12	294	334	1033	1263	265.926	341.341	1120.84	1208.31	100	UP_AtMSCtrl_DOWN_AtC32I
AT1G24460	492.202	-2.19487	0.291058	-7.54099	4.664e-14	3.30522e-12	227	144	831	747	205.324	147.165	901.664	714.654	100	UP_AtMSCtrl_DOWN_AtC32I
AT4G21400	295.011	-2.41453	0.32122	-7.51674	5.6158e-14	3.96322e-12	121	75	417	566	109.446	76.6484	452.459	541.492	100	UP_AtMSCtrl_DOWN_AtC32I
AT5G18620	300.56	-2.58773	0.344395	-7.51385	5.74142e-14	4.03512e-12	118	63	401	623	106.732	64.3847	435.099	596.023	100	UP_AtMSCtrl_DOWN_AtC32I
AT1G69530	2458.9	1.64756	0.219374	7.51026	5.90107e-14	4.13026e-12	3857	3882	1068	1276	3488.7	3967.32	1158.82	1220.75	100	DOWN_AtMSCtrl_UP_AtC32I
AT4G17330	1489.59	-1.70369	0.226896	-7.50867	5.9732e-14	4.16361e-12	815	648	2015	2480	737.176	662.242	2186.34	2372.61	100	UP_AtMSCtrl_DOWN_AtC32I
AT5G23890	1062.35	-1.74908	0.233226	-7.49951	6.40567e-14	4.44684e-12	564	454	1547	1669	510.144	463.978	1678.55	1596.73	100	UP_AtMSCtrl_DOWN_AtC32I
AT1G45474	1970.92	1.72785	0.230412	7.49898	6.43184e-14	4.44686e-12	3571	2765	765	1043	3230.01	2825.77	830.052	997.837	100	DOWN_AtMSCtrl_UP_AtC32I
AT4G36690	2021.54	-1.74866	0.233292	-7.49558	6.60043e-14	4.54495e-12	958	967	2560	3610	866.521	988.253	2777.69	3453.68	100	UP_AtMSCtrl_DOWN_AtC32I
AT5G55100	899.773	-2.2572	0.301242	-7.49297	6.73313e-14	4.61763e-12	447	213	1281	1659	404.316	217.681	1389.93	1587.16	100	UP_AtMSCtrl_DOWN_AtC32I
AT5G12400	588.71	-2.28159	0.304708	-7.48779	7.00446e-14	4.78442e-12	283	142	948	967	255.977	145.121	1028.61	925.128	100	UP_AtMSCtrl_DOWN_AtC32I
AT3G09850	1401.3	-1.8416	0.246274	-7.47785	7.55501e-14	5.13982e-12	739	542	2268	2009	668.434	553.912	2460.86	1922.01	100	UP_AtMSCtrl_DOWN_AtC32I
AT3G12020	402.662	-2.06258	0.276207	-7.46751	8.17244e-14	5.53772e-12	180	145	585	695	162.812	148.187	634.745	664.906	100	UP_AtMSCtrl_DOWN_AtC32I
AT1G62560	167.419	3.04637	0.407983	7.4669	8.21075e-14	5.5416e-12	414	218	35	36	374.468	222.791	37.9762	34.4412	100	DOWN_AtMSCtrl_UP_AtC32I
AT5G11390	250.785	-2.37336	0.318008	-7.46322	8.44358e-14	5.67622e-12	89	80	417	406	80.5015	81.7583	452.459	388.42	100	UP_AtMSCtrl_DOWN_AtC32I
AT3G57410	3179.81	-1.58603	0.212704	-7.45652	8.88391e-14	5.94872e-12	1689	1615	4345	5045	1527.72	1650.5	4714.48	4826.55	100	UP_AtMSCtrl_DOWN_AtC32I
AT1G13220	262.737	-2.51489	0.337617	-7.44897	9.4075e-14	6.27462e-12	76	86	483	387	68.7428	87.8902	524.072	370.242	100	UP_AtMSCtrl_DOWN_AtC32I
AT2G22660	2210.04	-1.70963	0.229938	-7.43517	1.04435e-13	6.93842e-12	1244	924	3370	3255	1125.21	944.308	3656.57	3114.05	100	UP_AtMSCtrl_DOWN_AtC32I
AT1G76892	614.74	-2.61197	0.351507	-7.43076	1.07979e-13	7.14594e-12	237	128	1293	743	214.369	130.813	1402.95	710.827	100	UP_AtMSCtrl_DOWN_AtC32I
AT4G30660	909.671	1.812	0.24419	7.42045	1.16726e-13	7.69487e-12	1685	1280	350	446	1524.1	1308.13	379.762	426.688	100	DOWN_AtMSCtrl_UP_AtC32I
AT4G21660	3138.53	-1.69309	0.22851	-7.40924	1.27026e-13	8.34156e-12	1462	1608	4729	4659	1322.4	1643.34	5131.13	4457.26	100	UP_AtMSCtrl_DOWN_AtC32I
AT5G02380	8488.42	1.63183	0.220301	7.40731	1.28891e-13	8.43143e-12	12515	14042	3802	4346	11320	14350.6	4125.3	4157.81	100	DOWN_AtMSCtrl_UP_AtC32I
AT3G62530	2014.41	1.63287	0.220494	7.40551	1.30647e-13	8.5136e-12	3209	3122	875	1061	2902.58	3190.62	949.405	1015.06	100	DOWN_AtMSCtrl_UP_AtC32I
AT5G41370	1015.77	-1.7211	0.232482	-7.40318	1.32965e-13	8.63154e-12	538	449	1429	1638	486.627	458.868	1550.51	1567.07	100	UP_AtMSCtrl_DOWN_AtC32I
AT5G16030	3482.42	-1.91117	0.258222	-7.40124	1.34921e-13	8.72526e-12	1974	1115	5440	5333	1785.5	1139.51	5902.59	5102.07	100	UP_AtMSCtrl_DOWN_AtC32I
AT2G27285	351.163	-2.36915	0.32013	-7.40059	1.3558e-13	8.73467e-12	103	132	625	521	93.1646	134.901	678.147	498.44	100	UP_AtMSCtrl_DOWN_AtC32I
AT1G10070	3917.66	-2.28654	0.309217	-7.39461	1.41823e-13	9.10235e-12	939	1778	5463	7397	849.336	1817.08	5927.54	7076.7	100	UP_AtMSCtrl_DOWN_AtC32I
AT3G48390	629.586	-1.91281	0.258751	-7.39248	1.44119e-13	9.21496e-12	277	272	998	948	250.55	277.978	1082.86	906.95	100	UP_AtMSCtrl_DOWN_AtC32I
AT1G72030	586.22	1.91162	0.258697	7.38944	1.47444e-13	9.39227e-12	950	972	220	265	859.285	993.363	238.708	253.525	100	DOWN_AtMSCtrl_UP_AtC32I
AT1G15040	83.6476	-4.35258	0.589675	-7.38132	1.56734e-13	9.94673e-12	4	12	165	146	3.61804	12.2637	179.031	139.678	100	UP_AtMSCtrl_DOWN_AtC32I
AT5G14090	353.164	-2.0975	0.28425	-7.37906	1.59412e-13	1.00791e-11	150	129	544	580	135.677	131.835	590.259	554.885	100	UP_AtMSCtrl_DOWN_AtC32I
AT1G30380	23230.8	1.54608	0.210271	7.35278	1.94127e-13	1.22286e-11	35406	36395	10527	12837	32025.1	37194.9	11422.2	12281.1	100	DOWN_AtMSCtrl_UP_AtC32I
AT2G46250	568.659	-2.05184	0.279627	-7.33777	2.17181e-13	1.36303e-11	259	203	983	801	234.268	207.462	1066.59	766.316	100	UP_AtMSCtrl_DOWN_AtC32I
AT3G29030	522.455	2.03607	0.27828	7.31662	2.54298e-13	1.59011e-11	1063	703	197	205	961.495	718.451	213.752	196.123	100	DOWN_AtMSCtrl_UP_AtC32I
AT3G01440	685.207	1.878	0.257387	7.29642	2.95515e-13	1.83435e-11	1091	1143	249	330	986.821	1168.12	270.174	315.711	100	DOWN_AtMSCtrl_UP_AtC32I
AT5G44800	882.457	-1.72375	0.236244	-7.2965	2.95359e-13	1.83435e-11	446	408	1253	1411	403.412	416.967	1359.55	1349.9	100	UP_AtMSCtrl_DOWN_AtC32I
AT3G63160	20210.9	1.49061	0.204312	7.29575	2.9699e-13	1.8368e-11	32088	29943	10092	10733	29023.9	30601.1	10950.2	10268.2	100	DOWN_AtMSCtrl_UP_AtC32I
AT3G26960	80.6671	4.35676	0.597482	7.29186	3.05698e-13	1.88381e-11	180	142	3	12	162.812	145.121	3.2551	11.4804	100	DOWN_AtMSCtrl_UP_AtC32I
AT3G06145	179.077	2.82616	0.387996	7.28399	3.24099e-13	1.98999e-11	299	350	31	57	270.449	357.693	33.6361	54.5318	100	DOWN_AtMSCtrl_UP_AtC32I
AT5G43750	1285.12	1.67115	0.22976	7.27349	3.50324e-13	2.14328e-11	2027	2034	566	642	1833.44	2078.7	614.13	614.201	100	DOWN_AtMSCtrl_UP_AtC32I
AT3G15590	558.067	-2.0127	0.276747	-7.27272	3.52311e-13	2.14771e-11	284	182	875	878	256.881	186	949.405	839.982	100	UP_AtMSCtrl_DOWN_AtC32I
AT5G06110	2013.83	-1.71419	0.235788	-7.27005	3.59359e-13	2.18285e-11	1089	877	3209	2814	985.012	896.275	3481.88	2692.15	100	UP_AtMSCtrl_DOWN_AtC32I
AT4G37820	389.351	-2.13376	0.293601	-7.26757	3.66023e-13	2.21542e-11	159	142	670	566	143.817	145.121	726.973	541.492	100	UP_AtMSCtrl_DOWN_AtC32I
AT3G15970	571.795	-1.84861	0.254941	-7.25114	4.13281e-13	2.49258e-11	266	251	843	915	240.6	256.517	914.684	875.379	100	UP_AtMSCtrl_DOWN_AtC32I
AT5G02120	753.072	1.96729	0.271424	7.24803	4.22867e-13	2.54139e-11	1151	1329	244	364	1041.09	1358.21	264.748	348.238	100	DOWN_AtMSCtrl_UP_AtC32I
AT3G20600	186.624	2.51991	0.34796	7.24195	4.42263e-13	2.64859e-11	348	314	51	58	314.77	320.901	55.3368	55.4885	100	DOWN_AtMSCtrl_UP_AtC32I
AT4G21410	573.358	-2.10782	0.292947	-7.19523	6.23552e-13	3.72118e-11	295	161	830	1005	266.831	164.539	900.579	961.482	100	UP_AtMSCtrl_DOWN_AtC32I
AT1G64330	446.852	-2.10562	0.293	-7.18643	6.65071e-13	3.95508e-11	176	174	783	628	159.194	177.824	849.582	600.807	100	UP_AtMSCtrl_DOWN_AtC32I
AT1G70060	559.656	-2.20802	0.307276	-7.18578	6.68229e-13	3.96002e-11	277	144	941	857	250.55	147.165	1021.02	819.891	100	UP_AtMSCtrl_DOWN_AtC32I
AT1G72650	861.09	-2.14793	0.298934	-7.1853	6.70612e-13	3.96034e-11	454	218	1328	1432	410.648	222.791	1440.93	1369.99	100	UP_AtMSCtrl_DOWN_AtC32I
AT1G23870	1979.01	-1.66317	0.231519	-7.18372	6.78387e-13	3.99239e-11	957	1012	2993	2894	865.617	1034.24	3247.51	2768.69	100	UP_AtMSCtrl_DOWN_AtC32I
AT5G64290	1199.53	1.65348	0.230201	7.18277	6.8311e-13	4.00632e-11	2119	1687	535	603	1916.66	1724.08	580.494	576.889	100	DOWN_AtMSCtrl_UP_AtC32I
AT4G21710	1147.7	-1.84601	0.257078	-7.18074	6.93333e-13	4.0523e-11	652	400	1706	1820	589.741	408.792	1851.07	1741.19	100	UP_AtMSCtrl_DOWN_AtC32I
AT5G63780	1085.39	2.02976	0.282776	7.17797	7.07556e-13	4.12127e-11	2408	1281	410	428	2178.06	1309.15	444.864	409.467	100	DOWN_AtMSCtrl_UP_AtC32I
AT2G18700	2008.43	-1.85137	0.258334	-7.16657	7.68999e-13	4.46387e-11	1173	667	2891	3297	1060.99	681.66	3136.84	3154.24	100	UP_AtMSCtrl_DOWN_AtC32I
AT3G16950	1228.36	-1.62121	0.226391	-7.16111	8.00247e-13	4.62946e-11	666	590	1699	1949	602.404	602.967	1843.47	1864.61	100	UP_AtMSCtrl_DOWN_AtC32I
AT5G46840	1280.3	-1.72466	0.240924	-7.15853	8.15475e-13	4.70156e-11	617	618	2009	1831	558.083	631.583	2179.83	1751.72	100	UP_AtMSCtrl_DOWN_AtC32I
AT1G66820	519.112	1.89616	0.265216	7.14949	8.71032e-13	5.0049e-11	960	752	190	244	868.331	768.528	206.157	233.435	100	DOWN_AtMSCtrl_UP_AtC32I
AT4G10710	790.511	-1.7887	0.250427	-7.14262	9.15715e-13	5.24393e-11	397	343	1248	1148	359.091	350.539	1354.12	1098.29	100	UP_AtMSCtrl_DOWN_AtC32I
AT2G30570	38666	1.47124	0.206137	7.13719	9.52562e-13	5.43664e-11	60449	57722	17965	22477	54676.8	58990.7	19492.6	21503.7	100	DOWN_AtMSCtrl_UP_AtC32I
AT1G12780	4421.9	-1.55889	0.219039	-7.11694	1.10349e-12	6.27696e-11	2235	2408	5977	7024	2021.58	2460.92	6485.25	6719.85	100	UP_AtMSCtrl_DOWN_AtC32I
AT3G04790	3481.75	1.75748	0.247016	7.11482	1.12059e-12	6.353e-11	4935	6149	1610	1497	4463.76	6284.15	1746.91	1432.18	100	DOWN_AtMSCtrl_UP_AtC32I
AT1G53440	1206.65	-2.18626	0.30771	-7.10494	1.20377e-12	6.80189e-11	643	281	1759	2142	581.601	287.176	1908.58	2049.25	100	UP_AtMSCtrl_DOWN_AtC32I
AT2G22300	1715.36	-2.20854	0.310987	-7.1017	1.23235e-12	6.94032e-11	918	381	2580	2971	830.341	389.374	2799.39	2842.35	100	UP_AtMSCtrl_DOWN_AtC32I
AT1G54500	3390.85	1.56989	0.221201	7.09711	1.27395e-12	7.15093e-11	6155	4480	1598	1760	5567.26	4578.46	1733.89	1683.79	100	DOWN_AtMSCtrl_UP_AtC32I
AT4G10930	177.656	-2.84059	0.400328	-7.09564	1.28751e-12	7.20328e-11	52	39	365	238	47.0346	39.8572	396.038	227.694	100	UP_AtMSCtrl_DOWN_AtC32I
AT2G28950	1407.56	1.73633	0.244784	7.09334	1.30912e-12	7.28216e-11	2731	1820	625	650	2470.22	1860	678.147	621.854	100	DOWN_AtMSCtrl_UP_AtC32I
AT2G29180	779.179	1.72537	0.243242	7.09323	1.31017e-12	7.28216e-11	1316	1177	315	399	1190.34	1202.87	341.786	381.723	100	DOWN_AtMSCtrl_UP_AtC32I
AT3G06290	750.044	-2.22012	0.313636	-7.07865	1.45566e-12	8.06445e-11	381	181	987	1463	344.619	184.978	1070.93	1399.65	100	UP_AtMSCtrl_DOWN_AtC32I
AT5G20250	31765.6	-1.43818	0.203335	-7.07294	1.51688e-12	8.37632e-11	18905	16782	44383	46676	17099.8	17150.8	48157.1	44654.9	100	UP_AtMSCtrl_DOWN_AtC32I
AT1G03760	352.621	-2.34736	0.331957	-7.07126	1.53533e-12	8.45077e-11	164	81	587	567	148.34	82.7803	636.915	542.448	100	UP_AtMSCtrl_DOWN_AtC32I
AT1G53800	783.418	-1.744	0.246658	-7.07054	1.54333e-12	8.46738e-11	420	333	1183	1181	379.895	340.319	1283.6	1129.86	100	UP_AtMSCtrl_DOWN_AtC32I
AT2G01910	745.245	-1.77232	0.250739	-7.06837	1.56767e-12	8.57331e-11	407	300	1108	1154	368.136	306.594	1202.22	1104.03	100	UP_AtMSCtrl_DOWN_AtC32I
AT3G57450	395.61	2.1173	0.299579	7.06757	1.57671e-12	8.59508e-11	588	738	140	151	531.852	754.22	151.905	144.462	100	DOWN_AtMSCtrl_UP_AtC32I
AT3G62330	315.868	-2.11565	0.299496	-7.06402	1.61759e-12	8.78977e-11	132	115	425	591	119.395	117.528	461.14	565.409	100	UP_AtMSCtrl_DOWN_AtC32I
AT2G41960	513.79	-1.84378	0.261383	-7.05392	1.73947e-12	9.42196e-11	242	224	776	800	218.892	228.923	841.987	765.359	100	UP_AtMSCtrl_DOWN_AtC32I
AT3G02860	391.516	-1.97895	0.280577	-7.05315	1.74906e-12	9.44383e-11	163	166	548	684	147.435	169.648	594.599	654.382	100	UP_AtMSCtrl_DOWN_AtC32I
AT3G20410	1325.35	-1.60906	0.228208	-7.05085	1.77829e-12	9.57126e-11	761	607	1785	2149	688.333	620.341	1936.79	2055.95	100	UP_AtMSCtrl_DOWN_AtC32I
AT4G16150	2333.71	-1.56696	0.222345	-7.04743	1.82257e-12	9.77863e-11	1342	1117	3469	3361	1213.85	1141.55	3763.99	3215.46	100	UP_AtMSCtrl_DOWN_AtC32I
AT4G32330	1286.68	-1.71328	0.243963	-7.02271	2.17605e-12	1.16384e-10	753	510	1908	1959	681.097	521.209	2070.25	1874.17	100	UP_AtMSCtrl_DOWN_AtC32I
AT5G54280	293.571	-2.10921	0.300391	-7.02154	2.1944e-12	1.16998e-10	130	101	452	484	117.586	103.22	490.436	463.042	100	UP_AtMSCtrl_DOWN_AtC32I
AT5G50920	28003.7	-1.62831	0.231923	-7.02089	2.20466e-12	1.17178e-10	17347	11435	42364	40422	15690.6	11686.3	45966.4	38671.7	100	UP_AtMSCtrl_DOWN_AtC32I
AT1G65010	392.965	-1.99729	0.284528	-7.01967	2.22398e-12	1.17836e-10	174	154	641	587	157.385	157.385	695.507	561.582	100	UP_AtMSCtrl_DOWN_AtC32I
AT4G01000	3685.55	-1.62607	0.231713	-7.01761	2.257e-12	1.19214e-10	1819	1920	5730	5140	1645.31	1962.2	6217.25	4917.43	100	UP_AtMSCtrl_DOWN_AtC32I
AT3G18100	125.935	-2.99951	0.428363	-7.00228	2.51838e-12	1.32609e-10	39	20	211	229	35.2759	20.4396	228.942	219.084	100	UP_AtMSCtrl_DOWN_AtC32I
AT1G21450	864.662	-1.96291	0.280384	-7.0008	2.54502e-12	1.33598e-10	467	277	1437	1248	422.407	283.088	1559.19	1193.96	100	UP_AtMSCtrl_DOWN_AtC32I
AT2G44290	451.715	1.90293	0.272307	6.9882	2.78439e-12	1.45714e-10	738	742	166	210	667.529	758.308	180.116	200.907	100	DOWN_AtMSCtrl_UP_AtC32I
AT1G79000	947.5	-1.76189	0.252513	-6.97743	3.00624e-12	1.56841e-10	530	375	1475	1387	479.391	383.242	1600.43	1326.94	100	UP_AtMSCtrl_DOWN_AtC32I
AT4G36850	2445.4	-2.1641	0.310225	-6.9759	3.0392e-12	1.58076e-10	646	1175	3201	4728	584.314	1200.83	3473.2	4523.27	100	UP_AtMSCtrl_DOWN_AtC32I
AT4G00930	111.66	-2.99227	0.42947	-6.96736	3.22933e-12	1.67452e-10	28	24	177	214	25.3263	24.5275	192.051	204.734	100	UP_AtMSCtrl_DOWN_AtC32I
AT3G02260	2099.41	-1.61093	0.231271	-6.96556	3.27106e-12	1.69101e-10	1277	896	3036	3170	1155.06	915.693	3294.17	3032.74	100	UP_AtMSCtrl_DOWN_AtC32I
AT4G21280	20527.9	1.41678	0.203483	6.96265	3.33942e-12	1.72112e-10	33189	29078	10647	11312	30019.8	29717.1	11552.4	10822.2	100	DOWN_AtMSCtrl_UP_AtC32I
AT1G07135	1163.47	2.11153	0.303315	6.96151	3.36638e-12	1.72977e-10	1434	2429	410	449	1297.07	2482.39	444.864	429.558	100	DOWN_AtMSCtrl_UP_AtC32I
AT1G66090	364.674	1.9591	0.281473	6.96018	3.39835e-12	1.74094e-10	649	561	133	161	587.028	573.33	144.31	154.029	100	DOWN_AtMSCtrl_UP_AtC32I
AT3G47650	2683.97	1.51829	0.218215	6.95776	3.45728e-12	1.76581e-10	4136	4126	1326	1400	3741.06	4216.68	1438.76	1339.38	100	DOWN_AtMSCtrl_UP_AtC32I
AT1G50920	2128.77	-1.54864	0.22292	-6.94706	3.72984e-12	1.89931e-10	1250	1016	3126	3088	1130.64	1038.33	3391.82	2954.29	100	UP_AtMSCtrl_DOWN_AtC32I
AT2G02990	80.9416	3.87998	0.558713	6.94449	3.7982e-12	1.92413e-10	144	169	13	7	130.25	172.714	14.1055	6.69689	100	DOWN_AtMSCtrl_UP_AtC32I
AT5G08050	1642.53	1.57719	0.227117	6.94438	3.8012e-12	1.92413e-10	2504	2599	766	855	2264.9	2656.12	831.137	817.978	100	DOWN_AtMSCtrl_UP_AtC32I
AT4G32190	440.586	-1.92494	0.277496	-6.93685	4.00952e-12	2.02356e-10	196	186	709	654	177.284	190.088	769.29	625.681	100	UP_AtMSCtrl_DOWN_AtC32I
AT4G20850	3996.36	-1.67963	0.242419	-6.92865	4.24882e-12	2.13799e-10	2492	1515	5550	6440	2254.04	1548.3	6021.94	6161.14	100	UP_AtMSCtrl_DOWN_AtC32I
AT5G37260	635.755	1.73947	0.251106	6.92721	4.29214e-12	2.15342e-10	1046	989	281	294	946.118	1010.74	304.895	281.269	100	DOWN_AtMSCtrl_UP_AtC32I
AT2G45460	151.007	-2.75627	0.398825	-6.91097	4.81366e-12	2.4009e-10	53	29	263	252	47.9391	29.6374	285.364	241.088	100	UP_AtMSCtrl_DOWN_AtC32I
AT5G57160	253.158	-2.21719	0.320808	-6.91126	4.80371e-12	2.4009e-10	112	76	398	420	101.305	77.6704	431.844	401.814	100	UP_AtMSCtrl_DOWN_AtC32I
AT1G28260	954.034	-1.89873	0.274943	-6.90589	4.98885e-12	2.481e-10	530	320	1565	1371	479.391	327.033	1698.08	1311.63	100	UP_AtMSCtrl_DOWN_AtC32I
AT5G41260	1861.7	-1.62131	0.235009	-6.89894	5.23912e-12	2.59787e-10	1139	779	2511	3027	1030.24	796.121	2724.52	2895.93	100	UP_AtMSCtrl_DOWN_AtC32I
AT4G02020	527.713	-1.99679	0.289689	-6.89288	5.46736e-12	2.70316e-10	284	162	774	887	256.881	165.561	839.817	848.592	100	UP_AtMSCtrl_DOWN_AtC32I
AT3G48420	1271.49	1.58392	0.229839	6.89143	5.52352e-12	2.72301e-10	2123	1853	548	708	1920.28	1893.73	594.599	677.343	100	DOWN_AtMSCtrl_UP_AtC32I
AT1G27020	5049.68	-1.45635	0.211542	-6.88446	5.80069e-12	2.85139e-10	3109	2527	6516	8084	2812.12	2582.54	7070.09	7733.95	100	UP_AtMSCtrl_DOWN_AtC32I
AT1G21610	810.527	-1.74549	0.2537	-6.88012	5.98041e-12	2.93126e-10	447	333	1040	1431	404.316	340.319	1128.44	1369.04	100	UP_AtMSCtrl_DOWN_AtC32I
AT1G65280	954.129	-1.79611	0.261234	-6.87548	6.17805e-12	3.01943e-10	398	483	1491	1406	359.995	493.616	1617.79	1345.12	100	UP_AtMSCtrl_DOWN_AtC32I
AT1G72910	917.53	1.61317	0.234664	6.87439	6.22541e-12	3.03386e-10	1527	1355	418	471	1381.19	1384.78	453.544	450.605	100	DOWN_AtMSCtrl_UP_AtC32I
AT2G16485	775.477	-1.76308	0.256501	-6.87357	6.26133e-12	3.04265e-10	386	349	1249	1088	349.141	356.671	1355.21	1040.89	100	UP_AtMSCtrl_DOWN_AtC32I
AT5G58310	229.118	2.62681	0.382262	6.87174	6.34236e-12	3.07324e-10	536	297	74	50	484.818	303.528	80.2926	47.8349	100	DOWN_AtMSCtrl_UP_AtC32I
AT3G10930	76.3106	3.90204	0.568047	6.86923	6.45516e-12	3.11901e-10	138	158	6	13	124.823	161.473	6.51021	12.4371	100	DOWN_AtMSCtrl_UP_AtC32I
AT1G58180	2572.75	-1.54969	0.225624	-6.86844	6.49089e-12	3.1274e-10	1294	1419	3463	4090	1170.44	1450.19	3757.47	3912.9	100	UP_AtMSCtrl_DOWN_AtC32I
AT5G58130	559.127	-1.8336	0.267167	-6.86313	6.73695e-12	3.23678e-10	285	227	893	813	257.786	231.989	968.936	777.796	100	UP_AtMSCtrl_DOWN_AtC32I
AT2G06520	44447.9	1.40307	0.204521	6.86027	6.87295e-12	3.29282e-10	74252	60518	21801	26264	67161.7	61848.1	23654.8	25126.7	100	DOWN_AtMSCtrl_UP_AtC32I
AT4G34140	327.162	-2.01483	0.29395	-6.85433	7.16486e-12	3.42303e-10	148	123	444	593	133.868	125.703	481.755	567.322	100	UP_AtMSCtrl_DOWN_AtC32I
AT3G44260	1473.92	1.93613	0.282497	6.85361	7.20088e-12	3.4306e-10	1908	2885	602	594	1725.81	2948.41	653.191	568.279	100	DOWN_AtMSCtrl_UP_AtC32I
AT4G00165	1722.51	1.7206	0.251443	6.84289	7.76132e-12	3.68557e-10	3151	2383	866	695	2850.11	2435.38	939.64	664.906	100	DOWN_AtMSCtrl_UP_AtC32I
AT5G38150	161.841	-2.72262	0.397895	-6.84255	7.77939e-12	3.68557e-10	61	29	261	292	55.1752	29.6374	283.194	279.356	100	UP_AtMSCtrl_DOWN_AtC32I
AT4G24800	1920.98	-1.71768	0.251225	-6.8372	8.07543e-12	3.81519e-10	1171	716	2883	2890	1059.18	731.737	3128.15	2764.86	100	UP_AtMSCtrl_DOWN_AtC32I
AT1G72150	31696	-1.55749	0.227822	-6.8364	8.12081e-12	3.81543e-10	15279	17937	46627	46034	13820	18331.2	50591.9	44040.7	100	UP_AtMSCtrl_DOWN_AtC32I
AT4G33740	875.512	-1.61996	0.236958	-6.83646	8.11725e-12	3.81543e-10	468	427	1252	1342	423.311	436.385	1358.46	1283.89	100	UP_AtMSCtrl_DOWN_AtC32I
AT5G36120	337.613	1.9657	0.287572	6.83552	8.17095e-12	3.82842e-10	592	528	133	137	535.47	539.605	144.31	131.068	100	DOWN_AtMSCtrl_UP_AtC32I
AT1G03060	775.526	-2.00002	0.292662	-6.8339	8.26386e-12	3.86131e-10	431	225	1235	1194	389.844	229.945	1340.02	1142.3	100	UP_AtMSCtrl_DOWN_AtC32I
AT5G45190	627.876	-1.75201	0.256955	-6.81837	9.20788e-12	4.29062e-10	327	273	972	922	295.775	279	1054.65	882.076	100	UP_AtMSCtrl_DOWN_AtC32I
AT4G29900	1786.14	-1.51213	0.221929	-6.81358	9.52003e-12	4.42395e-10	1083	856	2457	2743	979.585	874.814	2665.93	2624.22	100	UP_AtMSCtrl_DOWN_AtC32I
AT1G06230	1240.06	-1.59485	0.234164	-6.81083	9.70354e-12	4.48683e-10	732	559	1808	1845	662.102	571.286	1961.74	1765.11	100	UP_AtMSCtrl_DOWN_AtC32I
AT3G49490	1141.5	-1.6853	0.247446	-6.81077	9.70811e-12	4.48683e-10	685	453	1641	1780	619.59	462.956	1780.54	1702.92	100	UP_AtMSCtrl_DOWN_AtC32I
AT1G22630	629.376	1.9786	0.29081	6.80377	1.01915e-11	4.69749e-10	869	1196	218	285	786.02	1222.29	236.538	272.659	100	DOWN_AtMSCtrl_UP_AtC32I
AT3G28340	129.114	2.76066	0.40594	6.80066	1.04143e-11	4.78721e-10	259	211	34	31	234.268	215.638	36.8912	29.6577	100	DOWN_AtMSCtrl_UP_AtC32I
AT5G38410	101609	1.41594	0.208224	6.8001	1.04546e-11	4.79277e-10	167858	140718	54775	53688	151829	143811	59432.8	51363.2	100	DOWN_AtMSCtrl_UP_AtC32I
AT3G16840	386.363	-1.9425	0.285752	-6.79784	1.06201e-11	4.85555e-10	171	161	505	709	154.671	164.539	547.942	678.299	100	UP_AtMSCtrl_DOWN_AtC32I
AT2G35630	1067.81	-1.71449	0.252721	-6.78414	1.16779e-11	5.32486e-10	638	411	1456	1771	577.078	420.033	1579.81	1694.31	100	UP_AtMSCtrl_DOWN_AtC32I
AT1G07040	2074.77	-1.48139	0.218417	-6.78241	1.18186e-11	5.3686e-10	1259	1027	2753	3265	1138.78	1049.57	2987.1	3123.62	100	UP_AtMSCtrl_DOWN_AtC32I
AT5G44180	731.368	-1.67475	0.246934	-6.78219	1.18369e-11	5.3686e-10	404	325	1079	1105	365.422	332.143	1170.75	1057.15	100	UP_AtMSCtrl_DOWN_AtC32I
AT1G80790	614.126	-1.70703	0.251873	-6.77734	1.2241e-11	5.53712e-10	317	283	907	937	286.73	289.22	984.126	896.427	100	UP_AtMSCtrl_DOWN_AtC32I
AT1G20340	47683.5	1.44712	0.213547	6.77661	1.2303e-11	5.5504e-10	69893	74692	24532	25675	63219	76333.6	26618.1	24563.2	100	DOWN_AtMSCtrl_UP_AtC32I
AT1G32530	647.731	-1.79726	0.265307	-6.7743	1.25014e-11	5.62498e-10	365	243	973	1000	330.146	248.341	1055.74	956.699	100	UP_AtMSCtrl_DOWN_AtC32I
AT5G02810	1877.52	-2.13762	0.315701	-6.77102	1.27875e-11	5.73853e-10	1052	429	2610	3437	951.546	438.429	2831.94	3288.17	100	UP_AtMSCtrl_DOWN_AtC32I
AT1G21580	915.889	-2.02047	0.298473	-6.76933	1.29378e-11	5.79069e-10	520	248	1333	1561	470.346	253.451	1446.35	1493.41	100	UP_AtMSCtrl_DOWN_AtC32I
AT1G45201	1309.31	1.67838	0.247972	6.76844	1.30177e-11	5.81116e-10	2463	1725	514	720	2227.81	1762.91	557.708	688.823	100	DOWN_AtMSCtrl_UP_AtC32I
AT1G65860	123.102	3.51141	0.518993	6.76582	1.32555e-11	5.90181e-10	310	169	8	32	280.398	172.714	8.68028	30.6144	100	DOWN_AtMSCtrl_UP_AtC32I
AT2G30600	5830.37	-1.63621	0.24194	-6.76288	1.3528e-11	6.00742e-10	3584	2382	7097	10395	3241.77	2434.35	7700.49	9944.88	100	UP_AtMSCtrl_DOWN_AtC32I
AT1G35112	80.8878	-3.52377	0.521203	-6.76084	1.37196e-11	6.07664e-10	15	12	158	132	13.5677	12.2637	171.435	126.284	100	UP_AtMSCtrl_DOWN_AtC32I
AT4G24230	1576.68	-1.70526	0.252259	-6.75998	1.38014e-11	6.097e-10	671	855	2113	2648	606.927	873.792	2292.68	2533.34	100	UP_AtMSCtrl_DOWN_AtC32I
AT1G64390	617.586	1.80617	0.267531	6.75126	1.46569e-11	6.44146e-10	1205	813	264	275	1089.94	830.869	286.449	263.092	100	DOWN_AtMSCtrl_UP_AtC32I
AT4G16630	260.579	-2.30465	0.341352	-6.75153	1.46293e-11	6.44146e-10	79	102	461	383	71.4564	104.242	500.201	366.416	100	UP_AtMSCtrl_DOWN_AtC32I
AT2G26010	444.316	-2.40269	0.356391	-6.74173	1.56515e-11	6.84319e-10	94	194	653	821	85.024	198.264	708.528	785.45	100	UP_AtMSCtrl_DOWN_AtC32I
AT3G47070	4553.85	1.75558	0.260399	6.74191	1.56314e-11	6.84319e-10	5912	8519	1864	2236	5347.47	8706.24	2022.5	2139.18	100	DOWN_AtMSCtrl_UP_AtC32I
AT2G43650	417.039	-1.91019	0.283359	-6.74123	1.57048e-11	6.84892e-10	220	148	608	688	198.992	151.253	659.701	658.209	100	UP_AtMSCtrl_DOWN_AtC32I
AT5G03850	1535.86	1.53467	0.227909	6.73371	1.65396e-11	7.19449e-10	2717	2064	737	812	2457.56	2109.36	799.671	776.839	100	DOWN_AtMSCtrl_UP_AtC32I
AT3G50685	1670.14	1.77904	0.26428	6.73163	1.67777e-11	7.27946e-10	2927	2472	536	967	2647.5	2526.33	581.579	925.128	100	DOWN_AtMSCtrl_UP_AtC32I
AT4G27300	891.891	-1.66562	0.247545	-6.72857	1.71343e-11	7.41526e-10	509	386	1144	1538	460.396	394.484	1241.28	1471.4	100	UP_AtMSCtrl_DOWN_AtC32I
AT2G11240	2496.27	-1.83644	0.27324	-6.721	1.80485e-11	7.79109e-10	1525	787	3403	4295	1379.38	804.297	3692.37	4109.02	100	UP_AtMSCtrl_DOWN_AtC32I
AT5G04240	468.506	-2.1958	0.326749	-6.72013	1.81561e-11	7.81771e-10	235	120	831	666	212.56	122.637	901.664	637.161	100	UP_AtMSCtrl_DOWN_AtC32I
AT1G32130	1750.62	-1.50214	0.223646	-6.71659	1.86028e-11	7.98981e-10	985	916	2532	2538	890.943	936.133	2747.31	2428.1	100	UP_AtMSCtrl_DOWN_AtC32I
AT2G42540	402.21	2.82194	0.420171	6.71618	1.86545e-11	7.99184e-10	388	1036	83	114	350.95	1058.77	90.0579	109.064	100	DOWN_AtMSCtrl_UP_AtC32I
AT1G44000	1088.24	1.72962	0.25782	6.70861	1.96486e-11	8.39655e-10	2063	1447	401	599	1866.01	1478.8	435.099	573.063	100	DOWN_AtMSCtrl_UP_AtC32I
AT1G17100	1772.23	1.47411	0.219754	6.70798	1.97342e-11	8.41203e-10	2797	2625	874	970	2529.92	2682.69	948.32	927.998	100	DOWN_AtMSCtrl_UP_AtC32I
AT1G22750	394.72	1.87891	0.280267	6.70401	2.02777e-11	8.62208e-10	645	644	146	187	583.41	658.154	158.415	178.903	100	DOWN_AtMSCtrl_UP_AtC32I
AT4G01870	609.892	-1.7656	0.263962	-6.68884	2.2495e-11	9.54103e-10	272	302	926	920	246.027	308.638	1004.74	880.163	100	UP_AtMSCtrl_DOWN_AtC32I
AT4G03000	769.536	-1.80265	0.269679	-6.68444	2.31809e-11	9.80748e-10	375	339	1303	1023	339.192	346.451	1413.8	978.703	100	UP_AtMSCtrl_DOWN_AtC32I
AT5G64660	198.582	2.49298	0.373027	6.68311	2.33918e-11	9.87214e-10	286	407	53	65	258.69	415.945	57.5068	62.1854	100	DOWN_AtMSCtrl_UP_AtC32I
AT1G21400	2872.68	-1.66246	0.249448	-6.66456	2.6546e-11	1.11756e-09	1220	1620	3957	4639	1103.5	1655.61	4293.48	4438.13	100	UP_AtMSCtrl_DOWN_AtC32I
AT1G49975	463.585	1.82874	0.274842	6.65379	2.85644e-11	1.19661e-09	843	670	168	235	762.503	684.726	182.286	224.824	100	DOWN_AtMSCtrl_UP_AtC32I
AT1G70760	4954.87	1.49045	0.223995	6.65397	2.85296e-11	1.19661e-09	7090	8028	2367	2753	6412.98	8204.45	2568.28	2633.79	100	DOWN_AtMSCtrl_UP_AtC32I
AT3G51510	2642.84	1.44656	0.217825	6.6409	3.1178e-11	1.30289e-09	4396	3677	1228	1573	3976.23	3757.82	1332.42	1504.89	100	DOWN_AtMSCtrl_UP_AtC32I
AT1G19485	337.757	-2.17359	0.327794	-6.63095	3.33537e-11	1.38436e-09	170	89	465	629	153.767	90.9561	504.541	601.764	100	UP_AtMSCtrl_DOWN_AtC32I
AT1G32810	700.964	-1.62097	0.244458	-6.63087	3.33718e-11	1.38436e-09	382	335	997	1081	345.523	342.363	1081.78	1034.19	100	UP_AtMSCtrl_DOWN_AtC32I
AT4G01950	357.575	1.91028	0.288061	6.6315	3.32292e-11	1.38436e-09	676	507	144	151	611.449	518.143	156.245	144.462	100	DOWN_AtMSCtrl_UP_AtC32I
AT5G44568	163.461	2.79579	0.421762	6.62883	3.38362e-11	1.40021e-09	416	191	38	43	376.277	195.198	41.2313	41.138	100	DOWN_AtMSCtrl_UP_AtC32I
AT5G35480	653.445	1.80937	0.273174	6.6235	3.50782e-11	1.44808e-09	947	1152	247	326	856.572	1177.32	268.004	311.884	100	DOWN_AtMSCtrl_UP_AtC32I
AT1G04780	1169.1	-1.53087	0.231401	-6.61563	3.6996e-11	1.52356e-09	676	578	1696	1708	611.449	590.704	1840.22	1634.04	100	UP_AtMSCtrl_DOWN_AtC32I
AT4G15180	597.503	-1.78209	0.269494	-6.61274	3.77259e-11	1.54986e-09	308	254	974	831	278.589	259.583	1056.82	795.017	100	UP_AtMSCtrl_DOWN_AtC32I
AT5G45340	549.473	1.71068	0.258742	6.6115	3.80442e-11	1.55917e-09	912	840	252	252	824.914	858.462	273.429	241.088	100	DOWN_AtMSCtrl_UP_AtC32I
AT3G56880	1924.83	1.48399	0.225022	6.59488	4.25614e-11	1.74011e-09	3207	2711	1012	972	2900.77	2770.58	1098.06	929.911	100	DOWN_AtMSCtrl_UP_AtC32I
AT2G28605	502.726	1.76032	0.266943	6.59438	4.27049e-11	1.74179e-09	831	784	192	261	751.649	801.231	208.327	249.698	100	DOWN_AtMSCtrl_UP_AtC32I
AT3G05670	475.843	-1.90336	0.288975	-6.58659	4.50048e-11	1.83018e-09	248	173	792	672	224.319	176.802	859.347	642.902	100	UP_AtMSCtrl_DOWN_AtC32I
AT3G48710	252.782	-2.19397	0.33311	-6.58632	4.50873e-11	1.83018e-09	121	70	393	422	109.446	71.5385	426.419	403.727	100	UP_AtMSCtrl_DOWN_AtC32I
AT5G19310	220.085	-2.34225	0.355668	-6.58551	4.5334e-11	1.83581e-09	100	53	358	363	90.4511	54.1649	388.442	347.282	100	UP_AtMSCtrl_DOWN_AtC32I
AT1G21160	540.95	-2.02407	0.307596	-6.58029	4.69527e-11	1.89684e-09	302	150	790	920	273.162	153.297	857.177	880.163	100	UP_AtMSCtrl_DOWN_AtC32I
AT5G07030	226.305	2.41321	0.366759	6.57984	4.70969e-11	1.89816e-09	493	309	82	57	445.924	315.791	88.9728	54.5318	100	DOWN_AtMSCtrl_UP_AtC32I
AT3G47340	20787.8	-2.24454	0.341514	-6.57233	4.95355e-11	1.99173e-09	4330	10346	31996	35481	3916.53	10573.4	34716.8	33944.6	100	UP_AtMSCtrl_DOWN_AtC32I
AT3G27530	623.74	-1.69515	0.25821	-6.56501	5.20277e-11	2.087e-09	359	258	901	971	324.719	263.671	977.616	928.955	100	UP_AtMSCtrl_DOWN_AtC32I
AT5G43130	1067.27	-1.5322	0.233621	-6.55847	5.4361e-11	2.17546e-09	634	512	1401	1727	573.46	523.253	1520.13	1652.22	100	UP_AtMSCtrl_DOWN_AtC32I
AT2G20890	8399.8	1.35169	0.206933	6.53202	6.48882e-11	2.59065e-09	12762	12326	4406	4890	11543.4	12596.9	4780.66	4678.26	100	DOWN_AtMSCtrl_UP_AtC32I
AT4G00990	322.295	-1.94664	0.298031	-6.53165	6.50475e-11	2.59093e-09	159	119	433	579	143.817	121.615	469.82	553.929	100	UP_AtMSCtrl_DOWN_AtC32I
AT2G35960	857.159	1.55247	0.237741	6.53011	6.57202e-11	2.60552e-09	1409	1255	388	471	1274.46	1282.58	420.993	450.605	100	DOWN_AtMSCtrl_UP_AtC32I
AT4G36730	3514.23	-1.38978	0.212825	-6.53015	6.57048e-11	2.60552e-09	2235	1821	4546	5479	2021.58	1861.02	4932.57	5241.75	100	UP_AtMSCtrl_DOWN_AtC32I
AT5G14200	721.113	2.21602	0.339438	6.52851	6.64284e-11	2.62748e-09	1806	724	232	271	1633.55	739.913	251.728	259.265	100	DOWN_AtMSCtrl_UP_AtC32I
AT5G61190	245.244	-2.16632	0.331996	-6.52515	6.79315e-11	2.68069e-09	117	71	387	400	105.828	72.5605	419.908	382.68	100	UP_AtMSCtrl_DOWN_AtC32I
AT4G28660	1086.88	1.6873	0.258601	6.52471	6.81327e-11	2.68241e-09	1540	1883	513	495	1392.95	1924.39	556.623	473.566	100	DOWN_AtMSCtrl_UP_AtC32I
AT5G18240	270.272	-1.97765	0.303274	-6.52101	6.98361e-11	2.74312e-09	120	108	404	443	108.541	110.374	438.354	423.818	100	UP_AtMSCtrl_DOWN_AtC32I
AT3G05380	338.278	-1.89295	0.290705	-6.51159	7.43599e-11	2.91409e-09	157	142	449	605	142.008	145.121	487.181	578.803	100	UP_AtMSCtrl_DOWN_AtC32I
AT2G39470	2656.67	1.45702	0.224351	6.49438	8.33737e-11	3.25981e-09	3922	4151	1240	1559	3547.49	4242.23	1345.44	1491.49	100	DOWN_AtMSCtrl_UP_AtC32I
AT4G28260	2396.42	-1.46201	0.225187	-6.49243	8.44653e-11	3.29492e-09	1429	1233	3566	3307	1292.55	1260.1	3869.23	3163.8	100	UP_AtMSCtrl_DOWN_AtC32I
AT4G31420	1131.1	-1.52913	0.235592	-6.49055	8.55219e-11	3.32343e-09	661	554	1673	1615	597.882	566.176	1815.26	1545.07	100	UP_AtMSCtrl_DOWN_AtC32I
AT5G43560	1148.33	-1.82361	0.280969	-6.49044	8.55869e-11	3.32343e-09	701	369	1754	1755	634.062	377.11	1903.15	1679.01	100	UP_AtMSCtrl_DOWN_AtC32I
AT3G14172	367.946	-1.85264	0.28553	-6.48841	8.67495e-11	3.3609e-09	190	144	499	639	171.857	147.165	541.432	611.331	100	UP_AtMSCtrl_DOWN_AtC32I
AT5G47680	764.594	-1.69798	0.262224	-6.47532	9.46104e-11	3.65712e-09	364	383	1219	1061	329.242	391.418	1322.66	1015.06	100	UP_AtMSCtrl_DOWN_AtC32I
AT5G22450	786.48	-1.77839	0.27481	-6.47137	9.71209e-11	3.74565e-09	476	273	1123	1273	430.547	279	1218.49	1217.88	100	UP_AtMSCtrl_DOWN_AtC32I
AT5G41050	358.807	1.82068	0.281801	6.46089	1.04091e-10	4.00537e-09	630	537	141	171	569.842	548.803	152.99	163.596	100	DOWN_AtMSCtrl_UP_AtC32I
AT3G01320	527.169	-2.08724	0.32311	-6.45983	1.04818e-10	4.02425e-09	291	135	714	975	263.213	137.967	774.715	932.781	100	UP_AtMSCtrl_DOWN_AtC32I
AT1G28060	467.623	-1.73414	0.26867	-6.45454	1.08546e-10	4.158e-09	254	198	697	713	229.746	202.352	756.269	682.126	100	UP_AtMSCtrl_DOWN_AtC32I
AT1G18620	1665.51	-1.65155	0.255892	-6.4541	1.08861e-10	4.16069e-09	1067	629	2392	2570	965.113	642.825	2595.4	2458.72	100	UP_AtMSCtrl_DOWN_AtC32I
AT5G62140	414.552	1.87984	0.291297	6.45333	1.09419e-10	4.17263e-09	718	640	192	153	649.439	654.066	208.327	146.375	100	DOWN_AtMSCtrl_UP_AtC32I
AT2G26990	673.163	-1.7352	0.269117	-6.44777	1.13508e-10	4.31891e-09	399	255	1013	1016	360.9	260.605	1099.14	972.006	100	UP_AtMSCtrl_DOWN_AtC32I
AT4G29940	189.291	-2.37426	0.368361	-6.44548	1.15233e-10	4.37476e-09	51	75	284	341	46.1301	76.6484	308.15	326.234	100	UP_AtMSCtrl_DOWN_AtC32I
AT5G63810	1690.3	-1.43438	0.222641	-6.44256	1.17477e-10	4.45e-09	976	923	2374	2466	882.803	943.286	2575.87	2359.22	100	UP_AtMSCtrl_DOWN_AtC32I
AT1G42550	4068.18	-1.6793	0.260864	-6.43746	1.21493e-10	4.59188e-09	1669	2312	6303	5813	1509.63	2362.81	6838.97	5561.29	100	UP_AtMSCtrl_DOWN_AtC32I
AT2G16365	580.903	-1.64293	0.255371	-6.4335	1.24699e-10	4.70262e-09	319	269	856	869	288.539	274.912	928.79	831.371	100	UP_AtMSCtrl_DOWN_AtC32I
AT5G35735	2051.35	1.42736	0.222029	6.4287	1.28697e-10	4.84267e-09	3170	3047	1087	1092	2867.3	3113.97	1179.43	1044.72	100	DOWN_AtMSCtrl_UP_AtC32I
AT1G67310	756.537	-1.7745	0.276085	-6.42736	1.29837e-10	4.87477e-09	459	263	1075	1229	415.171	268.78	1166.41	1175.78	100	UP_AtMSCtrl_DOWN_AtC32I
AT4G28760	1293.69	-1.50313	0.233896	-6.42648	1.30592e-10	4.89233e-09	781	629	1906	1837	706.423	642.825	2068.08	1757.46	100	UP_AtMSCtrl_DOWN_AtC32I
AT3G28070	523.716	1.78331	0.277518	6.42592	1.31072e-10	4.8995e-09	942	755	183	285	852.049	771.594	198.561	272.659	100	DOWN_AtMSCtrl_UP_AtC32I
AT5G59820	210.192	2.52809	0.393457	6.42532	1.31591e-10	4.9081e-09	268	464	58	64	242.409	474.198	62.932	61.2287	100	DOWN_AtMSCtrl_UP_AtC32I
AT2G03730	865.523	-1.51792	0.236295	-6.42384	1.32881e-10	4.93458e-09	489	444	1194	1328	442.306	453.759	1295.53	1270.5	100	UP_AtMSCtrl_DOWN_AtC32I
AT3G07280	359.37	-2.03983	0.317534	-6.42398	1.32757e-10	4.93458e-09	194	103	530	608	175.475	105.264	575.068	581.673	100	UP_AtMSCtrl_DOWN_AtC32I
AT1G62510	2085.34	-1.47754	0.230507	-6.40993	1.45585e-10	5.39457e-09	1089	1193	2981	3034	985.012	1219.22	3234.49	2902.62	100	UP_AtMSCtrl_DOWN_AtC32I
AT3G56150	2461.62	-1.45395	0.227217	-6.39896	1.56435e-10	5.78403e-09	1592	1167	3536	3530	1439.98	1192.65	3836.68	3377.15	100	UP_AtMSCtrl_DOWN_AtC32I
AT4G30790	966.748	-1.74065	0.272061	-6.39801	1.57412e-10	5.80751e-09	601	339	1399	1525	543.611	346.451	1517.96	1458.97	100	UP_AtMSCtrl_DOWN_AtC32I
AT1G60950	27254.9	1.36735	0.21375	6.39695	1.58506e-10	5.83523e-09	47771	34597	14226	15697	43209.4	35357.4	15435.7	15017.3	100	DOWN_AtMSCtrl_UP_AtC32I
AT2G05310	1960.53	1.39284	0.217817	6.39457	1.61002e-10	5.91429e-09	3226	2702	989	1139	2917.95	2761.39	1073.1	1089.68	100	DOWN_AtMSCtrl_UP_AtC32I
AT2G17930	1353.43	-1.65749	0.259277	-6.39272	1.6296e-10	5.97332e-09	847	525	1708	2360	766.121	536.539	1853.24	2257.81	100	UP_AtMSCtrl_DOWN_AtC32I
AT5G24165	1747.43	1.54747	0.242129	6.39112	1.64679e-10	6.02336e-09	2545	2844	737	1026	2301.98	2906.51	799.671	981.573	100	DOWN_AtMSCtrl_UP_AtC32I
AT1G14610	1285.04	-1.57054	0.245859	-6.38797	1.68106e-10	6.13551e-09	823	538	1789	1991	744.413	549.825	1941.13	1904.79	100	UP_AtMSCtrl_DOWN_AtC32I
AT2G27170	385.788	-1.81491	0.284371	-6.3822	1.74561e-10	6.35746e-09	209	149	531	654	189.043	152.275	576.153	625.681	100	UP_AtMSCtrl_DOWN_AtC32I
AT5G20700	6494.72	1.38652	0.217345	6.37937	1.7782e-10	6.4623e-09	9469	10007	3149	3941	8564.81	10226.9	3416.77	3770.35	100	DOWN_AtMSCtrl_UP_AtC32I
AT3G26560	713.783	-1.67445	0.262638	-6.3755	1.82362e-10	6.61325e-09	426	289	1080	1048	385.322	295.352	1171.84	1002.62	100	UP_AtMSCtrl_DOWN_AtC32I
AT2G17520	1660.3	-1.54192	0.241882	-6.37466	1.83364e-10	6.63544e-09	1081	704	2309	2549	977.776	719.473	2505.34	2438.63	100	UP_AtMSCtrl_DOWN_AtC32I
AT5G25070	486.96	-2.02639	0.318179	-6.36872	1.90606e-10	6.88288e-09	269	137	815	711	243.313	140.011	884.303	680.213	100	UP_AtMSCtrl_DOWN_AtC32I
AT4G26850	3320.61	1.36711	0.214913	6.36121	2.00172e-10	7.21297e-09	5249	4720	1818	1817	4747.78	4823.74	1972.59	1738.32	100	DOWN_AtMSCtrl_UP_AtC32I
AT1G78620	747.736	1.60364	0.252149	6.35991	2.0187e-10	7.25879e-09	1232	1112	303	430	1114.36	1136.44	328.765	411.38	100	DOWN_AtMSCtrl_UP_AtC32I
AT1G35660	221.544	-2.43255	0.382585	-6.35818	2.04164e-10	7.3258e-09	104	43	358	376	94.0691	43.9451	388.442	359.719	100	UP_AtMSCtrl_DOWN_AtC32I
AT1G64140	1048.36	-1.58844	0.249907	-6.35615	2.06879e-10	7.39201e-09	621	474	1631	1440	561.701	484.418	1769.69	1377.65	100	UP_AtMSCtrl_DOWN_AtC32I
AT1G64142	1048.36	-1.58844	0.249907	-6.35615	2.06879e-10	7.39201e-09	621	474	1631	1440	561.701	484.418	1769.69	1377.65	100	UP_AtMSCtrl_DOWN_AtC32I
AT4G08115	81.1939	-3.16299	0.497754	-6.35453	2.09066e-10	7.45451e-09	18	16	122	167	16.2812	16.3517	132.374	159.769	100	UP_AtMSCtrl_DOWN_AtC32I
AT5G10950	352.827	-1.97314	0.3107	-6.35064	2.14427e-10	7.62965e-09	124	171	509	598	112.159	174.758	552.283	572.106	100	UP_AtMSCtrl_DOWN_AtC32I
AT1G42970	27441.5	1.32866	0.209351	6.34657	2.2017e-10	7.81765e-09	40323	41132	14917	15754	36472.6	42036	16185.5	15071.8	100	DOWN_AtMSCtrl_UP_AtC32I
AT2G25510	28571.4	1.57611	0.248455	6.34365	2.24378e-10	7.93394e-09	57710	32665	13048	15204	52199.3	33382.9	14157.5	14545.6	100	DOWN_AtMSCtrl_UP_AtC32I
AT2G27080	178.25	2.34361	0.369427	6.34393	2.23984e-10	7.93394e-09	278	337	48	68	251.454	344.407	52.0817	65.0555	100	DOWN_AtMSCtrl_UP_AtC32I
AT1G80420	541.472	-1.70331	0.268584	-6.34184	2.27042e-10	8.01148e-09	297	235	679	962	268.64	240.165	736.739	920.344	100	UP_AtMSCtrl_DOWN_AtC32I
AT4G14130	205.431	-2.43028	0.383649	-6.33466	2.3787e-10	8.37616e-09	51	81	374	300	46.1301	82.7803	405.803	287.01	100	UP_AtMSCtrl_DOWN_AtC32I
AT2G33855	737.224	1.73486	0.27397	6.33231	2.41513e-10	8.48687e-09	1232	1129	250	428	1114.36	1153.81	271.259	409.467	100	DOWN_AtMSCtrl_UP_AtC32I
AT3G14990	4400.57	-1.49604	0.236597	-6.32317	2.56246e-10	8.98606e-09	2118	2634	5962	6821	1915.75	2691.89	6468.98	6525.64	100	UP_AtMSCtrl_DOWN_AtC32I
AT1G02660	888.721	-1.53119	0.242254	-6.32061	2.60525e-10	9.11732e-09	495	456	1317	1267	447.733	466.022	1428.99	1212.14	100	UP_AtMSCtrl_DOWN_AtC32I
AT5G07100	1575.07	-1.7342	0.274469	-6.31836	2.64362e-10	9.23259e-09	623	874	1959	2841	563.51	893.209	2125.58	2717.98	100	UP_AtMSCtrl_DOWN_AtC32I
AT3G20770	4431.93	-1.54045	0.243834	-6.31761	2.65632e-10	9.25794e-09	2957	1820	6502	6416	2674.64	1860	7054.9	6138.18	100	UP_AtMSCtrl_DOWN_AtC32I
AT1G32470	3761.5	1.32645	0.210008	6.31618	2.68116e-10	9.32538e-09	6018	5199	2024	2188	5443.35	5313.27	2196.11	2093.26	100	DOWN_AtMSCtrl_UP_AtC32I
AT1G03140	1478.29	-1.46146	0.231438	-6.31468	2.70727e-10	9.397e-09	859	781	2187	2054	776.975	798.165	2372.97	1965.06	100	UP_AtMSCtrl_DOWN_AtC32I
AT4G27720	437.979	1.80429	0.285906	6.31079	2.77614e-10	9.61642e-09	772	649	209	171	698.282	663.264	226.772	163.596	100	DOWN_AtMSCtrl_UP_AtC32I
AT1G62310	427.318	-2.50065	0.396467	-6.30734	2.83874e-10	9.81327e-09	213	62	686	741	192.661	63.3627	744.334	708.914	100	UP_AtMSCtrl_DOWN_AtC32I
AT4G16450	763.868	1.53301	0.243072	6.30684	2.84798e-10	9.82526e-09	1243	1122	343	431	1124.31	1146.66	372.167	412.337	100	DOWN_AtMSCtrl_UP_AtC32I
AT2G45910	683.812	-1.60057	0.253954	-6.3026	2.92701e-10	1.00562e-08	414	297	942	1082	374.468	303.528	1022.1	1035.15	100	UP_AtMSCtrl_DOWN_AtC32I
AT3G47610	702.655	-1.6379	0.259903	-6.30199	2.93857e-10	1.00562e-08	330	377	1037	1047	298.489	385.286	1125.18	1001.66	100	UP_AtMSCtrl_DOWN_AtC32I
AT4G08685	566.646	1.60809	0.255169	6.30207	2.93699e-10	1.00562e-08	983	800	255	296	889.134	817.583	276.684	283.183	100	DOWN_AtMSCtrl_UP_AtC32I
AT5G41080	655.112	-1.6851	0.267376	-6.30237	2.93127e-10	1.00562e-08	308	336	812	1168	278.589	343.385	881.048	1117.42	100	UP_AtMSCtrl_DOWN_AtC32I
AT5G43310	530.935	-1.76588	0.280399	-6.29774	3.02017e-10	1.03147e-08	315	193	752	863	284.921	197.242	815.946	825.631	100	UP_AtMSCtrl_DOWN_AtC32I
AT3G27160	3646.09	1.41476	0.224717	6.29572	3.05969e-10	1.04287e-08	5307	5681	1963	1932	4800.24	5805.86	2129.92	1848.34	100	DOWN_AtMSCtrl_UP_AtC32I
AT2G26920	460.781	-1.74993	0.278036	-6.29391	3.09564e-10	1.05301e-08	233	207	739	647	210.751	211.55	801.841	618.984	100	UP_AtMSCtrl_DOWN_AtC32I
AT5G14720	2435.1	-1.50459	0.23912	-6.29219	3.13017e-10	1.06263e-08	1625	1045	3225	3871	1469.83	1067.97	3499.24	3703.38	100	UP_AtMSCtrl_DOWN_AtC32I
AT4G18600	292.909	-2.07681	0.330357	-6.28657	3.24563e-10	1.09963e-08	154	83	413	522	139.295	84.8242	448.119	499.397	100	UP_AtMSCtrl_DOWN_AtC32I
AT1G24190	581.446	-1.95585	0.311243	-6.284	3.29965e-10	1.11572e-08	341	164	898	915	308.438	167.605	974.361	875.379	100	UP_AtMSCtrl_DOWN_AtC32I
AT1G29390	1278.47	1.46395	0.233006	6.2829	3.32308e-10	1.12141e-08	2124	1793	573	772	1921.18	1832.41	621.725	738.572	100	DOWN_AtMSCtrl_UP_AtC32I
AT5G51070	9934.29	-1.33524	0.212734	-6.27654	3.46185e-10	1.16592e-08	6700	5106	13700	14209	6060.22	5218.22	14865	13593.7	100	UP_AtMSCtrl_DOWN_AtC32I
AT1G80160	380.419	-2.09788	0.334501	-6.27168	3.57176e-10	1.20056e-08	109	186	580	631	98.5917	190.088	629.32	603.677	100	UP_AtMSCtrl_DOWN_AtC32I
AT2G20050	1231.09	-1.59916	0.255186	-6.26664	3.6891e-10	1.23756e-08	798	489	1673	1973	721.8	499.748	1815.26	1887.57	100	UP_AtMSCtrl_DOWN_AtC32I
AT3G05270	205.18	-2.20451	0.351957	-6.26357	3.7626e-10	1.2584e-08	97	57	330	331	87.7376	58.2528	358.061	316.667	100	UP_AtMSCtrl_DOWN_AtC32I
AT3G23070	380.774	-1.84686	0.294865	-6.26343	3.76603e-10	1.2584e-08	201	146	619	544	181.807	149.209	671.636	520.444	100	UP_AtMSCtrl_DOWN_AtC32I
AT4G12480	329.896	1.93684	0.309482	6.25833	3.89111e-10	1.29765e-08	479	600	123	146	433.261	613.187	133.459	139.678	100	DOWN_AtMSCtrl_UP_AtC32I
AT4G28740	617.754	1.5889	0.254288	6.24843	4.1459e-10	1.37453e-08	1019	913	262	347	921.697	933.067	284.279	331.974	100	DOWN_AtMSCtrl_UP_AtC32I
AT4G39710	1296.9	1.57103	0.251418	6.24866	4.13999e-10	1.37453e-08	1800	2205	575	713	1628.12	2253.46	623.895	682.126	100	DOWN_AtMSCtrl_UP_AtC32I
AT5G54080	7513.49	-1.36104	0.217803	-6.24895	4.13229e-10	1.37453e-08	4196	4527	10371	10849	3795.33	4626.5	11252.9	10379.2	100	UP_AtMSCtrl_DOWN_AtC32I
AT1G49410	220.749	2.09565	0.335525	6.24588	4.21429e-10	1.39449e-08	405	342	65	101	366.327	349.517	70.5273	96.6266	100	DOWN_AtMSCtrl_UP_AtC32I
AT3G23400	2408.81	1.40841	0.225542	6.24457	4.2498e-10	1.40351e-08	3987	3319	1337	1240	3606.29	3391.95	1450.69	1186.31	100	DOWN_AtMSCtrl_UP_AtC32I
AT2G42890	3356.45	-1.39115	0.222876	-6.24183	4.32477e-10	1.4255e-08	2212	1668	4803	4713	2000.78	1704.66	5211.42	4508.92	100	UP_AtMSCtrl_DOWN_AtC32I
AT5G06140	1687.31	-1.5011	0.240621	-6.23842	4.42006e-10	1.45409e-08	1100	750	2464	2419	994.962	766.484	2673.53	2314.25	100	UP_AtMSCtrl_DOWN_AtC32I
AT1G22060	539.812	-1.99922	0.320604	-6.23577	4.49552e-10	1.47606e-08	311	147	715	995	281.303	150.231	775.8	951.915	100	UP_AtMSCtrl_DOWN_AtC32I
AT2G40650	478.316	-1.81562	0.291292	-6.23297	4.57663e-10	1.49979e-08	186	250	678	788	168.239	255.495	735.653	753.879	100	UP_AtMSCtrl_DOWN_AtC32I
AT1G60640	148.595	-2.312	0.371417	-6.22482	4.82094e-10	1.57682e-08	57	47	225	262	51.5571	48.033	244.133	250.655	100	UP_AtMSCtrl_DOWN_AtC32I
AT2G03640	1420.14	-1.49349	0.239993	-6.22306	4.87565e-10	1.59165e-08	765	780	1716	2435	691.951	797.143	1861.92	2329.56	100	UP_AtMSCtrl_DOWN_AtC32I
AT5G64040	20856.8	1.31424	0.211232	6.2218	4.91475e-10	1.60134e-08	31956	29938	10114	13539	28904.6	30596	10974	12952.7	100	DOWN_AtMSCtrl_UP_AtC32I
AT5G41140	159.48	-2.29178	0.368633	-6.21698	5.06798e-10	1.64811e-08	52	60	250	270	47.0346	61.3187	271.259	258.309	100	UP_AtMSCtrl_DOWN_AtC32I
AT1G01320	4449.65	-1.45417	0.234055	-6.21293	5.20052e-10	1.68798e-08	3018	1985	6384	6390	2729.81	2028.63	6926.86	6113.31	100	UP_AtMSCtrl_DOWN_AtC32I
AT3G06850	1451.24	-1.40738	0.226587	-6.21122	5.25738e-10	1.70319e-08	850	803	1836	2324	768.834	820.649	1992.12	2223.37	100	UP_AtMSCtrl_DOWN_AtC32I
AT5G38880	510.259	-1.92659	0.310222	-6.21035	5.28682e-10	1.70947e-08	301	149	743	847	272.258	152.275	806.181	810.324	100	UP_AtMSCtrl_DOWN_AtC32I
AT4G01070	966.28	1.50238	0.24222	6.20253	5.55619e-10	1.79316e-08	1522	1448	509	477	1376.67	1479.83	552.283	456.345	100	DOWN_AtMSCtrl_UP_AtC32I
AT1G15125	24450	-1.83449	0.296009	-6.19743	5.73922e-10	1.84872e-08	8039	13842	40289	34146	7271.36	14146.2	43715	32667.4	100	UP_AtMSCtrl_DOWN_AtC32I
AT5G52050	234.433	2.00719	0.323979	6.19545	5.81205e-10	1.86865e-08	375	403	83	101	339.192	411.857	90.0579	96.6266	100	DOWN_AtMSCtrl_UP_AtC32I
AT5G06320	3320.63	1.47103	0.237515	6.19341	5.88754e-10	1.88935e-08	4845	5263	1833	1602	4382.36	5378.67	1988.87	1532.63	100	DOWN_AtMSCtrl_UP_AtC32I
AT1G55210	258.807	1.91965	0.310066	6.1911	5.97451e-10	1.91364e-08	424	426	98	115	383.513	435.363	106.333	110.02	100	DOWN_AtMSCtrl_UP_AtC32I
AT1G72440	451.162	-1.81885	0.293834	-6.19006	6.01413e-10	1.92271e-08	265	155	665	716	239.695	158.407	721.548	684.996	100	UP_AtMSCtrl_DOWN_AtC32I
AT1G08600	342.399	-1.82041	0.294125	-6.18922	6.04611e-10	1.92931e-08	187	130	469	584	169.144	132.857	508.881	558.712	100	UP_AtMSCtrl_DOWN_AtC32I
AT5G10150	984.473	-1.454	0.235007	-6.18704	6.13056e-10	1.9526e-08	552	542	1299	1542	499.29	553.912	1409.46	1475.23	100	UP_AtMSCtrl_DOWN_AtC32I
AT3G11964	350.207	-1.98819	0.3218	-6.17834	6.47779e-10	2.05933e-08	196	102	529	570	177.284	104.242	573.983	545.318	100	UP_AtMSCtrl_DOWN_AtC32I
AT3G23550	1633.86	-1.48903	0.241176	-6.17404	6.65683e-10	2.1123e-08	842	935	2008	2759	761.598	955.55	2178.75	2639.53	100	UP_AtMSCtrl_DOWN_AtC32I
AT5G06290	2842.32	1.31334	0.212901	6.1688	6.88113e-10	2.17941e-08	4508	3943	1459	1755	4077.54	4029.66	1583.07	1679.01	100	DOWN_AtMSCtrl_UP_AtC32I
AT5G38420	69550.7	1.26164	0.204553	6.16779	6.92505e-10	2.18924e-08	109689	95019	39706	40554	99214.9	97107.4	43082.4	38798	100	DOWN_AtMSCtrl_UP_AtC32I
AT4G14400	4171.58	1.67994	0.272723	6.15989	7.27969e-10	2.29709e-08	8956	4517	1833	2070	8100.8	4616.28	1988.87	1980.37	100	DOWN_AtMSCtrl_UP_AtC32I
AT2G40490	1593.61	1.38837	0.22544	6.1585	7.34358e-10	2.31296e-08	2527	2277	756	984	2285.7	2327.05	820.286	941.392	100	DOWN_AtMSCtrl_UP_AtC32I
AT4G29060	4567.62	-1.3791	0.223946	-6.15816	7.35945e-10	2.31367e-08	3009	2301	6676	6223	2721.67	2351.57	7243.69	5953.54	100	UP_AtMSCtrl_DOWN_AtC32I
AT4G27700	1410.38	1.44482	0.234834	6.1525	7.62732e-10	2.39346e-08	2522	1805	688	804	2281.18	1844.67	746.504	769.186	100	DOWN_AtMSCtrl_UP_AtC32I
AT1G15910	420.937	-1.95669	0.318243	-6.14842	7.82593e-10	2.45126e-08	235	129	708	597	212.56	131.835	768.205	571.149	100	UP_AtMSCtrl_DOWN_AtC32I
AT2G15042	597.536	-2.16329	0.35189	-6.14763	7.86491e-10	2.45894e-08	337	128	790	1147	304.82	130.813	857.177	1097.33	100	UP_AtMSCtrl_DOWN_AtC32I
AT5G16270	577.115	-1.57666	0.256589	-6.14472	8.01055e-10	2.49988e-08	339	267	762	943	306.629	272.868	826.796	902.167	100	UP_AtMSCtrl_DOWN_AtC32I
AT3G16250	1279.96	1.38977	0.22623	6.14318	8.08868e-10	2.51136e-08	2009	1848	634	759	1817.16	1888.62	687.912	726.134	100	DOWN_AtMSCtrl_UP_AtC32I
AT3G22170	1068.42	-1.56866	0.255332	-6.14363	8.06589e-10	2.51136e-08	697	437	1441	1707	630.444	446.605	1563.53	1633.08	100	UP_AtMSCtrl_DOWN_AtC32I
AT3G47960	738.74	1.66543	0.271105	6.14312	8.09164e-10	2.51136e-08	1449	916	300	400	1310.64	936.133	325.51	382.68	100	DOWN_AtMSCtrl_UP_AtC32I
AT4G35090	7014.09	-1.33265	0.217053	-6.13977	8.26426e-10	2.56026e-08	4569	3758	10131	9502	4132.71	3840.6	10992.5	9090.55	100	UP_AtMSCtrl_DOWN_AtC32I
AT4G04410	445.209	-1.82636	0.297563	-6.13773	8.37093e-10	2.5886e-08	262	151	607	764	236.982	154.319	658.616	730.918	100	UP_AtMSCtrl_DOWN_AtC32I
AT1G10320	162.899	-2.26618	0.369291	-6.13656	8.43267e-10	2.59354e-08	63	54	215	320	56.9842	55.1869	233.282	306.144	100	UP_AtMSCtrl_DOWN_AtC32I
AT2G31820	777.013	-1.5297	0.249261	-6.13694	8.41244e-10	2.59354e-08	469	367	1150	1109	424.216	375.066	1247.79	1060.98	100	UP_AtMSCtrl_DOWN_AtC32I
AT5G15970	2603.02	1.93547	0.315386	6.13682	8.41909e-10	2.59354e-08	2897	5513	896	1239	2620.37	5634.17	972.191	1185.35	100	DOWN_AtMSCtrl_UP_AtC32I
AT3G26060	4117.37	1.29355	0.210985	6.13102	8.73171e-10	2.68067e-08	6744	5477	2237	2451	6100.02	5597.38	2427.22	2344.87	100	DOWN_AtMSCtrl_UP_AtC32I
AT3G08530	4079.07	-1.53269	0.250062	-6.12926	8.82869e-10	2.70556e-08	2800	1622	5739	6166	2532.63	1657.65	6227.01	5899.01	100	UP_AtMSCtrl_DOWN_AtC32I
AT4G34630	348.534	1.7447	0.284808	6.12588	9.01813e-10	2.75864e-08	596	523	157	157	539.089	534.495	170.35	150.202	100	DOWN_AtMSCtrl_UP_AtC32I
AT1G01770	798.704	-1.47434	0.240926	-6.11948	9.38809e-10	2.85271e-08	485	398	1049	1266	438.688	406.748	1138.2	1211.18	100	UP_AtMSCtrl_DOWN_AtC32I
AT1G78380	2330.21	1.3742	0.224558	6.1196	9.38096e-10	2.85271e-08	3407	3566	1254	1290	3081.67	3644.38	1360.63	1234.14	100	DOWN_AtMSCtrl_UP_AtC32I
AT3G55330	2485.29	1.38564	0.226433	6.1194	9.39275e-10	2.85271e-08	4341	3193	1193	1523	3926.48	3263.18	1294.45	1457.05	100	DOWN_AtMSCtrl_UP_AtC32I
AT5G51010	1334.35	1.45743	0.23815	6.1198	9.36901e-10	2.85271e-08	2002	2057	595	814	1810.83	2102.21	645.596	778.753	100	DOWN_AtMSCtrl_UP_AtC32I
AT5G04220	576.741	-1.62946	0.2663	-6.1189	9.42257e-10	2.85667e-08	318	270	703	1025	287.634	275.934	762.779	980.616	100	UP_AtMSCtrl_DOWN_AtC32I
AT2G16510	1664.55	1.37837	0.225536	6.11154	9.86746e-10	2.98622e-08	2828	2202	884	931	2557.96	2250.4	959.171	890.687	100	DOWN_AtMSCtrl_UP_AtC32I
AT3G44200	354.337	-1.85201	0.303237	-6.10747	1.01224e-09	3.05795e-08	196	127	563	522	177.284	129.791	610.875	499.397	100	UP_AtMSCtrl_DOWN_AtC32I
AT3G12810	238.368	-2.12114	0.347526	-6.10354	1.03745e-09	3.12854e-08	122	66	386	373	110.35	67.4506	418.823	356.849	100	UP_AtMSCtrl_DOWN_AtC32I
AT1G62740	478.047	-1.78648	0.29285	-6.10033	1.05852e-09	3.18644e-08	193	250	747	702	174.571	255.495	810.521	671.603	100	UP_AtMSCtrl_DOWN_AtC32I
AT1G52342	353.4	1.74798	0.286897	6.0927	1.11021e-09	3.33613e-08	565	566	140	180	511.049	578.44	151.905	172.206	100	DOWN_AtMSCtrl_UP_AtC32I
AT4G01150	14676.2	1.31959	0.216663	6.09053	1.12536e-09	3.37567e-08	24983	18900	7142	9452	22597.4	19315.4	7749.32	9042.72	100	DOWN_AtMSCtrl_UP_AtC32I
AT1G08380	18663.9	1.2537	0.205873	6.08966	1.13149e-09	3.38633e-08	27618	27023	10365	11301	24980.8	27616.9	11246.4	10811.7	100	DOWN_AtMSCtrl_UP_AtC32I
AT2G31810	7191.03	-1.32192	0.217082	-6.08946	1.13289e-09	3.38633e-08	5009	3608	9453	10755	4530.7	3687.3	10256.8	10289.3	100	UP_AtMSCtrl_DOWN_AtC32I
AT3G02170	1848.25	-1.44387	0.237353	-6.0832	1.17808e-09	3.51522e-08	1201	881	2751	2531	1086.32	900.363	2984.93	2421.4	100	UP_AtMSCtrl_DOWN_AtC32I
AT4G02530	1857.76	1.42134	0.233749	6.08061	1.19724e-09	3.56615e-08	2630	2967	905	1085	2378.86	3032.21	981.956	1038.02	100	DOWN_AtMSCtrl_UP_AtC32I
AT2G27050	2623.79	-1.33041	0.218823	-6.07982	1.20318e-09	3.57757e-08	1691	1425	3699	3654	1529.53	1456.32	4013.54	3495.78	100	UP_AtMSCtrl_DOWN_AtC32I
AT5G38840	234.706	-1.92662	0.316936	-6.07891	1.20999e-09	3.59154e-08	111	93	358	371	100.401	95.044	388.442	354.935	100	UP_AtMSCtrl_DOWN_AtC32I
AT3G07780	3300.71	-1.72743	0.284357	-6.07486	1.24096e-09	3.67324e-08	1209	1927	5180	4724	1093.55	1969.35	5620.48	4519.45	100	UP_AtMSCtrl_DOWN_AtC32I
AT5G12860	3976.16	1.28722	0.211897	6.07475	1.24183e-09	3.67324e-08	6489	5296	2200	2337	5869.37	5412.4	2387.08	2235.81	100	DOWN_AtMSCtrl_UP_AtC32I
AT5G45930	582.43	1.55621	0.256197	6.07427	1.24551e-09	3.67771e-08	975	838	292	287	881.898	856.418	316.83	274.573	100	DOWN_AtMSCtrl_UP_AtC32I
AT2G01590	656.482	1.75994	0.28979	6.07313	1.25438e-09	3.6975e-08	862	1221	272	317	779.688	1247.84	295.129	303.274	100	DOWN_AtMSCtrl_UP_AtC32I
AT2G25735	510.98	1.70029	0.280017	6.07211	1.26238e-09	3.71463e-08	737	877	237	234	666.625	896.275	257.153	223.868	100	DOWN_AtMSCtrl_UP_AtC32I
AT1G52230	19387.9	1.49462	0.246423	6.06528	1.31725e-09	3.8694e-08	38301	22109	9671	10264	34643.7	22594.9	10493.4	9819.56	100	DOWN_AtMSCtrl_UP_AtC32I
AT1G61100	808.171	-1.59917	0.264448	-6.0472	1.47386e-09	4.32198e-08	491	350	1274	1096	444.115	357.693	1382.33	1048.54	100	UP_AtMSCtrl_DOWN_AtC32I
AT3G11560	3526.86	-1.56536	0.258977	-6.0444	1.49968e-09	4.39012e-08	2430	1335	4774	5608	2197.96	1364.34	5179.96	5365.17	100	UP_AtMSCtrl_DOWN_AtC32I
AT1G61620	889.944	-1.57318	0.260413	-6.04111	1.53058e-09	4.47286e-08	487	445	1432	1161	440.497	454.781	1553.77	1110.73	100	UP_AtMSCtrl_DOWN_AtC32I
AT1G68590	3207.32	1.42769	0.236353	6.04052	1.53622e-09	4.48166e-08	4362	5291	1639	1775	3945.48	5407.29	1778.37	1698.14	100	DOWN_AtMSCtrl_UP_AtC32I
AT3G21295	301.545	-2.06021	0.341155	-6.03893	1.55136e-09	4.51035e-08	167	80	443	515	151.053	81.7583	480.67	492.7	100	UP_AtMSCtrl_DOWN_AtC32I
AT5G55230	918.468	-1.56069	0.25843	-6.03912	1.54954e-09	4.51035e-08	430	530	1211	1494	388.94	541.649	1313.98	1429.31	100	UP_AtMSCtrl_DOWN_AtC32I
AT2G07080	1552.94	-1.44745	0.239712	-6.03829	1.55753e-09	4.52056e-08	1050	701	2105	2364	949.736	716.407	2284	2261.64	100	UP_AtMSCtrl_DOWN_AtC32I
AT2G37710	1215.56	1.4248	0.235976	6.03789	1.56145e-09	4.52421e-08	1921	1766	668	622	1737.57	1804.81	724.803	595.067	100	DOWN_AtMSCtrl_UP_AtC32I
AT2G01180	484.161	1.6284	0.269872	6.03398	1.59975e-09	4.6273e-08	773	748	197	271	699.187	764.44	213.752	259.265	100	DOWN_AtMSCtrl_UP_AtC32I
AT4G26450	425.821	-1.68673	0.279557	-6.03357	1.60377e-09	4.63105e-08	246	177	639	634	222.51	180.89	693.337	606.547	100	UP_AtMSCtrl_DOWN_AtC32I
AT4G04692	2804.62	1.28408	0.212985	6.02899	1.64986e-09	4.75607e-08	4273	4000	1494	1719	3864.98	4087.92	1621.04	1644.57	100	DOWN_AtMSCtrl_UP_AtC32I
AT1G13190	1303.8	-1.46699	0.243439	-6.0261	1.67967e-09	4.83381e-08	671	762	1885	1865	606.927	778.748	2045.29	1784.24	100	UP_AtMSCtrl_DOWN_AtC32I
AT1G17580	777.683	-1.6207	0.269322	-6.01769	1.76926e-09	5.08305e-08	501	303	1127	1176	453.16	309.66	1222.83	1125.08	100	UP_AtMSCtrl_DOWN_AtC32I
AT3G62010	1179.74	-1.5168	0.252258	-6.01289	1.82249e-09	5.22713e-08	789	497	1593	1849	713.659	507.923	1728.46	1768.94	100	UP_AtMSCtrl_DOWN_AtC32I
AT5G18130	2111.35	-1.30172	0.216658	-6.00821	1.87581e-09	5.37101e-08	1306	1229	2751	3160	1181.29	1256.01	2984.93	3023.17	100	UP_AtMSCtrl_DOWN_AtC32I
AT1G15340	1556.28	-2.10465	0.350674	-6.00172	1.95241e-09	5.58093e-08	368	824	2689	2229	332.86	842.111	2917.66	2132.48	100	UP_AtMSCtrl_DOWN_AtC32I
AT1G18020	716.67	-1.88332	0.313828	-6.00111	1.95974e-09	5.59249e-08	228	397	1042	1175	206.228	405.726	1130.61	1124.12	100	UP_AtMSCtrl_DOWN_AtC32I
AT2G38140	3901.64	1.26171	0.210312	5.99924	1.9824e-09	5.64769e-08	6294	5206	2095	2425	5692.99	5320.42	2273.15	2319.99	100	DOWN_AtMSCtrl_UP_AtC32I
AT1G26580	3274.26	-1.35184	0.225396	-5.99761	2.00242e-09	5.69517e-08	2162	1694	3900	5413	1955.55	1731.23	4231.64	5178.61	100	UP_AtMSCtrl_DOWN_AtC32I
AT3G49620	927.542	-2.17258	0.362335	-5.99607	2.02151e-09	5.73988e-08	202	481	1262	1742	182.711	491.572	1369.31	1666.57	100	UP_AtMSCtrl_DOWN_AtC32I
AT2G40770	229.923	-2.48118	0.414132	-5.99129	2.08185e-09	5.89152e-08	111	38	304	471	100.401	38.8352	329.851	450.605	100	UP_AtMSCtrl_DOWN_AtC32I
AT4G11010	1392.98	1.43966	0.240282	5.99155	2.07847e-09	5.89152e-08	1968	2242	667	812	1780.08	2291.28	723.718	776.839	100	DOWN_AtMSCtrl_UP_AtC32I
AT5G37190	203.229	-2.08694	0.34837	-5.99059	2.09079e-09	5.89721e-08	102	61	299	349	92.2601	62.3407	324.425	333.888	100	UP_AtMSCtrl_DOWN_AtC32I
AT5G44430	450.476	-2.41902	0.403791	-5.99077	2.08844e-09	5.89721e-08	75	212	679	816	67.8383	216.659	736.739	780.666	100	UP_AtMSCtrl_DOWN_AtC32I
AT4G16990	3525.01	-1.60442	0.267837	-5.99027	2.09496e-09	5.89918e-08	2420	1272	4625	5846	2188.92	1299.96	5018.29	5592.86	100	UP_AtMSCtrl_DOWN_AtC32I
AT1G13940	243.872	-2.04787	0.34221	-5.98424	2.17404e-09	6.11175e-08	126	74	406	361	113.968	75.6264	440.524	345.368	100	UP_AtMSCtrl_DOWN_AtC32I
AT1G33680	1691.1	-1.34544	0.22493	-5.98159	2.20966e-09	6.20164e-08	1034	954	2392	2361	935.264	974.968	2595.4	2258.77	100	UP_AtMSCtrl_DOWN_AtC32I
AT1G77180	3338.7	-1.47951	0.247378	-5.98075	2.22116e-09	6.22365e-08	1666	1975	5139	4446	1506.92	2018.41	5575.99	4253.48	100	UP_AtMSCtrl_DOWN_AtC32I
AT5G44260	1935.91	-1.35056	0.22586	-5.97962	2.23663e-09	6.25667e-08	1118	1145	2706	2745	1011.24	1170.17	2936.1	2626.14	100	UP_AtMSCtrl_DOWN_AtC32I
AT1G08800	496.779	-1.69734	0.284265	-5.97098	2.35835e-09	6.58634e-08	306	187	723	768	276.78	191.11	784.48	734.745	100	UP_AtMSCtrl_DOWN_AtC32I
AT2G36380	765.384	-1.77545	0.297507	-5.96776	2.40539e-09	6.7067e-08	490	243	1053	1283	443.21	248.341	1142.54	1227.44	100	UP_AtMSCtrl_DOWN_AtC32I
AT4G08580	318.628	-1.82569	0.305977	-5.96675	2.4202e-09	6.73695e-08	144	147	522	447	130.25	150.231	566.388	427.644	100	UP_AtMSCtrl_DOWN_AtC32I
AT2G15290	849.161	1.44156	0.241643	5.96567	2.43638e-09	6.7709e-08	1469	1129	421	478	1328.73	1153.81	456.8	457.302	100	DOWN_AtMSCtrl_UP_AtC32I
AT1G48350	3344.75	1.27958	0.214596	5.96274	2.48043e-09	6.88208e-08	4940	4900	1757	2087	4468.28	5007.7	1906.41	1996.63	100	DOWN_AtMSCtrl_UP_AtC32I
AT2G22400	1220.08	-1.5847	0.265792	-5.96219	2.48874e-09	6.89389e-08	813	474	1567	2049	735.367	484.418	1700.25	1960.28	100	UP_AtMSCtrl_DOWN_AtC32I
AT3G43720	511.59	1.59307	0.267307	5.95972	2.52663e-09	6.98746e-08	825	774	210	294	746.222	791.012	227.857	281.269	100	DOWN_AtMSCtrl_UP_AtC32I
AT1G36160	1955.71	-1.35091	0.22683	-5.95561	2.59106e-09	7.15402e-08	1336	973	2627	2895	1208.43	994.385	2850.39	2769.64	100	UP_AtMSCtrl_DOWN_AtC32I
AT5G44580	2767.39	1.44182	0.242237	5.95209	2.64732e-09	7.29751e-08	3711	4633	1326	1609	3356.64	4734.83	1438.76	1539.33	100	DOWN_AtMSCtrl_UP_AtC32I
AT1G60140	1902.36	-1.31487	0.221025	-5.94898	2.69821e-09	7.41458e-08	1157	1111	2394	2958	1046.52	1135.42	2597.57	2829.92	100	UP_AtMSCtrl_DOWN_AtC32I
AT2G25350	122.427	-2.46271	0.413989	-5.94873	2.70225e-09	7.41458e-08	49	30	205	201	44.321	30.6594	222.432	192.296	100	UP_AtMSCtrl_DOWN_AtC32I
AT3G16000	843.54	-1.56918	0.263786	-5.9487	2.70287e-09	7.41458e-08	533	360	1300	1164	482.104	367.912	1410.55	1113.6	100	UP_AtMSCtrl_DOWN_AtC32I
AT2G38440	920.133	-1.77726	0.298922	-5.94556	2.75514e-09	7.54581e-08	594	287	1401	1390	537.28	293.308	1520.13	1329.81	100	UP_AtMSCtrl_DOWN_AtC32I
AT1G29370	2037.64	-1.46666	0.246896	-5.94041	2.84307e-09	7.7741e-08	1380	897	3023	2828	1248.23	916.715	3280.06	2705.54	100	UP_AtMSCtrl_DOWN_AtC32I
AT3G19515	507.098	-1.72961	0.291203	-5.93954	2.85829e-09	7.80317e-08	292	201	838	679	264.117	205.418	909.259	649.599	100	UP_AtMSCtrl_DOWN_AtC32I
AT1G26770	211.817	2.18095	0.36759	5.93311	2.97249e-09	8.10194e-08	308	407	57	95	278.589	415.945	61.847	90.8864	100	DOWN_AtMSCtrl_UP_AtC32I
AT5G38520	1830.01	1.37211	0.231376	5.93022	3.02525e-09	8.23255e-08	2862	2634	833	1187	2588.71	2691.89	903.834	1135.6	100	DOWN_AtMSCtrl_UP_AtC32I
AT4G29610	119.219	3.07662	0.518845	5.92976	3.03386e-09	8.24279e-08	186	253	10	41	168.239	258.561	10.8503	39.2247	100	DOWN_AtMSCtrl_UP_AtC32I
AT5G53150	414.38	-1.87614	0.316667	-5.92465	3.1297e-09	8.48961e-08	245	130	537	753	221.605	132.857	582.664	720.394	100	UP_AtMSCtrl_DOWN_AtC32I
AT5G49930	290.889	-1.8119	0.305894	-5.92329	3.15555e-09	8.54612e-08	154	116	378	518	139.295	118.55	410.143	495.57	100	UP_AtMSCtrl_DOWN_AtC32I
AT1G01120	879.839	1.45192	0.245166	5.92219	3.17677e-09	8.5899e-08	1334	1341	469	453	1206.62	1370.47	508.881	433.385	100	DOWN_AtMSCtrl_UP_AtC32I
AT5G23820	606.415	1.69038	0.285454	5.92173	3.18566e-09	8.60028e-08	1236	718	260	305	1117.98	733.781	282.109	291.793	100	DOWN_AtMSCtrl_UP_AtC32I
AT3G50770	244.248	-1.89972	0.320978	-5.91855	3.24802e-09	8.75472e-08	102	112	329	432	92.2601	114.462	356.976	413.294	100	UP_AtMSCtrl_DOWN_AtC32I
AT4G25050	4474.45	1.2846	0.217135	5.91612	3.29627e-09	8.87072e-08	6454	6704	2501	2608	5837.71	6851.35	2713.67	2495.07	100	DOWN_AtMSCtrl_UP_AtC32I
AT1G72410	718.526	-1.71478	0.289896	-5.91515	3.31582e-09	8.90924e-08	460	249	1098	1058	416.075	254.473	1191.37	1012.19	100	UP_AtMSCtrl_DOWN_AtC32I
AT2G36145	821.97	1.49278	0.252679	5.90783	3.46635e-09	9.29901e-08	1424	1113	443	399	1288.02	1137.46	480.67	381.723	100	DOWN_AtMSCtrl_UP_AtC32I
AT1G77800	757.829	-1.78668	0.302595	-5.90453	3.5366e-09	9.47253e-08	488	234	1112	1196	441.401	239.143	1206.56	1144.21	100	UP_AtMSCtrl_DOWN_AtC32I
AT3G49140	1324.14	-1.57381	0.266797	-5.89891	3.65906e-09	9.78511e-08	891	514	1974	1906	805.919	525.297	2141.86	1823.47	100	UP_AtMSCtrl_DOWN_AtC32I
AT3G62030	6147.02	1.33192	0.22586	5.89709	3.69966e-09	9.87814e-08	11024	7462	3296	3569	9971.33	7626.01	3576.27	3414.46	100	DOWN_AtMSCtrl_UP_AtC32I
AT4G21105	958.961	1.57403	0.267059	5.89395	3.77069e-09	1.0052e-07	1330	1633	392	563	1203	1668.89	425.334	538.621	100	DOWN_AtMSCtrl_UP_AtC32I
AT4G39050	904.549	-1.6914	0.286999	-5.89341	3.78306e-09	1.00692e-07	596	309	1218	1507	539.089	315.791	1321.57	1441.75	100	UP_AtMSCtrl_DOWN_AtC32I
AT3G05625	257.388	1.87639	0.31851	5.89113	3.83555e-09	1.01771e-07	488	360	91	127	441.401	367.912	98.7382	121.501	100	DOWN_AtMSCtrl_UP_AtC32I
AT5G35200	1710.87	-1.30183	0.220972	-5.89138	3.82993e-09	1.01771e-07	1138	925	2223	2568	1029.33	945.33	2412.03	2456.8	100	UP_AtMSCtrl_DOWN_AtC32I
AT4G01800	3424.41	-1.26038	0.214037	-5.8886	3.89475e-09	1.0318e-07	2288	1922	4691	4781	2069.52	1964.24	5089.9	4573.98	100	UP_AtMSCtrl_DOWN_AtC32I
AT4G16410	1719.22	1.3118	0.222799	5.88782	3.91331e-09	1.03511e-07	2736	2375	964	971	2474.74	2427.2	1045.97	928.955	100	DOWN_AtMSCtrl_UP_AtC32I
AT5G24105	110.026	2.50593	0.425654	5.88725	3.92676e-09	1.03705e-07	189	199	28	37	170.953	203.374	30.381	35.3979	100	DOWN_AtMSCtrl_UP_AtC32I
AT1G52980	1149.04	-1.34958	0.229289	-5.88593	3.95832e-09	1.04377e-07	719	631	1583	1655	650.343	644.869	1717.61	1583.34	100	UP_AtMSCtrl_DOWN_AtC32I
AT1G33050	3484.25	-1.28888	0.219115	-5.88219	4.04872e-09	1.06595e-07	2390	1845	4281	5482	2161.78	1885.55	4645.03	5244.62	100	UP_AtMSCtrl_DOWN_AtC32I
AT2G40080	461.799	1.59609	0.271395	5.88107	4.07616e-09	1.07152e-07	744	700	191	263	672.956	715.385	207.242	251.612	100	DOWN_AtMSCtrl_UP_AtC32I
AT2G03420	478.367	1.60096	0.272285	5.87973	4.10944e-09	1.0786e-07	871	637	232	233	787.829	651	251.728	222.911	100	DOWN_AtMSCtrl_UP_AtC32I
AT5G19250	1933.96	1.42612	0.24275	5.87486	4.23203e-09	1.10907e-07	3616	2316	978	1084	3270.71	2366.9	1061.16	1037.06	100	DOWN_AtMSCtrl_UP_AtC32I
AT1G14840	282.49	-1.96927	0.335365	-5.87203	4.30493e-09	1.12643e-07	152	90	479	398	137.486	91.9781	519.732	380.766	100	UP_AtMSCtrl_DOWN_AtC32I
AT1G67080	514.927	1.55596	0.265234	5.86637	4.45447e-09	1.16377e-07	851	751	217	300	769.739	767.506	235.453	287.01	100	DOWN_AtMSCtrl_UP_AtC32I
AT3G21290	303.726	-1.95064	0.332909	-5.85936	4.64656e-09	1.2121e-07	175	89	450	499	158.289	90.9561	488.266	477.393	100	UP_AtMSCtrl_DOWN_AtC32I
AT1G55910	211.859	1.98268	0.338581	5.85585	4.74566e-09	1.23605e-07	419	291	73	96	378.99	297.396	79.2075	91.8431	100	DOWN_AtMSCtrl_UP_AtC32I
AT3G59410	459.675	-1.76158	0.300875	-5.85488	4.77353e-09	1.24141e-07	284	158	616	786	256.881	161.473	668.381	751.965	100	UP_AtMSCtrl_DOWN_AtC32I
AT3G62900	490.659	-1.662	0.284583	-5.84011	5.21663e-09	1.35457e-07	307	189	718	745	277.685	193.154	779.055	712.741	100	UP_AtMSCtrl_DOWN_AtC32I
AT1G13980	1237.28	-1.69086	0.289553	-5.83955	5.23434e-09	1.3571e-07	830	410	1852	1850	750.744	419.011	2009.48	1769.89	100	UP_AtMSCtrl_DOWN_AtC32I
AT1G67330	48.3502	9.0114	1.5436	5.83793	5.28533e-09	1.36823e-07	111	91	0	0	100.401	93.0001	0	0	100	DOWN_AtMSCtrl_UP_AtC32I
AT1G05410	342.935	-1.71154	0.293234	-5.83678	5.32207e-09	1.37565e-07	165	168	532	495	149.244	171.692	577.238	473.566	100	UP_AtMSCtrl_DOWN_AtC32I
AT3G54900	2394.09	1.26464	0.216924	5.82987	5.54709e-09	1.43164e-07	3764	3285	1364	1395	3404.58	3357.2	1479.99	1334.59	100	DOWN_AtMSCtrl_UP_AtC32I
AT1G06570	7938.75	-1.7455	0.299472	-5.82861	5.58922e-09	1.44033e-07	2649	4794	12290	11628	2396.05	4899.37	13335.1	11124.5	100	UP_AtMSCtrl_DOWN_AtC32I
AT2G44950	526.221	-1.69138	0.290209	-5.82814	5.60491e-09	1.44218e-07	335	190	734	848	303.011	194.176	796.415	811.281	100	UP_AtMSCtrl_DOWN_AtC32I
AT5G07460	363.939	1.67928	0.288434	5.82205	5.813e-09	1.49347e-07	659	502	174	165	596.073	513.033	188.796	157.855	100	DOWN_AtMSCtrl_UP_AtC32I
AT2G19110	269.615	-2.0853	0.358203	-5.82156	5.83013e-09	1.49561e-07	150	68	431	424	135.677	69.4946	467.65	405.64	100	UP_AtMSCtrl_DOWN_AtC32I
AT3G61820	598.02	1.65221	0.283826	5.8212	5.84255e-09	1.49654e-07	1060	837	321	240	958.782	855.396	348.296	229.608	100	DOWN_AtMSCtrl_UP_AtC32I
AT4G02510	9795.78	-1.37798	0.236795	-5.8193	5.90957e-09	1.51143e-07	6835	4603	14584	13037	6182.33	4704.17	15824.1	12472.5	100	UP_AtMSCtrl_DOWN_AtC32I
AT1G68910	295.917	-1.88343	0.323679	-5.81882	5.92647e-09	1.51347e-07	169	97	461	451	152.862	99.1319	500.201	431.471	100	UP_AtMSCtrl_DOWN_AtC32I
AT5G46330	941.337	-1.53415	0.263767	-5.81631	6.016e-09	1.53404e-07	634	384	1343	1403	573.46	392.44	1457.2	1342.25	100	UP_AtMSCtrl_DOWN_AtC32I
AT3G58160	116.76	-2.6262	0.451602	-5.8153	6.05241e-09	1.54101e-07	49	20	190	205	44.321	20.4396	206.157	196.123	100	UP_AtMSCtrl_DOWN_AtC32I
AT5G15350	505.899	1.54798	0.266343	5.81199	6.17342e-09	1.56947e-07	760	803	230	278	687.428	820.649	249.558	265.962	100	DOWN_AtMSCtrl_UP_AtC32I
AT1G48650	762.282	-1.59186	0.27417	-5.80609	6.39483e-09	1.62333e-07	507	294	1064	1187	458.587	300.462	1154.48	1135.6	100	UP_AtMSCtrl_DOWN_AtC32I
AT1G31173	158.314	2.36509	0.407452	5.80459	6.45221e-09	1.63337e-07	293	260	31	72	265.022	265.714	33.6361	68.8823	100	DOWN_AtMSCtrl_UP_AtC32I
AT5G42540	1130.91	-1.70648	0.293989	-5.80456	6.45357e-09	1.63337e-07	761	364	1618	1785	688.333	372	1755.59	1707.71	100	UP_AtMSCtrl_DOWN_AtC32I
AT1G24575	108.157	2.59802	0.448165	5.79703	6.75009e-09	1.70588e-07	163	219	31	29	147.435	223.813	33.6361	27.7443	100	DOWN_AtMSCtrl_UP_AtC32I
AT2G36740	265.077	-1.77692	0.306817	-5.79144	6.97842e-09	1.76096e-07	137	113	403	401	123.918	115.484	437.269	383.636	100	UP_AtMSCtrl_DOWN_AtC32I
AT5G61660	765.983	1.39912	0.241638	5.79015	7.03242e-09	1.77196e-07	1194	1117	399	428	1079.99	1141.55	432.929	409.467	100	DOWN_AtMSCtrl_UP_AtC32I
AT5G07020	3353.09	1.33603	0.230773	5.78936	7.06569e-09	1.77771e-07	4608	5322	1831	1901	4167.99	5438.97	1986.7	1818.68	100	DOWN_AtMSCtrl_UP_AtC32I
AT3G26220	693.703	-1.50837	0.260654	-5.78684	7.1722e-09	1.80184e-07	400	352	1075	927	361.804	359.737	1166.41	886.86	100	UP_AtMSCtrl_DOWN_AtC32I
AT5G61560	279.562	-1.75837	0.304438	-5.77578	7.65963e-09	1.92146e-07	152	115	375	477	137.486	117.528	406.888	456.345	100	UP_AtMSCtrl_DOWN_AtC32I
AT4G37925	1414.53	1.45743	0.252476	5.77257	7.80736e-09	1.95564e-07	1954	2329	767	709	1767.41	2380.19	832.222	678.299	100	DOWN_AtMSCtrl_UP_AtC32I
AT3G19840	414.096	-1.61642	0.280229	-5.76822	8.01122e-09	2.00375e-07	231	194	639	581	208.942	198.264	693.337	555.842	100	UP_AtMSCtrl_DOWN_AtC32I
AT1G73960	651.865	-1.55634	0.269936	-5.7656	8.13684e-09	2.02802e-07	426	270	852	1068	385.322	275.934	924.45	1021.75	100	UP_AtMSCtrl_DOWN_AtC32I
AT2G33440	125.297	-2.42551	0.420666	-5.76589	8.12294e-09	2.02802e-07	55	28	201	214	49.7481	28.6154	218.092	204.734	100	UP_AtMSCtrl_DOWN_AtC32I
AT3G10060	980.887	1.50053	0.260263	5.76545	8.14404e-09	2.02802e-07	1374	1621	421	593	1242.8	1656.63	456.8	567.322	100	DOWN_AtMSCtrl_UP_AtC32I
AT1G30320	398.543	-1.84669	0.320356	-5.76448	8.19099e-09	2.03527e-07	227	138	688	524	205.324	141.033	746.504	501.31	100	UP_AtMSCtrl_DOWN_AtC32I
AT1G56290	252.684	-1.86705	0.323896	-5.76435	8.1971e-09	2.03527e-07	125	102	420	353	113.064	104.242	455.715	337.715	100	UP_AtMSCtrl_DOWN_AtC32I
AT5G04040	1454.31	-1.42171	0.246659	-5.76385	8.22167e-09	2.0384e-07	968	690	2186	1949	875.567	705.165	2371.89	1864.61	100	UP_AtMSCtrl_DOWN_AtC32I
AT3G54010	476.264	-1.55052	0.269143	-5.76094	8.36455e-09	2.0708e-07	294	214	639	760	265.926	218.703	693.337	727.091	100	UP_AtMSCtrl_DOWN_AtC32I
AT1G28480	62.4423	3.28931	0.571082	5.75978	8.42238e-09	2.08209e-07	123	113	8	15	111.255	115.484	8.68028	14.3505	100	DOWN_AtMSCtrl_UP_AtC32I
AT1G70290	5373.81	-1.2829	0.222771	-5.75881	8.47079e-09	2.09102e-07	3734	2821	7666	7230	3377.44	2883	8317.88	6916.93	100	UP_AtMSCtrl_DOWN_AtC32I
AT1G26270	1229.91	-1.4036	0.243949	-5.75364	8.73418e-09	2.1498e-07	835	581	1761	1735	755.267	593.77	1910.75	1659.87	100	UP_AtMSCtrl_DOWN_AtC32I
AT5G15580	418.064	-1.59294	0.276856	-5.75367	8.73265e-09	2.1498e-07	223	210	632	596	201.706	214.616	685.742	570.193	100	UP_AtMSCtrl_DOWN_AtC32I
AT4G32350	218.456	-1.94506	0.338286	-5.74977	8.93676e-09	2.19648e-07	113	76	353	325	102.21	77.6704	383.017	310.927	100	UP_AtMSCtrl_DOWN_AtC32I
AT1G15140	919.06	1.47167	0.256123	5.74594	9.14133e-09	2.24352e-07	1343	1455	504	447	1214.76	1486.98	546.857	427.644	100	DOWN_AtMSCtrl_UP_AtC32I
AT3G16940	853.463	-1.65383	0.287884	-5.74479	9.2036e-09	2.25555e-07	574	297	1166	1386	519.189	303.528	1265.15	1325.98	100	UP_AtMSCtrl_DOWN_AtC32I
AT3G13710	47.6571	8.98849	1.56614	5.73926	9.50908e-09	2.32706e-07	65	129	0	0	58.7932	131.835	0	0	100	DOWN_AtMSCtrl_UP_AtC32I
AT2G46100	766.022	1.41246	0.246157	5.73805	9.57702e-09	2.34032e-07	1135	1175	384	439	1026.62	1200.83	416.653	419.991	100	DOWN_AtMSCtrl_UP_AtC32I
AT5G67370	924.187	1.53943	0.268326	5.73716	9.6278e-09	2.34935e-07	1655	1227	355	586	1496.97	1253.97	385.187	560.626	100	DOWN_AtMSCtrl_UP_AtC32I
AT4G19600	524.818	-1.47388	0.256928	-5.73653	9.66339e-09	2.35465e-07	316	264	712	806	285.825	269.802	772.545	771.099	100	UP_AtMSCtrl_DOWN_AtC32I
AT5G23060	5629.77	1.18443	0.206572	5.73374	9.82399e-09	2.39036e-07	8700	7602	3125	3648	7869.25	7769.08	3390.73	3490.04	100	DOWN_AtMSCtrl_UP_AtC32I
AT5G57990	1016.57	-1.4645	0.255509	-5.73172	9.94185e-09	2.41559e-07	689	448	1471	1452	623.208	457.846	1596.09	1389.13	100	UP_AtMSCtrl_DOWN_AtC32I
AT2G02570	983.346	-1.37373	0.239747	-5.72993	1.00471e-08	2.43767e-07	566	571	1225	1577	511.953	583.55	1329.17	1508.71	100	UP_AtMSCtrl_DOWN_AtC32I
AT3G48870	1224.63	-1.30359	0.227616	-5.72715	1.02133e-08	2.47096e-07	802	672	1656	1766	725.418	686.77	1796.82	1689.53	100	UP_AtMSCtrl_DOWN_AtC32I
AT4G33666	624.037	1.56256	0.272834	5.72716	1.02123e-08	2.47096e-07	1185	776	267	357	1071.85	793.056	289.704	341.541	100	DOWN_AtMSCtrl_UP_AtC32I
AT1G09970	5349.83	-1.23619	0.215913	-5.72543	1.03171e-08	2.49252e-07	3448	3188	7525	7168	3118.75	3258.07	8164.89	6857.62	100	UP_AtMSCtrl_DOWN_AtC32I
AT2G14680	278.785	-1.8042	0.315164	-5.72465	1.03646e-08	2.50043e-07	160	101	391	463	144.722	103.22	424.249	442.952	100	UP_AtMSCtrl_DOWN_AtC32I
AT4G15630	411.412	1.57822	0.275851	5.72127	1.0573e-08	2.5471e-07	678	606	207	197	613.258	619.319	224.602	188.47	100	DOWN_AtMSCtrl_UP_AtC32I
AT1G03680	8928.53	1.17524	0.205548	5.71761	1.0803e-08	2.59516e-07	13949	11875	5190	5571	12617	12136	5631.33	5329.77	100	DOWN_AtMSCtrl_UP_AtC32I
AT1G25540	569.22	-1.56484	0.273682	-5.71774	1.07953e-08	2.59516e-07	370	235	761	916	334.669	240.165	825.711	876.336	100	UP_AtMSCtrl_DOWN_AtC32I
AT2G20960	2106.02	-1.34559	0.235446	-5.71508	1.09654e-08	2.63047e-07	1185	1279	3062	2846	1071.85	1307.11	3322.38	2722.76	100	UP_AtMSCtrl_DOWN_AtC32I
AT4G13395	115.01	2.71875	0.475822	5.71379	1.10488e-08	2.64674e-07	151	257	34	25	136.581	262.649	36.8912	23.9175	100	DOWN_AtMSCtrl_UP_AtC32I
AT4G29750	509.781	-1.70736	0.29884	-5.71328	1.10822e-08	2.64888e-07	328	177	695	844	296.68	180.89	754.099	807.454	100	UP_AtMSCtrl_DOWN_AtC32I
AT4G30990	451.804	-1.95899	0.342891	-5.71317	1.10889e-08	2.64888e-07	276	117	597	826	249.645	119.572	647.766	790.233	100	UP_AtMSCtrl_DOWN_AtC32I
AT4G12880	579.092	1.44128	0.252328	5.71193	1.11699e-08	2.66339e-07	943	822	280	334	852.954	840.067	303.81	319.537	100	DOWN_AtMSCtrl_UP_AtC32I
AT5G03540	1473.43	-1.38409	0.242323	-5.71177	1.1181e-08	2.66339e-07	1035	681	1964	2227	936.169	695.968	2131.01	2130.57	100	UP_AtMSCtrl_DOWN_AtC32I
AT1G15780	701.765	-1.44871	0.253961	-5.70446	1.16711e-08	2.77625e-07	433	353	1041	967	391.653	360.759	1129.52	925.128	100	UP_AtMSCtrl_DOWN_AtC32I
AT3G25770	3807.26	1.36504	0.239482	5.69996	1.19832e-08	2.84652e-07	7098	4452	1899	2298	6420.22	4549.85	2060.48	2198.49	100	DOWN_AtMSCtrl_UP_AtC32I
AT2G31510	1068.41	-1.42353	0.249792	-5.69887	1.20606e-08	2.8609e-07	738	482	1442	1619	667.529	492.594	1564.62	1548.9	100	UP_AtMSCtrl_DOWN_AtC32I
AT1G58250	610.817	-1.79463	0.314976	-5.69767	1.21457e-08	2.87707e-07	397	183	850	1019	359.091	187.022	922.279	974.876	100	UP_AtMSCtrl_DOWN_AtC32I
AT3G62400	376.525	1.80139	0.316221	5.69662	1.22209e-08	2.89085e-07	638	581	115	220	577.078	593.77	124.779	210.474	100	DOWN_AtMSCtrl_UP_AtC32I
AT1G64770	1489.01	1.35409	0.237793	5.6944	1.2381e-08	2.92466e-07	2077	2351	794	850	1878.67	2402.67	861.518	813.194	100	DOWN_AtMSCtrl_UP_AtC32I
AT2G28450	829.801	-1.39011	0.244442	-5.68689	1.29375e-08	3.05188e-07	551	409	1130	1230	498.386	417.989	1226.09	1176.74	100	UP_AtMSCtrl_DOWN_AtC32I
AT2G35540	135.976	-2.26049	0.397577	-5.68567	1.30299e-08	3.06942e-07	54	44	242	196	48.8436	44.9671	262.578	187.513	100	UP_AtMSCtrl_DOWN_AtC32I
AT1G26220	282.335	1.71688	0.302215	5.68099	1.33914e-08	3.15022e-07	457	443	113	147	413.362	452.737	122.609	140.635	100	DOWN_AtMSCtrl_UP_AtC32I
AT4G22890	5106.29	1.26708	0.22307	5.68018	1.34551e-08	3.16084e-07	8766	6361	2570	3352	7928.94	6500.81	2788.54	3206.85	100	DOWN_AtMSCtrl_UP_AtC32I
AT1G48300	8436.77	-1.16789	0.205703	-5.67757	1.36619e-08	3.20499e-07	5932	4920	10842	12114	5365.56	5028.14	11763.9	11589.4	100	UP_AtMSCtrl_DOWN_AtC32I
AT2G04039	831.073	1.46936	0.258848	5.67655	1.37439e-08	3.21979e-07	1165	1359	377	494	1053.76	1388.87	409.058	472.609	100	DOWN_AtMSCtrl_UP_AtC32I
AT1G49160	135.823	-2.26384	0.399299	-5.66955	1.43176e-08	3.34496e-07	57	41	240	198	51.5571	41.9011	260.408	189.426	100	UP_AtMSCtrl_DOWN_AtC32I
AT1G76955	90.2611	2.85119	0.502875	5.66977	1.42986e-08	3.34496e-07	225	111	23	20	203.515	113.44	24.9558	19.134	100	DOWN_AtMSCtrl_UP_AtC32I
AT3G57660	212.555	-1.97063	0.347684	-5.66788	1.44574e-08	3.373e-07	115	67	331	333	104.019	68.4726	359.146	318.581	100	UP_AtMSCtrl_DOWN_AtC32I
AT5G27120	486.126	-1.60223	0.282772	-5.66614	1.46052e-08	3.40282e-07	313	194	681	757	283.112	198.264	738.909	724.221	100	UP_AtMSCtrl_DOWN_AtC32I
AT2G41210	206.494	-2.00941	0.354771	-5.66395	1.47932e-08	3.44189e-07	108	65	267	389	97.6872	66.4286	289.704	372.156	100	UP_AtMSCtrl_DOWN_AtC32I
AT1G12430	531.189	-1.51854	0.268169	-5.6626	1.491e-08	3.45972e-07	334	242	780	762	302.107	247.319	846.327	729.005	100	UP_AtMSCtrl_DOWN_AtC32I
AT3G25840	1156.59	-1.42145	0.251026	-5.66259	1.49105e-08	3.45972e-07	798	524	1450	1877	721.8	535.517	1573.3	1795.72	100	UP_AtMSCtrl_DOWN_AtC32I
AT4G36050	476.041	-1.61588	0.28538	-5.6622	1.49445e-08	3.4629e-07	305	188	687	722	275.876	192.132	745.419	690.737	100	UP_AtMSCtrl_DOWN_AtC32I
AT3G44020	361.579	1.73194	0.306164	5.6569	1.54129e-08	3.56657e-07	625	535	122	211	565.319	546.759	132.374	201.863	100	DOWN_AtMSCtrl_UP_AtC32I
AT1G24560	782.988	-1.46057	0.25826	-5.65544	1.55445e-08	3.59212e-07	483	389	1204	1036	436.879	397.55	1306.38	991.14	100	UP_AtMSCtrl_DOWN_AtC32I
AT2G41560	5563.31	-1.26294	0.223618	-5.64774	1.62569e-08	3.75167e-07	3992	2871	7755	7624	3610.81	2934.1	8414.44	7293.87	100	UP_AtMSCtrl_DOWN_AtC32I
AT1G76080	3492.41	1.37272	0.243195	5.64455	1.65615e-08	3.81162e-07	4636	5758	1930	1879	4193.31	5884.55	2094.12	1797.64	100	DOWN_AtMSCtrl_UP_AtC32I
AT5G52970	1171.57	1.3414	0.237641	5.64467	1.65495e-08	3.81162e-07	2046	1477	613	691	1850.63	1509.46	665.126	661.079	100	DOWN_AtMSCtrl_UP_AtC32I
AT5G15850	614.662	-1.59948	0.283381	-5.64426	1.65895e-08	3.81289e-07	286	344	977	824	258.69	351.561	1060.08	788.32	100	UP_AtMSCtrl_DOWN_AtC32I
AT1G79360	44.2769	-4.26802	0.756361	-5.64284	1.67271e-08	3.83933e-07	3	6	96	67	2.71353	6.13187	104.163	64.0988	100	UP_AtMSCtrl_DOWN_AtC32I
AT3G06070	1036.77	1.35994	0.241128	5.63991	1.70143e-08	3.89999e-07	1810	1318	556	585	1637.16	1346.97	603.279	559.669	100	DOWN_AtMSCtrl_UP_AtC32I
AT2G38870	219.591	1.99429	0.353701	5.63836	1.71681e-08	3.92994e-07	314	409	92	80	284.016	417.989	99.8232	76.5359	100	DOWN_AtMSCtrl_UP_AtC32I
AT2G26980	1771.47	-1.35635	0.24063	-5.63668	1.73362e-08	3.96308e-07	1002	1061	2064	2985	906.32	1084.32	2239.51	2855.75	100	UP_AtMSCtrl_DOWN_AtC32I
AT3G56090	510.805	1.51134	0.268141	5.63636	1.73685e-08	3.96514e-07	876	705	219	306	792.352	720.495	237.623	292.75	100	DOWN_AtMSCtrl_UP_AtC32I
AT1G53780	2061.36	-1.28756	0.228547	-5.6337	1.76386e-08	4.02142e-07	1378	1125	2423	3366	1246.42	1149.73	2629.04	3220.25	100	UP_AtMSCtrl_DOWN_AtC32I
AT1G70320	1616.41	-1.31263	0.233028	-5.63293	1.77173e-08	4.03107e-07	1134	812	2033	2513	1025.72	829.847	2205.88	2404.18	100	UP_AtMSCtrl_DOWN_AtC32I
AT5G56240	1060.7	-1.96434	0.348731	-5.63282	1.77284e-08	4.03107e-07	686	239	1662	1646	620.495	244.253	1803.33	1574.73	100	UP_AtMSCtrl_DOWN_AtC32I
AT3G27890	835.705	1.34816	0.239363	5.6323	1.77825e-08	4.03797e-07	1388	1120	428	500	1255.46	1144.62	464.395	478.349	100	DOWN_AtMSCtrl_UP_AtC32I
AT1G68020	923.556	-1.7065	0.303016	-5.63171	1.78435e-08	4.04643e-07	625	294	1390	1380	565.319	300.462	1508.2	1320.24	100	UP_AtMSCtrl_DOWN_AtC32I
AT2G43290	470.968	1.86211	0.330796	5.62918	1.81071e-08	4.10075e-07	605	910	224	171	547.229	930.001	243.048	163.596	100	DOWN_AtMSCtrl_UP_AtC32I
AT5G46800	989.051	1.30897	0.23259	5.62781	1.82509e-08	4.1278e-07	1514	1418	530	588	1369.43	1449.17	575.068	562.539	100	DOWN_AtMSCtrl_UP_AtC32I
AT3G19290	983.466	-1.34592	0.239221	-5.62626	1.84161e-08	4.15963e-07	565	587	1250	1533	511.049	599.902	1356.29	1466.62	100	UP_AtMSCtrl_DOWN_AtC32I
AT1G22882	277.209	-1.72673	0.306921	-5.62598	1.84456e-08	4.16078e-07	132	135	425	408	119.395	137.967	461.14	390.333	100	UP_AtMSCtrl_DOWN_AtC32I
AT1G72930	2360.17	1.5279	0.271676	5.62399	1.86597e-08	4.20235e-07	2896	4296	1184	1198	2619.46	4390.42	1284.68	1146.13	100	DOWN_AtMSCtrl_UP_AtC32I
AT4G11320	315.368	1.63297	0.290368	5.62381	1.86793e-08	4.20235e-07	509	483	137	166	460.396	493.616	148.65	158.812	100	DOWN_AtMSCtrl_UP_AtC32I
AT5G16010	1718.92	1.25578	0.223363	5.62216	1.88584e-08	4.23704e-07	2812	2253	973	1018	2543.48	2302.52	1055.74	973.919	100	DOWN_AtMSCtrl_UP_AtC32I
AT2G30800	411.36	-1.87525	0.333573	-5.62171	1.89073e-08	4.24242e-07	258	116	582	692	233.364	118.55	631.49	662.036	100	UP_AtMSCtrl_DOWN_AtC32I
AT2G06210	473.68	-1.50523	0.268172	-5.61293	1.98933e-08	4.45778e-07	298	219	647	731	269.544	223.813	702.017	699.347	100	UP_AtMSCtrl_DOWN_AtC32I
AT4G28710	671.801	-1.7877	0.318887	-5.60605	2.06993e-08	4.63229e-07	444	197	914	1142	401.603	201.33	991.722	1092.55	100	UP_AtMSCtrl_DOWN_AtC32I
AT3G56910	3835.83	1.3745	0.245311	5.60307	2.10586e-08	4.70447e-07	4977	6430	1875	2337	4501.75	6571.32	2034.44	2235.81	100	DOWN_AtMSCtrl_UP_AtC32I
AT5G57120	1075.73	-1.69542	0.302597	-5.60292	2.10772e-08	4.70447e-07	393	646	1685	1525	355.473	660.198	1828.28	1458.97	100	UP_AtMSCtrl_DOWN_AtC32I
AT1G74690	613.938	-1.46045	0.260992	-5.59576	2.19653e-08	4.89628e-07	381	303	917	843	344.619	309.66	994.977	806.497	100	UP_AtMSCtrl_DOWN_AtC32I
AT3G25150	1286.53	-1.27924	0.228689	-5.5938	2.2215e-08	4.94545e-07	878	692	1720	1859	794.161	707.209	1866.26	1778.5	100	UP_AtMSCtrl_DOWN_AtC32I
AT1G80810	121.775	-2.29766	0.41096	-5.59096	2.25819e-08	5.02055e-07	37	48	193	204	33.4669	49.055	209.412	195.167	100	UP_AtMSCtrl_DOWN_AtC32I
AT3G22380	8182.27	-1.26168	0.225686	-5.59043	2.26513e-08	5.02941e-07	5620	4451	12004	10528	5083.35	4548.83	13024.8	10072.1	100	UP_AtMSCtrl_DOWN_AtC32I
AT1G62390	1748.29	-1.45178	0.259927	-5.58534	2.33243e-08	5.1721e-07	1207	763	2687	2306	1091.74	779.77	2915.49	2206.15	100	UP_AtMSCtrl_DOWN_AtC32I
AT1G52360	822.47	-1.73897	0.3115	-5.58255	2.37016e-08	5.24891e-07	553	252	1258	1220	500.195	257.539	1364.97	1167.17	100	UP_AtMSCtrl_DOWN_AtC32I
AT3G18035	7022.27	-1.20764	0.216518	-5.57754	2.4395e-08	5.39545e-07	4343	4461	9631	9566	3928.29	4559.05	10450	9151.78	100	UP_AtMSCtrl_DOWN_AtC32I
AT1G14740	3625.93	-1.24609	0.223426	-5.5772	2.44423e-08	5.3989e-07	2326	2150	5221	4743	2103.89	2197.25	5664.97	4537.62	100	UP_AtMSCtrl_DOWN_AtC32I
AT2G39580	1156.01	-1.74682	0.313281	-5.57589	2.46268e-08	5.4326e-07	782	346	1449	2081	707.328	353.605	1572.22	1990.89	100	UP_AtMSCtrl_DOWN_AtC32I
AT5G07690	121.919	2.75094	0.493682	5.57229	2.51408e-08	5.53879e-07	336	118	30	32	303.916	120.593	32.551	30.6144	100	DOWN_AtMSCtrl_UP_AtC32I
AT2G17695	759.53	1.43288	0.257184	5.57141	2.52688e-08	5.55979e-07	1177	1128	327	487	1064.61	1152.79	354.806	465.912	100	DOWN_AtMSCtrl_UP_AtC32I
AT3G07740	214.62	-1.86915	0.335786	-5.56649	2.59929e-08	5.71172e-07	89	102	285	381	80.5015	104.242	309.235	364.502	100	UP_AtMSCtrl_DOWN_AtC32I
AT5G63610	693.086	-1.40128	0.251764	-5.56584	2.60899e-08	5.72564e-07	381	408	945	1030	344.619	416.967	1025.36	985.4	100	UP_AtMSCtrl_DOWN_AtC32I
AT5G47820	683.144	-1.52621	0.274338	-5.56326	2.64786e-08	5.80346e-07	464	278	899	1101	419.693	284.11	975.446	1053.33	100	UP_AtMSCtrl_DOWN_AtC32I
AT2G41520	331.022	-1.89	0.33978	-5.56242	2.66061e-08	5.81653e-07	202	96	518	503	182.711	98.11	562.048	481.22	100	UP_AtMSCtrl_DOWN_AtC32I
AT4G22830	317.226	1.66471	0.29928	5.56238	2.66126e-08	5.81653e-07	534	471	159	138	483.009	481.352	172.521	132.024	100	DOWN_AtMSCtrl_UP_AtC32I
AT5G05580	314.797	1.71172	0.307742	5.56219	2.66408e-08	5.81653e-07	609	405	125	166	550.847	413.901	135.629	158.812	100	DOWN_AtMSCtrl_UP_AtC32I
AT5G63190	6603.8	-1.21496	0.218457	-5.56157	2.67354e-08	5.82968e-07	3955	4282	8829	9284	3577.34	4376.11	9579.77	8881.99	100	UP_AtMSCtrl_DOWN_AtC32I
AT4G12917	192.313	1.92389	0.346018	5.56008	2.69647e-08	5.87217e-07	331	303	63	96	299.393	309.66	68.3572	91.8431	100	DOWN_AtMSCtrl_UP_AtC32I
AT2G43535	343.647	1.58033	0.284252	5.5596	2.70392e-08	5.88086e-07	549	522	165	173	496.577	533.473	179.031	165.509	100	DOWN_AtMSCtrl_UP_AtC32I
AT1G56330	1125.76	1.27977	0.230214	5.55907	2.71223e-08	5.89139e-07	1828	1503	589	705	1653.45	1536.03	639.085	674.473	100	DOWN_AtMSCtrl_UP_AtC32I
AT2G04780	485.094	1.65407	0.297594	5.55814	2.72665e-08	5.91516e-07	945	604	250	206	854.763	617.275	271.259	197.08	100	DOWN_AtMSCtrl_UP_AtC32I
AT4G23170	1150.7	1.29124	0.232451	5.55488	2.77797e-08	6.01881e-07	1921	1497	632	679	1737.57	1529.9	685.742	649.599	100	DOWN_AtMSCtrl_UP_AtC32I
AT3G58050	592.391	-1.75024	0.315271	-5.55153	2.83184e-08	6.12774e-07	394	182	849	947	356.377	186	921.194	905.994	100	UP_AtMSCtrl_DOWN_AtC32I
AT3G56860	2097.85	-1.2887	0.232183	-5.55036	2.85078e-08	6.16087e-07	1438	1112	2451	3444	1300.69	1136.44	2659.42	3294.87	100	UP_AtMSCtrl_DOWN_AtC32I
AT5G05960	90.8755	2.51877	0.453946	5.5486	2.8797e-08	6.21548e-07	167	155	26	27	151.053	158.407	28.2109	25.8309	100	DOWN_AtMSCtrl_UP_AtC32I
AT4G29790	495.569	-1.50474	0.271284	-5.54675	2.91036e-08	6.27369e-07	321	221	689	751	290.348	225.857	747.589	718.481	100	UP_AtMSCtrl_DOWN_AtC32I
AT5G62090	798.34	-1.34844	0.243198	-5.5446	2.94628e-08	6.34307e-07	523	418	1110	1138	473.059	427.187	1204.39	1088.72	100	UP_AtMSCtrl_DOWN_AtC32I
AT3G07050	328.884	-1.62453	0.293013	-5.54423	2.95257e-08	6.34859e-07	172	163	502	469	155.576	166.583	544.687	448.692	100	UP_AtMSCtrl_DOWN_AtC32I
AT3G20540	626.455	-1.51764	0.273801	-5.54285	2.97583e-08	6.39051e-07	424	259	855	972	383.513	264.693	927.705	929.911	100	UP_AtMSCtrl_DOWN_AtC32I
AT4G32760	5901.1	-1.24169	0.224165	-5.53917	3.03911e-08	6.51819e-07	4360	3005	7906	8374	3943.67	3071.05	8578.28	8011.4	100	UP_AtMSCtrl_DOWN_AtC32I
AT1G06830	106.389	2.3393	0.422401	5.5381	3.05768e-08	6.54152e-07	203	168	33	36	183.616	171.692	35.8061	34.4412	100	DOWN_AtMSCtrl_UP_AtC32I
AT1G30270	1014.37	-1.31626	0.23767	-5.53818	3.05629e-08	6.54152e-07	693	524	1291	1562	626.826	535.517	1400.78	1494.36	100	UP_AtMSCtrl_DOWN_AtC32I
AT2G25850	889.82	-1.4547	0.262821	-5.53495	3.11319e-08	6.6519e-07	622	380	1203	1362	562.606	388.352	1305.3	1303.02	100	UP_AtMSCtrl_DOWN_AtC32I
AT2G16380	837.966	-1.31323	0.237399	-5.53174	3.17071e-08	6.76631e-07	539	464	1128	1219	487.531	474.198	1223.92	1166.22	100	UP_AtMSCtrl_DOWN_AtC32I
AT3G21430	392.428	-1.79341	0.324272	-5.53057	3.19199e-08	6.80318e-07	249	123	596	598	225.223	125.703	646.681	572.106	100	UP_AtMSCtrl_DOWN_AtC32I
AT5G63060	75.7825	2.88741	0.522757	5.52342	3.32457e-08	7.07689e-07	152	127	11	25	137.486	129.791	11.9354	23.9175	100	DOWN_AtMSCtrl_UP_AtC32I
AT1G18500	2038.28	-1.24834	0.226285	-5.51667	3.45492e-08	7.34516e-07	1462	1069	2713	2921	1322.4	1092.5	2943.7	2794.52	100	UP_AtMSCtrl_DOWN_AtC32I
AT3G61740	229.556	-1.87964	0.340778	-5.51572	3.47346e-08	7.37536e-07	123	83	282	435	111.255	84.8242	305.98	416.164	100	UP_AtMSCtrl_DOWN_AtC32I
AT3G61060	3451.89	-1.1622	0.21077	-5.51409	3.50586e-08	7.43486e-07	2327	2113	4512	4858	2104.8	2159.44	4895.68	4647.64	100	UP_AtMSCtrl_DOWN_AtC32I
AT5G17870	2458.56	1.72667	0.31322	5.51264	3.53491e-08	7.48714e-07	2643	5051	998	1253	2390.62	5162.01	1082.86	1198.74	100	DOWN_AtMSCtrl_UP_AtC32I
AT2G36490	796.268	-1.41395	0.256518	-5.51211	3.54564e-08	7.50053e-07	547	366	1022	1262	494.767	374.044	1108.91	1207.35	100	UP_AtMSCtrl_DOWN_AtC32I
AT1G17110	601.898	-1.73746	0.315229	-5.51172	3.55342e-08	7.50765e-07	401	188	914	900	362.709	192.132	991.722	861.029	100	UP_AtMSCtrl_DOWN_AtC32I
AT1G68660	1125.64	1.35559	0.246021	5.51005	3.58735e-08	7.56992e-07	1565	1783	552	696	1415.56	1822.19	598.939	665.862	100	DOWN_AtMSCtrl_UP_AtC32I
AT5G11530	313.874	-1.65125	0.299694	-5.50978	3.59279e-08	7.57201e-07	188	130	460	474	170.048	132.857	499.116	453.475	100	UP_AtMSCtrl_DOWN_AtC32I
AT3G59820	399.383	-1.71543	0.311439	-5.50806	3.62812e-08	7.637e-07	257	137	548	659	232.459	140.011	594.599	630.465	100	UP_AtMSCtrl_DOWN_AtC32I
AT2G30020	381.181	1.69279	0.307383	5.50708	3.64826e-08	7.66783e-07	546	656	192	159	493.863	670.418	208.327	152.115	100	DOWN_AtMSCtrl_UP_AtC32I
AT2G44650	644.861	1.39552	0.253412	5.50691	3.65178e-08	7.66783e-07	1070	882	301	401	967.827	901.385	326.595	383.636	100	DOWN_AtMSCtrl_UP_AtC32I
AT4G17140	1529.26	-1.30924	0.237762	-5.50651	3.6602e-08	7.67605e-07	1091	755	1915	2384	986.821	771.594	2077.84	2280.77	100	UP_AtMSCtrl_DOWN_AtC32I
AT2G30362	35.7945	-8.66045	1.57388	-5.50263	3.74175e-08	7.83739e-07	0	0	72	68	0	0	78.1225	65.0555	100	UP_AtMSCtrl_DOWN_AtC32I
AT4G32620	416.271	-1.86348	0.338878	-5.49896	3.82043e-08	7.99237e-07	264	117	655	623	238.791	119.572	710.698	596.023	100	UP_AtMSCtrl_DOWN_AtC32I
AT5G64070	1954.11	-1.27795	0.232451	-5.49773	3.84718e-08	8.03843e-07	1411	984	2453	3003	1276.26	1005.63	2661.59	2872.97	100	UP_AtMSCtrl_DOWN_AtC32I
AT3G57520	21374.8	-1.16258	0.211517	-5.49639	3.87651e-08	8.08979e-07	15894	11765	27240	30880	14376.3	12023.6	29556.3	29542.9	100	UP_AtMSCtrl_DOWN_AtC32I
AT2G19310	880.688	1.378	0.250966	5.4908	4.00111e-08	8.33886e-07	1308	1332	400	569	1183.1	1361.28	434.014	544.362	100	DOWN_AtMSCtrl_UP_AtC32I
AT5G12140	1475.52	1.836	0.33439	5.4906	4.00567e-08	8.33886e-07	1516	3170	571	702	1371.24	3239.67	619.555	671.603	100	DOWN_AtMSCtrl_UP_AtC32I
AT3G19960	971.482	-1.49754	0.272797	-5.48956	4.02943e-08	8.37807e-07	688	385	1320	1503	622.304	393.462	1432.25	1437.92	100	UP_AtMSCtrl_DOWN_AtC32I
AT1G76710	226.072	-1.76147	0.321275	-5.48276	4.18734e-08	8.69575e-07	108	106	342	342	97.6872	108.33	371.082	327.191	100	UP_AtMSCtrl_DOWN_AtC32I
AT4G11280	695.587	1.41121	0.257604	5.47821	4.29651e-08	8.9116e-07	985	1107	339	410	890.943	1131.33	367.827	392.247	100	DOWN_AtMSCtrl_UP_AtC32I
AT4G24920	725.393	1.33249	0.243379	5.47495	4.37626e-08	9.06594e-07	1112	1048	388	422	1005.82	1071.03	420.993	403.727	100	DOWN_AtMSCtrl_UP_AtC32I
AT4G09650	8625.62	1.32524	0.242118	5.47355	4.41113e-08	9.12707e-07	11246	14177	4929	4697	10172.1	14488.6	5348.14	4493.61	100	DOWN_AtMSCtrl_UP_AtC32I
AT2G19480	3675.75	-1.2316	0.225149	-5.47015	4.49663e-08	9.28139e-07	2157	2388	4981	5129	1951.03	2440.49	5404.56	4906.91	100	UP_AtMSCtrl_DOWN_AtC32I
AT2G30390	1844.21	1.20364	0.220035	5.47022	4.49486e-08	9.28139e-07	2949	2423	1001	1199	2667.4	2476.25	1086.12	1147.08	100	DOWN_AtMSCtrl_UP_AtC32I
AT3G45290	191.466	-1.93674	0.354193	-5.46803	4.55073e-08	9.38168e-07	105	62	276	322	94.9736	63.3627	299.47	308.057	100	UP_AtMSCtrl_DOWN_AtC32I
AT1G65230	1646.92	1.24417	0.227603	5.4664	4.59275e-08	9.45685e-07	2780	2072	903	1020	2514.54	2117.54	979.786	975.833	100	DOWN_AtMSCtrl_UP_AtC32I
AT5G49100	301.426	1.61533	0.295598	5.46463	4.63868e-08	9.53986e-07	475	469	143	148	429.643	479.308	155.16	141.591	100	DOWN_AtMSCtrl_UP_AtC32I
AT5G55310	594.443	-1.73222	0.317027	-5.46396	4.65624e-08	9.56441e-07	393	190	737	1075	355.473	194.176	799.671	1028.45	100	UP_AtMSCtrl_DOWN_AtC32I
AT5G46180	1581.16	-1.27852	0.234008	-5.46356	4.66674e-08	9.57443e-07	1122	813	2189	2199	1014.86	830.869	2375.14	2103.78	100	UP_AtMSCtrl_DOWN_AtC32I
AT2G24090	4016.62	1.2954	0.237149	5.46237	4.69819e-08	9.62733e-07	5298	6481	2247	2313	4792.1	6623.44	2438.07	2212.84	100	DOWN_AtMSCtrl_UP_AtC32I
AT4G28040	295.491	-2.01393	0.368812	-5.46059	4.74553e-08	9.71263e-07	88	152	521	399	79.597	155.341	565.303	381.723	100	UP_AtMSCtrl_DOWN_AtC32I
AT2G16860	867.995	-1.3582	0.248758	-5.45993	4.76327e-08	9.73723e-07	565	453	1275	1165	511.049	462.956	1383.42	1114.55	100	UP_AtMSCtrl_DOWN_AtC32I
AT1G53035	104.69	2.64103	0.483877	5.45806	4.81374e-08	9.82857e-07	231	149	16	42	208.942	152.275	17.3606	40.1814	100	DOWN_AtMSCtrl_UP_AtC32I
AT1G03380	1615.3	-1.34215	0.246036	-5.45512	4.89402e-08	9.97173e-07	1150	770	2332	2199	1040.19	786.924	2530.3	2103.78	100	UP_AtMSCtrl_DOWN_AtC32I
AT5G67070	647.106	1.48229	0.271728	5.45506	4.89558e-08	9.97173e-07	1153	845	267	410	1042.9	863.572	289.704	392.247	100	DOWN_AtMSCtrl_UP_AtC32I
AT2G01110	3557.88	1.1732	0.215216	5.45125	5.0017e-08	1.01757e-06	5410	4859	2156	2125	4893.4	4965.79	2339.33	2032.99	100	DOWN_AtMSCtrl_UP_AtC32I
AT1G65390	90.9515	2.4602	0.45153	5.44859	5.07704e-08	1.03166e-06	172	149	26	29	155.576	152.275	28.2109	27.7443	100	DOWN_AtMSCtrl_UP_AtC32I
AT1G18730	1350.97	1.64579	0.302238	5.44533	5.17103e-08	1.04951e-06	1537	2647	594	694	1390.23	2705.18	644.511	663.949	100	DOWN_AtMSCtrl_UP_AtC32I
AT1G31730	1800.04	-1.37795	0.253067	-5.44501	5.18023e-08	1.05012e-06	1305	802	2583	2506	1180.39	819.627	2802.64	2397.49	100	UP_AtMSCtrl_DOWN_AtC32I
AT1G32210	279.68	1.73316	0.318517	5.44134	5.28802e-08	1.0707e-06	462	433	97	160	417.884	442.517	105.248	153.072	100	DOWN_AtMSCtrl_UP_AtC32I
AT2G10940	27500.8	1.17026	0.215118	5.44009	5.32528e-08	1.07696e-06	44072	35517	17100	15980	39863.6	36297.6	18554.1	15288	100	DOWN_AtMSCtrl_UP_AtC32I
AT5G65840	898.828	1.42079	0.261286	5.43767	5.39825e-08	1.09042e-06	1585	1158	518	435	1433.65	1183.45	562.048	416.164	100	DOWN_AtMSCtrl_UP_AtC32I
AT1G03550	281.691	-1.67385	0.307875	-5.43679	5.425e-08	1.09453e-06	166	116	372	475	150.149	118.55	403.633	454.432	100	UP_AtMSCtrl_DOWN_AtC32I
AT3G61770	200.786	1.82137	0.335058	5.43598	5.44968e-08	1.09582e-06	317	332	83	91	286.73	339.297	90.0579	87.0596	100	DOWN_AtMSCtrl_UP_AtC32I
AT5G05480	724.92	-1.40501	0.258473	-5.43582	5.45453e-08	1.09582e-06	475	357	1077	979	429.643	364.846	1168.58	936.608	100	UP_AtMSCtrl_DOWN_AtC32I
AT5G20490	759.371	-1.45668	0.267982	-5.43573	5.4572e-08	1.09582e-06	528	326	973	1224	477.582	333.165	1055.74	1171	100	UP_AtMSCtrl_DOWN_AtC32I
AT5G36940	375.04	1.54553	0.284311	5.43605	5.44735e-08	1.09582e-06	666	504	164	214	602.404	515.077	177.946	204.734	100	DOWN_AtMSCtrl_UP_AtC32I
AT5G59250	1194.64	1.24354	0.228785	5.4354	5.46737e-08	1.09657e-06	1779	1713	641	756	1609.12	1750.65	695.507	723.264	100	DOWN_AtMSCtrl_UP_AtC32I
AT4G24190	1651.81	-1.2946	0.238244	-5.43393	5.51267e-08	1.10435e-06	1202	808	2212	2398	1087.22	825.759	2400.1	2294.16	100	UP_AtMSCtrl_DOWN_AtC32I
AT4G39970	1416.94	1.31519	0.242281	5.42835	5.68767e-08	1.13807e-06	2127	2074	647	964	1923.89	2119.58	702.017	922.258	100	DOWN_AtMSCtrl_UP_AtC32I
AT4G36760	1608.05	-1.24115	0.228728	-5.42634	5.75204e-08	1.1496e-06	1151	852	2132	2307	1041.09	870.726	2313.29	2207.1	100	UP_AtMSCtrl_DOWN_AtC32I
AT1G17680	514.116	-1.6674	0.307476	-5.42287	5.86505e-08	1.16861e-06	345	176	681	863	312.056	179.868	738.909	825.631	100	UP_AtMSCtrl_DOWN_AtC32I
AT1G43560	854.199	1.37146	0.252907	5.42279	5.86758e-08	1.16861e-06	1528	1059	414	526	1382.09	1082.28	449.204	503.224	100	DOWN_AtMSCtrl_UP_AtC32I
AT5G48412	2372.4	1.22172	0.225293	5.42278	5.86779e-08	1.16861e-06	3324	3557	1362	1432	3006.59	3635.18	1477.82	1369.99	100	DOWN_AtMSCtrl_UP_AtC32I
AT3G63410	9783.42	1.11284	0.205582	5.41313	6.19337e-08	1.23201e-06	15350	12599	5707	6461	13884.2	12875.9	6192.29	6181.23	100	DOWN_AtMSCtrl_UP_AtC32I
AT3G28030	151.316	-2.10744	0.38939	-5.41216	6.22701e-08	1.23725e-06	76	44	252	228	68.7428	44.9671	273.429	218.127	100	UP_AtMSCtrl_DOWN_AtC32I
AT3G22550	180.006	2.05785	0.380308	5.41101	6.26712e-08	1.24377e-06	362	248	48	91	327.433	253.451	52.0817	87.0596	100	DOWN_AtMSCtrl_UP_AtC32I
AT2G19800	1386.03	-1.25368	0.231908	-5.40593	6.44721e-08	1.2776e-06	987	729	1850	1985	892.752	745.023	2007.31	1899.05	100	UP_AtMSCtrl_DOWN_AtC32I
AT3G22210	647.324	1.92557	0.356206	5.40578	6.45258e-08	1.2776e-06	687	1398	213	322	621.399	1428.73	231.112	308.057	100	DOWN_AtMSCtrl_UP_AtC32I
AT2G25170	654.856	-1.47955	0.27374	-5.40494	6.48316e-08	1.28216e-06	451	277	840	1063	407.934	283.088	911.429	1016.97	100	UP_AtMSCtrl_DOWN_AtC32I
AT1G76990	8143.14	-1.15712	0.214126	-5.4039	6.52072e-08	1.28809e-06	5068	5382	10392	11720	4584.06	5500.29	11275.7	11212.5	100	UP_AtMSCtrl_DOWN_AtC32I
AT3G15110	869.876	1.28243	0.237472	5.40036	6.65066e-08	1.31223e-06	1402	1172	451	548	1268.12	1197.76	489.351	524.271	100	DOWN_AtMSCtrl_UP_AtC32I
AT2G25650	256.218	-1.64885	0.305494	-5.39731	6.76493e-08	1.33323e-06	135	123	367	396	122.109	125.703	398.208	378.853	100	UP_AtMSCtrl_DOWN_AtC32I
AT1G78410	146.661	2.01544	0.373434	5.39703	6.77545e-08	1.33376e-06	258	232	48	67	233.364	237.099	52.0817	64.0988	100	DOWN_AtMSCtrl_UP_AtC32I
AT2G40430	514.447	-1.40898	0.261141	-5.3955	6.83346e-08	1.34355e-06	305	281	644	832	275.876	287.176	698.762	795.973	100	UP_AtMSCtrl_DOWN_AtC32I
AT4G16250	484.33	-1.43059	0.265156	-5.39527	6.84225e-08	1.34355e-06	296	251	604	792	267.735	256.517	655.361	757.705	100	UP_AtMSCtrl_DOWN_AtC32I
AT4G16880	118.576	2.39834	0.444541	5.39509	6.84889e-08	1.34355e-06	279	143	39	35	252.359	146.143	42.3164	33.4845	100	DOWN_AtMSCtrl_UP_AtC32I
AT1G08820	1175.51	-1.30291	0.241672	-5.39124	6.99746e-08	1.37111e-06	839	584	1601	1682	758.885	596.836	1737.14	1609.17	100	UP_AtMSCtrl_DOWN_AtC32I
AT5G45950	303.234	1.76263	0.326971	5.39079	7.0149e-08	1.37295e-06	623	365	141	129	563.51	373.022	152.99	123.414	100	DOWN_AtMSCtrl_UP_AtC32I
AT3G07610	246.621	-1.66242	0.308688	-5.38544	7.22659e-08	1.41276e-06	133	114	340	398	120.3	116.506	368.912	380.766	100	UP_AtMSCtrl_DOWN_AtC32I
AT3G50370	4148.56	-1.43364	0.266239	-5.3848	7.2526e-08	1.41621e-06	3060	1678	6193	5636	2767.8	1714.88	6719.62	5391.95	100	UP_AtMSCtrl_DOWN_AtC32I
AT2G40100	217.319	1.90504	0.353822	5.38418	7.27769e-08	1.41948e-06	439	283	69	113	397.08	289.22	74.8674	108.107	100	DOWN_AtMSCtrl_UP_AtC32I
AT3G61800	124.784	-2.23481	0.415338	-5.38069	7.42001e-08	1.44558e-06	58	34	213	189	52.4616	34.7473	231.112	180.816	100	UP_AtMSCtrl_DOWN_AtC32I
AT2G45000	687.488	-1.35417	0.251766	-5.37866	7.50408e-08	1.46029e-06	431	375	994	939	389.844	383.242	1078.52	898.34	100	UP_AtMSCtrl_DOWN_AtC32I
AT2G46820	13542.6	1.13072	0.210249	5.37798	7.53248e-08	1.46414e-06	18978	19591	7929	8759	17165.8	20021.6	8603.24	8379.73	100	DOWN_AtMSCtrl_UP_AtC32I
AT4G29380	1071.7	-1.48609	0.276512	-5.3744	7.68368e-08	1.49183e-06	775	417	1451	1657	700.996	426.165	1574.39	1585.25	100	UP_AtMSCtrl_DOWN_AtC32I
AT1G15980	2518.43	1.16666	0.217113	5.37353	7.72112e-08	1.49739e-06	3879	3386	1515	1527	3508.6	3460.42	1643.83	1460.88	100	DOWN_AtMSCtrl_UP_AtC32I
AT3G10030	1215.58	-1.26519	0.235488	-5.37263	7.75951e-08	1.50312e-06	740	743	1700	1661	669.338	759.33	1844.56	1589.08	100	UP_AtMSCtrl_DOWN_AtC32I
AT1G65960	7876.2	-1.27915	0.238322	-5.3673	7.99228e-08	1.54645e-06	5908	3766	11145	10682	5343.85	3848.77	12092.7	10219.5	100	UP_AtMSCtrl_DOWN_AtC32I
AT5G39210	452.355	1.81593	0.338365	5.36679	8.01489e-08	1.54906e-06	522	917	188	205	472.155	937.155	203.987	196.123	100	DOWN_AtMSCtrl_UP_AtC32I
AT4G38920	4932.44	1.1148	0.207754	5.36598	8.05108e-08	1.55429e-06	7307	6740	2836	3298	6609.26	6888.14	3077.16	3155.19	100	DOWN_AtMSCtrl_UP_AtC32I
AT4G26110	1534.74	-1.24749	0.232507	-5.36537	8.07831e-08	1.55778e-06	1071	832	2158	2068	968.731	850.286	2341.5	1978.45	100	UP_AtMSCtrl_DOWN_AtC32I
AT4G03520	9120.77	1.10051	0.205251	5.36177	8.24099e-08	1.58735e-06	14163	11810	5301	6116	12810.6	12069.6	5751.77	5851.17	100	DOWN_AtMSCtrl_UP_AtC32I
AT1G15820	42407.8	1.10839	0.206752	5.36099	8.27691e-08	1.59246e-06	59802	60463	24850	27997	54091.6	61791.9	26963.1	26784.7	100	DOWN_AtMSCtrl_UP_AtC32I
AT2G17820	420.43	-1.72824	0.322735	-5.35499	8.55607e-08	1.64431e-06	278	135	565	710	251.454	137.967	613.045	679.256	100	UP_AtMSCtrl_DOWN_AtC32I
AT2G46200	196.127	-1.77337	0.331392	-5.35128	8.73342e-08	1.6765e-06	98	87	279	318	88.6421	88.9122	302.725	304.23	100	UP_AtMSCtrl_DOWN_AtC32I
AT2G18750	1771.69	-1.23334	0.230548	-5.34958	8.81587e-08	1.69042e-06	1271	944	2441	2429	1149.63	964.748	2648.57	2323.82	100	UP_AtMSCtrl_DOWN_AtC32I
AT5G04190	442.308	-1.44177	0.269558	-5.34864	8.86195e-08	1.69734e-06	244	250	608	662	220.701	255.495	659.701	633.335	100	UP_AtMSCtrl_DOWN_AtC32I
AT5G11150	828.011	1.31146	0.245323	5.34585	8.99938e-08	1.72173e-06	1368	1099	474	457	1237.37	1123.15	514.306	437.211	100	DOWN_AtMSCtrl_UP_AtC32I
AT1G03580	314.838	-2.01307	0.37665	-5.34467	9.05796e-08	1.72904e-06	85	170	398	603	76.8834	173.736	431.844	576.889	100	UP_AtMSCtrl_DOWN_AtC32I
AT3G22980	299.391	-1.62122	0.30333	-5.34473	9.05509e-08	1.72904e-06	162	144	468	414	146.531	147.165	507.796	396.073	100	UP_AtMSCtrl_DOWN_AtC32I
AT2G02500	301.042	1.57329	0.294406	5.34393	9.09543e-08	1.73425e-06	470	466	138	160	425.12	476.242	149.735	153.072	100	DOWN_AtMSCtrl_UP_AtC32I
AT1G13350	611.403	-1.45749	0.272827	-5.34216	9.18459e-08	1.74929e-06	413	273	747	1027	373.563	279	810.521	982.53	100	UP_AtMSCtrl_DOWN_AtC32I
AT1G03830	85.2207	-2.51313	0.470515	-5.34123	9.23199e-08	1.75635e-06	29	24	151	132	26.2308	24.5275	163.84	126.284	100	UP_AtMSCtrl_DOWN_AtC32I
AT1G27730	1759.65	1.47668	0.276502	5.34056	9.26595e-08	1.76084e-06	2214	3107	976	838	2002.59	3175.29	1058.99	801.714	100	DOWN_AtMSCtrl_UP_AtC32I
AT5G07820	271.184	-1.69013	0.31651	-5.3399	9.29988e-08	1.76532e-06	158	111	424	385	142.913	113.44	460.055	368.329	100	UP_AtMSCtrl_DOWN_AtC32I
AT2G04700	2959.1	1.24942	0.234033	5.33864	9.36438e-08	1.77558e-06	5249	3507	1537	1920	4747.78	3584.08	1667.7	1836.86	100	DOWN_AtMSCtrl_UP_AtC32I
AT3G25495	134.891	-2.44082	0.457564	-5.33437	9.58753e-08	1.81587e-06	62	27	153	303	56.0797	27.5934	166.01	289.88	100	UP_AtMSCtrl_DOWN_AtC32I
AT1G32220	635.156	1.47962	0.277386	5.33415	9.59909e-08	1.81603e-06	1174	791	266	399	1061.9	808.385	288.619	381.723	100	DOWN_AtMSCtrl_UP_AtC32I
AT1G14650	1843.79	-1.1729	0.220028	-5.33068	9.78459e-08	1.84702e-06	1215	1142	2440	2573	1098.98	1167.1	2647.48	2461.59	100	UP_AtMSCtrl_DOWN_AtC32I
AT4G19530	2994.08	-1.50525	0.282365	-5.33086	9.77481e-08	1.84702e-06	2218	1089	4421	4244	2006.21	1112.93	4796.94	4060.23	100	UP_AtMSCtrl_DOWN_AtC32I
AT3G51820	2265.25	1.1969	0.224563	5.32989	9.82731e-08	1.85302e-06	3344	3214	1157	1564	3024.68	3284.64	1255.39	1496.28	100	DOWN_AtMSCtrl_UP_AtC32I
AT3G19800	1539.51	1.17986	0.221597	5.32436	1.01306e-07	1.90811e-06	2415	2043	858	998	2184.39	2087.9	930.96	954.785	100	DOWN_AtMSCtrl_UP_AtC32I
AT1G69670	147.445	-2.06921	0.388682	-5.32365	1.01706e-07	1.91352e-06	71	48	254	210	64.2203	49.055	275.599	200.907	100	UP_AtMSCtrl_DOWN_AtC32I
AT3G01660	335.212	1.52718	0.28688	5.32342	1.01836e-07	1.91385e-06	555	483	148	193	502.004	493.616	160.585	184.643	100	DOWN_AtMSCtrl_UP_AtC32I
AT5G42650	7053.87	1.15488	0.21706	5.32057	1.03445e-07	1.94194e-06	9733	10438	4169	4412	8803.61	10667.4	4523.51	4220.96	100	DOWN_AtMSCtrl_UP_AtC32I
AT2G35710	69.1804	2.81722	0.529602	5.31951	1.04047e-07	1.95109e-06	155	100	14	20	140.199	102.198	15.1905	19.134	100	DOWN_AtMSCtrl_UP_AtC32I
AT4G32420	551.981	-1.38999	0.261412	-5.31725	1.05348e-07	1.97331e-06	305	327	717	857	275.876	334.187	777.97	819.891	100	UP_AtMSCtrl_DOWN_AtC32I
AT1G75690	1737.78	1.27088	0.239043	5.31655	1.05753e-07	1.97871e-06	2616	2494	807	1213	2366.2	2548.82	875.623	1160.48	100	DOWN_AtMSCtrl_UP_AtC32I
AT1G04850	1168.24	-1.50424	0.283009	-5.31515	1.06569e-07	1.99179e-06	493	756	1601	1795	445.924	772.616	1737.14	1717.27	100	UP_AtMSCtrl_DOWN_AtC32I
AT5G02100	403.908	-1.48253	0.279133	-5.31121	1.08897e-07	2.03084e-06	210	231	555	614	189.947	236.077	602.194	587.413	100	UP_AtMSCtrl_DOWN_AtC32I
AT5G11450	1027.06	1.23229	0.232015	5.31124	1.08881e-07	2.03084e-06	1533	1463	559	648	1386.62	1495.15	606.534	619.941	100	DOWN_AtMSCtrl_UP_AtC32I
AT4G13930	821.6	1.27386	0.240076	5.30608	1.12006e-07	2.08652e-06	1350	1080	448	497	1221.09	1103.74	486.096	475.479	100	DOWN_AtMSCtrl_UP_AtC32I
AT1G02330	214.452	-1.74355	0.328722	-5.30401	1.13284e-07	2.10803e-06	103	102	278	375	93.1646	104.242	301.64	358.762	100	UP_AtMSCtrl_DOWN_AtC32I
AT1G78020	7109.18	1.14897	0.216686	5.30247	1.14248e-07	2.12364e-06	9908	10408	4287	4376	8961.89	10636.8	4651.54	4186.51	100	DOWN_AtMSCtrl_UP_AtC32I
AT4G02480	5520	-1.23123	0.232232	-5.3017	1.14728e-07	2.13023e-06	4217	2721	7259	7953	3814.32	2780.8	7876.27	7608.63	100	UP_AtMSCtrl_DOWN_AtC32I
AT2G29450	662.49	1.3746	0.259318	5.30085	1.15267e-07	2.13791e-06	1018	970	382	338	920.792	991.319	414.483	323.364	100	DOWN_AtMSCtrl_UP_AtC32I
AT3G26890	2351.09	-1.35418	0.255663	-5.29676	1.17875e-07	2.18302e-06	1767	1023	2964	3705	1598.27	1045.48	3216.04	3544.57	100	UP_AtMSCtrl_DOWN_AtC32I
AT5G09880	597.342	-1.43849	0.271585	-5.29664	1.17956e-07	2.18302e-06	382	292	689	1043	345.523	298.418	747.589	997.837	100	UP_AtMSCtrl_DOWN_AtC32I
AT3G29000	39.8478	4.40878	0.832448	5.29616	1.18265e-07	2.18636e-06	53	102	4	3	47.9391	104.242	4.34014	2.8701	100	DOWN_AtMSCtrl_UP_AtC32I
AT5G47480	1110.53	-1.20911	0.228384	-5.29421	1.19531e-07	2.20737e-06	736	661	1448	1599	665.72	675.528	1571.13	1529.76	100	UP_AtMSCtrl_DOWN_AtC32I
AT1G31930	673.977	-1.62445	0.30703	-5.29083	1.21761e-07	2.2461e-06	466	233	1047	941	421.502	238.121	1136.03	900.254	100	UP_AtMSCtrl_DOWN_AtC32I
AT1G24170	966.291	1.27781	0.241665	5.28751	1.23995e-07	2.28485e-06	1440	1403	566	538	1302.5	1433.84	614.13	514.704	100	DOWN_AtMSCtrl_UP_AtC32I
AT2G19950	299.775	-1.56511	0.296028	-5.28704	1.24314e-07	2.28823e-06	161	154	385	500	145.626	157.385	417.738	478.349	100	UP_AtMSCtrl_DOWN_AtC32I
AT5G16210	626.216	-1.50088	0.28391	-5.28646	1.24708e-07	2.293e-06	440	250	881	936	397.985	255.495	955.916	895.47	100	UP_AtMSCtrl_DOWN_AtC32I
AT5G42070	354.68	1.50087	0.283941	5.28584	1.25132e-07	2.29832e-06	551	538	181	182	498.386	549.825	196.391	174.119	100	DOWN_AtMSCtrl_UP_AtC32I
AT4G38970	45070.9	1.1585	0.219197	5.2852	1.25564e-07	2.30377e-06	62290	66699	27821	26748	56342	68165	30186.7	25589.8	100	DOWN_AtMSCtrl_UP_AtC32I
AT5G27390	435.056	1.5666	0.296459	5.28439	1.26127e-07	2.3116e-06	683	669	161	276	617.781	683.704	174.691	264.049	100	DOWN_AtMSCtrl_UP_AtC32I
AT3G45050	397.093	1.58016	0.299059	5.28377	1.26551e-07	2.31524e-06	582	650	154	241	526.425	664.286	167.095	230.564	100	DOWN_AtMSCtrl_UP_AtC32I
AT5G10760	315.665	1.61492	0.305642	5.2837	1.26598e-07	2.31524e-06	606	395	141	165	548.134	403.682	152.99	157.855	100	DOWN_AtMSCtrl_UP_AtC32I
AT5G10940	678.516	-1.40492	0.26611	-5.27947	1.29557e-07	2.36682e-06	463	318	816	1134	418.789	324.989	885.388	1084.9	100	UP_AtMSCtrl_DOWN_AtC32I
AT3G24880	327.004	-1.53977	0.291795	-5.27691	1.3138e-07	2.39755e-06	197	153	481	472	178.189	156.363	521.902	451.562	100	UP_AtMSCtrl_DOWN_AtC32I
AT4G30935	234.023	-1.85633	0.351872	-5.2756	1.32325e-07	2.41219e-06	140	74	306	420	126.632	75.6264	332.021	401.814	100	UP_AtMSCtrl_DOWN_AtC32I
AT2G02130	839.714	1.44912	0.274925	5.27094	1.35724e-07	2.47151e-06	1139	1398	355	538	1030.24	1428.73	385.187	514.704	100	DOWN_AtMSCtrl_UP_AtC32I
AT5G22080	1524.11	-1.2445	0.236144	-5.27012	1.36338e-07	2.48004e-06	890	983	2086	2115	805.015	1004.61	2263.38	2023.42	100	UP_AtMSCtrl_DOWN_AtC32I
AT1G71820	949.101	-1.36486	0.25912	-5.26728	1.3846e-07	2.51529e-06	682	435	1176	1525	616.876	444.561	1276	1458.97	100	UP_AtMSCtrl_DOWN_AtC32I
AT2G21185	103.74	2.25748	0.428597	5.26713	1.38572e-07	2.51529e-06	192	166	29	42	173.666	169.648	31.466	40.1814	100	DOWN_AtMSCtrl_UP_AtC32I
AT1G17090	48.3997	3.34382	0.63493	5.26644	1.39096e-07	2.52211e-06	101	83	9	8	91.3556	84.8242	9.76531	7.65359	100	DOWN_AtMSCtrl_UP_AtC32I
AT4G04750	120.678	2.337	0.443837	5.26546	1.39842e-07	2.53295e-06	284	143	32	47	256.881	146.143	34.7211	44.9648	100	DOWN_AtMSCtrl_UP_AtC32I
AT4G20150	1628.45	1.19212	0.226432	5.26479	1.40348e-07	2.5394e-06	2352	2352	868	1088	2127.41	2403.69	941.81	1040.89	100	DOWN_AtMSCtrl_UP_AtC32I
AT1G35680	4873.6	1.25364	0.238316	5.26041	1.43736e-07	2.59794e-06	6360	7810	2831	2810	5752.69	7981.65	3071.73	2688.32	100	DOWN_AtMSCtrl_UP_AtC32I
AT1G17145	633.084	-1.31843	0.250754	-5.25787	1.45733e-07	2.62897e-06	426	332	824	955	385.322	339.297	894.069	913.647	100	UP_AtMSCtrl_DOWN_AtC32I
AT1G51060	632.127	1.30797	0.248767	5.25783	1.45762e-07	2.62897e-06	962	911	330	386	870.14	931.023	358.061	369.286	100	DOWN_AtMSCtrl_UP_AtC32I
AT4G04330	971.375	1.25154	0.238243	5.25322	1.49467e-07	2.69093e-06	1415	1425	554	573	1279.88	1456.32	601.109	548.188	100	DOWN_AtMSCtrl_UP_AtC32I
AT5G37360	1328.34	1.18516	0.22561	5.25316	1.49513e-07	2.69093e-06	2089	1762	772	821	1889.52	1800.73	837.647	785.45	100	DOWN_AtMSCtrl_UP_AtC32I
AT3G55040	1102.33	1.26765	0.241414	5.25094	1.51321e-07	2.72059e-06	1911	1357	578	697	1728.52	1386.83	627.15	666.819	100	DOWN_AtMSCtrl_UP_AtC32I
AT3G08610	2016.57	1.13725	0.216686	5.2484	1.53422e-07	2.75544e-06	3019	2754	1179	1298	2730.72	2814.53	1279.26	1241.8	100	DOWN_AtMSCtrl_UP_AtC32I
AT3G10080	169.597	2.07667	0.395823	5.24646	1.55046e-07	2.78166e-06	331	244	41	89	299.393	249.363	44.4864	85.1462	100	DOWN_AtMSCtrl_UP_AtC32I
AT1G50200	3695.58	-1.12303	0.214161	-5.24386	1.5725e-07	2.81824e-06	2731	2134	4769	5181	2470.22	2180.9	5174.53	4956.66	100	UP_AtMSCtrl_DOWN_AtC32I
AT5G62280	410.95	-1.6189	0.308796	-5.24261	1.58321e-07	2.83444e-06	170	245	602	613	153.767	250.385	653.191	586.456	100	UP_AtMSCtrl_DOWN_AtC32I
AT3G26590	371.795	1.49353	0.284899	5.24233	1.58563e-07	2.83579e-06	653	496	166	219	590.646	506.901	180.116	209.517	100	DOWN_AtMSCtrl_UP_AtC32I
AT3G61570	124.631	-2.06165	0.393484	-5.23949	1.61022e-07	2.87674e-06	49	51	181	215	44.321	52.1209	196.391	205.69	100	UP_AtMSCtrl_DOWN_AtC32I
AT4G22470	108.128	2.46772	0.471062	5.23863	1.6177e-07	2.88707e-06	164	213	41	23	148.34	217.681	44.4864	22.0041	100	DOWN_AtMSCtrl_UP_AtC32I
AT3G04560	463.346	-1.43147	0.273429	-5.23526	1.64757e-07	2.93731e-06	246	273	649	677	222.51	279	704.187	647.685	100	UP_AtMSCtrl_DOWN_AtC32I
AT1G60600	585.772	1.42513	0.272232	5.23497	1.65011e-07	2.93875e-06	1068	725	320	302	966.018	740.935	347.211	288.923	100	DOWN_AtMSCtrl_UP_AtC32I
AT5G21160	3270.48	-1.12118	0.214209	-5.23405	1.65839e-07	2.94733e-06	2144	2134	4125	4689	1939.27	2180.9	4475.77	4485.96	100	UP_AtMSCtrl_DOWN_AtC32I
AT5G64770	1767.2	1.23396	0.235753	5.23413	1.65765e-07	2.94733e-06	2404	2726	931	1148	2174.44	2785.91	1010.17	1098.29	100	DOWN_AtMSCtrl_UP_AtC32I
AT3G48190	341.249	-1.70951	0.32663	-5.23378	1.66082e-07	2.94856e-06	223	115	448	585	201.706	117.528	486.096	559.669	100	UP_AtMSCtrl_DOWN_AtC32I
AT1G22140	185.158	1.77082	0.338386	5.23314	1.66658e-07	2.95262e-06	318	279	78	87	287.634	285.132	84.6327	83.2328	100	DOWN_AtMSCtrl_UP_AtC32I
AT5G50230	497.545	-1.36354	0.260552	-5.23328	1.66532e-07	2.95262e-06	323	259	665	744	292.157	264.693	721.548	711.784	100	UP_AtMSCtrl_DOWN_AtC32I
AT1G43670	3908.44	1.14703	0.219244	5.23174	1.67918e-07	2.97186e-06	6081	5157	2029	2782	5500.33	5270.34	2201.54	2661.54	100	DOWN_AtMSCtrl_UP_AtC32I
AT5G14270	1138.66	-1.26624	0.242365	-5.22453	1.74598e-07	3.08686e-06	832	572	1492	1671	752.553	584.572	1618.87	1598.64	100	UP_AtMSCtrl_DOWN_AtC32I
AT5G24740	595.953	-1.76121	0.337314	-5.22129	1.77682e-07	3.13813e-06	401	176	705	1125	362.709	179.868	764.949	1076.29	100	UP_AtMSCtrl_DOWN_AtC32I
AT1G32990	3195.86	1.14944	0.220351	5.21641	1.8242e-07	3.2182e-06	4465	4670	1908	1988	4038.64	4772.64	2070.25	1901.92	100	DOWN_AtMSCtrl_UP_AtC32I
AT4G12800	60580.1	1.15574	0.221574	5.21605	1.82784e-07	3.2182e-06	80198	92675	35500	38204	72540	94711.9	38518.7	36549.7	100	DOWN_AtMSCtrl_UP_AtC32I
AT4G35830	11509.6	-1.13471	0.217541	-5.21606	1.82769e-07	3.2182e-06	8848	6265	14457	16668	8003.11	6402.7	15686.3	15946.3	100	UP_AtMSCtrl_DOWN_AtC32I
AT1G18160	1321.38	-1.3475	0.258549	-5.21178	1.87042e-07	3.28978e-06	987	585	1712	2025	892.752	597.858	1857.58	1937.32	100	UP_AtMSCtrl_DOWN_AtC32I
AT2G39570	13009	-1.10786	0.21261	-5.21077	1.88061e-07	3.30428e-06	9850	7419	17044	17823	8909.43	7582.06	18493.3	17051.2	100	UP_AtMSCtrl_DOWN_AtC32I
AT1G70210	152.953	2.03179	0.390114	5.2082	1.90681e-07	3.34686e-06	307	209	67	50	277.685	213.594	72.6973	47.8349	100	DOWN_AtMSCtrl_UP_AtC32I
AT1G69220	1170.04	-1.25506	0.241018	-5.20733	1.9158e-07	3.35916e-06	709	725	1373	1890	641.298	740.935	1489.75	1808.16	100	UP_AtMSCtrl_DOWN_AtC32I
AT5G09650	2589.42	1.12766	0.216579	5.20667	1.92258e-07	3.36758e-06	3769	3617	1560	1630	3409.1	3696.5	1692.65	1559.42	100	DOWN_AtMSCtrl_UP_AtC32I
AT1G14280	810.65	-1.3535	0.260145	-5.20287	1.96239e-07	3.43377e-06	583	376	1122	1164	527.33	384.264	1217.41	1113.6	100	UP_AtMSCtrl_DOWN_AtC32I
AT1G34220	1075.65	-1.26072	0.242415	-5.20067	1.98566e-07	3.46795e-06	655	660	1536	1431	592.455	674.506	1666.61	1369.04	100	UP_AtMSCtrl_DOWN_AtC32I
AT2G26500	15864.4	1.24047	0.238523	5.20064	1.986e-07	3.46795e-06	20016	25913	8719	9836	18104.7	26482.5	9460.42	9410.09	100	DOWN_AtMSCtrl_UP_AtC32I
AT5G28300	692.438	-1.45292	0.279551	-5.19734	2.02159e-07	3.52648e-06	455	322	1103	870	411.552	329.077	1196.79	832.328	100	UP_AtMSCtrl_DOWN_AtC32I
AT4G04740	572.406	-1.89699	0.365079	-5.19611	2.03505e-07	3.54632e-06	386	132	785	997	349.141	134.901	851.752	953.829	100	UP_AtMSCtrl_DOWN_AtC32I
AT4G17600	1827.72	1.22799	0.236465	5.19312	2.06801e-07	3.60007e-06	2512	2790	1084	1057	2272.13	2851.32	1176.18	1011.23	100	DOWN_AtMSCtrl_UP_AtC32I
AT1G25682	516.49	-1.47973	0.285133	-5.18964	2.10702e-07	3.66424e-06	356	218	753	736	322.006	222.791	817.031	704.13	100	UP_AtMSCtrl_DOWN_AtC32I
AT1G54740	2865.6	-1.49429	0.287988	-5.18872	2.11744e-07	3.67858e-06	1159	1913	4211	4066	1048.33	1955.05	4569.08	3889.94	100	UP_AtMSCtrl_DOWN_AtC32I
AT5G25770	337.382	-1.57155	0.303015	-5.18636	2.14441e-07	3.72164e-06	196	159	391	612	177.284	162.495	424.249	585.5	100	UP_AtMSCtrl_DOWN_AtC32I
AT5G52540	625.054	1.46981	0.283506	5.1844	2.16708e-07	3.75716e-06	1223	715	293	361	1106.22	730.715	317.915	345.368	100	DOWN_AtMSCtrl_UP_AtC32I
AT5G21430	1274.67	1.2729	0.245545	5.18397	2.17212e-07	3.76206e-06	1886	1860	592	888	1705.91	1900.88	642.341	849.549	100	DOWN_AtMSCtrl_UP_AtC32I
AT1G13820	687.838	1.30655	0.25218	5.18102	2.20679e-07	3.81821e-06	991	1040	380	397	896.37	1062.86	412.313	379.809	100	DOWN_AtMSCtrl_UP_AtC32I
AT1G29470	1808.93	-1.16685	0.225304	-5.17901	2.23062e-07	3.85285e-06	1336	999	2303	2621	1208.43	1020.96	2498.83	2507.51	100	UP_AtMSCtrl_DOWN_AtC32I
AT2G42270	609.498	-1.70596	0.329402	-5.17895	2.23134e-07	3.85285e-06	425	183	783	1063	384.417	187.022	849.582	1016.97	100	UP_AtMSCtrl_DOWN_AtC32I
AT4G00860	1019.93	1.27772	0.246751	5.1782	2.24033e-07	3.86446e-06	1727	1298	492	687	1562.09	1326.53	533.837	657.252	100	DOWN_AtMSCtrl_UP_AtC32I
AT1G72520	492.538	1.40231	0.270965	5.17523	2.27636e-07	3.92263e-06	780	708	280	248	705.519	723.561	303.81	237.261	100	DOWN_AtMSCtrl_UP_AtC32I
AT4G34950	2137.86	1.14325	0.221019	5.17262	2.30829e-07	3.97362e-06	3423	2730	1289	1324	3096.14	2790	1398.61	1266.67	100	DOWN_AtMSCtrl_UP_AtC32I
AT3G54760	615.13	-1.49653	0.289346	-5.1721	2.31472e-07	3.98066e-06	439	241	808	983	397.08	246.297	876.708	940.435	100	UP_AtMSCtrl_DOWN_AtC32I
AT5G59420	1715.95	-1.23142	0.238102	-5.17181	2.31831e-07	3.98281e-06	998	1123	2380	2332	902.702	1147.68	2582.38	2231.02	100	UP_AtMSCtrl_DOWN_AtC32I
AT5G13460	191.794	-1.76324	0.340979	-5.17112	2.32694e-07	3.9936e-06	98	84	302	277	88.6421	85.8462	327.68	265.006	100	UP_AtMSCtrl_DOWN_AtC32I
AT5G27290	464.917	1.42101	0.275024	5.16684	2.38079e-07	4.08191e-06	764	649	203	298	691.046	663.264	220.262	285.096	100	DOWN_AtMSCtrl_UP_AtC32I
AT4G24460	480.443	1.55177	0.300377	5.16609	2.39044e-07	4.09432e-06	865	637	175	312	782.402	651	189.881	298.49	100	DOWN_AtMSCtrl_UP_AtC32I
AT5G42950	2640.99	-1.20238	0.232794	-5.165	2.40437e-07	4.11404e-06	1704	1623	3849	3332	1541.29	1658.67	4176.3	3187.72	100	UP_AtMSCtrl_DOWN_AtC32I
AT5G12480	584.679	-1.30858	0.253381	-5.16448	2.41107e-07	4.12135e-06	391	312	750	891	353.664	318.857	813.776	852.419	100	UP_AtMSCtrl_DOWN_AtC32I
AT3G10010	134.295	-2.02922	0.393143	-5.16152	2.44947e-07	4.18279e-06	67	44	180	247	60.6022	44.9671	195.306	236.305	100	UP_AtMSCtrl_DOWN_AtC32I
AT5G05250	262.19	1.64394	0.318604	5.15981	2.47203e-07	4.21708e-06	407	417	134	114	368.136	426.165	145.395	109.064	100	DOWN_AtMSCtrl_UP_AtC32I
AT3G23170	491.067	1.54705	0.299902	5.15852	2.48907e-07	4.2419e-06	663	845	266	222	599.691	863.572	288.619	212.387	100	DOWN_AtMSCtrl_UP_AtC32I
AT4G18970	662.665	1.34199	0.260297	5.15561	2.52803e-07	4.30399e-06	1100	886	389	343	994.962	905.473	422.078	328.148	100	DOWN_AtMSCtrl_UP_AtC32I
AT1G71880	1616.88	1.19093	0.231025	5.15497	2.53669e-07	4.31113e-06	2344	2326	987	940	2120.17	2377.12	1070.93	899.297	100	DOWN_AtMSCtrl_UP_AtC32I
AT3G13870	1571.68	-1.23391	0.239373	-5.15474	2.53983e-07	4.31113e-06	1176	794	1955	2394	1063.7	811.451	2121.24	2290.34	100	UP_AtMSCtrl_DOWN_AtC32I
AT5G02230	149.337	1.99762	0.387531	5.15475	2.53964e-07	4.31113e-06	281	219	43	76	254.168	223.813	46.6565	72.7091	100	DOWN_AtMSCtrl_UP_AtC32I
AT1G09430	4171.47	-1.08851	0.211227	-5.15327	2.55987e-07	4.3408e-06	2879	2674	5462	5668	2604.09	2732.77	5926.46	5422.57	100	UP_AtMSCtrl_DOWN_AtC32I
AT2G20330	980.342	-1.25491	0.243589	-5.15175	2.58067e-07	4.37171e-06	672	538	1400	1301	607.831	549.825	1519.05	1244.67	100	UP_AtMSCtrl_DOWN_AtC32I
AT2G22795	431.589	-1.71146	0.332333	-5.14981	2.60744e-07	4.41267e-06	151	262	640	656	136.581	267.758	694.422	627.594	100	UP_AtMSCtrl_DOWN_AtC32I
AT3G13065	462.107	-1.47688	0.287007	-5.14581	2.66362e-07	4.50327e-06	296	216	533	817	267.735	220.747	578.323	781.623	100	UP_AtMSCtrl_DOWN_AtC32I
AT3G45600	577.817	1.30467	0.253702	5.14253	2.71061e-07	4.57816e-06	916	799	323	330	828.532	816.561	350.466	315.711	100	DOWN_AtMSCtrl_UP_AtC32I
AT3G26710	1145.68	1.24033	0.241354	5.13906	2.76114e-07	4.65888e-06	1610	1726	583	763	1456.26	1763.94	632.575	729.961	100	DOWN_AtMSCtrl_UP_AtC32I
AT2G39340	1093.47	-1.59708	0.310922	-5.13661	2.79742e-07	4.71541e-06	785	368	1279	1986	710.041	376.088	1387.76	1900	100	UP_AtMSCtrl_DOWN_AtC32I
AT3G59060	4774.45	-1.14963	0.223827	-5.13624	2.80287e-07	4.71993e-06	2876	3261	6050	6898	2601.37	3332.67	6564.46	6599.31	100	UP_AtMSCtrl_DOWN_AtC32I
AT1G59124	508.25	-1.39265	0.27131	-5.13307	2.8505e-07	4.79537e-06	345	243	725	717	312.056	248.341	786.65	685.953	100	UP_AtMSCtrl_DOWN_AtC32I
AT2G21970	3402.32	1.22636	0.238934	5.13264	2.85709e-07	4.80171e-06	4584	5272	2084	1896	4146.28	5387.87	2261.21	1813.9	100	DOWN_AtMSCtrl_UP_AtC32I
AT5G40520	175.202	-1.94031	0.378105	-5.13167	2.87177e-07	4.82163e-06	101	52	272	273	91.3556	53.1429	295.129	261.179	100	UP_AtMSCtrl_DOWN_AtC32I
AT1G20160	176.59	-1.77431	0.345915	-5.12931	2.90802e-07	4.87767e-06	83	83	240	299	75.0744	84.8242	260.408	286.053	100	UP_AtMSCtrl_DOWN_AtC32I
AT1G31440	662.941	-1.29299	0.252149	-5.12787	2.93043e-07	4.90559e-06	463	342	870	982	418.789	349.517	943.98	939.478	100	UP_AtMSCtrl_DOWN_AtC32I
AT1G75460	3197.62	1.14193	0.22269	5.12792	2.92968e-07	4.90559e-06	5140	4063	2002	1899	4649.19	4152.3	2172.24	1816.77	100	DOWN_AtMSCtrl_UP_AtC32I
AT3G23810	990.941	1.41119	0.27531	5.12582	2.9625e-07	4.9544e-06	1907	1131	440	633	1724.9	1155.86	477.415	605.59	100	DOWN_AtMSCtrl_UP_AtC32I
AT5G01650	1009.29	1.26781	0.247626	5.11987	3.05744e-07	5.10815e-06	1465	1495	483	690	1325.11	1527.86	524.072	660.122	100	DOWN_AtMSCtrl_UP_AtC32I
AT5G52920	4600.16	-1.06364	0.20776	-5.11957	3.06228e-07	5.11122e-06	3320	2888	5811	6419	3002.98	2951.47	6305.14	6141.05	100	UP_AtMSCtrl_DOWN_AtC32I
AT2G46680	312.892	-1.66841	0.325999	-5.11783	3.09075e-07	5.15367e-06	137	172	514	412	123.918	175.78	557.708	394.16	100	UP_AtMSCtrl_DOWN_AtC32I
AT4G34350	3263.39	-1.18373	0.231372	-5.11614	3.11849e-07	5.19484e-06	1892	2230	4215	4693	1711.33	2279.01	4573.42	4489.79	100	UP_AtMSCtrl_DOWN_AtC32I
AT2G32480	1885.25	1.14221	0.223274	5.11573	3.12527e-07	5.20104e-06	2660	2724	1070	1244	2406	2783.87	1160.99	1190.13	100	DOWN_AtMSCtrl_UP_AtC32I
AT1G65970	71.4264	-2.7048	0.528856	-5.11443	3.14684e-07	5.23181e-06	14	25	117	126	12.6632	25.5495	126.949	120.544	100	UP_AtMSCtrl_DOWN_AtC32I
AT3G61870	2476.63	1.13231	0.221437	5.11349	3.16255e-07	5.25279e-06	4024	3095	1500	1543	3639.75	3163.02	1627.55	1476.19	100	DOWN_AtMSCtrl_UP_AtC32I
AT4G36810	1275.16	1.18711	0.232166	5.11318	3.16784e-07	5.25645e-06	1917	1771	777	746	1733.95	1809.92	843.072	713.697	100	DOWN_AtMSCtrl_UP_AtC32I
AT3G04740	1115.33	-1.40185	0.274205	-5.11242	3.18061e-07	5.2725e-06	836	458	1555	1620	756.171	468.066	1687.23	1549.85	100	UP_AtMSCtrl_DOWN_AtC32I
AT3G25440	131.108	-2.00798	0.392832	-5.11155	3.19531e-07	5.28955e-06	49	59	185	229	44.321	60.2967	200.731	219.084	100	UP_AtMSCtrl_DOWN_AtC32I
AT4G02560	303.747	-1.78019	0.348275	-5.11144	3.19712e-07	5.28955e-06	195	95	493	425	176.38	97.088	534.922	406.597	100	UP_AtMSCtrl_DOWN_AtC32I
AT3G60030	2011.26	-1.26403	0.247324	-5.11081	3.20772e-07	5.30194e-06	1543	948	2681	2897	1395.66	968.836	2908.98	2771.56	100	UP_AtMSCtrl_DOWN_AtC32I
AT1G24300	858.028	-1.24078	0.242796	-5.11039	3.21487e-07	5.30823e-06	589	477	1193	1168	532.757	487.484	1294.45	1117.42	100	UP_AtMSCtrl_DOWN_AtC32I
AT3G60860	895.172	-1.5057	0.294645	-5.11022	3.21777e-07	5.30823e-06	662	326	1257	1343	598.786	333.165	1363.89	1284.85	100	UP_AtMSCtrl_DOWN_AtC32I
AT4G00752	447.605	-1.37969	0.270016	-5.10966	3.22731e-07	5.3188e-06	284	235	551	727	256.881	240.165	597.854	695.52	100	UP_AtMSCtrl_DOWN_AtC32I
AT4G23050	214.388	-1.66057	0.325035	-5.10889	3.24049e-07	5.33535e-06	117	98	321	317	105.828	100.154	348.296	303.274	100	UP_AtMSCtrl_DOWN_AtC32I
AT5G08040	262.827	1.64495	0.322026	5.10814	3.25352e-07	5.35163e-06	428	401	96	157	387.131	409.813	104.163	150.202	100	DOWN_AtMSCtrl_UP_AtC32I
AT1G27980	549.555	-1.33962	0.262398	-5.1053	3.30269e-07	5.42666e-06	318	328	676	880	287.634	335.209	733.483	841.895	100	UP_AtMSCtrl_DOWN_AtC32I
AT4G32070	314.386	-1.53301	0.300288	-5.10514	3.30552e-07	5.42666e-06	184	153	485	427	166.43	156.363	526.242	408.51	100	UP_AtMSCtrl_DOWN_AtC32I
AT3G44100	1018.53	1.2043	0.236	5.10295	3.34391e-07	5.4844e-06	1590	1373	526	692	1438.17	1403.18	570.728	662.036	100	DOWN_AtMSCtrl_UP_AtC32I
AT4G15510	384.698	1.40053	0.274477	5.10255	3.35112e-07	5.49094e-06	618	545	201	214	558.988	556.978	218.092	204.734	100	DOWN_AtMSCtrl_UP_AtC32I
AT4G27120	385.269	-1.43258	0.280821	-5.10139	3.37171e-07	5.51934e-06	210	222	493	616	189.947	226.879	534.922	589.326	100	UP_AtMSCtrl_DOWN_AtC32I
AT4G25890	266.727	1.55191	0.304277	5.10033	3.39061e-07	5.54495e-06	423	404	132	134	382.608	412.879	143.225	128.198	100	DOWN_AtMSCtrl_UP_AtC32I
AT5G42530	23618.8	1.44242	0.282878	5.09907	3.41317e-07	5.57649e-06	50175	23170	11893	13074	45383.8	23679.2	12904.3	12507.9	100	DOWN_AtMSCtrl_UP_AtC32I
AT1G21730	282.976	-1.7098	0.335429	-5.09734	3.44456e-07	5.62137e-06	183	97	369	488	165.526	99.1319	400.378	466.869	100	UP_AtMSCtrl_DOWN_AtC32I
AT2G32235	85.4901	2.375	0.465942	5.09719	3.44725e-07	5.62137e-06	153	145	29	25	138.39	148.187	31.466	23.9175	100	DOWN_AtMSCtrl_UP_AtC32I
AT1G74670	2745.49	1.11193	0.218155	5.09696	3.45146e-07	5.62284e-06	3933	3866	1519	1908	3557.44	3950.97	1648.17	1825.38	100	DOWN_AtMSCtrl_UP_AtC32I
AT5G62000	7274.54	-1.11516	0.218861	-5.09528	3.48225e-07	5.66758e-06	5540	4089	9761	9739	5010.99	4178.87	10591	9317.29	100	UP_AtMSCtrl_DOWN_AtC32I
AT4G24930	1075.31	1.18853	0.233286	5.09472	3.4926e-07	5.67899e-06	1555	1549	619	669	1406.51	1583.05	671.636	640.032	100	DOWN_AtMSCtrl_UP_AtC32I
AT2G45070	1755.02	1.11311	0.218651	5.09078	3.56585e-07	5.79254e-06	2693	2314	1020	1163	2435.85	2364.86	1106.74	1112.64	100	DOWN_AtMSCtrl_UP_AtC32I
AT3G16140	23896.4	1.05888	0.208047	5.08962	3.58791e-07	5.82282e-06	34569	32600	15195	15171	31268	33316.5	16487.1	14514.1	100	DOWN_AtMSCtrl_UP_AtC32I
AT3G48530	4094.02	-1.1136	0.218946	-5.08618	3.65344e-07	5.92351e-06	2602	2762	5343	5647	2353.54	2822.71	5797.34	5402.48	100	UP_AtMSCtrl_DOWN_AtC32I
AT1G29660	2480.88	1.10852	0.218071	5.08328	3.70963e-07	6.00317e-06	3935	3151	1389	1711	3559.25	3220.26	1507.11	1636.91	100	DOWN_AtMSCtrl_UP_AtC32I
AT3G02910	686.737	1.26433	0.248714	5.08345	3.70636e-07	6.00317e-06	1114	912	349	448	1007.63	932.045	378.677	428.601	100	DOWN_AtMSCtrl_UP_AtC32I
AT2G04790	482.068	1.6136	0.317448	5.08303	3.71459e-07	6.00549e-06	751	758	155	320	679.288	774.66	168.18	306.144	100	DOWN_AtMSCtrl_UP_AtC32I
AT4G25970	2957.28	-1.07617	0.211736	-5.0826	3.72298e-07	6.01333e-06	2073	1889	3643	4255	1875.05	1930.52	3952.78	4070.75	100	UP_AtMSCtrl_DOWN_AtC32I
AT2G39900	458.453	1.36156	0.267988	5.08066	3.76119e-07	6.06929e-06	744	633	255	248	672.956	646.913	276.684	237.261	100	DOWN_AtMSCtrl_UP_AtC32I
AT4G16660	603.07	-1.46126	0.287663	-5.07975	3.77923e-07	6.08686e-06	432	246	874	859	390.749	251.407	948.32	821.804	100	UP_AtMSCtrl_DOWN_AtC32I
AT5G42400	202.01	-2.00795	0.395273	-5.07992	3.77589e-07	6.08686e-06	122	49	320	314	110.35	50.077	347.211	300.403	100	UP_AtMSCtrl_DOWN_AtC32I
AT3G60420	449.032	1.41327	0.278359	5.07716	3.83122e-07	6.16475e-06	739	624	195	291	668.434	637.715	211.582	278.399	100	DOWN_AtMSCtrl_UP_AtC32I
AT1G02475	1194.62	1.15671	0.227855	5.0765	3.84455e-07	6.17634e-06	1862	1580	660	798	1684.2	1614.73	716.123	763.446	100	DOWN_AtMSCtrl_UP_AtC32I
AT3G02830	1335.08	1.2155	0.239439	5.07644	3.84569e-07	6.17634e-06	2238	1672	671	919	2024.3	1708.75	728.058	879.206	100	DOWN_AtMSCtrl_UP_AtC32I
AT1G71950	482.281	1.43847	0.283381	5.0761	3.85255e-07	6.18153e-06	668	788	217	297	604.213	805.319	235.453	284.14	100	DOWN_AtMSCtrl_UP_AtC32I
AT4G16910	39.1597	-3.6536	0.720289	-5.07241	3.92812e-07	6.29684e-06	6	6	57	87	5.42707	6.13187	61.847	83.2328	100	UP_AtMSCtrl_DOWN_AtC32I
AT4G24020	1854.95	-1.13743	0.224285	-5.07136	3.94977e-07	6.32558e-06	1378	1049	2417	2591	1246.42	1072.06	2622.53	2478.81	100	UP_AtMSCtrl_DOWN_AtC32I
AT1G63970	791.376	1.33739	0.263904	5.0677	4.02659e-07	6.44255e-06	1069	1273	449	429	966.922	1300.98	487.181	410.424	100	DOWN_AtMSCtrl_UP_AtC32I
AT5G65750	1261.36	-1.21672	0.24035	-5.06228	4.1428e-07	6.62225e-06	933	659	1720	1737	843.909	673.484	1866.26	1661.79	100	UP_AtMSCtrl_DOWN_AtC32I
AT5G14320	5979.16	1.05935	0.209327	5.06073	4.17649e-07	6.66983e-06	8658	8151	3729	3877	7831.26	8330.15	4046.09	3709.12	100	DOWN_AtMSCtrl_UP_AtC32I
AT3G13450	2072.68	-1.30336	0.257643	-5.05878	4.21942e-07	6.73207e-06	1142	1329	2263	3600	1032.95	1358.21	2455.43	3444.12	100	UP_AtMSCtrl_DOWN_AtC32I
AT5G49880	450.143	-1.3753	0.271949	-5.05719	4.25486e-07	6.78225e-06	305	220	609	668	275.876	224.835	660.786	639.075	100	UP_AtMSCtrl_DOWN_AtC32I
AT5G59210	305.609	-1.47282	0.291251	-5.05689	4.2616e-07	6.78664e-06	175	162	397	489	158.289	165.561	430.759	467.826	100	UP_AtMSCtrl_DOWN_AtC32I
AT4G33865	1215.46	1.20043	0.237436	5.0558	4.28591e-07	6.8126e-06	1687	1822	653	800	1525.91	1862.05	708.528	765.359	100	DOWN_AtMSCtrl_UP_AtC32I
AT5G35210	2093.71	-1.57177	0.31088	-5.05587	4.28437e-07	6.8126e-06	1582	662	2669	3524	1430.94	676.55	2895.96	3371.41	100	UP_AtMSCtrl_DOWN_AtC32I
AT1G76320	282.007	-1.74236	0.344669	-5.05516	4.30038e-07	6.82921e-06	178	96	464	382	161.003	98.11	503.456	365.459	100	UP_AtMSCtrl_DOWN_AtC32I
AT2G36835	1241.63	1.25477	0.248329	5.05284	4.35284e-07	6.90607e-06	1638	1975	685	756	1481.59	2018.41	743.249	723.264	100	DOWN_AtMSCtrl_UP_AtC32I
AT2G42130	812.047	1.24212	0.245835	5.05266	4.35709e-07	6.90638e-06	1167	1201	469	477	1055.56	1227.4	508.881	456.345	100	DOWN_AtMSCtrl_UP_AtC32I
AT1G30420	188.426	-1.9885	0.393593	-5.05217	4.36821e-07	6.91755e-06	113	48	296	294	102.21	49.055	321.17	281.269	100	UP_AtMSCtrl_DOWN_AtC32I
AT5G23450	2188.98	-1.09115	0.216014	-5.05129	4.38827e-07	6.94286e-06	1568	1349	2823	3027	1418.27	1378.65	3063.05	2895.93	100	UP_AtMSCtrl_DOWN_AtC32I
AT2G35050	4261.94	-1.15323	0.228365	-5.04996	4.41891e-07	6.98421e-06	3320	2235	5561	5986	3002.98	2284.12	6033.88	5726.8	100	UP_AtMSCtrl_DOWN_AtC32I
AT3G47890	550.779	-1.58724	0.314317	-5.0498	4.42262e-07	6.98421e-06	393	190	703	931	355.473	194.176	762.779	890.687	100	UP_AtMSCtrl_DOWN_AtC32I
AT3G09860	1582.22	1.24948	0.247454	5.04935	4.43314e-07	6.99433e-06	2091	2509	799	1052	1891.33	2564.14	866.943	1006.45	100	DOWN_AtMSCtrl_UP_AtC32I
AT4G02570	3159.28	-1.08991	0.215919	-5.04777	4.47006e-07	7.04604e-06	2383	1843	4013	4436	2155.45	1883.51	4354.24	4243.92	100	UP_AtMSCtrl_DOWN_AtC32I
AT3G12640	408.506	-1.43706	0.284727	-5.04716	4.48429e-07	7.06193e-06	279	184	549	625	252.359	188.044	595.684	597.937	100	UP_AtMSCtrl_DOWN_AtC32I
AT4G37450	413.543	1.64056	0.325383	5.04193	4.60855e-07	7.2509e-06	885	442	195	199	800.492	451.715	211.582	190.383	100	DOWN_AtMSCtrl_UP_AtC32I
AT1G04280	722.893	-1.30724	0.259283	-5.04175	4.61284e-07	7.25094e-06	403	458	881	1153	364.518	468.066	955.916	1103.07	100	UP_AtMSCtrl_DOWN_AtC32I
AT3G31161	31.2567	-4.97679	0.98734	-5.0406	4.64076e-07	7.2881e-06	2	2	72	45	1.80902	2.04396	78.1225	43.0514	100	UP_AtMSCtrl_DOWN_AtC32I
AT2G23450	860.761	-1.2785	0.253686	-5.03969	4.66278e-07	7.31591e-06	635	421	1139	1257	574.364	430.253	1235.85	1202.57	100	UP_AtMSCtrl_DOWN_AtC32I
AT5G04290	498.635	-1.67114	0.331631	-5.03915	4.67592e-07	7.32978e-06	175	312	746	740	158.289	318.857	809.436	707.957	100	UP_AtMSCtrl_DOWN_AtC32I
AT5G10650	444.89	-1.53545	0.304733	-5.03867	4.6879e-07	7.34178e-06	312	170	645	652	282.207	173.736	699.847	623.768	100	UP_AtMSCtrl_DOWN_AtC32I
AT2G21330	21124.2	1.12553	0.223445	5.03715	4.72524e-07	7.39345e-06	27845	32050	12815	13224	25186.1	32754.4	13904.7	12651.4	100	DOWN_AtMSCtrl_UP_AtC32I
AT1G32900	149.065	-2.11941	0.421044	-5.0337	4.81114e-07	7.52094e-06	39	75	233	242	35.2759	76.6484	252.813	231.521	100	UP_AtMSCtrl_DOWN_AtC32I
AT4G35800	2203.03	-1.16004	0.230549	-5.03167	4.86228e-07	7.5939e-06	1668	1189	2973	2992	1508.72	1215.13	3225.81	2862.44	100	UP_AtMSCtrl_DOWN_AtC32I
AT2G33180	446.443	1.38885	0.276062	5.03094	4.88077e-07	7.61579e-06	663	678	205	283	599.691	692.902	222.432	270.746	100	DOWN_AtMSCtrl_UP_AtC32I
AT1G10890	622.516	-1.50586	0.299341	-5.03058	4.88991e-07	7.62306e-06	269	397	763	1059	243.313	405.726	827.881	1013.14	100	UP_AtMSCtrl_DOWN_AtC32I
AT4G16420	506.562	-1.34305	0.267109	-5.02812	4.95307e-07	7.71445e-06	318	279	740	680	287.634	285.132	802.926	650.555	100	UP_AtMSCtrl_DOWN_AtC32I
AT1G01040	841.209	-1.28899	0.256376	-5.02772	4.96336e-07	7.72341e-06	610	416	1014	1346	551.752	425.143	1100.23	1287.72	100	UP_AtMSCtrl_DOWN_AtC32I
AT4G27430	855.33	-1.23411	0.245521	-5.02649	4.99545e-07	7.76624e-06	615	454	1161	1193	556.274	463.978	1259.73	1141.34	100	UP_AtMSCtrl_DOWN_AtC32I
AT5G44750	655.027	-1.53571	0.305549	-5.02609	5.00591e-07	7.77539e-06	469	242	781	1151	424.216	247.319	847.412	1101.16	100	UP_AtMSCtrl_DOWN_AtC32I
AT1G61040	662.238	-1.56179	0.310771	-5.02551	5.02091e-07	7.79157e-06	258	428	967	971	233.364	437.407	1049.23	928.955	100	UP_AtMSCtrl_DOWN_AtC32I
AT4G15440	762.755	1.36183	0.271001	5.02519	5.02931e-07	7.79749e-06	1444	871	391	450	1306.11	890.144	424.249	430.514	100	DOWN_AtMSCtrl_UP_AtC32I
AT3G20250	1253.39	-1.1557	0.230097	-5.02269	5.09534e-07	7.89267e-06	917	708	1567	1840	829.437	723.561	1700.25	1760.33	100	UP_AtMSCtrl_DOWN_AtC32I
AT1G70370	1622.35	1.16904	0.232837	5.02086	5.14415e-07	7.96103e-06	2367	2300	1016	936	2140.98	2350.55	1102.4	895.47	100	DOWN_AtMSCtrl_UP_AtC32I
AT3G28730	1110.5	-1.17777	0.234643	-5.01942	5.18286e-07	8.01365e-06	780	642	1318	1725	705.519	656.11	1430.08	1650.31	100	UP_AtMSCtrl_DOWN_AtC32I
AT1G60730	736.357	-1.26565	0.252175	-5.01893	5.196e-07	8.02667e-06	456	443	1054	979	412.457	452.737	1143.63	936.608	100	UP_AtMSCtrl_DOWN_AtC32I
AT1G28250	307.305	1.4901	0.297044	5.01644	5.26365e-07	8.12379e-06	548	402	144	174	495.672	410.835	156.245	166.466	100	DOWN_AtMSCtrl_UP_AtC32I
AT3G02400	64.0385	-2.75473	0.549239	-5.01554	5.28851e-07	8.15476e-06	13	21	112	106	11.7586	21.4616	121.524	101.41	100	UP_AtMSCtrl_DOWN_AtC32I
AT4G39730	874.441	1.22629	0.244744	5.0105	5.42898e-07	8.36377e-06	1401	1158	436	600	1267.22	1183.45	473.075	574.019	100	DOWN_AtMSCtrl_UP_AtC32I
AT1G10370	84.4261	2.4455	0.488119	5.01004	5.44179e-07	8.37592e-06	130	164	29	22	117.586	167.605	31.466	21.0474	100	DOWN_AtMSCtrl_UP_AtC32I
AT1G55140	368.285	1.38892	0.277299	5.00874	5.47862e-07	8.42499e-06	581	529	182	219	525.521	540.627	197.476	209.517	100	DOWN_AtMSCtrl_UP_AtC32I
AT2G35330	658.915	-1.37513	0.274713	-5.00571	5.56572e-07	8.5512e-06	350	408	993	862	316.579	416.967	1077.44	824.674	100	UP_AtMSCtrl_DOWN_AtC32I
AT3G52250	781.285	-1.56169	0.312044	-5.0047	5.59487e-07	8.58049e-06	573	266	1183	1099	518.285	271.846	1283.6	1051.41	100	UP_AtMSCtrl_DOWN_AtC32I
AT4G13520	869.632	1.39334	0.278398	5.00484	5.59084e-07	8.58049e-06	1091	1500	411	536	986.821	1532.97	445.949	512.791	100	DOWN_AtMSCtrl_UP_AtC32I
AT1G19910	3331.55	1.1176	0.223411	5.00243	5.66121e-07	8.6744e-06	4577	4875	2053	2066	4139.95	4982.15	2227.58	1976.54	100	DOWN_AtMSCtrl_UP_AtC32I
AT3G01500	41873.6	1.07079	0.214095	5.00146	5.68964e-07	8.71008e-06	56893	60680	26071	26897	51460.3	62013.7	28287.9	25732.3	100	DOWN_AtMSCtrl_UP_AtC32I
AT3G17880	599.648	-1.24801	0.249538	-5.00129	5.69474e-07	8.71008e-06	388	352	785	874	350.95	359.737	851.752	836.155	100	UP_AtMSCtrl_DOWN_AtC32I
AT5G61330	369.704	-1.4703	0.294024	-5.00061	5.71499e-07	8.7332e-06	182	223	488	582	164.621	227.901	529.497	556.799	100	UP_AtMSCtrl_DOWN_AtC32I
AT1G54460	355.945	-1.60179	0.320332	-5.00042	5.72066e-07	8.73402e-06	245	128	476	580	221.605	130.813	516.476	554.885	100	UP_AtMSCtrl_DOWN_AtC32I
AT1G48760	612.528	-1.42693	0.285455	-4.99877	5.76964e-07	8.8009e-06	440	260	904	842	397.985	265.714	980.871	805.54	100	UP_AtMSCtrl_DOWN_AtC32I
AT3G17120	188.067	1.69767	0.339702	4.99754	5.8066e-07	8.84934e-06	333	268	76	99	301.202	273.89	82.4626	94.7132	100	DOWN_AtMSCtrl_UP_AtC32I
AT5G16180	296.39	-1.64379	0.329101	-4.9948	5.88977e-07	8.96805e-06	193	110	464	413	174.571	112.418	503.456	395.117	100	UP_AtMSCtrl_DOWN_AtC32I
AT2G47410	540.746	-1.53726	0.307884	-4.993	5.94493e-07	9.04395e-06	383	203	648	947	346.428	207.462	703.102	905.994	100	UP_AtMSCtrl_DOWN_AtC32I
AT1G50030	1032.53	-1.29273	0.258994	-4.99134	5.9962e-07	9.11379e-06	746	511	1177	1731	674.765	522.231	1277.09	1656.05	100	UP_AtMSCtrl_DOWN_AtC32I
AT1G55860	1500.03	-1.17728	0.235891	-4.99077	6.01387e-07	9.13249e-06	1087	838	1728	2389	983.203	856.418	1874.94	2285.55	100	UP_AtMSCtrl_DOWN_AtC32I
AT5G27240	92.7281	-2.44292	0.489563	-4.99001	6.03769e-07	9.16049e-06	42	19	117	195	37.9895	19.4176	126.949	186.556	100	UP_AtMSCtrl_DOWN_AtC32I
AT3G54230	928.979	-1.19635	0.239855	-4.98779	6.10731e-07	9.25786e-06	647	532	1104	1452	585.219	543.693	1197.88	1389.13	100	UP_AtMSCtrl_DOWN_AtC32I
AT3G45850	428.204	-1.77835	0.356594	-4.98706	6.13059e-07	9.28487e-06	298	114	595	712	269.544	116.506	645.596	681.17	100	UP_AtMSCtrl_DOWN_AtC32I
AT2G15080	1891.11	-1.66628	0.334308	-4.98427	6.21958e-07	9.41126e-06	1421	515	2521	3154	1285.31	526.319	2735.37	3017.43	100	UP_AtMSCtrl_DOWN_AtC32I
AT3G51840	8074.27	-1.0397	0.208634	-4.98339	6.24798e-07	9.44584e-06	5507	5468	9901	11482	4981.14	5588.18	10742.9	10984.8	100	UP_AtMSCtrl_DOWN_AtC32I
AT5G15320	909.612	1.17447	0.235722	4.98246	6.27809e-07	9.48293e-06	1452	1182	512	587	1313.35	1207.98	555.538	561.582	100	DOWN_AtMSCtrl_UP_AtC32I
AT2G44840	35.6097	4.21579	0.846247	4.98175	6.30109e-07	9.50922e-06	69	71	6	1	62.4113	72.5605	6.51021	0.956699	100	DOWN_AtMSCtrl_UP_AtC32I
AT4G20970	25.1912	8.06962	1.62195	4.97525	6.51648e-07	9.82555e-06	47	57	0	0	42.512	58.2528	0	0	100	DOWN_AtMSCtrl_UP_AtC32I
AT3G47910	573.575	-1.34741	0.27087	-4.97439	6.54539e-07	9.8604e-06	408	272	707	920	369.04	277.978	767.119	880.163	100	UP_AtMSCtrl_DOWN_AtC32I
AT1G20960	1757.43	-1.16635	0.23448	-4.9742	6.55164e-07	9.86109e-06	1290	978	2464	2289	1166.82	999.495	2673.53	2189.88	100	UP_AtMSCtrl_DOWN_AtC32I
AT4G18370	1022.78	1.1709	0.235468	4.97266	6.60401e-07	9.93112e-06	1486	1457	551	690	1344.1	1489.02	597.854	660.122	100	DOWN_AtMSCtrl_UP_AtC32I
AT1G61890	1560.32	1.1457	0.230475	4.97107	6.65857e-07	9.99549e-06	2157	2297	922	985	1951.03	2347.49	1000.4	942.348	100	DOWN_AtMSCtrl_UP_AtC32I
AT4G27870	1830.46	-1.08568	0.218398	-4.97109	6.65763e-07	9.99549e-06	1318	1128	2245	2656	1192.15	1152.79	2435.9	2540.99	100	UP_AtMSCtrl_DOWN_AtC32I
AT5G24770	2291.75	1.1864	0.238724	4.96978	6.70277e-07	1.0053e-05	4051	2646	1337	1409	3664.17	2704.16	1450.69	1347.99	100	DOWN_AtMSCtrl_UP_AtC32I
AT5G15450	598.208	-1.34638	0.27105	-4.96728	6.78996e-07	1.01748e-05	422	287	869	810	381.704	293.308	942.895	774.926	100	UP_AtMSCtrl_DOWN_AtC32I
AT5G37350	408.428	-1.35347	0.272492	-4.96699	6.7999e-07	1.01807e-05	255	224	509	650	230.65	228.923	552.283	621.854	100	UP_AtMSCtrl_DOWN_AtC32I
AT1G29700	935.219	1.1711	0.235975	4.96283	6.94733e-07	1.03831e-05	1395	1300	556	572	1261.79	1328.57	603.279	547.232	100	DOWN_AtMSCtrl_UP_AtC32I
AT3G56020	130.551	2.04109	0.411263	4.96297	6.94237e-07	1.03831e-05	182	250	50	50	164.621	255.495	54.2517	47.8349	100	DOWN_AtMSCtrl_UP_AtC32I
AT1G77030	285.785	-1.50738	0.303785	-4.96198	6.97782e-07	1.04196e-05	184	128	389	443	166.43	130.813	422.078	423.818	100	UP_AtMSCtrl_DOWN_AtC32I
AT2G27402	164.483	1.75163	0.353061	4.96127	7.00334e-07	1.04485e-05	293	237	71	77	265.022	242.209	77.0375	73.6658	100	DOWN_AtMSCtrl_UP_AtC32I
AT1G13160	265.036	-1.54462	0.311525	-4.95825	7.11322e-07	1.05968e-05	169	115	369	407	152.862	117.528	400.378	389.376	100	UP_AtMSCtrl_DOWN_AtC32I
AT3G56690	373.959	-1.50921	0.304387	-4.95819	7.11519e-07	1.05968e-05	260	150	518	570	235.173	153.297	562.048	545.318	100	UP_AtMSCtrl_DOWN_AtC32I
AT2G01940	431.919	-1.42716	0.287985	-4.95566	7.20839e-07	1.07262e-05	288	203	654	575	260.499	207.462	709.613	550.102	100	UP_AtMSCtrl_DOWN_AtC32I
AT4G02400	179.21	-1.79748	0.362742	-4.95525	7.22361e-07	1.07394e-05	99	69	216	337	89.5466	70.5165	234.367	322.408	100	UP_AtMSCtrl_DOWN_AtC32I
AT4G22310	704.869	1.28784	0.26004	4.95246	7.32821e-07	1.08854e-05	1170	922	328	484	1058.28	942.264	355.891	463.042	100	DOWN_AtMSCtrl_UP_AtC32I
AT5G57040	1687.32	1.11873	0.225965	4.95089	7.38762e-07	1.09641e-05	2409	2390	925	1175	2178.97	2442.53	1003.66	1124.12	100	DOWN_AtMSCtrl_UP_AtC32I
AT5G43050	163.16	1.78818	0.361235	4.95019	7.414e-07	1.09937e-05	312	219	69	75	282.207	223.813	74.8674	71.7524	100	DOWN_AtMSCtrl_UP_AtC32I
AT3G20510	307.56	1.53607	0.310636	4.9449	7.61823e-07	1.12867e-05	489	462	172	135	442.306	472.154	186.626	129.154	100	DOWN_AtMSCtrl_UP_AtC32I
AT1G58025	204.968	-1.7349	0.350976	-4.94307	7.69001e-07	1.13831e-05	120	79	247	379	108.541	80.7363	268.004	362.589	100	UP_AtMSCtrl_DOWN_AtC32I
AT4G10360	328.904	1.57792	0.319276	4.94219	7.72508e-07	1.14251e-05	524	501	116	213	473.964	512.011	125.864	203.777	100	DOWN_AtMSCtrl_UP_AtC32I
AT5G05800	548.002	-1.36839	0.277014	-4.93979	7.82071e-07	1.15564e-05	396	248	700	858	358.186	253.451	759.524	820.848	100	UP_AtMSCtrl_DOWN_AtC32I
AT2G34357	334.24	-1.51483	0.306743	-4.93844	7.87502e-07	1.16266e-05	228	137	444	532	206.228	140.011	481.755	508.964	100	UP_AtMSCtrl_DOWN_AtC32I
AT2G31040	1752.27	1.08143	0.219018	4.93764	7.90732e-07	1.16641e-05	2658	2305	1014	1201	2404.19	2355.66	1100.23	1149	100	DOWN_AtMSCtrl_UP_AtC32I
AT4G28880	1859.38	-1.11739	0.226387	-4.93576	7.98411e-07	1.17672e-05	1394	1062	2473	2517	1260.89	1085.34	2683.29	2408.01	100	UP_AtMSCtrl_DOWN_AtC32I
AT3G50240	360.163	-1.54086	0.31229	-4.93406	8.05386e-07	1.18597e-05	251	138	493	562	227.032	141.033	534.922	537.665	100	UP_AtMSCtrl_DOWN_AtC32I
AT1G48840	389.975	-1.37859	0.279485	-4.93262	8.1136e-07	1.19374e-05	263	191	513	596	237.886	195.198	556.623	570.193	100	UP_AtMSCtrl_DOWN_AtC32I
AT1G11240	517.248	-1.48572	0.301276	-4.93143	8.16298e-07	1.19997e-05	225	334	724	772	203.515	341.341	785.565	738.572	100	UP_AtMSCtrl_DOWN_AtC32I
AT5G27270	354.38	-1.81127	0.367349	-4.93065	8.19575e-07	1.20374e-05	243	92	482	607	219.796	94.022	522.987	580.716	100	UP_AtMSCtrl_DOWN_AtC32I
AT1G31870	299.798	-1.4459	0.29345	-4.92722	8.34065e-07	1.22397e-05	183	153	425	435	165.526	156.363	461.14	416.164	100	UP_AtMSCtrl_DOWN_AtC32I
AT5G50310	583.19	-1.43167	0.290604	-4.92654	8.37004e-07	1.22722e-05	427	239	733	948	386.226	244.253	795.33	906.95	100	UP_AtMSCtrl_DOWN_AtC32I
AT1G19720	598.019	-1.81268	0.368004	-4.92571	8.40535e-07	1.23134e-05	426	141	857	975	385.322	144.099	929.875	932.781	100	UP_AtMSCtrl_DOWN_AtC32I
AT5G45500	1561.37	-1.20097	0.243864	-4.92475	8.44663e-07	1.23632e-05	889	1066	2094	2174	804.11	1089.43	2272.06	2079.86	100	UP_AtMSCtrl_DOWN_AtC32I
AT4G16370	2428.33	1.13807	0.231232	4.92176	8.57681e-07	1.25429e-05	4160	2853	1433	1547	3762.77	2915.71	1554.85	1480.01	100	DOWN_AtMSCtrl_UP_AtC32I
AT1G65295	179.423	1.91611	0.389385	4.92088	8.61567e-07	1.2589e-05	376	222	86	60	340.096	226.879	93.313	57.4019	100	DOWN_AtMSCtrl_UP_AtC32I
AT2G19260	116.75	-2.00802	0.408115	-4.92024	8.64378e-07	1.26192e-05	53	44	194	171	47.9391	44.9671	210.497	163.596	100	UP_AtMSCtrl_DOWN_AtC32I
AT3G04640	188.333	1.85882	0.378004	4.91747	8.76696e-07	1.2788e-05	268	341	58	104	242.409	348.495	62.932	99.4967	100	DOWN_AtMSCtrl_UP_AtC32I
AT5G30510	6090.85	1.06898	0.217535	4.91405	8.92141e-07	1.30022e-05	8201	8886	3609	4127	7417.89	9081.3	3915.89	3948.3	100	DOWN_AtMSCtrl_UP_AtC32I
AT3G11090	64.08	2.70319	0.550117	4.91386	8.93024e-07	1.30039e-05	134	99	11	23	121.204	101.176	11.9354	22.0041	100	DOWN_AtMSCtrl_UP_AtC32I
AT4G08110	492.886	-1.41647	0.288334	-4.9126	8.98751e-07	1.30761e-05	353	213	615	802	319.292	217.681	667.296	767.272	100	UP_AtMSCtrl_DOWN_AtC32I
AT1G69490	1227.96	-1.11331	0.226686	-4.91122	9.05122e-07	1.31575e-05	841	775	1589	1709	760.694	792.034	1724.12	1635	100	UP_AtMSCtrl_DOWN_AtC32I
AT5G66052	3900.24	1.1017	0.22434	4.91086	9.06755e-07	1.317e-05	5207	5805	2214	2672	4709.79	5932.59	2402.27	2556.3	100	DOWN_AtMSCtrl_UP_AtC32I
AT2G30990	777.167	-1.4554	0.296415	-4.90999	9.10807e-07	1.32176e-05	581	298	1146	1082	525.521	304.55	1243.45	1035.15	100	UP_AtMSCtrl_DOWN_AtC32I
AT2G01029	60.2597	-2.68804	0.547592	-4.90884	9.16188e-07	1.32843e-05	21	13	91	115	18.9947	13.2857	98.7382	110.02	100	UP_AtMSCtrl_DOWN_AtC32I
AT3G24590	575.091	1.33085	0.271194	4.90736	9.23085e-07	1.33729e-05	964	757	346	292	871.949	773.638	375.422	279.356	100	DOWN_AtMSCtrl_UP_AtC32I
AT3G04260	877.769	-1.27316	0.259451	-4.90714	9.24132e-07	1.33767e-05	617	459	1307	1114	558.083	469.088	1418.14	1065.76	100	UP_AtMSCtrl_DOWN_AtC32I
AT3G25690	5378.78	-1.22991	0.250762	-4.90471	9.35668e-07	1.35322e-05	4323	2466	7078	7740	3910.2	2520.2	7679.88	7404.85	100	UP_AtMSCtrl_DOWN_AtC32I
AT5G65110	1975.91	-1.09045	0.222557	-4.89963	9.60154e-07	1.38745e-05	1301	1320	2559	2719	1176.77	1349.01	2776.6	2601.26	100	UP_AtMSCtrl_DOWN_AtC32I
AT2G17110	488.959	-1.40776	0.287442	-4.89754	9.70457e-07	1.40115e-05	353	211	680	714	319.292	215.638	737.824	683.083	100	UP_AtMSCtrl_DOWN_AtC32I
AT1G79700	1326.14	-1.47562	0.301346	-4.89677	9.74267e-07	1.40546e-05	527	907	1696	2154	476.677	926.935	1840.22	2060.73	100	UP_AtMSCtrl_DOWN_AtC32I
AT4G19880	971.669	-1.24134	0.253645	-4.89399	9.88123e-07	1.42424e-05	739	476	1263	1423	668.434	486.462	1370.4	1361.38	100	UP_AtMSCtrl_DOWN_AtC32I
AT1G12250	1221.58	1.38804	0.283663	4.89328	9.91682e-07	1.42816e-05	1446	2180	586	747	1307.92	2227.91	635.83	714.654	100	DOWN_AtMSCtrl_UP_AtC32I
AT5G14170	2047.26	-1.12546	0.230017	-4.89295	9.93358e-07	1.42936e-05	1300	1368	2790	2705	1175.86	1398.07	3027.25	2587.87	100	UP_AtMSCtrl_DOWN_AtC32I
AT1G19220	363.782	-1.59936	0.326941	-4.89188	9.98757e-07	1.43591e-05	254	128	545	526	229.746	130.813	591.344	503.224	100	UP_AtMSCtrl_DOWN_AtC32I
AT5G52040	1645.09	-1.43172	0.2928	-4.88975	1.00965e-06	1.45035e-05	679	1141	2187	2537	614.163	1166.08	2372.97	2427.14	100	UP_AtMSCtrl_DOWN_AtC32I
AT2G12400	129.362	1.91708	0.392502	4.88425	1.03822e-06	1.49013e-05	249	180	46	61	225.223	183.956	49.9116	58.3586	100	DOWN_AtMSCtrl_UP_AtC32I
AT4G11175	642.542	1.24808	0.255545	4.884	1.03956e-06	1.49079e-05	905	969	341	409	818.582	990.297	369.997	391.29	100	DOWN_AtMSCtrl_UP_AtC32I
AT5G62520	46.6683	3.55389	0.727956	4.88201	1.05011e-06	1.50466e-05	104	76	12	2	94.0691	77.6704	13.0204	1.9134	100	DOWN_AtMSCtrl_UP_AtC32I
AT2G04270	564.226	-1.33791	0.27414	-4.8804	1.05872e-06	1.51462e-05	412	261	721	873	372.659	266.736	782.31	835.198	100	UP_AtMSCtrl_DOWN_AtC32I
AT3G21640	324.644	-1.62725	0.333427	-4.88037	1.05884e-06	1.51462e-05	224	112	484	477	202.61	114.462	525.157	456.345	100	UP_AtMSCtrl_DOWN_AtC32I
AT5G66530	1751.03	1.07637	0.220596	4.87936	1.06428e-06	1.52112e-05	2742	2222	1037	1179	2480.17	2270.84	1125.18	1127.95	100	DOWN_AtMSCtrl_UP_AtC32I
AT5G19450	1261.24	-1.13851	0.233369	-4.87858	1.0685e-06	1.52587e-05	942	708	1531	1890	852.049	723.561	1661.19	1808.16	100	UP_AtMSCtrl_DOWN_AtC32I
AT1G05140	1584.9	1.14613	0.235011	4.87693	1.07748e-06	1.5374e-05	2258	2274	1003	925	2042.39	2323.98	1088.29	884.946	100	DOWN_AtMSCtrl_UP_AtC32I
AT5G38660	2598.96	1.09731	0.225079	4.87523	1.08684e-06	1.54945e-05	3545	3795	1452	1814	3206.49	3878.41	1575.47	1735.45	100	DOWN_AtMSCtrl_UP_AtC32I
AT1G03475	2716.21	1.03962	0.213467	4.87016	1.11509e-06	1.5884e-05	3914	3688	1621	1878	3540.26	3769.06	1758.84	1796.68	100	DOWN_AtMSCtrl_UP_AtC32I
AT5G18590	980.044	-1.42922	0.293584	-4.8682	1.12622e-06	1.60291e-05	756	369	1317	1495	683.81	377.11	1428.99	1430.26	100	UP_AtMSCtrl_DOWN_AtC32I
AT3G48500	525.557	-1.28725	0.264627	-4.86439	1.14811e-06	1.6327e-05	304	329	712	751	274.971	336.231	772.545	718.481	100	UP_AtMSCtrl_DOWN_AtC32I
AT4G17340	3039.55	1.02593	0.21099	4.86246	1.15938e-06	1.64734e-05	4511	3986	1853	2084	4080.25	4073.61	2010.57	1993.76	100	DOWN_AtMSCtrl_UP_AtC32I
AT1G01780	419.685	-1.37614	0.283152	-4.8601	1.17329e-06	1.66572e-05	243	242	488	713	219.796	247.319	529.497	682.126	100	UP_AtMSCtrl_DOWN_AtC32I
AT1G33390	159.224	-1.74196	0.358508	-4.85892	1.1803e-06	1.67427e-05	84	69	243	237	75.9789	70.5165	263.663	226.738	100	UP_AtMSCtrl_DOWN_AtC32I
AT5G16630	614.408	-1.44007	0.296502	-4.85687	1.19254e-06	1.69023e-05	460	240	802	968	416.075	245.275	870.198	926.084	100	UP_AtMSCtrl_DOWN_AtC32I
AT1G50320	3302.84	1.0284	0.211782	4.85594	1.19815e-06	1.69677e-05	4719	4498	2004	2270	4268.39	4596.86	2174.41	2171.71	100	DOWN_AtMSCtrl_UP_AtC32I
AT2G13820	94.6842	2.20011	0.453188	4.85473	1.2055e-06	1.70575e-05	190	136	37	29	171.857	138.989	40.1463	27.7443	100	DOWN_AtMSCtrl_UP_AtC32I
AT3G43740	600.803	1.21659	0.250654	4.85368	1.21192e-06	1.71341e-05	895	852	333	378	809.537	870.726	361.317	361.632	100	DOWN_AtMSCtrl_UP_AtC32I
AT2G14890	561.983	1.36199	0.28074	4.8514	1.22591e-06	1.73176e-05	974	721	340	273	880.994	736.847	368.912	261.179	100	DOWN_AtMSCtrl_UP_AtC32I
AT5G20090	1152.54	1.11444	0.230126	4.84276	1.28048e-06	1.80734e-05	1830	1466	683	748	1655.26	1498.22	741.079	715.611	100	DOWN_AtMSCtrl_UP_AtC32I
AT1G28600	821.109	1.3018	0.269036	4.83874	1.30665e-06	1.84274e-05	1183	1239	515	407	1070.04	1266.23	558.793	389.376	100	DOWN_AtMSCtrl_UP_AtC32I
AT3G15190	3984.9	1.09668	0.226673	4.83818	1.31036e-06	1.84645e-05	5294	5942	2463	2515	4788.48	6072.6	2672.44	2406.1	100	DOWN_AtMSCtrl_UP_AtC32I
AT4G18830	168.708	-1.68939	0.349195	-4.83796	1.3118e-06	1.84695e-05	94	73	235	272	85.024	74.6045	254.983	260.222	100	UP_AtMSCtrl_DOWN_AtC32I
AT1G19110	1570.66	-1.08265	0.223923	-4.83493	1.33192e-06	1.87366e-05	1179	928	1968	2229	1066.42	948.396	2135.35	2132.48	100	UP_AtMSCtrl_DOWN_AtC32I
AT2G40765	439.077	1.39027	0.287556	4.83477	1.33298e-06	1.87366e-05	598	715	206	273	540.898	730.715	223.517	261.179	100	DOWN_AtMSCtrl_UP_AtC32I
AT2G36830	14080.4	1.04573	0.216362	4.83325	1.34323e-06	1.88651e-05	21595	18013	9352	8605	19532.9	18408.9	10147.2	8232.39	100	DOWN_AtMSCtrl_UP_AtC32I
AT1G72060	1179.04	-1.17461	0.243115	-4.8315	1.35511e-06	1.90163e-05	695	802	1482	1735	628.635	819.627	1608.02	1659.87	100	UP_AtMSCtrl_DOWN_AtC32I
AT3G06455	155.831	-1.79562	0.371703	-4.8308	1.35986e-06	1.90672e-05	84	62	193	287	75.9789	63.3627	209.412	274.573	100	UP_AtMSCtrl_DOWN_AtC32I
AT1G76670	1917.22	1.05365	0.218149	4.82995	1.36565e-06	1.91326e-05	2948	2455	1165	1285	2666.5	2508.96	1264.07	1229.36	100	DOWN_AtMSCtrl_UP_AtC32I
AT4G34720	3849.02	1.02602	0.212499	4.82834	1.37673e-06	1.92637e-05	5983	4808	2402	2576	5411.69	4913.67	2606.25	2464.46	100	DOWN_AtMSCtrl_UP_AtC32I
AT5G24350	552.816	-1.68236	0.348439	-4.82827	1.37727e-06	1.92637e-05	405	155	737	927	366.327	158.407	799.671	886.86	100	UP_AtMSCtrl_DOWN_AtC32I
AT3G12980	465.535	-1.33575	0.276717	-4.82713	1.38516e-06	1.93581e-05	333	222	622	689	301.202	226.879	674.892	659.165	100	UP_AtMSCtrl_DOWN_AtC32I
AT5G63310	1891.02	1.11402	0.230794	4.82689	1.38682e-06	1.93654e-05	3122	2299	1177	1164	2823.88	2349.53	1277.09	1113.6	100	DOWN_AtMSCtrl_UP_AtC32I
AT4G39840	492.172	1.33281	0.276236	4.82489	1.40078e-06	1.95442e-05	763	704	219	336	690.142	719.473	237.623	321.451	100	DOWN_AtMSCtrl_UP_AtC32I
AT1G53250	139.767	-1.85354	0.38424	-4.8239	1.40781e-06	1.96262e-05	75	52	223	205	67.8383	53.1429	241.963	196.123	100	UP_AtMSCtrl_DOWN_AtC32I
AT3G18640	308.918	-1.56877	0.325271	-4.82297	1.41436e-06	1.97015e-05	214	115	443	464	193.565	117.528	480.67	443.908	100	UP_AtMSCtrl_DOWN_AtC32I
AT3G63070	606.399	-1.35702	0.2814	-4.8224	1.41838e-06	1.97412e-05	453	265	835	877	409.743	270.824	906.004	839.025	100	UP_AtMSCtrl_DOWN_AtC32I
AT3G26400	349.49	-1.35397	0.280785	-4.82208	1.42072e-06	1.97577e-05	211	198	449	541	190.852	202.352	487.181	517.574	100	UP_AtMSCtrl_DOWN_AtC32I
AT3G09670	148.444	-1.93902	0.402153	-4.82159	1.42417e-06	1.97894e-05	79	50	265	192	71.4564	51.0989	287.534	183.686	100	UP_AtMSCtrl_DOWN_AtC32I
AT1G55810	1317.92	-1.12042	0.232444	-4.82016	1.43445e-06	1.9916e-05	911	819	1514	2057	824.009	837.001	1642.74	1967.93	100	UP_AtMSCtrl_DOWN_AtC32I
AT1G60900	1084.81	-1.11532	0.231451	-4.81881	1.44414e-06	2.00342e-05	739	687	1305	1623	668.434	702.099	1415.97	1552.72	100	UP_AtMSCtrl_DOWN_AtC32I
AT2G30260	1166.57	-1.23152	0.255619	-4.81778	1.45167e-06	2.0114e-05	634	803	1560	1651	573.46	820.649	1692.65	1579.51	100	UP_AtMSCtrl_DOWN_AtC32I
AT3G11120	268.957	2.0764	0.430994	4.8177	1.45226e-06	2.0114e-05	474	432	44	165	428.738	441.495	47.7415	157.855	100	DOWN_AtMSCtrl_UP_AtC32I
AT1G06530	995.849	-1.49552	0.310456	-4.81717	1.45612e-06	2.01511e-05	392	674	1499	1373	354.568	688.814	1626.47	1313.55	100	UP_AtMSCtrl_DOWN_AtC32I
AT3G09840	6148.66	-1.03438	0.214754	-4.81656	1.46054e-06	2.01959e-05	4228	4153	8156	8024	3824.27	4244.28	8849.54	7676.55	100	UP_AtMSCtrl_DOWN_AtC32I
AT2G46540	467.659	1.28127	0.266076	4.81542	1.46892e-06	2.02623e-05	689	687	261	274	623.208	702.099	283.194	262.135	100	DOWN_AtMSCtrl_UP_AtC32I
AT3G52850	2560.37	-1.14847	0.238495	-4.81547	1.46851e-06	2.02623e-05	2029	1319	3412	3508	1835.25	1347.99	3702.14	3356.1	100	UP_AtMSCtrl_DOWN_AtC32I
AT5G55960	673.811	1.18872	0.246853	4.8155	1.46834e-06	2.02623e-05	1079	878	389	418	975.967	897.297	422.078	399.9	100	DOWN_AtMSCtrl_UP_AtC32I
AT2G36880	1346.09	1.09595	0.227645	4.81432	1.47705e-06	2.03415e-05	2130	1704	820	864	1926.61	1741.45	889.728	826.588	100	DOWN_AtMSCtrl_UP_AtC32I
AT2G41500	422.829	-1.35958	0.282402	-4.81434	1.47689e-06	2.03415e-05	298	200	585	609	269.544	204.396	634.745	582.63	100	UP_AtMSCtrl_DOWN_AtC32I
AT1G71080	840.366	-1.40504	0.291884	-4.81368	1.48177e-06	2.039e-05	383	563	1253	1129	346.428	575.374	1359.55	1080.11	100	UP_AtMSCtrl_DOWN_AtC32I
AT1G76580	396.671	-1.66723	0.346394	-4.81309	1.48617e-06	2.0434e-05	285	119	566	620	257.786	121.615	614.13	593.153	100	UP_AtMSCtrl_DOWN_AtC32I
AT2G16600	6423.23	1.0649	0.221267	4.81274	1.48872e-06	2.04524e-05	8475	9509	3804	4371	7665.73	9718	4127.47	4181.73	100	DOWN_AtMSCtrl_UP_AtC32I
AT5G50380	689.494	-1.25178	0.260194	-4.81094	1.50219e-06	2.06208e-05	453	397	1017	877	409.743	405.726	1103.48	839.025	100	UP_AtMSCtrl_DOWN_AtC32I
AT4G33660	522.483	1.69286	0.351995	4.80933	1.51434e-06	2.07709e-05	1156	539	170	323	1045.61	550.847	184.456	309.014	100	DOWN_AtMSCtrl_UP_AtC32I
AT2G35940	2526.52	-1.09009	0.226722	-4.80806	1.52403e-06	2.0887e-05	1639	1710	3416	3313	1482.49	1747.58	3706.48	3169.54	100	UP_AtMSCtrl_DOWN_AtC32I
AT1G56140	585.28	-1.21367	0.252453	-4.8075	1.52829e-06	2.09285e-05	399	337	722	891	360.9	344.407	783.395	852.419	100	UP_AtMSCtrl_DOWN_AtC32I
AT1G43850	1377.88	-1.2504	0.260118	-4.80706	1.53166e-06	2.09577e-05	1075	644	1921	1878	972.349	658.154	2084.35	1796.68	100	UP_AtMSCtrl_DOWN_AtC32I
AT3G17185	70.4725	2.55303	0.531319	4.80508	1.54688e-06	2.1132e-05	161	93	23	17	145.626	95.044	24.9558	16.2639	100	DOWN_AtMSCtrl_UP_AtC32I
AT4G15920	499.268	1.24301	0.258677	4.80524	1.54569e-06	2.1132e-05	785	679	268	316	710.041	693.924	290.789	302.317	100	DOWN_AtMSCtrl_UP_AtC32I
AT2G29310	597.337	1.23264	0.25655	4.80468	1.54996e-06	2.11571e-05	902	842	300	405	815.869	860.506	325.51	387.463	100	DOWN_AtMSCtrl_UP_AtC32I
AT5G39610	946.25	-1.2471	0.25959	-4.8041	1.55445e-06	2.12005e-05	511	646	1201	1421	462.205	660.198	1303.13	1359.47	100	UP_AtMSCtrl_DOWN_AtC32I
AT5G66540	161.321	-1.74303	0.362832	-4.80395	1.55564e-06	2.12005e-05	86	69	257	228	77.7879	70.5165	278.854	218.127	100	UP_AtMSCtrl_DOWN_AtC32I
AT4G03430	668.881	-1.18551	0.246863	-4.80231	1.56843e-06	2.13578e-05	439	411	891	932	397.08	420.033	966.766	891.643	100	UP_AtMSCtrl_DOWN_AtC32I
AT2G43560	1217.44	1.26544	0.263646	4.79977	1.58851e-06	2.1614e-05	1890	1693	520	905	1709.53	1730.21	564.218	865.812	100	DOWN_AtMSCtrl_UP_AtC32I
AT1G01930	320.139	-1.38638	0.288868	-4.79934	1.59187e-06	2.16423e-05	203	167	404	510	183.616	170.67	438.354	487.916	100	UP_AtMSCtrl_DOWN_AtC32I
AT3G44990	49.0946	3.14113	0.655019	4.79549	1.62282e-06	2.20454e-05	80	102	5	15	72.3609	104.242	5.42517	14.3505	100	DOWN_AtMSCtrl_UP_AtC32I
AT2G32060	651.68	1.29898	0.270891	4.7952	1.62513e-06	2.20592e-05	896	1021	305	441	810.442	1043.44	330.936	421.904	100	DOWN_AtMSCtrl_UP_AtC32I
AT3G30775	15049.9	-1.24088	0.258805	-4.79466	1.62955e-06	2.2084e-05	7483	10891	20443	21030	6768.46	11130.4	22181.4	20119.4	100	UP_AtMSCtrl_DOWN_AtC32I
AT5G20730	943.588	-1.18564	0.247283	-4.79468	1.62932e-06	2.2084e-05	718	492	1206	1373	649.439	502.814	1308.55	1313.55	100	UP_AtMSCtrl_DOWN_AtC32I
AT4G23570	578.316	-1.22846	0.25623	-4.79436	1.63197e-06	2.20991e-05	355	363	772	819	321.101	370.978	837.647	783.536	100	UP_AtMSCtrl_DOWN_AtC32I
AT4G25580	49.2364	-3.33363	0.695488	-4.79322	1.64123e-06	2.22069e-05	3	15	82	94	2.71353	15.3297	88.9728	89.9297	100	UP_AtMSCtrl_DOWN_AtC32I
AT5G44080	393.641	-1.38854	0.289761	-4.79201	1.65116e-06	2.23235e-05	256	199	598	513	231.555	203.374	648.851	490.787	100	UP_AtMSCtrl_DOWN_AtC32I
AT1G51700	637.154	1.31431	0.274279	4.79185	1.65252e-06	2.23241e-05	1043	855	399	312	943.405	873.792	432.929	298.49	100	DOWN_AtMSCtrl_UP_AtC32I
AT2G03680	2493.35	1.03734	0.216532	4.79071	1.66189e-06	2.24329e-05	3578	3395	1568	1637	3236.34	3469.62	1701.33	1566.12	100	DOWN_AtMSCtrl_UP_AtC32I
AT3G10940	226.968	1.57447	0.32878	4.78884	1.67749e-06	2.26256e-05	426	288	101	124	385.322	294.33	109.588	118.631	100	DOWN_AtMSCtrl_UP_AtC32I
AT5G27700	1613.67	1.14615	0.239443	4.78672	1.69532e-06	2.28478e-05	2561	2084	800	1192	2316.45	2129.8	868.028	1140.39	100	DOWN_AtMSCtrl_UP_AtC32I
AT5G13140	986.63	1.12099	0.234212	4.78621	1.69963e-06	2.28878e-05	1572	1254	569	654	1421.89	1281.56	617.385	625.681	100	DOWN_AtMSCtrl_UP_AtC32I
AT5G41520	3049.76	1.03297	0.215919	4.78405	1.71798e-06	2.31166e-05	4407	4118	1734	2219	3986.18	4208.51	1881.45	2122.91	100	DOWN_AtMSCtrl_UP_AtC32I
AT1G13110	3798.73	-1.12164	0.2345	-4.78313	1.72586e-06	2.32043e-05	3054	1978	4952	5266	2762.38	2021.47	5373.09	5037.98	100	UP_AtMSCtrl_DOWN_AtC32I
AT3G05180	156.743	1.77001	0.370065	4.78296	1.72731e-06	2.32055e-05	282	225	55	86	255.072	229.945	59.6769	82.2761	100	DOWN_AtMSCtrl_UP_AtC32I
AT1G19920	886.077	1.15134	0.240728	4.78273	1.72932e-06	2.3214e-05	1440	1117	485	600	1302.5	1141.55	526.242	574.019	100	DOWN_AtMSCtrl_UP_AtC32I
AT2G38770	593.748	-1.28718	0.269158	-4.78224	1.73356e-06	2.32527e-05	433	292	717	948	391.653	298.418	777.97	906.95	100	UP_AtMSCtrl_DOWN_AtC32I
AT2G42770	443.768	1.35109	0.282574	4.78138	1.741e-06	2.33341e-05	730	602	195	301	660.293	615.231	211.582	287.966	100	DOWN_AtMSCtrl_UP_AtC32I
AT4G38270	460.88	-1.26922	0.265478	-4.78088	1.74526e-06	2.33543e-05	306	258	634	643	276.78	263.671	687.912	615.157	100	UP_AtMSCtrl_DOWN_AtC32I
AT5G10060	561.542	-1.37292	0.287162	-4.78098	1.74447e-06	2.33543e-05	419	241	710	889	378.99	246.297	770.375	850.505	100	UP_AtMSCtrl_DOWN_AtC32I
AT1G23740	537.331	1.28009	0.267982	4.77677	1.78131e-06	2.3818e-05	742	833	300	315	671.147	851.308	325.51	301.36	100	DOWN_AtMSCtrl_UP_AtC32I
AT4G00880	389.028	1.33952	0.280484	4.77575	1.79041e-06	2.39209e-05	666	502	191	244	602.404	513.033	207.242	233.435	100	DOWN_AtMSCtrl_UP_AtC32I
AT4G00760	289.718	-1.56362	0.327425	-4.77551	1.79249e-06	2.39238e-05	197	112	361	496	178.189	114.462	391.698	474.523	100	UP_AtMSCtrl_DOWN_AtC32I
AT4G27520	2430.84	1.06826	0.2237	4.77541	1.79344e-06	2.39238e-05	3822	3059	1567	1505	3457.04	3126.23	1700.25	1439.83	100	DOWN_AtMSCtrl_UP_AtC32I
AT1G54780	4115.21	1.00521	0.210509	4.77513	1.79592e-06	2.39329e-05	5951	5484	2425	2971	5382.74	5604.53	2631.21	2842.35	100	DOWN_AtMSCtrl_UP_AtC32I
AT5G18660	692.9	1.51084	0.316405	4.77501	1.79694e-06	2.39329e-05	1486	692	357	348	1344.1	707.209	387.357	332.931	100	DOWN_AtMSCtrl_UP_AtC32I
AT5G61140	848.809	-1.36223	0.28542	-4.77272	1.81758e-06	2.41888e-05	653	352	1040	1376	590.646	359.737	1128.44	1316.42	100	UP_AtMSCtrl_DOWN_AtC32I
AT1G03365	247.634	-1.59332	0.333875	-4.77221	1.82215e-06	2.42307e-05	166	94	343	389	150.149	96.066	372.167	372.156	100	UP_AtMSCtrl_DOWN_AtC32I
AT3G48100	201.66	1.63021	0.341643	4.77168	1.82697e-06	2.42569e-05	306	326	79	116	276.78	333.165	85.7177	110.977	100	DOWN_AtMSCtrl_UP_AtC32I
AT5G28500	2420.33	1.03673	0.217264	4.77174	1.82641e-06	2.42569e-05	3597	3185	1546	1563	3253.53	3255	1677.46	1495.32	100	DOWN_AtMSCtrl_UP_AtC32I
AT4G27030	244.788	1.58609	0.332458	4.7708	1.83494e-06	2.43438e-05	432	336	135	103	390.749	343.385	146.48	98.54	100	DOWN_AtMSCtrl_UP_AtC32I
AT5G09410	686.279	-1.4425	0.302402	-4.77015	1.8409e-06	2.44038e-05	522	260	858	1125	472.155	265.714	930.96	1076.29	100	UP_AtMSCtrl_DOWN_AtC32I
AT2G34750	2358.74	-1.24086	0.260191	-4.76905	1.85099e-06	2.45184e-05	1903	1060	3127	3384	1721.28	1083.3	3392.9	3237.47	100	UP_AtMSCtrl_DOWN_AtC32I
AT5G12410	490.735	-1.24403	0.260874	-4.7687	1.85422e-06	2.45421e-05	329	279	609	752	297.584	285.132	660.786	719.438	100	UP_AtMSCtrl_DOWN_AtC32I
AT1G74090	652.408	1.17416	0.246308	4.76704	1.8695e-06	2.46867e-05	1014	872	362	427	917.174	891.165	392.783	408.51	100	DOWN_AtMSCtrl_UP_AtC32I
AT2G33580	219.441	1.71011	0.358724	4.7672	1.86803e-06	2.46867e-05	388	314	121	78	350.95	320.901	131.289	74.6225	100	DOWN_AtMSCtrl_UP_AtC32I
AT3G58730	2077.19	1.05553	0.221419	4.76709	1.86903e-06	2.46867e-05	2887	2934	1268	1383	2611.32	2998.49	1375.82	1323.11	100	DOWN_AtMSCtrl_UP_AtC32I
AT4G31430	1150.79	-1.20423	0.252787	-4.76383	1.89953e-06	2.50638e-05	648	790	1565	1580	586.123	807.363	1698.08	1511.58	100	UP_AtMSCtrl_DOWN_AtC32I
AT1G80410	1765.73	-1.19617	0.251207	-4.76168	1.91986e-06	2.53123e-05	1390	869	2446	2366	1257.27	888.1	2653.99	2263.55	100	UP_AtMSCtrl_DOWN_AtC32I
AT3G20100	667.626	1.25373	0.263421	4.75944	1.94131e-06	2.55753e-05	959	992	410	360	867.426	1013.8	444.864	344.412	100	DOWN_AtMSCtrl_UP_AtC32I
AT4G17030	145.653	1.75024	0.367825	4.75834	1.95188e-06	2.56947e-05	240	227	64	67	217.083	231.989	69.4422	64.0988	100	DOWN_AtMSCtrl_UP_AtC32I
AT3G18710	134.299	1.8979	0.398896	4.75788	1.95635e-06	2.57337e-05	220	220	41	72	198.992	224.835	44.4864	68.8823	100	DOWN_AtMSCtrl_UP_AtC32I
AT1G18170	1219.1	1.09057	0.229293	4.75621	1.9726e-06	2.59274e-05	1732	1714	728	803	1566.61	1751.67	789.905	768.229	100	DOWN_AtMSCtrl_UP_AtC32I
AT2G30150	276.242	1.48578	0.312416	4.75578	1.97677e-06	2.59621e-05	488	365	117	171	441.401	373.022	126.949	163.596	100	DOWN_AtMSCtrl_UP_AtC32I
AT1G19715	969.078	-1.34893	0.283781	-4.75344	1.99989e-06	2.62454e-05	759	397	1238	1506	686.524	405.726	1343.27	1440.79	100	UP_AtMSCtrl_DOWN_AtC32I
AT3G13750	43113.5	-0.95909	0.201887	-4.75063	2.02781e-06	2.65913e-05	32088	28917	53561	58286	29023.9	29552.6	58115.5	55762.1	100	UP_AtMSCtrl_DOWN_AtC32I
AT3G55170	301.273	1.54806	0.325882	4.75038	2.03037e-06	2.66044e-05	400	525	124	180	361.804	536.539	134.544	172.206	100	DOWN_AtMSCtrl_UP_AtC32I
AT3G61220	151.245	1.72732	0.363864	4.74716	2.06294e-06	2.69895e-05	273	213	65	73	246.931	217.681	70.5273	69.839	100	DOWN_AtMSCtrl_UP_AtC32I
AT4G01120	1009.31	-1.28206	0.270061	-4.74728	2.06167e-06	2.69895e-05	527	685	1461	1333	476.677	700.055	1585.24	1275.28	100	UP_AtMSCtrl_DOWN_AtC32I
AT3G21055	35738.1	1.19392	0.251532	4.74659	2.06877e-06	2.70451e-05	43155	59138	21697	20841	39034.2	60437.8	23542	19938.6	100	DOWN_AtMSCtrl_UP_AtC32I
AT1G35560	361.555	1.35395	0.28526	4.74638	2.07088e-06	2.70518e-05	539	540	203	195	487.531	551.869	220.262	186.556	100	DOWN_AtMSCtrl_UP_AtC32I
AT4G14960	7738.89	1.08262	0.228194	4.7443	2.0923e-06	2.73106e-05	13228	8867	4817	4915	11964.9	9061.89	5226.61	4702.17	100	DOWN_AtMSCtrl_UP_AtC32I
AT1G72940	614.182	1.18853	0.250734	4.7402	2.13511e-06	2.78399e-05	897	877	343	394	811.346	896.275	372.167	376.939	100	DOWN_AtMSCtrl_UP_AtC32I
AT1G76960	136.226	1.79469	0.37862	4.7401	2.13612e-06	2.78399e-05	218	221	55	65	197.183	225.857	59.6769	62.1854	100	DOWN_AtMSCtrl_UP_AtC32I
AT1G12270	548.568	-1.218	0.256986	-4.73955	2.14192e-06	2.78728e-05	351	335	670	844	317.483	342.363	726.973	807.454	100	UP_AtMSCtrl_DOWN_AtC32I
AT5G51110	5728.16	0.982886	0.207376	4.73964	2.14095e-06	2.78728e-05	8252	7584	3454	4129	7464.02	7750.69	3747.71	3950.21	100	DOWN_AtMSCtrl_UP_AtC32I
AT3G53030	794.9	-1.17945	0.248874	-4.73914	2.14623e-06	2.79075e-05	514	498	1115	1041	464.919	508.945	1209.81	995.923	100	UP_AtMSCtrl_DOWN_AtC32I
AT5G44280	114.551	-1.90057	0.401174	-4.73752	2.1635e-06	2.81106e-05	55	46	170	185	49.7481	47.011	184.456	176.989	100	UP_AtMSCtrl_DOWN_AtC32I
AT1G70490	1964.24	1.15144	0.243067	4.73713	2.16766e-06	2.81431e-05	2793	2830	953	1468	2526.3	2892.2	1034.04	1404.43	100	DOWN_AtMSCtrl_UP_AtC32I
AT1G59610	2106.01	-1.05336	0.222415	-4.73602	2.17954e-06	2.82758e-05	1626	1241	2537	3065	1470.73	1268.28	2752.73	2932.28	100	UP_AtMSCtrl_DOWN_AtC32I
AT2G26430	1345.96	-1.12605	0.2379	-4.73331	2.20892e-06	2.86352e-05	849	904	1835	1778	767.93	923.869	1991.04	1701.01	100	UP_AtMSCtrl_DOWN_AtC32I
AT1G20823	267.326	1.48198	0.313141	4.73263	2.21634e-06	2.86877e-05	378	436	131	146	341.905	445.583	142.14	139.678	100	DOWN_AtMSCtrl_UP_AtC32I
AT2G26260	151.783	1.80429	0.381242	4.73267	2.21583e-06	2.86877e-05	296	200	53	81	267.735	204.396	57.5068	77.4926	100	DOWN_AtMSCtrl_UP_AtC32I
AT1G28140	1381.15	1.08951	0.230243	4.73199	2.22333e-06	2.87343e-05	2186	1743	760	984	1977.26	1781.31	824.626	941.392	100	DOWN_AtMSCtrl_UP_AtC32I
AT3G46510	2990.45	-1.05907	0.223807	-4.73206	2.22249e-06	2.87343e-05	1967	2055	3983	3931	1779.17	2100.17	4321.69	3760.78	100	UP_AtMSCtrl_DOWN_AtC32I
AT5G58200	2127.1	-1.14755	0.242576	-4.73066	2.23786e-06	2.89001e-05	1246	1487	2490	3303	1127.02	1519.68	2701.74	3159.98	100	UP_AtMSCtrl_DOWN_AtC32I
AT4G05420	1521.28	-1.25991	0.266337	-4.7305	2.23972e-06	2.89022e-05	1215	678	2069	2141	1098.98	692.902	2244.94	2048.29	100	UP_AtMSCtrl_DOWN_AtC32I
AT5G44660	544.205	-1.33213	0.281668	-4.72942	2.25164e-06	2.9034e-05	398	253	647	895	359.995	258.561	702.017	856.245	100	UP_AtMSCtrl_DOWN_AtC32I
AT5G64270	1942.99	-1.10752	0.234287	-4.7272	2.27632e-06	2.93301e-05	1495	1087	2662	2530	1352.24	1110.89	2888.36	2420.45	100	UP_AtMSCtrl_DOWN_AtC32I
AT3G02040	1520.86	-1.07309	0.22703	-4.72666	2.28245e-06	2.93867e-05	1010	1024	1968	2078	913.556	1046.51	2135.35	1988.02	100	UP_AtMSCtrl_DOWN_AtC32I
AT1G32550	545.815	1.22927	0.260084	4.72642	2.28512e-06	2.93989e-05	778	809	308	333	703.71	826.781	334.191	318.581	100	DOWN_AtMSCtrl_UP_AtC32I
AT3G28080	670.865	1.30637	0.27643	4.72587	2.29134e-06	2.94344e-05	1077	917	284	485	974.158	937.155	308.15	463.999	100	DOWN_AtMSCtrl_UP_AtC32I
AT4G14510	231.243	-1.69886	0.359469	-4.72602	2.28963e-06	2.94344e-05	141	88	399	287	127.536	89.9341	432.929	274.573	100	UP_AtMSCtrl_DOWN_AtC32I
AT1G72020	1391.22	1.272	0.26924	4.72439	2.30812e-06	2.96275e-05	1679	2365	723	883	1518.67	2416.98	784.48	844.765	100	DOWN_AtMSCtrl_UP_AtC32I
AT4G26600	126.053	-1.90975	0.404269	-4.72395	2.31302e-06	2.96681e-05	65	46	212	176	58.7932	47.011	230.027	168.379	100	UP_AtMSCtrl_DOWN_AtC32I
AT1G79190	300.343	-1.43939	0.304759	-4.72306	2.32327e-06	2.9777e-05	205	135	393	472	185.425	137.967	426.419	451.562	100	UP_AtMSCtrl_DOWN_AtC32I
AT1G80850	104.365	2.2589	0.478478	4.72101	2.34674e-06	3.00553e-05	243	123	24	48	219.796	125.703	26.0408	45.9215	100	DOWN_AtMSCtrl_UP_AtC32I
AT5G44420	986.756	-1.56472	0.331689	-4.71742	2.3885e-06	3.05671e-05	336	679	1317	1589	303.916	693.924	1428.99	1520.19	100	UP_AtMSCtrl_DOWN_AtC32I
AT4G21570	839.718	1.14002	0.241811	4.71451	2.42296e-06	3.09847e-05	1369	1049	492	538	1238.28	1072.06	533.837	514.704	100	DOWN_AtMSCtrl_UP_AtC32I
AT1G02960	260.824	-1.54227	0.327301	-4.71208	2.45196e-06	3.13321e-05	167	113	305	466	151.053	115.484	330.936	445.822	100	UP_AtMSCtrl_DOWN_AtC32I
AT3G12260	1263.38	1.08936	0.231359	4.70855	2.49486e-06	3.18562e-05	1765	1802	720	872	1596.46	1841.61	781.225	834.241	100	DOWN_AtMSCtrl_UP_AtC32I
AT1G74070	1054.09	1.12137	0.2382	4.70766	2.50582e-06	3.19722e-05	1464	1531	586	723	1324.2	1564.65	635.83	691.693	100	DOWN_AtMSCtrl_UP_AtC32I
AT4G19610	286.154	-1.42733	0.30321	-4.70741	2.50886e-06	3.1987e-05	168	155	343	483	151.958	158.407	372.167	462.086	100	UP_AtMSCtrl_DOWN_AtC32I
AT5G45480	514.921	-1.45453	0.309002	-4.70719	2.5116e-06	3.1998e-05	389	194	685	801	351.855	198.264	743.249	766.316	100	UP_AtMSCtrl_DOWN_AtC32I
AT3G49720	1119.79	1.21724	0.258741	4.70448	2.54509e-06	3.24003e-05	2039	1260	590	739	1844.3	1287.69	640.17	707	100	DOWN_AtMSCtrl_UP_AtC32I
AT5G41940	853.927	-1.11504	0.237105	-4.70272	2.56722e-06	3.26576e-05	604	521	1116	1177	546.325	532.451	1210.9	1126.03	100	UP_AtMSCtrl_DOWN_AtC32I
AT5G08410	1119.59	1.31951	0.280731	4.70026	2.59836e-06	3.30291e-05	1324	1957	572	690	1197.57	2000.01	620.64	660.122	100	DOWN_AtMSCtrl_UP_AtC32I
AT2G15292	412.695	1.36325	0.290146	4.6985	2.62079e-06	3.32893e-05	570	659	191	266	515.571	673.484	207.242	254.482	100	DOWN_AtMSCtrl_UP_AtC32I
AT4G23850	2005.31	-1.08252	0.230593	-4.69451	2.67252e-06	3.39211e-05	1582	1117	2418	2953	1430.94	1141.55	2623.61	2825.13	100	UP_AtMSCtrl_DOWN_AtC32I
AT1G62780	1104.77	1.15064	0.245157	4.6935	2.68565e-06	3.40369e-05	1569	1593	559	800	1419.18	1628.01	606.534	765.359	100	DOWN_AtMSCtrl_UP_AtC32I
AT3G52280	222.893	-1.49621	0.318773	-4.69364	2.68387e-06	3.40369e-05	128	115	321	324	115.777	117.528	348.296	309.97	100	UP_AtMSCtrl_DOWN_AtC32I
AT4G17615	105.875	1.97355	0.420581	4.69244	2.69967e-06	3.41891e-05	179	172	35	50	161.907	175.78	37.9762	47.8349	100	DOWN_AtMSCtrl_UP_AtC32I
AT2G25605	229.825	1.55308	0.330997	4.69213	2.70379e-06	3.42158e-05	390	326	89	143	352.759	333.165	96.5681	136.808	100	DOWN_AtMSCtrl_UP_AtC32I
AT4G21445	411.686	1.44485	0.307997	4.69112	2.7171e-06	3.43586e-05	516	722	195	241	466.728	737.869	211.582	230.564	100	DOWN_AtMSCtrl_UP_AtC32I
AT1G79950	269.027	-1.49863	0.319487	-4.69074	2.72222e-06	3.437e-05	183	113	351	433	165.526	115.484	380.847	414.251	100	UP_AtMSCtrl_DOWN_AtC32I
AT2G28430	240.997	1.48809	0.317249	4.6906	2.72406e-06	3.437e-05	363	374	126	122	328.337	382.22	136.714	116.717	100	DOWN_AtMSCtrl_UP_AtC32I
AT2G38170	8528.91	0.969658	0.20672	4.69069	2.72286e-06	3.437e-05	13015	10579	5247	6103	11772.2	10811.5	5693.18	5838.73	100	DOWN_AtMSCtrl_UP_AtC32I
AT1G30820	2491.1	-1.03831	0.221386	-4.69008	2.73105e-06	3.44326e-05	1696	1692	2896	3720	1534.05	1729.19	3142.26	3558.92	100	UP_AtMSCtrl_DOWN_AtC32I
AT3G23030	1780.75	-1.1055	0.235796	-4.68839	2.75369e-06	3.46821e-05	1099	1239	2369	2396	994.058	1266.23	2570.45	2292.25	100	UP_AtMSCtrl_DOWN_AtC32I
AT5G13590	797.244	-1.4808	0.315851	-4.68829	2.75491e-06	3.46821e-05	622	272	1086	1223	562.606	277.978	1178.35	1170.04	100	UP_AtMSCtrl_DOWN_AtC32I
AT1G69523	272.323	1.48608	0.317102	4.68644	2.78002e-06	3.49723e-05	509	335	123	160	460.396	342.363	133.459	153.072	100	DOWN_AtMSCtrl_UP_AtC32I
AT2G47980	704.737	-1.21507	0.25931	-4.6858	2.78865e-06	3.50181e-05	529	362	855	1090	478.486	369.956	927.705	1042.8	100	UP_AtMSCtrl_DOWN_AtC32I
AT5G48580	529.166	1.26411	0.269768	4.68592	2.78704e-06	3.50181e-05	818	738	326	281	739.89	754.22	353.721	268.832	100	DOWN_AtMSCtrl_UP_AtC32I
AT5G52760	62.9733	2.52779	0.539468	4.68572	2.78983e-06	3.50181e-05	120	104	13	24	108.541	106.286	14.1055	22.9608	100	DOWN_AtMSCtrl_UP_AtC32I
AT1G72170	203.93	1.5371	0.328103	4.6848	2.80232e-06	3.51489e-05	351	283	93	113	317.483	289.22	100.908	108.107	100	DOWN_AtMSCtrl_UP_AtC32I
AT3G51310	713.918	-1.23085	0.262824	-4.68319	2.82441e-06	3.53998e-05	534	362	845	1135	483.009	369.956	916.854	1085.85	100	UP_AtMSCtrl_DOWN_AtC32I
AT5G66790	972.397	-1.10764	0.236652	-4.68047	2.86217e-06	3.58467e-05	649	632	1289	1315	587.028	645.891	1398.61	1258.06	100	UP_AtMSCtrl_DOWN_AtC32I
AT5G44130	2428.85	1.02405	0.218826	4.67972	2.87266e-06	3.59516e-05	3510	3266	1571	1566	3174.83	3337.78	1704.59	1498.19	100	DOWN_AtMSCtrl_UP_AtC32I
AT3G06210	372.878	-1.51578	0.324022	-4.67802	2.89662e-06	3.62248e-05	255	152	608	466	230.65	155.341	659.701	445.822	100	UP_AtMSCtrl_DOWN_AtC32I
AT5G40950	3638.62	0.98278	0.210137	4.67686	2.91303e-06	3.64032e-05	5486	4601	2248	2562	4962.15	4702.12	2439.16	2451.06	100	DOWN_AtMSCtrl_UP_AtC32I
AT5G57020	1398.83	-1.1025	0.235752	-4.67651	2.91793e-06	3.64378e-05	1068	794	1891	1846	966.018	811.451	2051.8	1766.07	100	UP_AtMSCtrl_DOWN_AtC32I
AT3G04160	183.675	-2.04452	0.437216	-4.67623	2.922e-06	3.6442e-05	114	39	220	369	103.114	39.8572	238.708	353.022	100	UP_AtMSCtrl_DOWN_AtC32I
AT3G05210	627.107	-1.18618	0.253664	-4.67619	2.92256e-06	3.6442e-05	460	342	803	911	416.075	349.517	871.283	871.553	100	UP_AtMSCtrl_DOWN_AtC32I
AT1G75660	1648.84	-1.05356	0.225469	-4.67274	2.97205e-06	3.70319e-05	1109	1117	1969	2419	1003.1	1141.55	2136.43	2314.25	100	UP_AtMSCtrl_DOWN_AtC32I
AT4G34890	1288.25	-1.17905	0.252342	-4.67244	2.97649e-06	3.70601e-05	1025	637	1675	1837	927.124	651	1817.43	1757.46	100	UP_AtMSCtrl_DOWN_AtC32I
AT5G24490	9543.05	-1.10809	0.237252	-4.67054	3.00411e-06	3.73767e-05	5543	6931	12735	12812	5013.7	7083.33	13817.9	12257.2	100	UP_AtMSCtrl_DOWN_AtC32I
AT4G20830	1481.82	1.16017	0.248453	4.66956	3.01849e-06	3.75281e-05	2057	2186	966	820	1860.58	2234.05	1048.14	784.493	100	DOWN_AtMSCtrl_UP_AtC32I
AT3G09360	199.275	-1.72809	0.370235	-4.66757	3.04789e-06	3.78262e-05	105	88	208	404	94.9736	89.9341	225.687	386.506	100	UP_AtMSCtrl_DOWN_AtC32I
AT4G14420	638.669	1.19597	0.256218	4.66777	3.0449e-06	3.78262e-05	895	948	376	385	809.537	968.836	407.973	368.329	100	DOWN_AtMSCtrl_UP_AtC32I
AT5G59670	247.664	2.24664	0.481339	4.66748	3.04913e-06	3.78262e-05	718	165	85	84	649.439	168.626	92.2279	80.3627	100	DOWN_AtMSCtrl_UP_AtC32I
AT1G43160	28.2157	5.78461	1.2395	4.6669	3.05779e-06	3.7905e-05	56	59	0	2	50.6526	60.2967	0	1.9134	100	DOWN_AtMSCtrl_UP_AtC32I
AT2G29320	470.863	1.36415	0.292313	4.66675	3.05995e-06	3.7905e-05	689	718	196	328	623.208	733.781	212.667	313.797	100	DOWN_AtMSCtrl_UP_AtC32I
AT3G20390	4412.4	1.01989	0.218598	4.66559	3.0773e-06	3.80922e-05	7118	5266	2791	2928	6438.31	5381.74	3028.33	2801.21	100	DOWN_AtMSCtrl_UP_AtC32I
AT2G46260	1258.92	-1.14904	0.246288	-4.66543	3.07974e-06	3.80947e-05	824	802	1825	1558	745.317	819.627	1980.19	1490.54	100	UP_AtMSCtrl_DOWN_AtC32I
AT1G53200	173.847	-1.65317	0.354419	-4.66445	3.09442e-06	3.81929e-05	105	71	259	258	94.9736	72.5605	281.024	246.828	100	UP_AtMSCtrl_DOWN_AtC32I
AT2G22425	407.323	1.31367	0.281621	4.66467	3.09107e-06	3.81929e-05	566	636	220	239	511.953	649.978	238.708	228.651	100	DOWN_AtMSCtrl_UP_AtC32I
AT2G24940	169.231	10.8184	2.31931	4.66451	3.09356e-06	3.81929e-05	136	542	0	0	123.013	553.912	0	0	100	DOWN_AtMSCtrl_UP_AtC32I
AT2G45620	3600.6	-1.02017	0.218722	-4.66423	3.09773e-06	3.82061e-05	2427	2506	4664	4793	2195.25	2561.08	5060.6	4585.46	100	UP_AtMSCtrl_DOWN_AtC32I
AT3G56720	538.206	-1.19831	0.25699	-4.66287	3.1183e-06	3.84319e-05	381	302	704	769	344.619	308.638	763.864	735.701	100	UP_AtMSCtrl_DOWN_AtC32I
AT3G25480	437.952	1.40177	0.300703	4.66166	3.13676e-06	3.86315e-05	834	505	247	223	754.362	516.099	268.004	213.344	100	DOWN_AtMSCtrl_UP_AtC32I
AT5G65540	468.63	-1.29558	0.278096	-4.65874	3.18154e-06	3.91546e-05	343	227	638	669	310.247	231.989	692.252	640.032	100	UP_AtMSCtrl_DOWN_AtC32I
AT2G43460	1356.73	1.0746	0.230724	4.65751	3.20064e-06	3.93612e-05	1864	1951	806	912	1686.01	1993.88	874.538	872.509	100	DOWN_AtMSCtrl_UP_AtC32I
AT3G10520	1002.39	1.22521	0.263186	4.65531	3.23491e-06	3.97538e-05	1261	1632	570	609	1140.59	1667.87	618.47	582.63	100	DOWN_AtMSCtrl_UP_AtC32I
AT1G13960	1462.04	-1.08763	0.233701	-4.65393	3.25661e-06	3.99916e-05	965	977	1989	1901	872.853	998.473	2158.13	1818.68	100	UP_AtMSCtrl_DOWN_AtC32I
AT1G52618	161.161	1.663	0.357394	4.65314	3.26915e-06	4.01166e-05	293	220	73	79	265.022	224.835	79.2075	75.5792	100	DOWN_AtMSCtrl_UP_AtC32I
AT1G70900	1401.71	1.09189	0.234699	4.6523	3.28249e-06	4.02514e-05	1995	1969	746	1025	1804.5	2012.28	809.436	980.616	100	DOWN_AtMSCtrl_UP_AtC32I
AT4G13780	1575.91	-1.23109	0.264752	-4.64998	3.31959e-06	4.0677e-05	1270	718	2156	2176	1148.73	733.781	2339.33	2081.78	100	UP_AtMSCtrl_DOWN_AtC32I
AT1G76780	29.1217	-4.86989	1.04748	-4.64914	3.33325e-06	4.07563e-05	2	2	80	27	1.80902	2.04396	86.8028	25.8309	100	UP_AtMSCtrl_DOWN_AtC32I
AT3G06670	1542.35	-1.08779	0.233968	-4.64933	3.33019e-06	4.07563e-05	1217	854	1929	2198	1100.79	872.77	2093.03	2102.82	100	UP_AtMSCtrl_DOWN_AtC32I
AT5G28740	537.042	-1.18323	0.254502	-4.64918	3.33262e-06	4.07563e-05	369	316	693	773	333.765	322.945	751.929	739.528	100	UP_AtMSCtrl_DOWN_AtC32I
AT1G07010	633.559	1.19736	0.25756	4.64885	3.33798e-06	4.07744e-05	871	956	352	405	787.829	977.012	381.932	387.463	100	DOWN_AtMSCtrl_UP_AtC32I
AT3G46600	3670.36	-1.05463	0.226863	-4.64875	3.33953e-06	4.07744e-05	2862	2135	5005	4683	2588.71	2181.92	5430.6	4480.22	100	UP_AtMSCtrl_DOWN_AtC32I
AT5G52230	162.717	-1.9278	0.414859	-4.64687	3.37005e-06	4.11176e-05	94	49	299	200	85.024	50.077	324.425	191.34	100	UP_AtMSCtrl_DOWN_AtC32I
AT5G08450	1662.55	-1.04044	0.22394	-4.64605	3.38355e-06	4.12527e-05	1123	1135	2080	2318	1015.77	1159.95	2256.87	2217.63	100	UP_AtMSCtrl_DOWN_AtC32I
AT3G02690	1628.71	1.04303	0.224519	4.6456	3.3909e-06	4.13126e-05	2532	2051	931	1169	2290.22	2096.08	1010.17	1118.38	100	DOWN_AtMSCtrl_UP_AtC32I
AT1G10360	897.821	1.22089	0.26291	4.64378	3.42093e-06	4.16487e-05	1162	1431	459	606	1051.04	1462.45	498.031	579.759	100	DOWN_AtMSCtrl_UP_AtC32I
AT4G26140	95.3409	-2.13028	0.459063	-4.64051	3.47549e-06	4.22826e-05	41	33	176	125	37.0849	33.7253	190.966	119.587	100	UP_AtMSCtrl_DOWN_AtC32I
AT3G60210	867.356	1.12764	0.243037	4.63976	3.48816e-06	4.24064e-05	1395	1094	536	531	1261.79	1118.04	581.579	508.007	100	DOWN_AtMSCtrl_UP_AtC32I
AT4G08350	895.642	-1.11796	0.240981	-4.63921	3.4974e-06	4.24582e-05	674	509	1094	1323	609.64	520.187	1187.03	1265.71	100	UP_AtMSCtrl_DOWN_AtC32I
AT4G28230	74.8687	-2.43086	0.523981	-4.63921	3.49741e-06	4.24582e-05	17	31	133	113	15.3767	31.6813	144.31	108.107	100	UP_AtMSCtrl_DOWN_AtC32I
AT2G33530	229.29	1.47597	0.318247	4.6378	3.5214e-06	4.27189e-05	399	307	108	131	360.9	313.747	117.184	125.328	100	DOWN_AtMSCtrl_UP_AtC32I
AT4G26670	1480.54	1.14823	0.247771	4.63424	3.58259e-06	4.34303e-05	2582	1708	779	1041	2335.45	1745.54	845.242	995.923	100	DOWN_AtMSCtrl_UP_AtC32I
AT5G07940	545.731	-1.17899	0.254445	-4.63358	3.594e-06	4.35376e-05	380	318	684	807	343.714	324.989	742.164	772.056	100	UP_AtMSCtrl_DOWN_AtC32I
AT5G49360	21372.9	-1.3241	0.285834	-4.63242	3.61421e-06	4.37513e-05	9355	15596	31118	28564	8461.7	15938.8	33764.1	27327.1	100	UP_AtMSCtrl_DOWN_AtC32I
AT4G16980	8708.26	1.15126	0.248607	4.63082	3.64214e-06	4.4058e-05	16000	9341	5308	5284	14472.2	9546.3	5759.36	5055.2	100	DOWN_AtMSCtrl_UP_AtC32I
AT1G12110	1795.24	1.02279	0.220929	4.62952	3.66521e-06	4.42741e-05	2734	2289	1140	1183	2472.93	2339.31	1236.94	1131.77	100	DOWN_AtMSCtrl_UP_AtC32I
AT3G25600	297.834	1.47271	0.318111	4.62955	3.66461e-06	4.42741e-05	391	511	147	163	353.664	522.231	159.5	155.942	100	DOWN_AtMSCtrl_UP_AtC32I
AT2G19750	517.794	1.20625	0.260743	4.6262	3.72434e-06	4.49564e-05	838	672	304	310	757.98	686.77	329.851	296.577	100	DOWN_AtMSCtrl_UP_AtC32I
AT4G16870	753.363	-1.57656	0.340811	-4.62589	3.72991e-06	4.49917e-05	585	222	1078	1137	529.139	226.879	1169.67	1087.77	100	UP_AtMSCtrl_DOWN_AtC32I
AT1G65580	874.546	-1.09592	0.23697	-4.62471	3.75125e-06	4.51921e-05	645	520	1090	1255	583.41	531.429	1182.69	1200.66	100	UP_AtMSCtrl_DOWN_AtC32I
AT2G41990	315.862	-1.35227	0.292404	-4.62468	3.75184e-06	4.51921e-05	211	161	441	449	190.852	164.539	478.5	429.558	100	UP_AtMSCtrl_DOWN_AtC32I
AT4G29590	501.359	1.28093	0.277103	4.62257	3.79008e-06	4.56204e-05	743	733	229	351	672.052	749.11	248.473	335.801	100	DOWN_AtMSCtrl_UP_AtC32I
AT4G13220	248.117	1.43488	0.310424	4.62231	3.79489e-06	4.5646e-05	427	331	120	144	386.226	338.275	130.204	137.765	100	DOWN_AtMSCtrl_UP_AtC32I
AT2G32640	274.738	1.41667	0.306648	4.61984	3.8403e-06	4.61379e-05	475	362	126	170	429.643	369.956	136.714	162.639	100	DOWN_AtMSCtrl_UP_AtC32I
AT2G38740	218.051	1.49044	0.322631	4.61965	3.84392e-06	4.61379e-05	343	326	98	128	310.247	333.165	106.333	122.457	100	DOWN_AtMSCtrl_UP_AtC32I
AT3G25040	698.062	1.15693	0.250429	4.61979	3.84131e-06	4.61379e-05	1105	908	432	414	999.485	927.957	468.735	396.073	100	DOWN_AtMSCtrl_UP_AtC32I
AT2G44900	743.365	-1.20231	0.2603	-4.61893	3.85726e-06	4.62653e-05	574	373	946	1094	519.189	381.198	1026.44	1046.63	100	UP_AtMSCtrl_DOWN_AtC32I
AT1G31300	467.304	1.3428	0.290748	4.61841	3.86685e-06	4.63477e-05	746	652	194	332	674.765	666.33	210.497	317.624	100	DOWN_AtMSCtrl_UP_AtC32I
AT1G29350	1744.02	-1.23336	0.267167	-4.61644	3.90371e-06	4.67566e-05	1398	799	2494	2288	1264.51	816.561	2706.08	2188.93	100	UP_AtMSCtrl_DOWN_AtC32I
AT3G59840	301.893	1.35594	0.293953	4.61278	3.97319e-06	4.75552e-05	489	417	145	190	442.306	426.165	157.33	181.773	100	DOWN_AtMSCtrl_UP_AtC32I
AT3G63140	7937.87	1.0726	0.232604	4.61129	4.00179e-06	4.78639e-05	9960	12242	4641	5431	9008.93	12511.1	5035.65	5195.83	100	DOWN_AtMSCtrl_UP_AtC32I
AT5G42825	2138.66	1.05478	0.228783	4.6104	4.01891e-06	4.80348e-05	3219	2802	1135	1618	2911.62	2863.58	1231.51	1547.94	100	DOWN_AtMSCtrl_UP_AtC32I
AT4G04850	675.38	1.19933	0.260153	4.61008	4.02505e-06	4.80408e-05	1152	822	347	463	1042	840.067	376.507	442.952	100	DOWN_AtMSCtrl_UP_AtC32I
AT5G48610	238.787	-1.6279	0.353108	-4.61021	4.02263e-06	4.80408e-05	108	133	404	296	97.6872	135.923	438.354	283.183	100	UP_AtMSCtrl_DOWN_AtC32I
AT3G14205	853.671	-1.24944	0.271101	-4.60876	4.05085e-06	4.83148e-05	672	394	1163	1194	607.831	402.66	1261.9	1142.3	100	UP_AtMSCtrl_DOWN_AtC32I
AT4G12020	337.383	-1.46864	0.318763	-4.6073	4.07933e-06	4.86204e-05	242	136	414	567	218.892	138.989	449.204	542.448	100	UP_AtMSCtrl_DOWN_AtC32I
AT3G12780	32118.1	0.983482	0.213478	4.60694	4.08629e-06	4.86693e-05	43868	44660	21327	20917	39679.1	45641.6	23140.5	20011.3	100	DOWN_AtMSCtrl_UP_AtC32I
AT3G16857	2864.54	-1.17383	0.254808	-4.60674	4.09035e-06	4.86835e-05	1560	2063	3989	3774	1411.04	2108.34	4328.2	3610.58	100	UP_AtMSCtrl_DOWN_AtC32I
AT1G20810	781.772	1.14444	0.248514	4.60511	4.12247e-06	4.90314e-05	1130	1107	408	555	1022.1	1131.33	442.694	530.968	100	DOWN_AtMSCtrl_UP_AtC32I
AT2G16660	613.683	1.16418	0.252964	4.60215	4.18157e-06	4.96649e-05	969	803	372	370	876.471	820.649	403.633	353.979	100	DOWN_AtMSCtrl_UP_AtC32I
AT3G22220	336.621	-1.32101	0.287042	-4.60216	4.1814e-06	4.96649e-05	221	181	411	539	199.897	184.978	445.949	515.661	100	UP_AtMSCtrl_DOWN_AtC32I
AT2G36870	276.274	1.37381	0.298605	4.60075	4.20969e-06	4.9964e-05	451	381	147	155	407.934	389.374	159.5	148.288	100	DOWN_AtMSCtrl_UP_AtC32I
AT5G52530	1120.82	-1.13173	0.246047	-4.59966	4.23183e-06	5.01917e-05	885	591	1440	1585	800.492	603.989	1562.45	1516.37	99.99	UP_AtMSCtrl_DOWN_AtC32I
AT3G17510	1578.69	-1.10165	0.23958	-4.59828	4.25996e-06	5.04902e-05	953	1121	1991	2244	861.999	1145.64	2160.3	2146.83	99.99	UP_AtMSCtrl_DOWN_AtC32I
AT3G55360	787.092	1.12091	0.24391	4.5956	4.31514e-06	5.1073e-05	1252	1002	483	489	1132.45	1024.02	524.072	467.826	99.99	DOWN_AtMSCtrl_UP_AtC32I
AT4G00800	1003.2	-1.40172	0.305006	-4.5957	4.31302e-06	5.1073e-05	805	365	1345	1518	728.131	373.022	1459.37	1452.27	99.99	UP_AtMSCtrl_DOWN_AtC32I
AT5G46730	69.347	2.49815	0.543655	4.5951	4.32551e-06	5.11601e-05	90	151	19	22	81.406	154.319	20.6157	21.0474	99.99	DOWN_AtMSCtrl_UP_AtC32I
AT5G45060	486.361	-1.42025	0.309167	-4.59379	4.35259e-06	5.14446e-05	371	189	625	772	335.574	193.154	678.147	738.572	99.99	UP_AtMSCtrl_DOWN_AtC32I
AT1G02620	167.035	-1.64915	0.359014	-4.59357	4.35732e-06	5.14648e-05	76	91	226	273	68.7428	93.0001	245.218	261.179	99.99	UP_AtMSCtrl_DOWN_AtC32I
AT4G15233	356.526	-1.74801	0.380899	-4.58918	4.45001e-06	5.24867e-05	255	94	426	666	230.65	96.066	462.225	637.161	99.99	UP_AtMSCtrl_DOWN_AtC32I
AT5G57030	979.131	1.08057	0.235459	4.5892	4.4494e-06	5.24867e-05	1504	1271	545	696	1360.38	1298.94	591.344	665.862	99.99	DOWN_AtMSCtrl_UP_AtC32I
AT4G29670	2333.37	1.19858	0.261252	4.58782	4.47889e-06	5.27906e-05	4411	2457	1274	1516	3989.8	2511	1382.33	1450.36	99.99	DOWN_AtMSCtrl_UP_AtC32I
AT1G45145	327.05	1.35122	0.294533	4.58766	4.48241e-06	5.27956e-05	463	510	163	200	418.789	521.209	176.861	191.34	99.99	DOWN_AtMSCtrl_UP_AtC32I
AT2G39300	65.8641	-2.70707	0.590251	-4.5863	4.51171e-06	5.31039e-05	26	11	142	78	23.5173	11.2418	154.075	74.6225	99.99	UP_AtMSCtrl_DOWN_AtC32I
AT3G60370	375.526	1.29182	0.281684	4.58607	4.51671e-06	5.31179e-05	550	557	187	243	497.481	569.242	202.901	232.478	99.99	DOWN_AtMSCtrl_UP_AtC32I
AT4G22580	172.575	1.5871	0.346079	4.58596	4.51915e-06	5.31179e-05	281	258	84	85	254.168	263.671	91.1429	81.3194	99.99	DOWN_AtMSCtrl_UP_AtC32I
AT4G24270	277.824	-1.37839	0.30059	-4.58564	4.52604e-06	5.31622e-05	183	140	358	433	165.526	143.077	388.442	414.251	99.99	UP_AtMSCtrl_DOWN_AtC32I
AT1G64150	339.207	1.60979	0.351109	4.58487	4.54272e-06	5.32478e-05	552	512	100	236	499.29	523.253	108.503	225.781	99.99	DOWN_AtMSCtrl_UP_AtC32I
AT4G09160	486.693	-1.2552	0.273758	-4.58507	4.53824e-06	5.32478e-05	301	296	709	630	272.258	302.506	769.29	602.72	99.99	UP_AtMSCtrl_DOWN_AtC32I
AT4G12830	485.689	1.2557	0.273879	4.58487	4.54259e-06	5.32478e-05	855	583	265	299	773.357	595.814	287.534	286.053	99.99	DOWN_AtMSCtrl_UP_AtC32I
AT5G05540	337.536	-1.37319	0.299553	-4.58414	4.55862e-06	5.33974e-05	237	158	413	550	214.369	161.473	448.119	526.184	99.99	UP_AtMSCtrl_DOWN_AtC32I
AT5G59500	295.338	1.40655	0.306844	4.58391	4.56357e-06	5.34186e-05	513	385	168	148	464.014	393.462	182.286	141.591	99.99	DOWN_AtMSCtrl_UP_AtC32I
AT5G26610	343.494	-1.33219	0.290775	-4.5815	4.61647e-06	5.40007e-05	215	192	401	573	194.47	196.22	435.099	548.188	99.99	UP_AtMSCtrl_DOWN_AtC32I
AT3G17750	703.378	-1.39935	0.305471	-4.58095	4.62876e-06	5.41072e-05	555	265	962	1042	502.004	270.824	1043.8	996.88	99.99	UP_AtMSCtrl_DOWN_AtC32I
AT5G14910	3379.3	0.996898	0.217645	4.58039	4.641e-06	5.4213e-05	4661	4686	2188	2235	4215.93	4788.99	2374.06	2138.22	99.99	DOWN_AtMSCtrl_UP_AtC32I
AT3G55020	807.098	-1.13843	0.248605	-4.57929	4.66561e-06	5.4463e-05	613	444	974	1216	554.465	453.759	1056.82	1163.35	99.99	UP_AtMSCtrl_DOWN_AtC32I
AT1G12910	1114.32	-1.05464	0.230455	-4.57633	4.73199e-06	5.52e-05	780	727	1446	1505	705.519	742.979	1568.96	1439.83	99.99	UP_AtMSCtrl_DOWN_AtC32I
AT5G53020	236.323	-1.66935	0.364793	-4.57616	4.73593e-06	5.52081e-05	149	89	411	286	134.772	90.9561	445.949	273.616	99.99	UP_AtMSCtrl_DOWN_AtC32I
AT3G19860	2261.23	-0.998444	0.218217	-4.57546	4.75185e-06	5.53558e-05	1607	1530	2904	3007	1453.55	1563.63	3150.94	2876.79	99.99	UP_AtMSCtrl_DOWN_AtC32I
AT1G22690	219.627	1.4582	0.3189	4.5726	4.81704e-06	5.60768e-05	354	317	104	127	320.197	323.967	112.844	121.501	99.99	DOWN_AtMSCtrl_UP_AtC32I
AT5G63500	396.988	1.25371	0.274237	4.57164	4.83932e-06	5.62977e-05	639	529	228	232	577.982	540.627	247.388	221.954	99.99	DOWN_AtMSCtrl_UP_AtC32I
AT2G42170	279.041	-1.38702	0.303523	-4.56974	4.88338e-06	5.67714e-05	154	166	356	440	139.295	169.648	386.272	420.947	99.99	UP_AtMSCtrl_DOWN_AtC32I
AT3G06500	1462.25	-1.05164	0.230174	-4.56888	4.90327e-06	5.69636e-05	1056	928	1655	2247	955.164	948.396	1795.73	2149.7	99.99	UP_AtMSCtrl_DOWN_AtC32I
AT4G27280	495.144	1.35973	0.297973	4.56325	5.03667e-06	5.84735e-05	676	796	304	236	611.449	813.495	329.851	225.781	99.99	DOWN_AtMSCtrl_UP_AtC32I
AT5G04320	100.589	-2.042	0.447603	-4.56208	5.06497e-06	5.8762e-05	55	28	154	164	49.7481	28.6154	167.095	156.899	99.99	UP_AtMSCtrl_DOWN_AtC32I
AT3G48430	277.008	-1.4465	0.317244	-4.55957	5.12595e-06	5.94288e-05	194	119	385	411	175.475	121.615	417.738	393.203	99.99	UP_AtMSCtrl_DOWN_AtC32I
AT5G60160	720.953	-1.13133	0.248157	-4.55892	5.14179e-06	5.95719e-05	491	450	838	1119	444.115	459.89	909.259	1070.55	99.99	UP_AtMSCtrl_DOWN_AtC32I
AT4G37440	936.978	-1.10049	0.241516	-4.55658	5.1994e-06	6.01983e-05	713	535	1237	1269	644.916	546.759	1342.19	1214.05	99.99	UP_AtMSCtrl_DOWN_AtC32I
AT5G06790	82.6384	2.10707	0.46255	4.55534	5.23006e-06	6.05122e-05	144	135	31	30	130.25	137.967	33.6361	28.701	99.99	DOWN_AtMSCtrl_UP_AtC32I
AT3G06430	1235.95	-1.28526	0.282189	-4.5546	5.24863e-06	6.06858e-05	994	527	1773	1654	899.084	538.583	1923.77	1582.38	99.99	UP_AtMSCtrl_DOWN_AtC32I
AT4G04720	603.539	-1.20234	0.264275	-4.54957	5.37565e-06	6.21122e-05	459	309	793	860	415.171	315.791	860.432	822.761	99.99	UP_AtMSCtrl_DOWN_AtC32I
AT2G47000	144.265	-1.75212	0.385173	-4.54892	5.39207e-06	6.22596e-05	87	52	219	217	78.6925	53.1429	237.623	207.604	99.99	UP_AtMSCtrl_DOWN_AtC32I
AT1G55260	378.132	1.24705	0.274167	4.54853	5.40226e-06	6.23349e-05	589	520	206	235	532.757	531.429	223.517	224.824	99.99	DOWN_AtMSCtrl_UP_AtC32I
AT1G17130	632.28	-1.14	0.250649	-4.54821	5.41032e-06	6.23856e-05	450	374	847	858	407.03	382.22	919.024	820.848	99.99	UP_AtMSCtrl_DOWN_AtC32I
AT1G16710	452.709	-1.26022	0.277166	-4.5468	5.44666e-06	6.2762e-05	334	226	571	688	302.107	230.967	619.555	658.209	99.99	UP_AtMSCtrl_DOWN_AtC32I
AT1G75900	94.7357	2.00656	0.441373	4.54618	5.46289e-06	6.288e-05	149	165	37	37	134.772	168.626	40.1463	35.3979	99.99	DOWN_AtMSCtrl_UP_AtC32I
AT2G16640	1712.33	-1.18663	0.26102	-4.54612	5.46429e-06	6.288e-05	1408	799	2144	2543	1273.55	816.561	2326.31	2432.89	99.99	UP_AtMSCtrl_DOWN_AtC32I
AT1G27752	838.569	-1.07514	0.236556	-4.54498	5.49414e-06	6.3138e-05	588	536	1063	1172	531.852	547.781	1153.39	1121.25	99.99	UP_AtMSCtrl_DOWN_AtC32I
AT3G53890	764.785	1.2251	0.269548	4.545	5.49345e-06	6.3138e-05	1001	1211	377	530	905.415	1237.62	409.058	507.05	99.99	DOWN_AtMSCtrl_UP_AtC32I
AT1G32070	1198.75	1.05584	0.232367	4.54386	5.52324e-06	6.33206e-05	1660	1699	698	836	1501.49	1736.34	757.354	799.8	99.99	DOWN_AtMSCtrl_UP_AtC32I
AT3G01370	1183.1	-1.03186	0.227081	-4.54401	5.51932e-06	6.33206e-05	880	742	1446	1682	795.97	758.308	1568.96	1609.17	99.99	UP_AtMSCtrl_DOWN_AtC32I
AT4G00430	2710.55	0.995348	0.219063	4.54366	5.52864e-06	6.33206e-05	3864	3645	1789	1757	3495.03	3725.11	1941.13	1680.92	99.99	DOWN_AtMSCtrl_UP_AtC32I
AT5G38210	376.914	-1.3562	0.298479	-4.54368	5.52796e-06	6.33206e-05	278	168	489	579	251.454	171.692	530.582	553.929	99.99	UP_AtMSCtrl_DOWN_AtC32I
AT5G66190	18274.7	1.0114	0.222585	4.5439	5.5223e-06	6.33206e-05	23517	26996	11599	12180	21271.4	27589.3	12585.3	11652.6	99.99	DOWN_AtMSCtrl_UP_AtC32I
AT3G08020	370.767	-1.43606	0.316102	-4.54301	5.54567e-06	6.34729e-05	277	146	502	563	250.55	149.209	544.687	538.621	99.99	UP_AtMSCtrl_DOWN_AtC32I
AT2G27200	164.728	-1.61832	0.356252	-4.54263	5.55564e-06	6.35442e-05	92	77	205	287	83.215	78.6924	222.432	274.573	99.99	UP_AtMSCtrl_DOWN_AtC32I
AT3G55250	1354.99	1.11521	0.245521	4.54223	5.56623e-06	6.36227e-05	1744	2085	806	875	1577.47	2130.83	874.538	837.111	99.99	DOWN_AtMSCtrl_UP_AtC32I
AT3G43300	1401.08	-1.16927	0.257497	-4.54091	5.60111e-06	6.39783e-05	1137	681	1875	1929	1028.43	695.968	2034.44	1845.47	99.99	UP_AtMSCtrl_DOWN_AtC32I
AT2G32710	942.435	-1.07405	0.23658	-4.53989	5.62837e-06	6.42159e-05	699	569	1235	1271	632.253	581.506	1340.02	1215.96	99.99	UP_AtMSCtrl_DOWN_AtC32I
AT3G61860	812.613	-1.17675	0.259204	-4.53985	5.62946e-06	6.42159e-05	471	559	970	1255	426.025	571.286	1052.48	1200.66	99.99	UP_AtMSCtrl_DOWN_AtC32I
AT1G67560	694.172	-1.11062	0.244708	-4.53854	5.66453e-06	6.45727e-05	506	412	886	979	457.683	421.055	961.341	936.608	99.99	UP_AtMSCtrl_DOWN_AtC32I
AT2G41100	9000.85	-0.940965	0.207342	-4.53822	5.67311e-06	6.46271e-05	6922	5939	11445	11764	6261.02	6069.53	12418.2	11254.6	99.99	UP_AtMSCtrl_DOWN_AtC32I
AT4G29780	1091.32	1.32627	0.292395	4.53588	5.73645e-06	6.53049e-05	1256	1942	625	592	1136.07	1984.68	678.147	566.366	99.99	DOWN_AtMSCtrl_UP_AtC32I
AT4G20400	749.993	-1.42927	0.315291	-4.53319	5.81008e-06	6.60989e-05	598	265	1016	1135	540.898	270.824	1102.4	1085.85	99.99	UP_AtMSCtrl_DOWN_AtC32I
AT3G46630	1143.45	1.0506	0.231767	4.53301	5.81485e-06	6.61089e-05	1780	1443	652	817	1610.03	1474.72	707.443	781.623	99.99	DOWN_AtMSCtrl_UP_AtC32I
AT2G31960	1557.88	-1.16033	0.256066	-4.53135	5.86092e-06	6.65881e-05	1276	755	1943	2297	1154.16	771.594	2108.22	2197.54	99.99	UP_AtMSCtrl_DOWN_AtC32I
AT4G15810	96.198	-1.98771	0.438802	-4.52985	5.90248e-06	6.70156e-05	46	35	159	141	41.6075	35.7693	172.521	134.895	99.99	UP_AtMSCtrl_DOWN_AtC32I
AT1G79850	7985.04	0.973513	0.21493	4.52944	5.91407e-06	6.70577e-05	10862	11094	5273	5285	9824.8	11337.8	5721.39	5056.15	99.99	DOWN_AtMSCtrl_UP_AtC32I
AT5G02890	151.419	1.80189	0.39781	4.52954	5.91133e-06	6.70577e-05	316	181	52	82	285.825	184.978	56.4218	78.4493	99.99	DOWN_AtMSCtrl_UP_AtC32I
AT5G23920	1171.29	1.14191	0.252128	4.52908	5.92406e-06	6.71262e-05	2074	1319	666	772	1875.96	1347.99	722.633	738.572	99.99	DOWN_AtMSCtrl_UP_AtC32I
AT3G10860	1117.88	1.13737	0.251134	4.52894	5.92815e-06	6.71278e-05	1434	1739	637	738	1297.07	1777.22	691.167	706.044	99.99	DOWN_AtMSCtrl_UP_AtC32I
AT5G07010	156.371	1.75822	0.388351	4.52741	5.97117e-06	6.75251e-05	205	291	68	72	185.425	297.396	73.7824	68.8823	99.99	DOWN_AtMSCtrl_UP_AtC32I
AT5G25250	536.317	-1.21508	0.268381	-4.52745	5.96984e-06	6.75251e-05	349	323	778	685	315.674	330.099	844.157	655.339	99.99	UP_AtMSCtrl_DOWN_AtC32I
AT1G78995	1028.28	1.23476	0.272849	4.52543	6.02715e-06	6.81128e-05	1293	1680	635	562	1169.53	1716.92	688.997	537.665	99.99	DOWN_AtMSCtrl_UP_AtC32I
AT1G64570	363.415	-1.5225	0.336592	-4.52328	6.08884e-06	6.87643e-05	271	127	459	607	245.122	129.791	498.031	580.716	99.99	UP_AtMSCtrl_DOWN_AtC32I
AT1G53430	917.632	-1.47458	0.326055	-4.5225	6.11129e-06	6.89609e-05	732	302	1133	1537	662.102	308.638	1229.34	1470.45	99.99	UP_AtMSCtrl_DOWN_AtC32I
AT4G18120	2356.86	-1.36422	0.301659	-4.5224	6.11436e-06	6.89609e-05	1938	865	2809	3912	1752.94	884.012	3047.86	3742.61	99.99	UP_AtMSCtrl_DOWN_AtC32I
AT1G14380	335.276	-1.29914	0.287337	-4.52132	6.14539e-06	6.9265e-05	206	197	407	535	186.329	201.33	441.609	511.834	99.99	UP_AtMSCtrl_DOWN_AtC32I
AT5G64850	188.181	1.53568	0.339704	4.52063	6.16558e-06	6.94465e-05	291	290	96	93	263.213	296.374	104.163	88.973	99.99	DOWN_AtMSCtrl_UP_AtC32I
AT3G42170	921.787	-1.08219	0.23947	-4.51912	6.20983e-06	6.98526e-05	641	590	1243	1208	579.792	602.967	1348.7	1155.69	99.99	UP_AtMSCtrl_DOWN_AtC32I
AT3G46530	1039.7	-1.18091	0.261313	-4.51912	6.20985e-06	6.98526e-05	835	506	1387	1444	755.267	517.121	1504.94	1381.47	99.99	UP_AtMSCtrl_DOWN_AtC32I
AT5G64570	5987.47	-1.0513	0.232659	-4.51864	6.22375e-06	6.99626e-05	3822	4245	8295	7478	3457.04	4338.3	9000.36	7154.19	99.99	UP_AtMSCtrl_DOWN_AtC32I
AT5G62840	270.473	1.39397	0.308591	4.5172	6.26637e-06	7.03953e-05	480	342	132	162	434.165	349.517	143.225	154.985	99.99	DOWN_AtMSCtrl_UP_AtC32I
AT4G16310	295.329	-1.5143	0.335277	-4.51655	6.28548e-06	7.05633e-05	215	109	418	441	194.47	111.396	453.544	421.904	99.99	UP_AtMSCtrl_DOWN_AtC32I
AT3G19510	127.374	-1.79013	0.396457	-4.51532	6.32202e-06	7.08799e-05	63	56	210	175	56.9842	57.2308	227.857	167.422	99.99	UP_AtMSCtrl_DOWN_AtC32I
AT5G33320	1339.78	1.05249	0.233091	4.51534	6.3215e-06	7.08799e-05	2130	1653	746	976	1926.61	1689.33	809.436	933.738	99.99	DOWN_AtMSCtrl_UP_AtC32I
AT1G01140	1191.95	-1.15981	0.256875	-4.51507	6.32971e-06	7.09195e-05	966	587	1545	1691	873.758	599.902	1676.38	1617.78	99.99	UP_AtMSCtrl_DOWN_AtC32I
AT1G77350	144.514	1.66138	0.368161	4.51263	6.40283e-06	7.16456e-05	245	213	60	77	221.605	217.681	65.1021	73.6658	99.99	DOWN_AtMSCtrl_UP_AtC32I
AT2G15040	168.343	-2.00985	0.445397	-4.5125	6.40671e-06	7.16456e-05	107	36	203	334	96.7827	36.7912	220.262	319.537	99.99	UP_AtMSCtrl_DOWN_AtC32I
AT2G19710	291.446	-1.39285	0.308665	-4.51249	6.40716e-06	7.16456e-05	206	132	386	445	186.329	134.901	418.823	425.731	99.99	UP_AtMSCtrl_DOWN_AtC32I
AT1G34030	953.179	1.07558	0.238424	4.5112	6.44611e-06	7.20338e-05	1388	1302	523	689	1255.46	1330.62	567.473	659.165	99.99	DOWN_AtMSCtrl_UP_AtC32I
AT4G23130	144.784	1.91078	0.423798	4.50872	6.52209e-06	7.2835e-05	324	161	45	76	293.062	164.539	48.8266	72.7091	99.99	DOWN_AtMSCtrl_UP_AtC32I
AT4G14010	94.1642	2.04651	0.453947	4.50827	6.53599e-06	7.29423e-05	157	158	26	47	142.008	161.473	28.2109	44.9648	99.99	DOWN_AtMSCtrl_UP_AtC32I
AT1G18950	397.996	-1.22104	0.270899	-4.50735	6.56432e-06	7.32105e-05	264	234	503	594	238.791	239.143	545.772	568.279	99.99	UP_AtMSCtrl_DOWN_AtC32I
AT5G22580	1254.08	1.02746	0.228035	4.50572	6.61484e-06	7.37255e-05	1949	1568	743	883	1762.89	1602.46	806.181	844.765	99.99	DOWN_AtMSCtrl_UP_AtC32I
AT1G28230	172.884	1.66837	0.370311	4.50532	6.62716e-06	7.38145e-05	351	204	75	88	317.483	208.484	81.3776	84.1895	99.99	DOWN_AtMSCtrl_UP_AtC32I
AT5G14520	1110.5	-1.04582	0.232248	-4.50302	6.69934e-06	7.45696e-05	753	752	1415	1523	681.097	768.528	1535.32	1457.05	99.99	UP_AtMSCtrl_DOWN_AtC32I
AT2G14750	781.962	1.14689	0.254744	4.50214	6.7273e-06	7.48318e-05	1327	934	418	543	1200.29	954.528	453.544	519.487	99.99	DOWN_AtMSCtrl_UP_AtC32I
AT2G18160	1263.49	1.08888	0.242045	4.49866	6.83821e-06	7.59633e-05	1686	1872	693	903	1525.01	1913.14	751.929	863.899	99.99	DOWN_AtMSCtrl_UP_AtC32I
AT2G18162	1263.49	1.08888	0.242045	4.49866	6.83821e-06	7.59633e-05	1686	1872	693	903	1525.01	1913.14	751.929	863.899	99.99	DOWN_AtMSCtrl_UP_AtC32I
AT5G42520	2055.91	-1.06545	0.236844	-4.49853	6.84242e-06	7.59633e-05	1368	1391	2889	2540	1237.37	1421.57	3134.67	2430.02	99.99	UP_AtMSCtrl_DOWN_AtC32I
AT2G01670	1727.45	1.03031	0.229057	4.49805	6.85807e-06	7.60875e-05	2421	2396	1134	1088	2189.82	2448.66	1230.43	1040.89	99.99	DOWN_AtMSCtrl_UP_AtC32I
AT2G38270	714.298	1.10898	0.246567	4.49768	6.87e-06	7.61701e-05	1140	901	434	454	1031.14	920.803	470.905	434.341	99.99	DOWN_AtMSCtrl_UP_AtC32I
AT2G44980	236.62	-1.4689	0.326748	-4.4955	6.94052e-06	7.69018e-05	161	103	336	346	145.626	105.264	364.572	331.018	99.99	UP_AtMSCtrl_DOWN_AtC32I
AT2G35370	4525.25	1.27984	0.284934	4.4917	7.0658e-06	7.8239e-05	5006	8115	2189	3036	4527.98	8293.36	2375.14	2904.54	99.99	DOWN_AtMSCtrl_UP_AtC32I
AT4G18480	3941.06	1.00193	0.223085	4.49125	7.08059e-06	7.83518e-05	6328	4687	2595	2545	5723.75	4790.01	2815.66	2434.8	99.99	DOWN_AtMSCtrl_UP_AtC32I
AT5G26360	1529.62	-1.03328	0.230078	-4.49101	7.08852e-06	7.83885e-05	1203	900	1980	2051	1088.13	919.781	2148.37	1962.19	99.99	UP_AtMSCtrl_DOWN_AtC32I
AT5G35740	112.805	2.07269	0.461705	4.4892	7.14911e-06	7.90071e-05	217	165	24	63	196.279	168.626	26.0408	60.272	99.99	DOWN_AtMSCtrl_UP_AtC32I
AT1G10500	1314.83	1.07016	0.238395	4.489	7.15577e-06	7.90294e-05	1876	1826	694	986	1696.86	1866.13	753.014	943.305	99.99	DOWN_AtMSCtrl_UP_AtC32I
AT5G44005	297.22	1.44374	0.321632	4.48879	7.16298e-06	7.90577e-05	409	489	124	193	369.945	499.748	134.544	184.643	99.99	DOWN_AtMSCtrl_UP_AtC32I
AT2G16940	1994.08	-0.99867	0.222678	-4.48481	7.29774e-06	8.04929e-05	1388	1375	2320	2925	1255.46	1405.22	2517.28	2798.34	99.99	UP_AtMSCtrl_DOWN_AtC32I
AT5G67170	122.583	-1.76222	0.393112	-4.48275	7.36879e-06	8.12238e-05	58	58	162	212	52.4616	59.2748	175.776	202.82	99.99	UP_AtMSCtrl_DOWN_AtC32I
AT2G26340	1466.82	1.03417	0.230844	4.47995	7.46613e-06	8.22435e-05	2353	1775	843	1056	2128.31	1814.01	914.684	1010.27	99.99	DOWN_AtMSCtrl_UP_AtC32I
AT3G11630	11604.4	0.93261	0.20822	4.47896	7.50068e-06	8.25705e-05	15786	15833	7269	8436	14278.6	16181	7887.12	8070.71	99.99	DOWN_AtMSCtrl_UP_AtC32I
AT5G18980	297.158	-1.39886	0.312358	-4.47838	7.52121e-06	8.2743e-05	213	131	381	469	192.661	133.879	413.398	448.692	99.99	UP_AtMSCtrl_DOWN_AtC32I
AT5G59730	992.142	1.09529	0.244669	4.47664	7.58283e-06	8.3367e-05	1320	1477	592	651	1193.95	1509.46	642.341	622.811	99.99	DOWN_AtMSCtrl_UP_AtC32I
AT5G27640	1415.2	-1.01066	0.225806	-4.4758	7.6127e-06	8.36413e-05	1087	875	1801	1912	983.203	894.231	1954.15	1829.21	99.99	UP_AtMSCtrl_DOWN_AtC32I
AT3G01120	4176.31	1.02389	0.22879	4.47523	7.63303e-06	8.38106e-05	6931	4823	2358	3082	6269.17	4929	2558.51	2948.55	99.99	DOWN_AtMSCtrl_UP_AtC32I
AT2G45540	1249.69	-1.13502	0.253738	-4.4732	7.70559e-06	8.45527e-05	1019	628	1586	1792	921.697	641.803	1720.86	1714.4	99.99	UP_AtMSCtrl_DOWN_AtC32I
AT2G14880	873.487	1.07829	0.241095	4.47249	7.73153e-06	8.47826e-05	1208	1251	519	585	1092.65	1278.5	563.133	559.669	99.99	DOWN_AtMSCtrl_UP_AtC32I
AT2G25760	926.38	-1.16775	0.261132	-4.47188	7.75367e-06	8.49707e-05	745	457	1183	1339	673.861	467.044	1283.6	1281.02	99.99	UP_AtMSCtrl_DOWN_AtC32I
AT1G74340	358.858	1.25074	0.279701	4.4717	7.76007e-06	8.4986e-05	556	497	185	234	502.908	507.923	200.731	223.868	99.99	DOWN_AtMSCtrl_UP_AtC32I
AT3G47430	959.72	1.11488	0.24941	4.47005	7.81997e-06	8.55869e-05	1278	1439	523	674	1155.96	1470.63	567.473	644.815	99.99	DOWN_AtMSCtrl_UP_AtC32I
AT4G25740	1234.49	1.07852	0.241319	4.46927	7.84863e-06	8.58454e-05	1624	1842	711	852	1468.93	1882.48	771.46	815.107	99.99	DOWN_AtMSCtrl_UP_AtC32I
AT1G34370	2973.05	-1.08642	0.243148	-4.46815	7.88974e-06	8.62396e-05	1750	2177	3976	3941	1582.89	2224.85	4314.1	3770.35	99.99	UP_AtMSCtrl_DOWN_AtC32I
AT1G53233	845.15	1.34663	0.301525	4.46606	7.9675e-06	8.69777e-05	1698	871	498	433	1535.86	890.144	540.347	414.251	99.99	DOWN_AtMSCtrl_UP_AtC32I
AT1G78680	2743.26	0.952003	0.21316	4.46614	7.96427e-06	8.69777e-05	3940	3591	1771	1900	3563.77	3669.93	1921.6	1817.73	99.99	DOWN_AtMSCtrl_UP_AtC32I
AT3G01560	1415.34	-1.01065	0.226311	-4.46573	7.97954e-06	8.70533e-05	987	964	1809	1903	892.752	985.188	1962.83	1820.6	99.99	UP_AtMSCtrl_DOWN_AtC32I
AT3G50380	538.419	-1.53357	0.343486	-4.46473	8.01713e-06	8.73513e-05	422	167	714	864	381.704	170.67	774.715	826.588	99.99	UP_AtMSCtrl_DOWN_AtC32I
AT4G30600	2426.65	-1.05014	0.235202	-4.46484	8.01275e-06	8.73513e-05	1909	1403	3357	3035	1726.71	1433.84	3642.46	2903.58	99.99	UP_AtMSCtrl_DOWN_AtC32I
AT3G10490	732.61	-1.09992	0.24642	-4.46359	8.05962e-06	8.7758e-05	475	492	920	1045	429.643	502.814	998.232	999.75	99.99	UP_AtMSCtrl_DOWN_AtC32I
AT3G09390	13099.6	1.30683	0.29281	4.46308	8.07911e-06	8.78578e-05	13727	24364	6578	8305	12416.2	24899.5	7137.36	7945.38	99.99	DOWN_AtMSCtrl_UP_AtC32I
AT4G28730	221.29	1.43645	0.321851	4.46309	8.07862e-06	8.78578e-05	336	335	117	117	303.916	342.363	126.949	111.934	99.99	DOWN_AtMSCtrl_UP_AtC32I
AT1G55460	461.578	-1.17989	0.264581	-4.45947	8.21616e-06	8.90635e-05	321	269	619	637	290.348	274.912	671.636	609.417	99.99	UP_AtMSCtrl_DOWN_AtC32I
AT2G03270	265.019	-1.5917	0.356903	-4.45974	8.20576e-06	8.90635e-05	183	96	436	338	165.526	98.11	473.075	323.364	99.99	UP_AtMSCtrl_DOWN_AtC32I
AT2G32150	1465.35	-1.25282	0.280919	-4.45971	8.20702e-06	8.90635e-05	697	1079	1894	2167	630.444	1102.72	2055.06	2073.17	99.99	UP_AtMSCtrl_DOWN_AtC32I
AT3G11510	2149.7	1.09365	0.245221	4.45988	8.20056e-06	8.90635e-05	2685	3353	1317	1374	2428.61	3426.69	1428.99	1314.5	99.99	DOWN_AtMSCtrl_UP_AtC32I
AT5G20935	108.846	2.0527	0.460302	4.45947	8.21617e-06	8.90635e-05	147	213	49	33	132.963	217.681	53.1667	31.5711	99.99	DOWN_AtMSCtrl_UP_AtC32I
AT5G44870	545.073	-1.31334	0.294637	-4.45751	8.29188e-06	8.9827e-05	412	247	817	699	372.659	252.429	886.473	668.732	99.99	UP_AtMSCtrl_DOWN_AtC32I
AT3G23080	1292.71	-1.07101	0.240286	-4.45722	8.30296e-06	8.98897e-05	1033	717	1687	1749	934.36	732.759	1830.45	1673.27	99.99	UP_AtMSCtrl_DOWN_AtC32I
AT3G52730	1206.18	1.06317	0.238552	4.45678	8.32017e-06	8.99616e-05	1646	1736	771	758	1488.83	1774.16	836.562	725.178	99.99	DOWN_AtMSCtrl_UP_AtC32I
AT4G33200	499.708	-1.27094	0.285161	-4.4569	8.31517e-06	8.99616e-05	386	231	653	737	349.141	236.077	708.528	705.087	99.99	UP_AtMSCtrl_DOWN_AtC32I
AT3G06770	338.665	1.29909	0.291557	4.45571	8.36165e-06	9.026e-05	572	436	197	186	517.38	445.583	213.752	177.946	99.99	DOWN_AtMSCtrl_UP_AtC32I
AT3G52890	313.125	-1.31812	0.295832	-4.45564	8.3644e-06	9.026e-05	221	155	415	464	199.897	158.407	450.289	443.908	99.99	UP_AtMSCtrl_DOWN_AtC32I
AT4G35770	30658.6	-1.3284	0.298147	-4.45552	8.369e-06	9.026e-05	12478	23132	41636	44456	11286.5	23640.4	45176.5	42531	99.99	UP_AtMSCtrl_DOWN_AtC32I
AT4G38840	426.188	1.27451	0.286042	4.45568	8.36287e-06	9.026e-05	656	600	192	303	593.359	613.187	208.327	289.88	99.99	DOWN_AtMSCtrl_UP_AtC32I
AT2G42580	2887.34	-1.07441	0.241149	-4.45538	8.37466e-06	9.02637e-05	1723	2114	3838	3832	1558.47	2160.46	4164.36	3666.07	99.99	UP_AtMSCtrl_DOWN_AtC32I
AT3G12965	74.2487	2.19161	0.492161	4.45303	8.46673e-06	9.11983e-05	128	125	29	23	115.777	127.747	31.466	22.0041	99.99	DOWN_AtMSCtrl_UP_AtC32I
AT5G20170	162.211	-1.56441	0.351465	-4.45113	8.54201e-06	9.19509e-05	92	79	215	263	83.215	80.7363	233.282	251.612	99.99	UP_AtMSCtrl_DOWN_AtC32I
AT2G27820	535.851	1.17603	0.264255	4.45036	8.57247e-06	9.21622e-05	777	766	332	311	702.805	782.836	360.232	297.533	99.99	DOWN_AtMSCtrl_UP_AtC32I
AT5G35690	740.06	-1.16574	0.261939	-4.45043	8.57002e-06	9.21622e-05	576	383	876	1147	520.998	391.418	950.49	1097.33	99.99	UP_AtMSCtrl_DOWN_AtC32I
AT5G53930	132.802	-1.67802	0.377177	-4.4489	8.63095e-06	9.27323e-05	72	60	187	211	65.1248	61.3187	202.901	201.863	99.99	UP_AtMSCtrl_DOWN_AtC32I
AT2G35860	568.298	1.24678	0.280354	4.44716	8.70144e-06	9.33972e-05	1047	638	318	344	947.023	652.022	345.041	329.104	99.99	DOWN_AtMSCtrl_UP_AtC32I
AT4G39270	483.39	-1.33006	0.299097	-4.44692	8.71093e-06	9.33972e-05	374	207	599	767	338.287	211.55	649.936	733.788	99.99	UP_AtMSCtrl_DOWN_AtC32I
AT5G13970	191.93	-1.47226	0.331081	-4.44683	8.7148e-06	9.33972e-05	113	99	260	295	102.21	101.176	282.109	282.226	99.99	UP_AtMSCtrl_DOWN_AtC32I
AT5G37310	591.834	1.19054	0.267719	4.44697	8.70895e-06	9.33972e-05	1029	700	312	400	930.742	715.385	338.531	382.68	99.99	DOWN_AtMSCtrl_UP_AtC32I
AT5G02970	795.642	-1.20124	0.270206	-4.44565	8.76281e-06	9.38526e-05	632	384	1095	1077	571.651	392.44	1188.11	1030.36	99.99	UP_AtMSCtrl_DOWN_AtC32I
AT3G01550	34.9305	3.26912	0.735464	4.44498	8.7901e-06	9.40856e-05	79	54	5	8	71.4564	55.1869	5.42517	7.65359	99.99	DOWN_AtMSCtrl_UP_AtC32I
AT3G62140	121.388	-1.73649	0.390863	-4.44271	8.88335e-06	9.50239e-05	64	53	167	201	57.8887	54.1649	181.201	192.296	99.99	UP_AtMSCtrl_DOWN_AtC32I
AT1G77760	4112.39	-1.1166	0.251342	-4.44257	8.88918e-06	9.50266e-05	2327	3021	5717	5283	2104.8	3087.4	6203.14	5054.24	99.99	UP_AtMSCtrl_DOWN_AtC32I
AT4G20070	1009.76	-1.04542	0.23542	-4.44065	8.96879e-06	9.58173e-05	678	690	1273	1400	613.258	705.165	1381.25	1339.38	99.99	UP_AtMSCtrl_DOWN_AtC32I
AT4G00895	1933.24	1.02412	0.230695	4.43926	9.02681e-06	9.63767e-05	2651	2726	1279	1214	2397.86	2785.91	1387.76	1161.43	99.99	DOWN_AtMSCtrl_UP_AtC32I
AT1G22850	1759.46	1.02111	0.230033	4.43899	9.03836e-06	9.63789e-05	2482	2417	968	1330	2245	2470.12	1050.31	1272.41	99.99	DOWN_AtMSCtrl_UP_AtC32I
AT2G25610	537.061	1.24336	0.280091	4.43912	9.03294e-06	9.63789e-05	798	772	241	393	721.8	788.968	261.493	375.983	99.99	DOWN_AtMSCtrl_UP_AtC32I
AT1G60860	159.248	-1.75539	0.395559	-4.43776	9.09005e-06	9.67486e-05	103	51	201	286	93.1646	52.1209	218.092	273.616	99.99	UP_AtMSCtrl_DOWN_AtC32I
AT4G28780	309.599	1.30711	0.294537	4.43784	9.0867e-06	9.67486e-05	531	393	161	190	480.295	401.638	174.691	181.773	99.99	DOWN_AtMSCtrl_UP_AtC32I
AT4G32160	613.846	-1.15338	0.259901	-4.43776	9.09009e-06	9.67486e-05	471	328	774	893	426.025	335.209	839.817	854.332	99.99	UP_AtMSCtrl_DOWN_AtC32I
AT3G56400	1086.37	1.24909	0.281523	4.4369	9.1262e-06	9.70722e-05	2062	1168	514	762	1865.1	1193.67	557.708	729.005	99.99	DOWN_AtMSCtrl_UP_AtC32I
AT1G50010	3081.4	1.12485	0.25361	4.43537	9.19145e-06	9.77051e-05	5565	3343	1960	1828	5033.6	3416.48	2126.67	1748.85	99.99	DOWN_AtMSCtrl_UP_AtC32I
AT4G25130	2868.56	0.956807	0.215816	4.43344	9.27429e-06	9.85241e-05	4065	3812	1895	1929	3676.84	3895.78	2056.14	1845.47	99.99	DOWN_AtMSCtrl_UP_AtC32I
AT4G37040	890.641	1.09183	0.246425	4.43066	9.39448e-06	9.97387e-05	1239	1276	569	544	1120.69	1304.04	617.385	520.444	99.99	DOWN_AtMSCtrl_UP_AtC32I
AT1G09070	6570.91	1.04103	0.235055	4.42888	9.47239e-06	0.000100503	8297	9964	4264	4149	7504.73	10183	4626.59	3969.34	99.99	DOWN_AtMSCtrl_UP_AtC32I
AT1G60940	2324.68	-0.979859	0.221368	-4.42637	9.58326e-06	0.000101616	1871	1405	2831	3239	1692.34	1435.88	3071.73	3098.75	99.99	UP_AtMSCtrl_DOWN_AtC32I
AT5G52780	1116.87	1.03516	0.233915	4.42534	9.62884e-06	0.000102036	1674	1456	728	706	1514.15	1488	789.905	675.429	99.99	DOWN_AtMSCtrl_UP_AtC32I
AT4G35790	3874.55	-0.938346	0.212047	-4.42518	9.63626e-06	0.000102051	3081	2473	4592	5437	2786.8	2527.35	4982.48	5201.57	99.99	UP_AtMSCtrl_DOWN_AtC32I
AT1G34418	314.584	1.29685	0.293169	4.42357	9.70831e-06	0.00010275	488	443	184	172	441.401	452.737	199.646	164.552	99.99	DOWN_AtMSCtrl_UP_AtC32I
AT2G33730	976.988	-1.10446	0.249725	-4.42272	9.74674e-06	0.000103092	779	524	1279	1338	704.614	535.517	1387.76	1280.06	99.99	UP_AtMSCtrl_DOWN_AtC32I
AT4G13150	444.574	1.26366	0.285735	4.4225	9.75653e-06	0.000103132	742	572	203	316	671.147	584.572	220.262	302.317	99.99	DOWN_AtMSCtrl_UP_AtC32I
AT5G50460	457.854	1.19249	0.269652	4.42235	9.76319e-06	0.000103138	680	645	234	317	615.067	659.176	253.898	303.274	99.99	DOWN_AtMSCtrl_UP_AtC32I
AT2G17510	664.538	-1.25955	0.284831	-4.4221	9.77449e-06	0.000103193	532	295	845	1002	481.2	301.484	916.854	958.612	99.99	UP_AtMSCtrl_DOWN_AtC32I
AT1G73660	1265.66	-1.08737	0.245948	-4.42111	9.8193e-06	0.000103576	1028	675	1631	1749	929.837	689.836	1769.69	1673.27	99.99	UP_AtMSCtrl_DOWN_AtC32I
AT5G24870	259.323	-1.35343	0.306135	-4.42103	9.82296e-06	0.000103576	171	134	361	370	154.671	136.945	391.698	353.979	99.99	UP_AtMSCtrl_DOWN_AtC32I
AT1G27350	283.902	1.34714	0.304795	4.41982	9.87835e-06	0.000104046	431	416	165	148	389.844	425.143	179.031	141.591	99.99	DOWN_AtMSCtrl_UP_AtC32I
AT5G39830	814.564	1.12244	0.253959	4.41979	9.87967e-06	0.000104046	1314	1022	415	601	1188.53	1044.46	450.289	574.976	99.99	DOWN_AtMSCtrl_UP_AtC32I
AT5G52420	633.393	1.13945	0.257821	4.41953	9.89155e-06	0.000104106	936	877	324	459	846.622	896.275	351.551	439.125	99.99	DOWN_AtMSCtrl_UP_AtC32I
AT2G25210	219.278	1.55875	0.352814	4.41806	9.95916e-06	0.000104753	279	394	98	121	252.359	402.66	106.333	115.761	99.99	DOWN_AtMSCtrl_UP_AtC32I
AT5G11600	302.957	-1.33324	0.301874	-4.41655	1.00289e-05	0.000105422	164	192	399	454	148.34	196.22	432.929	434.341	99.99	UP_AtMSCtrl_DOWN_AtC32I
AT1G18740	589.912	1.14657	0.259705	4.41489	1.01062e-05	0.000106169	850	838	370	348	768.834	856.418	401.463	332.931	99.99	DOWN_AtMSCtrl_UP_AtC32I
AT3G47730	923.702	-1.03887	0.235336	-4.41442	1.01279e-05	0.000106265	701	563	1147	1297	634.062	575.374	1244.53	1240.84	99.99	UP_AtMSCtrl_DOWN_AtC32I
AT5G37770	648.412	1.77019	0.400999	4.41445	1.01268e-05	0.000106265	534	1490	287	289	483.009	1522.75	311.405	276.486	99.99	DOWN_AtMSCtrl_UP_AtC32I
AT5G22010	276.59	-1.31526	0.298036	-4.41309	1.01904e-05	0.000106854	180	151	350	428	162.812	154.319	379.762	409.467	99.99	UP_AtMSCtrl_DOWN_AtC32I
AT5G16750	284.633	-1.65881	0.375916	-4.41273	1.02077e-05	0.00010697	205	86	465	377	185.425	87.8902	504.541	360.675	99.99	UP_AtMSCtrl_DOWN_AtC32I
AT1G32230	3276.76	-1.18749	0.269133	-4.41228	1.02288e-05	0.000107126	2753	1476	3800	5211	2490.12	1508.44	4123.13	4985.36	99.99	UP_AtMSCtrl_DOWN_AtC32I
AT5G51410	617.114	-1.13081	0.256456	-4.40938	1.03668e-05	0.000108504	405	399	716	959	366.327	407.77	776.885	917.474	99.99	UP_AtMSCtrl_DOWN_AtC32I
AT2G04080	432.073	1.21162	0.274808	4.40898	1.03859e-05	0.000108637	623	630	220	295	563.51	643.847	238.708	282.226	99.99	DOWN_AtMSCtrl_UP_AtC32I
AT1G53520	297.76	1.40419	0.318525	4.40842	1.04126e-05	0.000108849	459	440	119	206	415.171	449.671	129.119	197.08	99.99	DOWN_AtMSCtrl_UP_AtC32I
AT4G12670	151.989	-1.7533	0.397833	-4.40712	1.04756e-05	0.000109441	97	50	189	276	87.7376	51.0989	205.072	264.049	99.99	UP_AtMSCtrl_DOWN_AtC32I
AT1G64850	549.542	1.15764	0.262757	4.40572	1.05434e-05	0.000110014	805	773	282	391	728.131	789.99	305.98	374.069	99.99	DOWN_AtMSCtrl_UP_AtC32I
AT4G01020	307.249	-1.45393	0.33001	-4.40572	1.05432e-05	0.000110014	225	122	459	421	203.515	124.681	498.031	402.77	99.99	UP_AtMSCtrl_DOWN_AtC32I
AT5G36700	2433.26	1.07438	0.243885	4.40525	1.05664e-05	0.000110186	4279	2670	1400	1688	3870.4	2728.68	1519.05	1614.91	99.99	DOWN_AtMSCtrl_UP_AtC32I
AT1G56190	5628.35	0.973731	0.22106	4.40483	1.05868e-05	0.000110331	7415	8034	3695	3749	6706.95	8210.58	4009.2	3586.66	99.99	DOWN_AtMSCtrl_UP_AtC32I
AT5G67240	323.741	-1.49653	0.339796	-4.40421	1.06172e-05	0.000110581	242	117	401	545	218.892	119.572	435.099	521.401	99.99	UP_AtMSCtrl_DOWN_AtC32I
AT5G02760	779.496	-1.09918	0.249593	-4.40387	1.06335e-05	0.000110682	532	500	1081	996	481.2	510.989	1172.92	952.872	99.99	UP_AtMSCtrl_DOWN_AtC32I
AT5G25560	2159.55	-1.12779	0.25621	-4.40182	1.07347e-05	0.000111667	1808	1053	2579	3270	1635.36	1076.14	2798.3	3128.41	99.99	UP_AtMSCtrl_DOWN_AtC32I
AT5G15020	989.527	-1.16961	0.265758	-4.40102	1.07744e-05	0.000112011	806	478	1324	1363	729.036	488.506	1436.59	1303.98	99.99	UP_AtMSCtrl_DOWN_AtC32I
AT1G16210	698.357	-1.47471	0.335391	-4.39698	1.0977e-05	0.000114048	254	499	989	1025	229.746	509.967	1073.1	980.616	99.99	UP_AtMSCtrl_DOWN_AtC32I
AT1G12650	315.457	-1.26443	0.287738	-4.39437	1.11097e-05	0.000115336	201	185	427	447	181.807	189.066	463.31	427.644	99.99	UP_AtMSCtrl_DOWN_AtC32I
AT1G75630	1959.04	1.10697	0.251913	4.39427	1.11145e-05	0.000115336	2411	3103	1078	1374	2180.78	3171.2	1169.67	1314.5	99.99	DOWN_AtMSCtrl_UP_AtC32I
AT3G51000	3349.54	-0.97161	0.22114	-4.39365	1.11464e-05	0.000115597	2255	2432	4172	4543	2039.67	2485.45	4526.76	4346.28	99.99	UP_AtMSCtrl_DOWN_AtC32I
AT1G11850	83.75	2.06258	0.469551	4.39266	1.11972e-05	0.000115982	154	128	36	27	139.295	130.813	39.0612	25.8309	99.99	DOWN_AtMSCtrl_UP_AtC32I
AT5G57660	4799.69	-0.949412	0.216132	-4.39274	1.11932e-05	0.000115982	3302	3487	5881	6551	2986.7	3563.64	6381.09	6267.33	99.99	UP_AtMSCtrl_DOWN_AtC32I
AT5G05740	836.332	1.03964	0.236752	4.39128	1.12684e-05	0.000116648	1269	1079	502	575	1147.82	1102.72	544.687	550.102	99.99	DOWN_AtMSCtrl_UP_AtC32I
AT4G25500	2594.94	-1.24676	0.283958	-4.39066	1.13009e-05	0.000116914	1195	1954	3447	3723	1080.89	1996.95	3740.11	3561.79	99.99	UP_AtMSCtrl_DOWN_AtC32I
AT3G18740	2014.73	1.07434	0.2447	4.39044	1.13119e-05	0.000116957	2696	2961	1034	1539	2438.56	3026.08	1121.93	1472.36	99.99	DOWN_AtMSCtrl_UP_AtC32I
AT5G36790	2432.18	1.0345	0.235665	4.38971	1.135e-05	0.000117278	4127	2744	1416	1730	3732.92	2804.31	1536.41	1655.09	99.99	DOWN_AtMSCtrl_UP_AtC32I
AT4G25520	643.254	-1.18281	0.269481	-4.38923	1.13752e-05	0.000117468	509	319	831	925	460.396	326.011	901.664	884.946	99.99	UP_AtMSCtrl_DOWN_AtC32I
AT1G72160	1504.89	-1.01811	0.232083	-4.38685	1.15005e-05	0.00011869	1080	991	2045	1893	976.872	1012.78	2218.9	1811.03	99.99	UP_AtMSCtrl_DOWN_AtC32I
AT3G04210	2803.72	0.948397	0.216286	4.38492	1.16028e-05	0.000119672	3889	3786	1836	1919	3517.64	3869.21	1992.12	1835.91	99.99	DOWN_AtMSCtrl_UP_AtC32I
AT1G31690	479.848	1.30593	0.297935	4.38327	1.16911e-05	0.000120511	922	521	261	282	833.959	532.451	283.194	269.789	99.99	DOWN_AtMSCtrl_UP_AtC32I
AT3G54400	224.841	1.49701	0.341609	4.38224	1.17465e-05	0.000121009	405	291	129	100	366.327	297.396	139.969	95.6699	99.99	DOWN_AtMSCtrl_UP_AtC32I
AT1G64650	743.77	1.19581	0.272913	4.38164	1.17788e-05	0.000121267	1335	845	372	523	1207.52	863.572	403.633	500.353	99.99	DOWN_AtMSCtrl_UP_AtC32I
AT1G80050	142.835	1.65169	0.377138	4.37954	1.18929e-05	0.000122368	269	186	61	75	243.313	190.088	66.1871	71.7524	99.99	DOWN_AtMSCtrl_UP_AtC32I
AT5G01810	1890.95	-1.06687	0.24362	-4.37923	1.19102e-05	0.000122472	1169	1357	2589	2415	1057.37	1386.83	2809.15	2310.43	99.99	UP_AtMSCtrl_DOWN_AtC32I
AT3G63200	209.047	1.43873	0.328604	4.37831	1.19604e-05	0.000122914	368	272	101	121	332.86	277.978	109.588	115.761	99.99	DOWN_AtMSCtrl_UP_AtC32I
AT2G02950	673.481	-1.13711	0.259871	-4.37566	1.21067e-05	0.000124343	526	358	888	929	475.773	365.868	963.511	888.773	99.99	UP_AtMSCtrl_DOWN_AtC32I
AT4G32020	6929.59	0.959391	0.219301	4.37477	1.21563e-05	0.000124776	9003	9943	4410	4838	8143.31	10161.5	4785	4628.51	99.99	DOWN_AtMSCtrl_UP_AtC32I
AT1G52420	552.933	-1.48462	0.339453	-4.37357	1.22228e-05	0.000125384	442	178	744	860	399.794	181.912	807.266	822.761	99.99	UP_AtMSCtrl_DOWN_AtC32I
AT5G14440	768.957	-1.29547	0.296407	-4.37058	1.23918e-05	0.00012704	369	545	1133	999	333.765	556.978	1229.34	955.742	99.99	UP_AtMSCtrl_DOWN_AtC32I
AT5G51820	2217.99	1.01246	0.231701	4.36967	1.24436e-05	0.000127494	3477	2727	1201	1711	3144.98	2786.94	1303.13	1636.91	99.99	DOWN_AtMSCtrl_UP_AtC32I
AT2G26930	417.802	1.21574	0.27841	4.36674	1.26116e-05	0.000129138	667	553	205	293	603.309	565.154	222.432	280.313	99.99	DOWN_AtMSCtrl_UP_AtC32I
AT1G31160	472.64	1.17677	0.269533	4.36595	1.2657e-05	0.000129451	663	696	252	320	599.691	711.297	273.429	306.144	99.99	DOWN_AtMSCtrl_UP_AtC32I
AT4G31920	257.078	-1.35765	0.310963	-4.36595	1.26574e-05	0.000129451	172	130	368	356	155.576	132.857	399.293	340.585	99.99	UP_AtMSCtrl_DOWN_AtC32I
AT5G21920	2327.5	0.952283	0.218207	4.36412	1.27634e-05	0.000130457	3340	3050	1375	1756	3021.07	3117.04	1491.92	1679.96	99.99	DOWN_AtMSCtrl_UP_AtC32I
AT2G02930	399.954	-1.5501	0.355237	-4.36356	1.27963e-05	0.000130714	139	276	544	629	125.727	282.066	590.259	601.764	99.99	UP_AtMSCtrl_DOWN_AtC32I
AT5G22060	649.472	-1.0813	0.247827	-4.36311	1.28227e-05	0.00013084	445	422	842	889	402.507	431.275	913.599	850.505	99.99	UP_AtMSCtrl_DOWN_AtC32I
AT5G55540	388.053	-1.4479	0.331853	-4.36309	1.2824e-05	0.00013084	270	168	654	446	244.218	171.692	709.613	426.688	99.99	UP_AtMSCtrl_DOWN_AtC32I
AT1G51090	150.034	1.61624	0.370462	4.36277	1.28424e-05	0.000130949	281	194	70	75	254.168	198.264	75.9524	71.7524	99.99	DOWN_AtMSCtrl_UP_AtC32I
AT5G19590	1660.9	1.00931	0.231392	4.3619	1.28935e-05	0.000131392	2715	1940	1029	1138	2455.75	1982.64	1116.5	1088.72	99.99	DOWN_AtMSCtrl_UP_AtC32I
AT2G43210	565.21	-1.20153	0.275502	-4.36124	1.2933e-05	0.000131636	443	278	696	858	400.698	284.11	755.184	820.848	99.99	UP_AtMSCtrl_DOWN_AtC32I
AT5G62220	310.24	1.27606	0.292588	4.36129	1.29295e-05	0.000131636	494	422	181	174	446.828	431.275	196.391	166.466	99.99	DOWN_AtMSCtrl_UP_AtC32I
AT4G04020	949.595	1.03185	0.236653	4.36017	1.29962e-05	0.000132201	1394	1262	613	609	1260.89	1289.74	665.126	582.63	99.99	DOWN_AtMSCtrl_UP_AtC32I
AT1G11200	184.732	1.7619	0.404228	4.35869	1.30846e-05	0.00013302	341	257	48	121	308.438	262.649	52.0817	115.761	99.99	DOWN_AtMSCtrl_UP_AtC32I
AT2G25520	2069.46	0.945589	0.217044	4.35667	1.32055e-05	0.000134169	3048	2634	1260	1528	2756.95	2691.89	1367.14	1461.84	99.99	DOWN_AtMSCtrl_UP_AtC32I
AT3G15120	331.067	-1.52066	0.349114	-4.35577	1.32599e-05	0.000134561	249	114	507	452	225.223	116.506	550.113	432.428	99.99	UP_AtMSCtrl_DOWN_AtC32I
AT3G17850	1302.88	-1.11949	0.257007	-4.35588	1.32534e-05	0.000134561	1080	651	1587	1931	976.872	665.308	1721.95	1847.39	99.99	UP_AtMSCtrl_DOWN_AtC32I
AT1G07990	922.914	-1.10846	0.254489	-4.35563	1.32684e-05	0.000134567	747	483	1152	1330	675.67	493.616	1249.96	1272.41	99.99	UP_AtMSCtrl_DOWN_AtC32I
AT3G12110	87.5749	2.19614	0.504328	4.35459	1.33315e-05	0.000135069	177	125	17	46	160.098	127.747	18.4456	44.0081	99.99	DOWN_AtMSCtrl_UP_AtC32I
AT4G14920	392.699	-1.31409	0.301774	-4.35456	1.33337e-05	0.000135069	292	182	577	517	264.117	186	626.065	494.613	99.99	UP_AtMSCtrl_DOWN_AtC32I
AT1G64050	541.365	-1.22514	0.281431	-4.35327	1.34124e-05	0.000135785	423	260	744	742	382.608	265.714	807.266	709.871	99.99	UP_AtMSCtrl_DOWN_AtC32I
AT3G63380	184.705	-1.67834	0.385639	-4.35211	1.34832e-05	0.00013642	86	96	331	213	77.7879	98.11	359.146	203.777	99.99	UP_AtMSCtrl_DOWN_AtC32I
AT5G17190	738.047	1.1521	0.264874	4.34962	1.36373e-05	0.000137897	986	1120	374	533	891.848	1144.62	405.803	509.92	99.99	DOWN_AtMSCtrl_UP_AtC32I
AT1G01470	931.403	1.09309	0.251331	4.34922	1.36625e-05	0.00013807	1208	1413	557	611	1092.65	1444.06	604.364	584.543	99.99	DOWN_AtMSCtrl_UP_AtC32I
AT4G36080	295.004	-1.52803	0.351413	-4.34826	1.37223e-05	0.000138592	218	104	352	517	197.183	106.286	381.932	494.613	99.99	UP_AtMSCtrl_DOWN_AtC32I
AT4G24380	146.358	1.80926	0.416281	4.34626	1.3848e-05	0.000139779	196	272	75	51	177.284	277.978	81.3776	48.7916	99.99	DOWN_AtMSCtrl_UP_AtC32I
AT3G07390	1051.46	0.999885	0.230088	4.34567	1.38852e-05	0.000140071	1527	1392	660	717	1381.19	1422.59	716.123	685.953	99.99	DOWN_AtMSCtrl_UP_AtC32I
AT5G13820	128.243	-1.77292	0.407997	-4.34542	1.39011e-05	0.000140148	65	56	223	162	58.7932	57.2308	241.963	154.985	99.99	UP_AtMSCtrl_DOWN_AtC32I
AT1G08650	562.899	1.37098	0.315609	4.34394	1.39949e-05	0.00014101	911	782	379	227	824.009	799.187	411.228	217.171	99.99	DOWN_AtMSCtrl_UP_AtC32I
AT5G15540	530.466	-1.50903	0.34744	-4.34329	1.40362e-05	0.000141342	424	164	707	840	383.513	167.605	767.119	803.627	99.99	UP_AtMSCtrl_DOWN_AtC32I
AT5G13980	1827.61	-1.17294	0.270145	-4.34189	1.41261e-05	0.000142164	1546	829	2222	2774	1398.37	847.22	2410.95	2653.88	99.99	UP_AtMSCtrl_DOWN_AtC32I
AT2G42610	439.253	1.21525	0.279986	4.34038	1.42234e-05	0.000143058	649	627	277	239	587.028	640.781	300.555	228.651	99.99	DOWN_AtMSCtrl_UP_AtC32I
AT1G29250	265.661	1.36339	0.314197	4.33929	1.42945e-05	0.000143689	366	425	132	161	331.051	434.341	143.225	154.029	99.99	DOWN_AtMSCtrl_UP_AtC32I
AT5G17170	2084.16	1.11193	0.256372	4.33717	1.44328e-05	0.000144993	2511	3355	1148	1454	2271.23	3428.74	1245.62	1391.04	99.99	DOWN_AtMSCtrl_UP_AtC32I
AT3G51550	3664.73	-1.02366	0.236077	-4.33612	1.45018e-05	0.0001456	3014	2061	4981	4622	2726.2	2106.3	5404.56	4421.86	99.99	UP_AtMSCtrl_DOWN_AtC32I
AT2G35110	659.998	-1.18099	0.27238	-4.33581	1.45226e-05	0.000145723	529	322	860	940	478.486	329.077	933.13	899.297	99.99	UP_AtMSCtrl_DOWN_AtC32I
AT5G35490	319.893	1.36356	0.314548	4.33499	1.45766e-05	0.000146178	418	532	149	205	378.086	543.693	161.67	196.123	99.99	DOWN_AtMSCtrl_UP_AtC32I
AT1G20430	294.493	1.49627	0.345185	4.33468	1.4597e-05	0.000146297	346	545	134	170	312.961	556.978	145.395	162.639	99.99	DOWN_AtMSCtrl_UP_AtC32I
AT5G15230	1328.39	0.989587	0.22833	4.33403	1.46406e-05	0.000146647	1864	1808	860	885	1686.01	1847.74	933.13	846.678	99.99	DOWN_AtMSCtrl_UP_AtC32I
AT1G79570	613.168	-1.28659	0.296869	-4.33388	1.46504e-05	0.000146652	494	260	849	856	446.828	265.714	921.194	818.934	99.99	UP_AtMSCtrl_DOWN_AtC32I
AT3G14980	314.211	-1.41078	0.325532	-4.33376	1.46583e-05	0.000146652	237	126	403	498	214.369	128.769	437.269	476.436	99.99	UP_AtMSCtrl_DOWN_AtC32I
AT1G60000	1566.21	0.967628	0.223286	4.33358	1.46701e-05	0.000146684	2410	1923	974	1111	2179.87	1965.27	1056.82	1062.89	99.99	DOWN_AtMSCtrl_UP_AtC32I
AT4G37480	329.186	-1.2745	0.294138	-4.333	1.47088e-05	0.000146984	238	166	410	509	215.274	169.648	444.864	486.96	99.99	UP_AtMSCtrl_DOWN_AtC32I
AT1G71360	118.109	-1.74449	0.402675	-4.33225	1.47593e-05	0.000147316	59	54	189	166	53.3661	55.1869	205.072	158.812	99.99	UP_AtMSCtrl_DOWN_AtC32I
AT5G03190	209.676	1.47838	0.341249	4.33225	1.4759e-05	0.000147316	394	255	110	107	356.377	260.605	119.354	102.367	99.99	DOWN_AtMSCtrl_UP_AtC32I
AT1G21700	382.462	-1.41006	0.325495	-4.33204	1.47735e-05	0.000147371	297	146	487	610	268.64	149.209	528.412	583.586	99.99	UP_AtMSCtrl_DOWN_AtC32I
AT4G11560	395.044	-1.18587	0.273919	-4.32928	1.49597e-05	0.000149028	250	251	501	579	226.128	256.517	543.602	553.929	99.99	UP_AtMSCtrl_DOWN_AtC32I
AT4G39690	391.868	-1.23425	0.285097	-4.32924	1.49623e-05	0.000149028	294	197	507	575	265.926	201.33	550.113	550.102	99.99	UP_AtMSCtrl_DOWN_AtC32I
AT5G26667	526.886	1.14523	0.264536	4.32919	1.49659e-05	0.000149028	720	783	304	341	651.248	800.209	329.851	326.234	99.99	DOWN_AtMSCtrl_UP_AtC32I
AT1G27480	1479.63	1.0274	0.237423	4.32731	1.50944e-05	0.000150219	2403	1758	973	933	2173.54	1796.64	1055.74	892.6	99.98	DOWN_AtMSCtrl_UP_AtC32I
AT1G36380	369.279	1.21783	0.28144	4.32715	1.51053e-05	0.000150241	531	541	194	244	480.295	552.891	210.497	233.435	99.98	DOWN_AtMSCtrl_UP_AtC32I
AT5G24020	522.448	1.14262	0.264077	4.32683	1.51269e-05	0.000150367	734	758	281	362	663.911	774.66	304.895	346.325	99.98	DOWN_AtMSCtrl_UP_AtC32I
AT2G45920	142.102	-1.77401	0.410065	-4.32616	1.51733e-05	0.00015074	70	64	146	294	63.3158	65.4066	158.415	281.269	99.98	UP_AtMSCtrl_DOWN_AtC32I
AT1G23205	69.8255	2.31876	0.536163	4.32474	1.52715e-05	0.000151627	127	115	30	15	114.873	117.528	32.551	14.3505	99.98	DOWN_AtMSCtrl_UP_AtC32I
AT1G50600	935.717	-1.07153	0.247834	-4.32357	1.53525e-05	0.000152342	753	514	1165	1330	681.097	525.297	1264.07	1272.41	99.98	UP_AtMSCtrl_DOWN_AtC32I
AT2G47250	863.757	-1.15198	0.266471	-4.3231	1.53851e-05	0.0001524	707	423	1119	1222	639.489	432.297	1214.15	1169.09	99.98	UP_AtMSCtrl_DOWN_AtC32I
AT5G24670	1626.14	-1.20404	0.278511	-4.32313	1.5383e-05	0.0001524	1366	717	1905	2581	1235.56	732.759	2066.99	2469.24	99.98	UP_AtMSCtrl_DOWN_AtC32I
AT5G44520	549.768	1.09497	0.253279	4.32317	1.53804e-05	0.0001524	830	731	328	361	750.744	747.066	355.891	345.368	99.98	DOWN_AtMSCtrl_UP_AtC32I
AT5G46700	61.058	2.38585	0.551998	4.3222	1.54478e-05	0.000152932	133	83	14	25	120.3	84.8242	15.1905	23.9175	99.98	DOWN_AtMSCtrl_UP_AtC32I
AT5G24314	957.308	1.17246	0.271424	4.31966	1.56268e-05	0.000154614	1198	1535	605	544	1083.6	1568.74	656.446	520.444	99.98	DOWN_AtMSCtrl_UP_AtC32I
AT5G52960	1498.15	0.998092	0.231167	4.31763	1.57715e-05	0.000155955	2064	2081	853	1122	1866.91	2126.74	925.535	1073.42	99.98	DOWN_AtMSCtrl_UP_AtC32I
AT3G53900	260.068	1.37301	0.318054	4.31692	1.58224e-05	0.000156367	377	401	116	171	341.001	409.813	125.864	163.596	99.98	DOWN_AtMSCtrl_UP_AtC32I
AT4G37590	787.421	-1.05827	0.245171	-4.31646	1.58549e-05	0.000156597	612	458	957	1139	553.561	468.066	1038.38	1089.68	99.98	UP_AtMSCtrl_DOWN_AtC32I
AT3G54850	784.53	-1.11312	0.257953	-4.3152	1.59462e-05	0.000157407	570	466	1129	963	515.571	476.242	1225	921.301	99.98	UP_AtMSCtrl_DOWN_AtC32I
AT4G00370	1738.14	0.954926	0.22131	4.31488	1.59688e-05	0.00015754	2664	2130	1090	1237	2409.62	2176.81	1182.69	1183.44	99.98	DOWN_AtMSCtrl_UP_AtC32I
AT1G19520	325.665	-1.27394	0.29536	-4.31319	1.60917e-05	0.000158659	238	162	429	477	215.274	165.561	465.48	456.345	99.98	UP_AtMSCtrl_DOWN_AtC32I
AT5G16370	4573.37	-1.25205	0.290296	-4.313	1.61051e-05	0.0001587	2039	3489	6341	6275	1844.3	3565.68	6880.2	6003.29	99.98	UP_AtMSCtrl_DOWN_AtC32I
AT4G14440	308.622	1.32184	0.306489	4.31286	1.61155e-05	0.00015871	549	377	146	203	496.577	385.286	158.415	194.21	99.98	DOWN_AtMSCtrl_UP_AtC32I
AT1G09730	676.255	-1.19258	0.276581	-4.31186	1.61887e-05	0.000159338	547	321	890	958	494.767	328.055	965.681	916.517	99.98	UP_AtMSCtrl_DOWN_AtC32I
AT2G24850	90.9084	2.36192	0.547863	4.31116	1.62404e-05	0.000159598	163	154	11	49	147.435	157.385	11.9354	46.8782	99.98	DOWN_AtMSCtrl_UP_AtC32I
AT4G03210	487.633	1.16548	0.270343	4.31112	1.62432e-05	0.000159598	826	589	266	327	747.126	601.945	288.619	312.841	99.98	DOWN_AtMSCtrl_UP_AtC32I
AT5G22570	15.5793	7.37739	1.71116	4.31133	1.62273e-05	0.000159598	35	30	0	0	31.6579	30.6594	0	0	99.98	DOWN_AtMSCtrl_UP_AtC32I
AT5G19370	957.815	0.999815	0.232046	4.3087	1.64214e-05	0.000161256	1417	1245	589	667	1281.69	1272.36	639.085	638.118	99.98	DOWN_AtMSCtrl_UP_AtC32I
AT1G36070	559.141	-1.12178	0.260441	-4.30725	1.65293e-05	0.000161756	372	360	645	870	336.478	367.912	699.847	832.328	99.98	UP_AtMSCtrl_DOWN_AtC32I
AT3G46620	447.363	1.66008	0.385392	4.30751	1.651e-05	0.000161756	462	921	252	164	417.884	941.242	273.429	156.899	99.98	DOWN_AtMSCtrl_UP_AtC32I
AT3G48780	2116.72	-0.945337	0.219453	-4.3077	1.64963e-05	0.000161756	1505	1500	2526	2960	1361.29	1532.97	2740.8	2831.83	99.98	UP_AtMSCtrl_DOWN_AtC32I
AT3G50820	14585.3	1.09792	0.254893	4.30738	1.65202e-05	0.000161756	16845	24000	8885	9341	15236.5	24527.5	9640.53	8936.52	99.98	DOWN_AtMSCtrl_UP_AtC32I
AT4G36500	2596.4	1.11042	0.257788	4.3075	1.65108e-05	0.000161756	3057	4240	1544	1685	2765.09	4333.19	1675.29	1612.04	99.98	DOWN_AtMSCtrl_UP_AtC32I
AT5G17630	377.787	1.28959	0.29939	4.30739	1.65194e-05	0.000161756	695	434	215	215	628.635	443.539	233.282	205.69	99.98	DOWN_AtMSCtrl_UP_AtC32I
AT2G32560	1186.4	0.987163	0.229225	4.30652	1.65843e-05	0.000162161	1734	1552	694	876	1568.42	1586.11	753.014	838.068	99.98	DOWN_AtMSCtrl_UP_AtC32I
AT5G67150	225.891	1.36051	0.315925	4.30645	1.65899e-05	0.000162161	345	331	117	132	312.056	338.275	126.949	126.284	99.98	DOWN_AtMSCtrl_UP_AtC32I
AT3G57062	344.961	1.26976	0.294878	4.30606	1.66192e-05	0.000162354	516	498	160	241	466.728	508.945	173.606	230.564	99.98	DOWN_AtMSCtrl_UP_AtC32I
AT5G42920	594.824	-1.17068	0.27189	-4.30571	1.66454e-05	0.000162517	472	298	741	882	426.929	304.55	804.011	843.808	99.98	UP_AtMSCtrl_DOWN_AtC32I
AT3G56650	1089	1.08718	0.252552	4.30477	1.67157e-05	0.00016311	1760	1340	736	623	1591.94	1369.45	798.585	596.023	99.98	DOWN_AtMSCtrl_UP_AtC32I
AT1G18720	1816.03	0.976683	0.226966	4.30321	1.68341e-05	0.000164171	2791	2243	1037	1382	2524.49	2292.3	1125.18	1322.16	99.98	DOWN_AtMSCtrl_UP_AtC32I
AT1G05205	177.541	1.59552	0.370851	4.30231	1.69026e-05	0.000164745	283	272	61	115	255.977	277.978	66.1871	110.02	99.98	DOWN_AtMSCtrl_UP_AtC32I
AT3G56950	359.255	1.25359	0.291467	4.30098	1.70044e-05	0.000165642	575	482	168	253	520.094	492.594	182.286	242.045	99.98	DOWN_AtMSCtrl_UP_AtC32I
AT3G57470	1189.94	-1.55713	0.36207	-4.30063	1.70314e-05	0.00016581	977	316	1468	2049	883.707	322.945	1592.83	1960.28	99.98	UP_AtMSCtrl_DOWN_AtC32I
AT1G61740	4621.27	0.90922	0.211427	4.30039	1.70495e-05	0.000165891	6589	5971	3129	3165	5959.82	6102.24	3395.07	3027.95	99.98	DOWN_AtMSCtrl_UP_AtC32I
AT1G28370	231.689	1.58309	0.368468	4.29641	1.73586e-05	0.000168803	280	432	123	103	253.263	441.495	133.459	98.54	99.98	DOWN_AtMSCtrl_UP_AtC32I
AT1G55510	610.98	-1.21876	0.283696	-4.29598	1.7392e-05	0.000168974	401	364	623	1080	362.709	372	675.977	1033.23	99.98	UP_AtMSCtrl_DOWN_AtC32I
AT2G19270	664.116	-1.10326	0.256816	-4.29593	1.73961e-05	0.000168974	429	446	907	866	388.035	455.803	984.126	828.501	99.98	UP_AtMSCtrl_DOWN_AtC32I
AT2G32690	1512.35	0.969454	0.225838	4.2927	1.76513e-05	0.000171355	2162	2005	882	1137	1955.55	2049.07	957.001	1087.77	99.98	DOWN_AtMSCtrl_UP_AtC32I
AT3G02840	45.9681	3.12658	0.728575	4.29136	1.77582e-05	0.000172294	68	101	15	3	61.5067	103.22	16.2755	2.8701	99.98	DOWN_AtMSCtrl_UP_AtC32I
AT5G67590	984.794	1.09593	0.255552	4.28849	1.79894e-05	0.000174438	1259	1512	544	695	1138.78	1545.23	590.259	664.906	99.98	DOWN_AtMSCtrl_UP_AtC32I
AT3G54350	602.895	-1.08544	0.253152	-4.28771	1.80527e-05	0.000174952	455	353	734	881	411.552	360.759	796.415	842.852	99.98	UP_AtMSCtrl_DOWN_AtC32I
AT5G17440	373.207	-1.39055	0.324349	-4.28722	1.80922e-05	0.000175235	167	256	455	613	151.053	261.627	493.691	586.456	99.98	UP_AtMSCtrl_DOWN_AtC32I
AT1G73650	415.619	1.35877	0.316954	4.28695	1.8114e-05	0.000175346	636	608	156	310	575.269	621.363	169.265	296.577	99.98	DOWN_AtMSCtrl_UP_AtC32I
AT3G14090	513.473	-1.16294	0.271325	-4.28615	1.818e-05	0.000175784	399	267	659	737	360.9	272.868	715.038	705.087	99.98	UP_AtMSCtrl_DOWN_AtC32I
AT4G25470	55.1376	2.8463	0.664068	4.28615	1.81794e-05	0.000175784	58	138	17	9	52.4616	141.033	18.4456	8.61029	99.98	DOWN_AtMSCtrl_UP_AtC32I
AT3G60240	1083.59	-1.1135	0.259916	-4.28407	1.83503e-05	0.000177331	727	697	1615	1267	657.579	712.319	1752.33	1212.14	99.98	UP_AtMSCtrl_DOWN_AtC32I
AT2G24395	142.688	1.64347	0.383706	4.28314	1.84273e-05	0.000177973	199	247	64	72	179.998	252.429	69.4422	68.8823	99.98	DOWN_AtMSCtrl_UP_AtC32I
AT2G41950	161.178	1.72787	0.403534	4.28184	1.85351e-05	0.000178913	329	193	87	58	297.584	197.242	94.398	55.4885	99.98	DOWN_AtMSCtrl_UP_AtC32I
AT1G55850	4672.36	-0.913068	0.213278	-4.28112	1.85956e-05	0.000179395	3347	3381	5779	6205	3027.4	3455.31	6270.42	5936.32	99.98	UP_AtMSCtrl_DOWN_AtC32I
AT4G02350	601.282	-1.12073	0.261796	-4.2809	1.86135e-05	0.000179466	469	326	733	891	424.216	333.165	795.33	852.419	99.98	UP_AtMSCtrl_DOWN_AtC32I
AT4G17050	1041.96	0.984477	0.230055	4.2793	1.8748e-05	0.000180661	1557	1331	638	739	1408.32	1360.25	692.252	707	99.98	DOWN_AtMSCtrl_UP_AtC32I
AT5G47870	355.041	1.21542	0.284051	4.27888	1.87832e-05	0.000180897	511	519	208	211	462.205	530.407	225.687	201.863	99.98	DOWN_AtMSCtrl_UP_AtC32I
AT5G01400	376.397	-1.23781	0.289326	-4.27827	1.88353e-05	0.000181296	264	205	426	622	238.791	209.506	462.225	595.067	99.98	UP_AtMSCtrl_DOWN_AtC32I
AT1G77300	386.821	-1.29253	0.302176	-4.2774	1.8909e-05	0.000181903	300	173	506	575	271.353	176.802	549.028	550.102	99.98	UP_AtMSCtrl_DOWN_AtC32I
AT1G76700	521.415	-1.23446	0.288631	-4.27694	1.89483e-05	0.000182178	415	241	643	801	375.372	246.297	697.677	766.316	99.98	UP_AtMSCtrl_DOWN_AtC32I
AT1G27320	2179.19	-1.02336	0.23932	-4.27613	1.90168e-05	0.000182733	1827	1195	2821	2908	1652.54	1221.26	3060.88	2782.08	99.98	UP_AtMSCtrl_DOWN_AtC32I
AT5G02880	797.004	-1.38679	0.324395	-4.27502	1.91123e-05	0.000183547	639	297	864	1431	577.982	303.528	937.47	1369.04	99.98	UP_AtMSCtrl_DOWN_AtC32I
AT5G48930	3091.18	0.957398	0.224042	4.2733	1.92605e-05	0.000184866	5003	3558	1912	2225	4525.27	3636.2	2074.59	2128.65	99.98	DOWN_AtMSCtrl_UP_AtC32I
AT2G02100	814.081	1.13716	0.266443	4.26795	1.97274e-05	0.000189241	1037	1273	428	578	937.978	1300.98	464.395	552.972	99.98	DOWN_AtMSCtrl_UP_AtC32I
AT3G06125	240.183	1.45053	0.339891	4.26764	1.97555e-05	0.000189403	309	415	110	144	279.494	424.121	119.354	137.765	99.98	DOWN_AtMSCtrl_UP_AtC32I
AT2G37080	87.6862	-2.08305	0.488329	-4.26567	1.99306e-05	0.000190975	50	21	141	137	45.2255	21.4616	152.99	131.068	99.98	UP_AtMSCtrl_DOWN_AtC32I
AT5G48840	203.62	1.38854	0.325537	4.2654	1.99544e-05	0.000191095	325	289	107	114	293.966	295.352	116.099	109.064	99.98	DOWN_AtMSCtrl_UP_AtC32I
AT2G43160	7544.87	-0.967675	0.226885	-4.26505	1.99861e-05	0.000191291	4974	5589	9940	9599	4499.04	5711.84	10785.2	9183.35	99.98	UP_AtMSCtrl_DOWN_AtC32I
AT1G53165	316.25	-1.29816	0.304478	-4.26355	2.01207e-05	0.000192324	229	155	374	516	207.133	158.407	405.803	493.657	99.98	UP_AtMSCtrl_DOWN_AtC32I
AT2G24860	950.02	1.034	0.242525	4.26347	2.0128e-05	0.000192324	1317	1333	529	703	1191.24	1362.3	573.983	672.559	99.98	DOWN_AtMSCtrl_UP_AtC32I
AT5G48160	6352.27	-1.24719	0.29252	-4.2636	2.01164e-05	0.000192324	2846	4851	9157	8301	2574.24	4957.62	9935.66	7941.56	99.98	UP_AtMSCtrl_DOWN_AtC32I
AT1G62430	669.05	1.06605	0.250087	4.26271	2.0196e-05	0.000192865	1070	825	413	436	967.827	843.132	448.119	417.121	99.98	DOWN_AtMSCtrl_UP_AtC32I
AT1G49720	507.351	-1.15648	0.27133	-4.26226	2.02373e-05	0.000193152	375	283	577	810	339.192	289.22	626.065	774.926	99.98	UP_AtMSCtrl_DOWN_AtC32I
AT3G05730	1050.24	1.12788	0.264717	4.26069	2.03794e-05	0.000194399	1304	1666	660	630	1179.48	1702.62	716.123	602.72	99.98	DOWN_AtMSCtrl_UP_AtC32I
AT4G10000	444.921	1.13446	0.266324	4.25971	2.04691e-05	0.000195145	710	568	255	293	642.203	580.484	276.684	280.313	99.98	DOWN_AtMSCtrl_UP_AtC32I
AT5G47330	48.9958	2.69735	0.633262	4.25946	2.04926e-05	0.000195259	67	107	9	17	60.6022	109.352	9.76531	16.2639	99.98	DOWN_AtMSCtrl_UP_AtC32I
AT4G34881	3302.1	0.934233	0.219406	4.25801	2.06255e-05	0.000196415	4380	4608	2033	2437	3961.76	4709.28	2205.88	2331.48	99.98	DOWN_AtMSCtrl_UP_AtC32I
AT3G12480	510.428	-1.25618	0.295193	-4.25545	2.08631e-05	0.000198568	262	358	723	684	236.982	365.868	784.48	654.382	99.98	UP_AtMSCtrl_DOWN_AtC32I
AT2G01870	231.199	1.38991	0.326653	4.25501	2.09035e-05	0.000198841	359	337	136	113	324.719	344.407	147.565	108.107	99.98	DOWN_AtMSCtrl_UP_AtC32I
AT5G58720	1065.62	-1.08231	0.254382	-4.25467	2.09354e-05	0.000199032	632	779	1280	1574	571.651	796.121	1388.84	1505.84	99.98	UP_AtMSCtrl_DOWN_AtC32I
AT3G28760	117.833	1.72233	0.404935	4.25334	2.10605e-05	0.00020011	211	167	58	49	190.852	170.67	62.932	46.8782	99.98	DOWN_AtMSCtrl_UP_AtC32I
AT2G39810	632.502	-1.18169	0.277866	-4.25274	2.11166e-05	0.000200531	505	310	879	839	456.778	316.813	953.745	802.67	99.98	UP_AtMSCtrl_DOWN_AtC32I
AT5G49430	288.716	-1.51585	0.356602	-4.25082	2.12991e-05	0.000202151	215	102	454	380	194.47	104.242	492.606	363.546	99.98	UP_AtMSCtrl_DOWN_AtC32I
AT1G19020	506.357	1.43944	0.338727	4.24956	2.14188e-05	0.000203174	545	966	223	317	492.958	987.231	241.963	303.274	99.98	DOWN_AtMSCtrl_UP_AtC32I
AT1G09330	332.759	1.30355	0.306782	4.24911	2.14619e-05	0.000203469	476	506	147	234	430.547	517.121	159.5	223.868	99.98	DOWN_AtMSCtrl_UP_AtC32I
AT1G34570	225.203	1.44342	0.339856	4.24714	2.16518e-05	0.000205156	376	312	88	153	340.096	318.857	95.483	146.375	99.98	DOWN_AtMSCtrl_UP_AtC32I
AT3G61440	11259.9	-0.865818	0.203881	-4.24669	2.1695e-05	0.000205451	8867	7767	13671	14893	8020.3	7937.71	14833.5	14248.1	99.98	UP_AtMSCtrl_DOWN_AtC32I
AT5G05320	288.704	-1.25167	0.294768	-4.24628	2.17352e-05	0.000205716	180	175	365	436	162.812	178.846	396.038	417.121	99.98	UP_AtMSCtrl_DOWN_AtC32I
AT5G22760	581.729	-1.22784	0.289173	-4.24604	2.17579e-05	0.000205816	471	264	715	894	426.025	269.802	775.8	855.289	99.98	UP_AtMSCtrl_DOWN_AtC32I
AT5G60030	170.103	-2.03141	0.478557	-4.24486	2.18727e-05	0.000206788	32	103	238	301	28.9444	105.264	258.238	287.966	99.98	UP_AtMSCtrl_DOWN_AtC32I
AT1G64640	275.533	1.30759	0.308065	4.24452	2.1906e-05	0.000206897	487	337	146	166	440.497	344.407	158.415	158.812	99.98	DOWN_AtMSCtrl_UP_AtC32I
AT5G40080	72.1906	2.14216	0.504692	4.2445	2.19086e-05	0.000206897	117	127	19	34	105.828	129.791	20.6157	32.5278	99.98	DOWN_AtMSCtrl_UP_AtC32I
AT1G09950	31.5034	3.62921	0.85525	4.24345	2.20114e-05	0.000207753	62	59	8	1	56.0797	60.2967	8.68028	0.956699	99.98	DOWN_AtMSCtrl_UP_AtC32I
AT1G77130	835.36	-1.20828	0.284852	-4.24178	2.21756e-05	0.000209186	687	379	1180	1100	621.399	387.33	1280.34	1052.37	99.98	UP_AtMSCtrl_DOWN_AtC32I
AT5G28750	540.951	1.1424	0.269697	4.23587	2.27668e-05	0.000214644	761	784	274	394	688.333	801.231	297.299	376.939	99.98	DOWN_AtMSCtrl_UP_AtC32I
AT1G52510	1613.13	0.992983	0.234466	4.23509	2.28462e-05	0.000215273	2129	2318	1055	1059	1925.7	2368.95	1144.71	1013.14	99.98	DOWN_AtMSCtrl_UP_AtC32I
AT5G14030	1832.39	0.949799	0.224337	4.2338	2.29771e-05	0.000216387	2840	2212	1098	1368	2568.81	2260.62	1191.37	1308.76	99.98	DOWN_AtMSCtrl_UP_AtC32I
AT4G36660	228.088	1.47306	0.34819	4.23063	2.33037e-05	0.000219311	368	331	83	158	332.86	338.275	90.0579	151.158	99.98	DOWN_AtMSCtrl_UP_AtC32I
AT5G49580	502.175	-1.15391	0.272758	-4.23054	2.33134e-05	0.000219311	382	271	693	663	345.523	276.956	751.929	634.291	99.98	UP_AtMSCtrl_DOWN_AtC32I
AT1G68560	6372.91	-0.950142	0.224633	-4.22975	2.33948e-05	0.000219834	5371	3753	8210	8247	4858.13	3835.49	8908.13	7889.9	99.98	UP_AtMSCtrl_DOWN_AtC32I
AT4G18590	209.507	1.45314	0.34355	4.22978	2.33916e-05	0.000219834	280	353	98	123	253.263	360.759	106.333	117.674	99.98	DOWN_AtMSCtrl_UP_AtC32I
AT4G37870	4388.77	-0.879665	0.20799	-4.22936	2.34357e-05	0.000220096	3467	2980	5229	5958	3135.94	3045.5	5673.65	5700.01	99.98	UP_AtMSCtrl_DOWN_AtC32I
AT1G52410	1399.26	-0.954702	0.225739	-4.22922	2.34502e-05	0.000220111	1036	947	1791	1828	937.073	967.814	1943.3	1748.85	99.98	UP_AtMSCtrl_DOWN_AtC32I
AT1G11660	464.037	-1.39092	0.328922	-4.22872	2.35029e-05	0.000220315	375	169	597	728	339.192	172.714	647.766	696.477	99.98	UP_AtMSCtrl_DOWN_AtC32I
AT1G54490	1123.59	-1.07768	0.254852	-4.22864	2.35108e-05	0.000220315	937	584	1439	1556	847.527	596.836	1561.36	1488.62	99.98	UP_AtMSCtrl_DOWN_AtC32I
AT4G32480	1893.24	-1.38742	0.328098	-4.22868	2.35068e-05	0.000220315	698	1432	2744	2614	631.349	1463.47	2977.34	2500.81	99.98	UP_AtMSCtrl_DOWN_AtC32I
AT1G74740	356.218	-1.17395	0.277662	-4.22797	2.35814e-05	0.000220855	242	214	447	525	218.892	218.703	485.01	502.267	99.98	UP_AtMSCtrl_DOWN_AtC32I
AT1G74930	345.86	1.40987	0.333484	4.22771	2.36086e-05	0.000220866	402	628	165	208	363.613	641.803	179.031	198.993	99.98	DOWN_AtMSCtrl_UP_AtC32I
AT5G20270	263.979	1.27276	0.301051	4.22772	2.36072e-05	0.000220866	402	375	142	162	363.613	383.242	154.075	154.985	99.98	DOWN_AtMSCtrl_UP_AtC32I
AT3G44670	907.767	-1.39904	0.330963	-4.2272	2.36621e-05	0.00022122	754	309	1062	1548	682.001	315.791	1152.31	1480.97	99.98	UP_AtMSCtrl_DOWN_AtC32I
AT4G38440	478.382	-1.1443	0.270706	-4.2271	2.36725e-05	0.00022122	346	277	545	759	312.961	283.088	591.344	726.134	99.98	UP_AtMSCtrl_DOWN_AtC32I
AT1G22730	543.899	-1.18089	0.279467	-4.22552	2.3839e-05	0.000222532	425	275	764	712	384.417	281.044	828.966	681.17	99.98	UP_AtMSCtrl_DOWN_AtC32I
AT1G65290	1428.4	0.952432	0.225397	4.22557	2.38332e-05	0.000222532	2055	1867	946	962	1858.77	1908.03	1026.44	920.344	99.98	DOWN_AtMSCtrl_UP_AtC32I
AT1G09750	4235.84	0.948553	0.224496	4.22526	2.38668e-05	0.00022267	6906	4808	2735	2943	6246.55	4913.67	2967.57	2815.56	99.98	DOWN_AtMSCtrl_UP_AtC32I
AT3G11660	2239.44	0.929374	0.21998	4.2248	2.39151e-05	0.000222876	3436	2706	1476	1550	3107.9	2765.47	1601.51	1482.88	99.98	DOWN_AtMSCtrl_UP_AtC32I
AT5G08280	3954.11	0.888696	0.210349	4.22487	2.39082e-05	0.000222876	5821	4897	2480	2985	5265.16	5004.63	2690.89	2855.75	99.98	DOWN_AtMSCtrl_UP_AtC32I
AT4G01897	141.589	1.70353	0.403243	4.22457	2.39394e-05	0.00022298	211	237	77	52	190.852	242.209	83.5477	49.7483	99.98	DOWN_AtMSCtrl_UP_AtC32I
AT1G07770	4159.66	1.10506	0.261634	4.22368	2.4034e-05	0.00022369	4781	6883	2310	2899	4324.47	7034.28	2506.43	2773.47	99.98	DOWN_AtMSCtrl_UP_AtC32I
AT3G11540	833.197	-1.08682	0.257328	-4.22349	2.40551e-05	0.00022369	666	454	1133	1084	602.404	463.978	1229.34	1037.06	99.98	UP_AtMSCtrl_DOWN_AtC32I
AT5G56210	211.018	-1.69756	0.401933	-4.22349	2.40551e-05	0.00022369	155	57	297	338	140.199	58.2528	322.255	323.364	99.98	UP_AtMSCtrl_DOWN_AtC32I
AT2G40070	722.066	-1.06297	0.251712	-4.22295	2.41123e-05	0.0002241	543	434	984	926	491.149	443.539	1067.67	885.903	99.98	UP_AtMSCtrl_DOWN_AtC32I
AT4G38660	143.532	1.73833	0.411733	4.22198	2.4217e-05	0.00022495	292	174	46	86	264.117	177.824	49.9116	82.2761	99.98	DOWN_AtMSCtrl_UP_AtC32I
AT4G32915	497.172	1.22247	0.289669	4.22022	2.44065e-05	0.000226586	769	682	217	377	695.569	696.99	235.453	360.675	99.98	DOWN_AtMSCtrl_UP_AtC32I
AT4G13980	399.564	-1.26975	0.300898	-4.21988	2.44437e-05	0.000226807	277	213	620	478	250.55	217.681	672.721	457.302	99.98	UP_AtMSCtrl_DOWN_AtC32I
AT1G61140	356.024	-1.31749	0.312226	-4.21966	2.44675e-05	0.000226905	272	158	422	584	246.027	161.473	457.885	558.712	99.98	UP_AtMSCtrl_DOWN_AtC32I
AT3G21670	220.227	1.4846	0.351868	4.21918	2.4519e-05	0.000227259	386	293	133	92	349.141	299.44	144.31	88.0163	99.98	DOWN_AtMSCtrl_UP_AtC32I
AT4G27610	633.509	-1.12563	0.266824	-4.21862	2.45806e-05	0.000227706	425	403	920	773	384.417	411.857	998.232	739.528	99.98	UP_AtMSCtrl_DOWN_AtC32I
AT2G17550	945.912	-1.02464	0.242921	-4.21802	2.4646e-05	0.000228062	759	548	1207	1283	686.524	560.044	1309.64	1227.44	99.98	UP_AtMSCtrl_DOWN_AtC32I
AT3G61600	2362.49	-0.909752	0.215681	-4.21805	2.4642e-05	0.000228062	1774	1642	2940	3112	1604.6	1678.09	3190	2977.25	99.98	UP_AtMSCtrl_DOWN_AtC32I
AT1G32920	893.75	1.37904	0.327002	4.21722	2.47331e-05	0.000228744	964	1674	374	613	871.949	1710.79	405.803	586.456	99.98	DOWN_AtMSCtrl_UP_AtC32I
AT4G01480	238.083	1.318	0.312752	4.21419	2.50675e-05	0.000231711	400	311	127	141	361.804	317.835	137.799	134.895	99.98	DOWN_AtMSCtrl_UP_AtC32I
AT1G79270	328.628	-1.23134	0.29222	-4.21375	2.5117e-05	0.000231923	226	184	468	433	204.419	188.044	507.796	414.251	99.98	UP_AtMSCtrl_DOWN_AtC32I
AT2G09795	158.17	1.51065	0.358505	4.21374	2.51177e-05	0.000231923	242	244	81	80	218.892	249.363	87.8878	76.5359	99.98	DOWN_AtMSCtrl_UP_AtC32I
AT1G33060	339.783	-1.22516	0.290783	-4.21331	2.51655e-05	0.000232238	250	177	419	520	226.128	180.89	454.63	497.483	99.98	UP_AtMSCtrl_DOWN_AtC32I
AT2G31800	2521.33	-0.961752	0.228357	-4.21162	2.53547e-05	0.000233857	2109	1481	2958	3611	1907.61	1513.55	3209.53	3454.64	99.98	UP_AtMSCtrl_DOWN_AtC32I
AT5G09540	214.943	-1.41884	0.336905	-4.2114	2.5379e-05	0.000233954	112	130	320	291	101.305	132.857	347.211	278.399	99.98	UP_AtMSCtrl_DOWN_AtC32I
AT1G55110	1402.51	-0.993254	0.235938	-4.20982	2.5558e-05	0.000235477	1068	890	1912	1735	966.018	909.561	2074.59	1659.87	99.98	UP_AtMSCtrl_DOWN_AtC32I
AT2G33255	457.743	1.11215	0.264294	4.20798	2.57662e-05	0.000237138	680	623	279	289	615.067	636.693	302.725	276.486	99.98	DOWN_AtMSCtrl_UP_AtC32I
AT4G29070	720.074	1.07616	0.255742	4.20801	2.57632e-05	0.000237138	983	1042	389	527	889.134	1064.9	422.078	504.18	99.98	DOWN_AtMSCtrl_UP_AtC32I
AT4G25490	79.3694	2.33582	0.555328	4.20619	2.5971e-05	0.000238894	83	186	20	32	75.0744	190.088	21.7007	30.6144	99.98	DOWN_AtMSCtrl_UP_AtC32I
AT1G79670	625.948	-1.10477	0.262674	-4.20584	2.60116e-05	0.000239138	485	348	856	816	438.688	355.649	928.79	780.666	99.98	UP_AtMSCtrl_DOWN_AtC32I
AT1G27430	880.674	-1.02103	0.242772	-4.20571	2.60265e-05	0.000239145	699	519	1050	1276	632.253	530.407	1139.29	1220.75	99.98	UP_AtMSCtrl_DOWN_AtC32I
AT2G03890	5810.41	-0.962647	0.228957	-4.20448	2.61682e-05	0.000240318	3720	4420	7178	7914	3364.78	4517.15	7788.38	7571.31	99.98	UP_AtMSCtrl_DOWN_AtC32I
AT2G44310	959.884	1.28977	0.30677	4.20434	2.61844e-05	0.000240337	1040	1746	551	540	940.691	1784.37	597.854	516.617	99.98	DOWN_AtMSCtrl_UP_AtC32I
AT4G35310	1570.37	-1.1072	0.263365	-4.20405	2.62177e-05	0.000240513	1331	770	2131	2068	1203.9	786.924	2312.21	1978.45	99.98	UP_AtMSCtrl_DOWN_AtC32I
AT1G17210	1438.22	-0.939026	0.223377	-4.20377	2.62509e-05	0.000240687	1118	940	1790	1922	1011.24	960.66	1942.21	1838.78	99.98	UP_AtMSCtrl_DOWN_AtC32I
AT2G01190	3376.87	-1.03782	0.246979	-4.20206	2.64502e-05	0.000242124	2042	2522	4638	4234	1847.01	2577.43	5032.39	4050.66	99.98	UP_AtMSCtrl_DOWN_AtC32I
AT2G17980	516.016	-1.10299	0.262477	-4.20224	2.64286e-05	0.000242124	352	330	702	676	318.388	337.253	761.694	646.728	99.98	UP_AtMSCtrl_DOWN_AtC32I
AT5G40670	448.524	1.2998	0.30932	4.20212	2.64424e-05	0.000242124	776	562	181	336	701.9	574.352	196.391	321.451	99.98	DOWN_AtMSCtrl_UP_AtC32I
AT2G32000	562.151	-1.13217	0.269442	-4.20193	2.64651e-05	0.00024213	443	297	673	851	400.698	303.528	730.228	814.151	99.98	UP_AtMSCtrl_DOWN_AtC32I
AT3G56310	2063.36	-0.959313	0.228322	-4.20158	2.65053e-05	0.000242367	1718	1222	2470	2896	1553.95	1248.86	2680.04	2770.6	99.98	UP_AtMSCtrl_DOWN_AtC32I
AT1G74520	934.761	1.00208	0.238628	4.19933	2.67703e-05	0.000244658	1344	1251	531	699	1215.66	1278.5	576.153	668.732	99.98	DOWN_AtMSCtrl_UP_AtC32I
AT2G36895	597.835	1.13441	0.270152	4.19914	2.67936e-05	0.00024474	940	776	290	453	850.24	793.056	314.66	433.385	99.98	DOWN_AtMSCtrl_UP_AtC32I
AT2G21380	653.147	-1.22937	0.292868	-4.19769	2.69647e-05	0.00024617	541	285	864	935	489.34	291.264	937.47	894.513	99.98	UP_AtMSCtrl_DOWN_AtC32I
AT5G43970	468.69	1.40076	0.333723	4.19736	2.70048e-05	0.000246404	531	861	200	311	480.295	879.924	217.007	297.533	99.98	DOWN_AtMSCtrl_UP_AtC32I
AT4G30270	12580.4	-1.16516	0.277649	-4.19651	2.7106e-05	0.000247195	6031	9848	16624	17523	5455.11	10064.4	18037.6	16764.2	99.98	UP_AtMSCtrl_DOWN_AtC32I
AT3G15710	294.98	1.35829	0.323689	4.19629	2.71328e-05	0.000247307	409	469	124	205	369.945	479.308	134.544	196.123	99.98	DOWN_AtMSCtrl_UP_AtC32I
AT3G57785	665.991	1.12588	0.268329	4.19591	2.71783e-05	0.000247456	862	1025	355	472	779.688	1047.53	385.187	451.562	99.98	DOWN_AtMSCtrl_UP_AtC32I
AT4G32300	1032.33	-1.01901	0.242858	-4.19591	2.71782e-05	0.000247456	838	593	1323	1390	757.98	606.033	1435.5	1329.81	99.98	UP_AtMSCtrl_DOWN_AtC32I
AT3G01460	458.61	-1.44557	0.34453	-4.19578	2.71933e-05	0.000247461	370	154	672	641	334.669	157.385	729.143	613.244	99.98	UP_AtMSCtrl_DOWN_AtC32I
AT3G54190	851.59	-1.27043	0.302814	-4.19542	2.72372e-05	0.000247727	720	339	1086	1286	651.248	346.451	1178.35	1230.31	99.98	UP_AtMSCtrl_DOWN_AtC32I
AT5G67320	722.096	-1.02805	0.245064	-4.19501	2.72854e-05	0.000248033	559	435	894	1012	505.622	444.561	970.021	968.179	99.98	UP_AtMSCtrl_DOWN_AtC32I
AT3G13300	2017.48	-0.929156	0.221595	-4.19303	2.75249e-05	0.000250077	1559	1339	2608	2573	1410.13	1368.43	2829.77	2461.59	99.97	UP_AtMSCtrl_DOWN_AtC32I
AT4G34410	60.6228	2.2213	0.529819	4.19257	2.75809e-05	0.000250452	119	90	21	21	107.637	91.9781	22.7857	20.0907	99.97	DOWN_AtMSCtrl_UP_AtC32I
AT5G24780	1135.92	0.956891	0.228283	4.19168	2.76892e-05	0.000251301	1686	1442	730	787	1525.01	1473.69	792.075	752.922	99.97	DOWN_AtMSCtrl_UP_AtC32I
AT2G29210	1305.71	-1.02535	0.244654	-4.19101	2.7771e-05	0.000251909	846	935	1771	1652	765.216	955.55	1921.6	1580.47	99.97	UP_AtMSCtrl_DOWN_AtC32I
AT5G28390	44.3733	-2.66027	0.635131	-4.18854	2.80757e-05	0.000254537	10	15	60	92	9.04511	15.3297	65.1021	88.0163	99.97	UP_AtMSCtrl_DOWN_AtC32I
AT1G72920	388.337	1.35639	0.323868	4.18809	2.81317e-05	0.000254909	451	694	208	220	407.934	709.253	225.687	210.474	99.97	DOWN_AtMSCtrl_UP_AtC32I
AT5G45820	65.5349	-2.12885	0.508359	-4.1877	2.81795e-05	0.000255206	29	22	105	104	26.2308	22.4835	113.929	99.4967	99.97	UP_AtMSCtrl_DOWN_AtC32I
AT1G61010	612.729	-1.10601	0.264151	-4.18706	2.82597e-05	0.000255796	484	332	817	823	437.783	339.297	886.473	787.363	99.97	UP_AtMSCtrl_DOWN_AtC32I
AT5G08120	480.757	-1.09832	0.262338	-4.18666	2.83093e-05	0.000256109	329	308	574	719	297.584	314.769	622.81	687.866	99.97	UP_AtMSCtrl_DOWN_AtC32I
AT5G18630	2414.25	-0.900423	0.215077	-4.18651	2.83275e-05	0.000256138	1823	1683	2808	3388	1648.92	1719.99	3046.78	3241.3	99.97	UP_AtMSCtrl_DOWN_AtC32I
AT2G24690	122.08	-1.7364	0.414848	-4.18562	2.84385e-05	0.000257004	78	41	178	191	70.5519	41.9011	193.136	182.729	99.97	UP_AtMSCtrl_DOWN_AtC32I
AT3G26570	2213.61	0.941893	0.225067	4.18494	2.8524e-05	0.00025764	3466	2630	1482	1488	3135.03	2687.8	1608.02	1423.57	99.97	DOWN_AtMSCtrl_UP_AtC32I
AT3G18790	400.596	-1.21012	0.289263	-4.18345	2.87115e-05	0.000259059	288	218	587	504	260.499	222.791	636.915	482.176	99.97	UP_AtMSCtrl_DOWN_AtC32I
AT4G32610	655.682	-1.05275	0.251645	-4.18347	2.87095e-05	0.000259059	455	432	878	854	411.552	441.495	952.66	817.021	99.97	UP_AtMSCtrl_DOWN_AtC32I
AT1G04640	904.2	1.00477	0.240229	4.18256	2.88246e-05	0.000259803	1254	1252	585	594	1134.26	1279.52	634.745	568.279	99.97	DOWN_AtMSCtrl_UP_AtC32I
AT2G38370	100.545	-1.82635	0.436653	-4.18261	2.88178e-05	0.000259803	57	36	127	184	51.5571	36.7912	137.799	176.033	99.97	UP_AtMSCtrl_DOWN_AtC32I
AT2G38020	909.686	-0.977092	0.233619	-4.18242	2.88427e-05	0.000259828	675	602	1127	1244	610.545	615.231	1222.83	1190.13	99.97	UP_AtMSCtrl_DOWN_AtC32I
AT3G10650	1053.83	-0.962921	0.230247	-4.18212	2.88799e-05	0.000260026	814	678	1299	1439	736.272	692.902	1409.46	1376.69	99.97	UP_AtMSCtrl_DOWN_AtC32I
AT5G57345	1073.5	1.07937	0.258169	4.18086	2.90407e-05	0.000261335	1388	1624	561	805	1255.46	1659.69	608.704	770.143	99.97	DOWN_AtMSCtrl_UP_AtC32I
AT5G61240	552.073	1.24875	0.298718	4.18037	2.91038e-05	0.000261765	972	660	367	268	879.185	674.506	398.208	256.395	99.97	DOWN_AtMSCtrl_UP_AtC32I
AT1G25055	796.575	1.11732	0.267302	4.17997	2.91549e-05	0.000262086	1418	879	439	553	1282.6	898.319	476.33	529.054	99.97	DOWN_AtMSCtrl_UP_AtC32I
AT1G10830	472.091	1.19818	0.28678	4.17805	2.94016e-05	0.000264164	737	635	214	356	666.625	648.957	232.197	340.585	99.97	DOWN_AtMSCtrl_UP_AtC32I
AT4G02710	92.6657	-1.87925	0.449984	-4.17626	2.96348e-05	0.000266068	49	34	155	129	44.321	34.7473	168.18	123.414	99.97	UP_AtMSCtrl_DOWN_AtC32I
AT5G01542	266.356	-1.31456	0.314777	-4.17618	2.96449e-05	0.000266068	155	162	306	447	140.199	165.561	332.021	427.644	99.97	UP_AtMSCtrl_DOWN_AtC32I
AT3G03980	304.048	1.30737	0.313144	4.17497	2.98023e-05	0.000267341	395	498	170	173	357.282	508.945	184.456	165.509	99.97	DOWN_AtMSCtrl_UP_AtC32I
AT1G73850	116.088	-1.76646	0.423186	-4.1742	2.99034e-05	0.000268106	60	50	203	145	54.2707	51.0989	220.262	138.721	99.97	UP_AtMSCtrl_DOWN_AtC32I
AT3G32930	1609.43	0.961868	0.230521	4.17258	3.01171e-05	0.000269879	2119	2287	1026	1119	1916.66	2337.27	1113.25	1070.55	99.97	DOWN_AtMSCtrl_UP_AtC32I
AT5G04160	138.979	1.74253	0.417689	4.17184	3.02155e-05	0.000270619	260	189	40	88	235.173	193.154	43.4014	84.1895	99.97	DOWN_AtMSCtrl_UP_AtC32I
AT5G11790	535.917	1.06427	0.255133	4.17144	3.02677e-05	0.000270943	827	687	320	362	748.031	702.099	347.211	346.325	99.97	DOWN_AtMSCtrl_UP_AtC32I
AT2G44740	278.456	1.2493	0.29955	4.17058	3.03822e-05	0.000271825	426	390	163	160	385.322	398.572	176.861	153.072	99.97	DOWN_AtMSCtrl_UP_AtC32I
AT4G24200	349.469	-1.35221	0.324283	-4.16984	3.04809e-05	0.000272565	274	142	495	489	247.836	145.121	537.092	467.826	99.97	UP_AtMSCtrl_DOWN_AtC32I
AT1G30400	1449.96	-1.04116	0.249759	-4.16866	3.06397e-05	0.000273842	1222	774	1701	2151	1105.31	791.012	1845.64	2057.86	99.97	UP_AtMSCtrl_DOWN_AtC32I
AT5G27820	144.573	1.53037	0.367202	4.16765	3.07749e-05	0.000274905	250	199	71	75	226.128	203.374	77.0375	71.7524	99.97	DOWN_AtMSCtrl_UP_AtC32I
AT5G21170	9226.05	-0.951336	0.228302	-4.16701	3.08615e-05	0.000275534	6044	6960	12049	11760	5466.86	7112.97	13073.6	11250.8	99.97	UP_AtMSCtrl_DOWN_AtC32I
AT2G18090	916.16	-1.04876	0.25176	-4.16569	3.1041e-05	0.000276991	746	508	1070	1369	674.765	519.165	1160.99	1309.72	99.97	UP_AtMSCtrl_DOWN_AtC32I
AT3G42640	237.591	-1.45393	0.349067	-4.1652	3.11083e-05	0.000277446	160	107	252	442	144.722	109.352	273.429	422.861	99.97	UP_AtMSCtrl_DOWN_AtC32I
AT1G31480	369.653	-1.34438	0.322972	-4.16252	3.14754e-05	0.000280573	293	149	517	523	265.022	152.275	560.963	500.353	99.97	UP_AtMSCtrl_DOWN_AtC32I
AT3G14010	1790.86	-1.05168	0.252673	-4.16222	3.15166e-05	0.000280793	1535	922	2143	2621	1388.42	942.264	2325.23	2507.51	99.97	UP_AtMSCtrl_DOWN_AtC32I
AT5G26030	635.756	1.0784	0.259109	4.16196	3.15527e-05	0.000280968	865	923	405	395	782.402	943.286	439.439	377.896	99.97	DOWN_AtMSCtrl_UP_AtC32I
AT5G13560	1201.62	-0.969318	0.232913	-4.16172	3.15865e-05	0.000281121	968	733	1512	1611	875.567	749.11	1640.57	1541.24	99.97	UP_AtMSCtrl_DOWN_AtC32I
AT3G24870	486.952	-1.23235	0.296232	-4.16007	3.18153e-05	0.00028301	395	219	623	722	357.282	223.813	675.977	690.737	99.97	UP_AtMSCtrl_DOWN_AtC32I
AT5G13510	5428.59	0.891641	0.21436	4.15955	3.18873e-05	0.000283502	7493	7174	3760	3685	6777.5	7331.68	4079.73	3525.44	99.97	DOWN_AtMSCtrl_UP_AtC32I
AT1G75490	283.944	-1.52133	0.366182	-4.15457	3.25903e-05	0.000289601	109	191	448	372	98.5917	195.198	486.096	355.892	99.97	UP_AtMSCtrl_DOWN_AtC32I
AT1G67880	217.508	1.46221	0.352032	4.15362	3.27251e-05	0.000290647	310	350	130	95	280.398	357.693	141.055	90.8864	99.97	DOWN_AtMSCtrl_UP_AtC32I
AT1G11350	1003.33	-1.14795	0.276386	-4.15344	3.27512e-05	0.000290726	848	470	1358	1351	767.025	480.33	1473.48	1292.5	99.97	UP_AtMSCtrl_DOWN_AtC32I
AT4G24050	283.213	-1.30382	0.314011	-4.15214	3.29378e-05	0.000292231	149	188	361	433	134.772	192.132	391.698	414.251	99.97	UP_AtMSCtrl_DOWN_AtC32I
AT3G17840	182.889	1.41108	0.339882	4.15168	3.3004e-05	0.000292665	277	275	97	99	250.55	281.044	105.248	94.7132	99.97	DOWN_AtMSCtrl_UP_AtC32I
AT1G03350	625.122	-1.14447	0.275752	-4.15035	3.31961e-05	0.000293909	508	312	843	844	459.492	318.857	914.684	807.454	99.97	UP_AtMSCtrl_DOWN_AtC32I
AT3G56800	3089.76	1.03665	0.249768	4.15045	3.31821e-05	0.000293909	3731	4828	2009	1955	3374.73	4934.11	2179.83	1870.35	99.97	DOWN_AtMSCtrl_UP_AtC32I
AT4G25940	1062.86	-1.13871	0.274359	-4.15045	3.31827e-05	0.000293909	907	496	1338	1539	820.391	506.901	1451.78	1472.36	99.97	UP_AtMSCtrl_DOWN_AtC32I
AT1G53240	3495.16	0.928099	0.223701	4.14883	3.34183e-05	0.000295722	5413	4176	2421	2289	4896.12	4267.78	2626.87	2189.88	99.97	DOWN_AtMSCtrl_UP_AtC32I
AT1G73655	3291.56	0.871554	0.210184	4.14662	3.37423e-05	0.000298421	4723	4150	2159	2415	4272.01	4241.21	2342.59	2310.43	99.97	DOWN_AtMSCtrl_UP_AtC32I
AT2G37860	446.862	1.11258	0.268317	4.14651	3.37584e-05	0.000298421	707	570	276	278	639.489	582.528	299.47	265.962	99.97	DOWN_AtMSCtrl_UP_AtC32I
AT1G70730	1708.18	0.922942	0.222846	4.14162	3.44861e-05	0.000304696	2329	2316	1066	1257	2106.61	2366.9	1156.65	1202.57	99.97	DOWN_AtMSCtrl_UP_AtC32I
AT4G33690	196.644	-1.35736	0.327997	-4.13833	3.49846e-05	0.00030894	121	109	256	301	109.446	111.396	277.769	287.966	99.97	UP_AtMSCtrl_DOWN_AtC32I
AT4G02520	47604.4	-0.99356	0.24014	-4.13742	3.51236e-05	0.00030999	29112	36527	63968	59944	26332.1	37329.8	69407.5	57348.4	99.97	UP_AtMSCtrl_DOWN_AtC32I
AT5G04460	346.414	-1.47129	0.355614	-4.13731	3.514e-05	0.00030999	271	119	537	456	245.122	121.615	582.664	436.255	99.97	UP_AtMSCtrl_DOWN_AtC32I
AT4G13495	1914.91	-1.06101	0.256464	-4.13709	3.51742e-05	0.000310131	1316	1264	1900	3257	1190.34	1291.78	2061.57	3115.97	99.97	UP_AtMSCtrl_DOWN_AtC32I
AT3G25920	7515.28	0.881961	0.213208	4.13663	3.52448e-05	0.000310593	9875	10328	4940	5450	8932.05	10555	5360.07	5214.01	99.97	DOWN_AtMSCtrl_UP_AtC32I
AT2G21560	146.031	-1.63194	0.394526	-4.13645	3.52713e-05	0.000310665	75	73	251	177	67.8383	74.6045	272.344	169.336	99.97	UP_AtMSCtrl_DOWN_AtC32I
AT2G21460	81.7394	-2.04921	0.495465	-4.13593	3.53513e-05	0.000311057	42	25	92	171	37.9895	25.5495	99.8232	163.596	99.97	UP_AtMSCtrl_DOWN_AtC32I
AT3G02760	569.948	-1.28946	0.311771	-4.13593	3.53524e-05	0.000311057	469	232	818	764	424.216	237.099	887.558	730.918	99.97	UP_AtMSCtrl_DOWN_AtC32I
AT2G25930	2397.57	-0.909564	0.219934	-4.13562	3.53995e-05	0.000311311	1967	1519	2788	3380	1779.17	1552.39	3025.08	3233.64	99.97	UP_AtMSCtrl_DOWN_AtC32I
AT3G15360	7372.37	0.92389	0.223427	4.13508	3.54824e-05	0.000311878	9434	10546	4959	5015	8533.16	10777.8	5380.69	4797.84	99.97	DOWN_AtMSCtrl_UP_AtC32I
AT4G14365	662.573	1.05155	0.254315	4.13483	3.55222e-05	0.00031205	1078	795	416	430	975.063	812.473	451.374	411.38	99.97	DOWN_AtMSCtrl_UP_AtC32I
AT5G22050	503.995	-1.15635	0.279667	-4.13472	3.55387e-05	0.00031205	375	279	549	832	339.192	285.132	595.684	795.973	99.97	UP_AtMSCtrl_DOWN_AtC32I
AT1G73980	726.65	-1.11736	0.270355	-4.13294	3.58148e-05	0.000314313	591	374	834	1134	534.566	382.22	904.919	1084.9	99.97	UP_AtMSCtrl_DOWN_AtC32I
AT2G17710	279.537	1.53139	0.370575	4.13247	3.5889e-05	0.000314801	303	545	120	164	274.067	556.978	130.204	156.899	99.97	DOWN_AtMSCtrl_UP_AtC32I
AT2G46900	1887.54	-0.900164	0.217918	-4.13075	3.61584e-05	0.000317001	1413	1327	2262	2573	1278.07	1356.17	2454.35	2461.59	99.97	UP_AtMSCtrl_DOWN_AtC32I
AT2G18220	172.019	-1.58546	0.383868	-4.13023	3.62398e-05	0.0003173	122	60	222	288	110.35	61.3187	240.878	275.529	99.97	UP_AtMSCtrl_DOWN_AtC32I
AT3G43210	97.6834	-1.8845	0.456275	-4.13018	3.62485e-05	0.0003173	59	29	154	147	53.3661	29.6374	167.095	140.635	99.97	UP_AtMSCtrl_DOWN_AtC32I
AT4G30010	1010.94	1.16915	0.283069	4.13026	3.62348e-05	0.0003173	1189	1687	511	721	1075.46	1724.08	554.453	689.78	99.97	DOWN_AtMSCtrl_UP_AtC32I
AT5G08630	283.592	-1.3125	0.317833	-4.12953	3.63499e-05	0.000318024	215	128	378	417	194.47	130.813	410.143	398.943	99.97	UP_AtMSCtrl_DOWN_AtC32I
AT1G50740	355.696	1.1713	0.28365	4.12938	3.63741e-05	0.000318073	549	478	220	208	496.577	488.506	238.708	198.993	99.97	DOWN_AtMSCtrl_UP_AtC32I
AT1G54990	477.775	1.18708	0.28753	4.12855	3.65056e-05	0.000319058	749	636	321	246	677.479	649.978	348.296	235.348	99.97	DOWN_AtMSCtrl_UP_AtC32I
AT1G27385	493.468	1.22695	0.297197	4.12841	3.65287e-05	0.000319096	741	697	336	237	670.243	712.319	364.572	226.738	99.97	DOWN_AtMSCtrl_UP_AtC32I
AT1G53460	206.786	-1.36385	0.330441	-4.12737	3.66928e-05	0.000320365	117	123	295	288	105.828	125.703	320.085	275.529	99.97	UP_AtMSCtrl_DOWN_AtC32I
AT1G72610	35811	0.84977	0.205943	4.12623	3.6876e-05	0.000321799	48699	47043	24540	25600	44048.8	48076.9	26626.8	24491.5	99.97	DOWN_AtMSCtrl_UP_AtC32I
AT3G05130	52.9606	-2.34538	0.568498	-4.12558	3.69802e-05	0.000322543	16	20	89	84	14.4722	20.4396	96.5681	80.3627	99.97	UP_AtMSCtrl_DOWN_AtC32I
AT3G06010	587.546	-1.06493	0.258268	-4.12333	3.73431e-05	0.000325541	456	340	695	874	412.457	347.473	754.099	836.155	99.97	UP_AtMSCtrl_DOWN_AtC32I
AT1G45165	499.765	1.09002	0.264385	4.12285	3.74218e-05	0.00032606	810	614	282	348	732.654	627.495	305.98	332.931	99.97	DOWN_AtMSCtrl_UP_AtC32I
AT3G25780	98.4483	1.77459	0.430603	4.12117	3.76948e-05	0.000328271	154	162	37	51	139.295	165.561	40.1463	48.7916	99.97	DOWN_AtMSCtrl_UP_AtC32I
AT2G29670	1877.23	-1.0267	0.249146	-4.12087	3.77449e-05	0.000328371	1553	1044	2611	2304	1404.71	1066.95	2833.03	2204.23	99.97	UP_AtMSCtrl_DOWN_AtC32I
AT5G54270	58850.8	0.83858	0.203494	4.12091	3.77375e-05	0.000328371	84648	72812	40532	42278	76565	74412.3	43978.6	40447.3	99.97	DOWN_AtMSCtrl_UP_AtC32I
AT5G15270	686.546	-1.35881	0.329913	-4.11868	3.81048e-05	0.000331333	571	248	788	1172	516.476	253.451	855.007	1121.25	99.97	UP_AtMSCtrl_DOWN_AtC32I
AT1G50480	9245.07	-0.844507	0.20519	-4.11573	3.85959e-05	0.000335432	7306	6477	11291	12022	6608.36	6619.36	12251.1	11501.4	99.97	UP_AtMSCtrl_DOWN_AtC32I
AT2G22740	255.479	-1.25309	0.304483	-4.11548	3.86375e-05	0.000335621	170	145	347	359	153.767	148.187	376.507	343.455	99.97	UP_AtMSCtrl_DOWN_AtC32I
AT2G44670	1460.04	0.937712	0.227863	4.11525	3.86754e-05	0.000335779	1969	2012	899	1074	1780.98	2056.22	975.446	1027.49	99.97	DOWN_AtMSCtrl_UP_AtC32I
AT5G58350	637.151	-1.01497	0.246648	-4.11505	3.87101e-05	0.000335908	456	422	783	894	412.457	431.275	849.582	855.289	99.97	UP_AtMSCtrl_DOWN_AtC32I
AT5G35753	88.8303	-1.96507	0.477647	-4.11406	3.88766e-05	0.000337181	46	30	163	111	41.6075	30.6594	176.861	106.194	99.97	UP_AtMSCtrl_DOWN_AtC32I
AT5G67530	356.379	-1.15687	0.281228	-4.11363	3.89482e-05	0.00033763	244	216	422	550	220.701	220.747	457.885	526.184	99.97	UP_AtMSCtrl_DOWN_AtC32I
AT5G13530	642.963	-1.03495	0.251642	-4.11278	3.90917e-05	0.000338702	503	380	781	921	454.969	388.352	847.412	881.12	99.97	UP_AtMSCtrl_DOWN_AtC32I
AT1G26880	649.393	1.03357	0.251445	4.11053	3.94748e-05	0.000341826	890	920	387	452	805.015	940.22	419.908	432.428	99.97	DOWN_AtMSCtrl_UP_AtC32I
AT2G18230	391.469	1.22204	0.297303	4.11043	3.94925e-05	0.000341826	700	453	194	271	633.158	462.956	210.497	259.265	99.97	DOWN_AtMSCtrl_UP_AtC32I
AT3G01130	1398.71	0.958348	0.23317	4.11008	3.95526e-05	0.000342172	2188	1678	812	1066	1979.07	1714.88	881.048	1019.84	99.97	DOWN_AtMSCtrl_UP_AtC32I
AT1G08680	1166.46	-0.974204	0.23705	-4.10969	3.96185e-05	0.000342569	959	691	1403	1641	867.426	706.187	1522.3	1569.94	99.97	UP_AtMSCtrl_DOWN_AtC32I
AT5G13770	1238.22	-1.06526	0.259352	-4.10738	4.00172e-05	0.00034584	1039	647	1689	1588	939.787	661.22	1832.62	1519.24	99.97	UP_AtMSCtrl_DOWN_AtC32I
AT4G02030	429.603	-1.30163	0.316928	-4.10702	4.00804e-05	0.00034621	350	175	584	616	316.579	178.846	633.66	589.326	99.97	UP_AtMSCtrl_DOWN_AtC32I
AT2G18876	257.088	-1.24728	0.303716	-4.10674	4.01283e-05	0.000346448	163	154	345	365	147.435	157.385	374.337	349.195	99.97	UP_AtMSCtrl_DOWN_AtC32I
AT2G20570	3183.54	0.872559	0.212578	4.10466	4.0491e-05	0.000349401	4536	4044	2162	2250	4102.86	4132.88	2345.84	2152.57	99.97	DOWN_AtMSCtrl_UP_AtC32I
AT4G35750	13748.2	-0.957895	0.233429	-4.10358	4.06804e-05	0.000350858	8720	10570	17923	17619	7887.34	10802.3	19447.1	16856.1	99.96	UP_AtMSCtrl_DOWN_AtC32I
AT1G24240	141.901	1.51953	0.370414	4.10225	4.09151e-05	0.000352703	236	203	62	83	213.465	207.462	67.2721	79.406	99.96	DOWN_AtMSCtrl_UP_AtC32I
AT1G80190	327.046	-1.5594	0.380188	-4.10165	4.10211e-05	0.000353355	106	231	428	535	95.8782	236.077	464.395	511.834	99.96	UP_AtMSCtrl_DOWN_AtC32I
AT4G24750	1272.81	1.00629	0.24534	4.10159	4.10323e-05	0.000353355	1937	1612	666	1013	1752.04	1647.43	722.633	969.136	99.96	DOWN_AtMSCtrl_UP_AtC32I
AT1G17250	64.1169	-2.23838	0.545841	-4.10078	4.11754e-05	0.000354409	17	29	112	94	15.3767	29.6374	121.524	89.9297	99.96	UP_AtMSCtrl_DOWN_AtC32I
AT2G48070	2213.21	0.936662	0.228457	4.09994	4.13248e-05	0.000355515	3528	2567	1482	1495	3191.11	2623.42	1608.02	1430.26	99.96	DOWN_AtMSCtrl_UP_AtC32I
AT2G37920	548.513	1.11583	0.272166	4.09982	4.1347e-05	0.000355526	713	838	336	343	644.916	856.418	364.572	328.148	99.96	DOWN_AtMSCtrl_UP_AtC32I
AT2G40530	165.567	1.43914	0.351069	4.09931	4.14385e-05	0.000356132	283	223	78	98	255.977	227.901	84.6327	93.7565	99.96	DOWN_AtMSCtrl_UP_AtC32I
AT3G66652	54.2908	-2.29889	0.560945	-4.09825	4.16281e-05	0.000357581	18	20	94	82	16.2812	20.4396	101.993	78.4493	99.96	UP_AtMSCtrl_DOWN_AtC32I
AT1G73460	307.996	-1.4292	0.348774	-4.09779	4.17122e-05	0.000358075	244	110	429	453	220.701	112.418	465.48	433.385	99.96	UP_AtMSCtrl_DOWN_AtC32I
AT3G26650	39981.5	0.8998	0.219587	4.0977	4.17277e-05	0.000358075	50293	57370	25431	29488	45490.6	58630.9	27593.5	28211.1	99.96	DOWN_AtMSCtrl_UP_AtC32I
AT1G03770	86.7498	-1.89216	0.461816	-4.09722	4.18145e-05	0.000358639	44	33	148	118	39.7985	33.7253	160.585	112.89	99.96	UP_AtMSCtrl_DOWN_AtC32I
AT1G06149	316.356	-1.24746	0.304514	-4.09655	4.19348e-05	0.000359314	227	166	356	527	205.324	169.648	386.272	504.18	99.96	UP_AtMSCtrl_DOWN_AtC32I
AT2G37430	31.8903	3.09499	0.75551	4.09655	4.19355e-05	0.000359314	64	55	8	5	57.8887	56.2088	8.68028	4.78349	99.96	DOWN_AtMSCtrl_UP_AtC32I
AT3G03950	556.703	-1.08553	0.265144	-4.09412	4.23776e-05	0.000362919	428	319	635	862	387.131	326.011	688.997	824.674	99.96	UP_AtMSCtrl_DOWN_AtC32I
AT3G59020	1860.14	-0.939811	0.229594	-4.09337	4.25157e-05	0.000363736	1562	1112	2286	2520	1412.85	1136.44	2480.39	2410.88	99.96	UP_AtMSCtrl_DOWN_AtC32I
AT5G14780	14590.7	-1.05813	0.258492	-4.09348	4.24949e-05	0.000363736	7913	11525	18908	19767	7157.4	11778.3	20515.8	18911.1	99.96	UP_AtMSCtrl_DOWN_AtC32I
AT5G55620	409.767	1.11316	0.272223	4.08913	4.32985e-05	0.000370247	592	573	227	284	535.47	585.594	246.303	271.702	99.96	DOWN_AtMSCtrl_UP_AtC32I
AT5G03760	343.472	1.43993	0.352285	4.08739	4.36256e-05	0.000372857	728	338	147	220	658.484	345.429	159.5	210.474	99.96	DOWN_AtMSCtrl_UP_AtC32I
AT4G39660	961.219	-1.02847	0.251713	-4.08589	4.39074e-05	0.000374943	600	707	1136	1408	542.707	722.539	1232.6	1347.03	99.96	UP_AtMSCtrl_DOWN_AtC32I
AT5G37830	1227.61	-1.00969	0.247119	-4.08586	4.39138e-05	0.000374943	1018	693	1632	1579	920.792	708.231	1770.78	1510.63	99.96	UP_AtMSCtrl_DOWN_AtC32I
AT3G56710	272.051	1.3347	0.326698	4.08542	4.39965e-05	0.00037546	434	378	174	126	392.558	386.308	188.796	120.544	99.96	DOWN_AtMSCtrl_UP_AtC32I
AT2G22670	1836.94	0.896473	0.219478	4.08458	4.41568e-05	0.000376542	2642	2339	1132	1400	2389.72	2390.41	1228.26	1339.38	99.96	DOWN_AtMSCtrl_UP_AtC32I
AT4G26095	65.5291	-2.69065	0.658744	-4.08452	4.41675e-05	0.000376542	24	13	167	48	21.7083	13.2857	181.201	45.9215	99.96	UP_AtMSCtrl_DOWN_AtC32I
AT3G15353	13059.2	1.24601	0.305273	4.08163	4.47211e-05	0.00038107	12799	24627	7089	8153	11576.8	25168.3	7691.81	7799.97	99.96	DOWN_AtMSCtrl_UP_AtC32I
AT5G56600	401.655	1.40735	0.344989	4.07939	4.51533e-05	0.00038456	435	757	182	253	393.462	773.638	197.476	242.045	99.96	DOWN_AtMSCtrl_UP_AtC32I
AT4G16260	1546.62	-1.49801	0.367279	-4.07867	4.52947e-05	0.000385406	457	1179	1953	2560	413.362	1204.91	2119.07	2449.15	99.96	UP_AtMSCtrl_DOWN_AtC32I
AT5G16660	1825.8	0.925049	0.226803	4.07865	4.52979e-05	0.000385406	2426	2534	1112	1372	2194.34	2589.69	1206.56	1312.59	99.96	DOWN_AtMSCtrl_UP_AtC32I
[truncated: 15,009 more rows]

## Sheet: AtMSCtrlvsAtMSBc
baseMean	log2FoldChange	lfcSE	stat	pvalue	padj	AtC32I_1	AtC32I_2	AtC32IBc_1	AtC32IBc_2	AtC32I_1.1	AtC32I_2.1	AtC32IBc_1.1	AtC32IBc_2.1	Certeza	DE
AT5G44420	696.423	-3.89068	0.22305	-17.4431	3.88758e-68	6.48604e-64	87	73	1317	1589	73.4907	105.934	1259.93	1346.34	100	UP_AtMSCtrl_DOWN_AtMSBc
AT5G44430	350.072	-4.54162	0.29686	-15.2989	7.78076e-53	6.49071e-49	29	24	679	816	24.4969	34.8276	649.576	691.386	100	UP_AtMSCtrl_DOWN_AtMSBc
AT1G52400	5241.3	-1.87157	0.144377	-12.9631	1.98112e-38	1.10177e-34	2457	1673	8730	9572	2075.48	2427.78	8351.7	8110.23	100	UP_AtMSCtrl_DOWN_AtMSBc
AT1G52000	2145.91	-1.89121	0.151589	-12.4759	1.0102e-35	4.21354e-32	1128	598	3648	3863	952.845	867.789	3489.92	3273.07	100	UP_AtMSCtrl_DOWN_AtMSBc
AT3G25770	1174.96	-2.01237	0.171017	-11.7671	5.76599e-32	1.924e-28	512	347	1899	2298	432.497	503.55	1816.71	1947.07	100	UP_AtMSCtrl_DOWN_AtMSBc
AT3G28220	643.058	-2.28251	0.195262	-11.6895	1.44288e-31	4.01216e-28	252	156	1173	1193	212.87	226.38	1122.17	1010.81	100	UP_AtMSCtrl_DOWN_AtMSBc
AT3G45140	5406.82	-1.84409	0.163424	-11.2841	1.57307e-29	3.7493e-26	2402	1852	9262	9501	2029.02	2687.53	8860.64	8050.07	100	UP_AtMSCtrl_DOWN_AtMSBc
AT3G16470	1026.47	-1.88402	0.168044	-11.2115	3.58254e-29	7.47138e-26	511	306	1707	1885	431.652	444.052	1633.03	1597.14	100	UP_AtMSCtrl_DOWN_AtMSBc
AT1G52410	1029.42	-1.93349	0.172629	-11.2003	4.06416e-29	7.53404e-26	487	306	1791	1828	411.379	444.052	1713.39	1548.84	100	UP_AtMSCtrl_DOWN_AtMSBc
AT1G19670	2825.95	-1.74554	0.160919	-10.8473	2.05375e-27	3.42648e-24	1401	976	4902	4738	1183.45	1416.32	4689.58	4014.45	100	UP_AtMSCtrl_DOWN_AtMSBc
AT3G25760	764.102	-1.94136	0.18569	-10.4549	1.39213e-25	2.11149e-22	354	230	1328	1361	299.031	333.765	1270.45	1153.16	100	UP_AtMSCtrl_DOWN_AtMSBc
AT2G26560	2426.89	-1.47817	0.151513	-9.75608	1.73748e-22	2.41567e-19	1577	848	3514	4465	1332.12	1230.58	3361.73	3783.14	100	UP_AtMSCtrl_DOWN_AtMSBc
AT3G49620	868.478	-1.76998	0.197415	-8.96579	3.08072e-19	3.95374e-16	412	305	1262	1742	348.025	442.601	1207.31	1475.97	100	UP_AtMSCtrl_DOWN_AtMSBc
AT2G26020	158.897	-3.1998	0.358273	-8.9312	4.21425e-19	5.02219e-16	28	28	281	357	23.6522	40.6322	268.823	302.481	100	UP_AtMSCtrl_DOWN_AtMSBc
AT1G21100	385.839	-1.93841	0.221286	-8.75973	1.95715e-18	2.09573e-15	186	112	645	716	157.118	162.529	617.05	606.657	100	UP_AtMSCtrl_DOWN_AtMSBc
AT1G52040	1960.4	-1.62041	0.185047	-8.75674	2.00981e-18	2.09573e-15	1343	541	3195	3382	1134.46	785.073	3056.55	2865.52	100	UP_AtMSCtrl_DOWN_AtMSBc
AT4G08950	1538.06	1.40244	0.166257	8.43534	3.30255e-17	3.24116e-14	2386	1688	862	1018	2015.5	2449.54	824.646	862.538	100	DOWN_AtMSCtrl_UP_AtMSBc
AT4G18440	858.561	-1.64827	0.199281	-8.27106	1.32769e-16	1.23062e-13	414	334	1297	1604	349.714	484.685	1240.8	1359.05	100	UP_AtMSCtrl_DOWN_AtMSBc
AT1G55450	2104.86	-1.26629	0.154997	-8.16975	3.09029e-16	2.7136e-13	1353	918	3182	3423	1142.91	1332.16	3044.11	2900.26	100	UP_AtMSCtrl_DOWN_AtMSBc
AT2G05100	3236.4	-1.152	0.142406	-8.08955	5.98856e-16	4.99565e-13	2412	1364	4865	5045	2037.47	1979.37	4654.18	4274.56	100	UP_AtMSCtrl_DOWN_AtMSBc
AT2G39330	132.73	-2.96034	0.37482	-7.89805	2.83304e-15	2.25079e-12	30	25	216	310	25.3416	36.2788	206.64	262.659	100	UP_AtMSCtrl_DOWN_AtMSBc
AT5G47910	1538.33	-1.37793	0.174801	-7.88283	3.20045e-15	2.42711e-12	876	671	2338	2600	739.975	973.723	2236.69	2202.95	100	UP_AtMSCtrl_DOWN_AtMSBc
AT4G24350	977.286	-1.63356	0.208915	-7.81925	5.31401e-15	3.85474e-12	466	388	1368	1940	393.64	563.047	1308.72	1643.74	100	UP_AtMSCtrl_DOWN_AtMSBc
AT4G33150	4852.83	-1.07931	0.141789	-7.61205	2.69787e-14	1.87547e-11	3775	2099	6464	8253	3188.82	3045.97	6183.89	6992.66	100	UP_AtMSCtrl_DOWN_AtMSBc
AT1G08630	1199.15	-1.27016	0.16797	-7.56184	3.97408e-14	2.65214e-11	772	521	1713	2065	652.124	756.05	1638.77	1749.65	100	UP_AtMSCtrl_DOWN_AtMSBc
AT5G24160	307.114	-1.8088	0.240497	-7.52107	5.43305e-14	3.48635e-11	166	91	523	538	140.224	132.055	500.336	455.84	100	UP_AtMSCtrl_DOWN_AtMSBc
AT2G38470	2601.88	-1.39419	0.185808	-7.50337	6.21954e-14	3.84321e-11	1376	1179	4123	4237	1162.34	1710.91	3944.33	3589.95	100	UP_AtMSCtrl_DOWN_AtMSBc
AT3G18080	1428.27	-1.16294	0.157645	-7.37693	1.6198e-13	9.65171e-11	1012	627	2130	2255	854.857	909.872	2037.7	1910.63	100	UP_AtMSCtrl_DOWN_AtMSBc
AT5G42650	2850.52	-1.07317	0.147877	-7.25718	3.95248e-13	2.2739e-10	2044	1343	4169	4412	1726.61	1948.9	3988.34	3738.23	100	UP_AtMSCtrl_DOWN_AtMSBc
AT3G16530	2021.8	-1.08393	0.151511	-7.15413	8.42028e-13	4.6828e-10	1478	927	2747	3382	1248.5	1345.22	2627.96	2865.52	100	UP_AtMSCtrl_DOWN_AtMSBc
AT4G23670	1923.39	-1.07665	0.151091	-7.12583	1.03459e-12	5.56807e-10	1394	895	2708	3100	1177.54	1298.78	2590.65	2626.59	100	UP_AtMSCtrl_DOWN_AtMSBc
AT2G25450	5192.2	-0.963208	0.136653	-7.04858	1.80755e-12	9.42409e-10	4227	2391	7443	7799	3570.63	3469.7	7120.47	6607.99	100	UP_AtMSCtrl_DOWN_AtMSBc
AT5G61160	2464.19	-1.40529	0.199583	-7.04116	1.90648e-12	9.63869e-10	1232	1148	3880	4058	1040.7	1665.92	3711.87	3438.29	100	UP_AtMSCtrl_DOWN_AtMSBc
AT3G16460	358.387	-1.58536	0.226176	-7.00938	2.39379e-12	1.17465e-09	219	119	587	607	184.994	172.687	561.563	514.303	100	UP_AtMSCtrl_DOWN_AtMSBc
AT5G41750	438.515	-1.54629	0.222476	-6.95035	3.64374e-12	1.73692e-09	300	132	682	775	253.416	191.552	652.446	656.647	100	UP_AtMSCtrl_DOWN_AtMSBc
AT3G15356	3834.59	-1.17725	0.169946	-6.92719	4.29289e-12	1.98952e-09	2389	1853	5961	5817	2018.04	2688.98	5702.69	4928.67	100	UP_AtMSCtrl_DOWN_AtMSBc
AT3G16400	310.715	-1.6782	0.243623	-6.88853	5.63714e-12	2.54189e-09	189	93	528	523	159.652	134.957	505.12	443.131	100	UP_AtMSCtrl_DOWN_AtMSBc
AT1G32640	1385.86	-1.36511	0.200158	-6.82017	9.09336e-12	3.89009e-09	869	563	2494	1896	734.062	816.998	2385.93	1606.46	100	UP_AtMSCtrl_DOWN_AtMSBc
AT1G64660	3001.92	-1.03248	0.151324	-6.82301	8.91528e-12	3.89009e-09	2400	1319	4556	4376	2027.33	1914.07	4358.57	3707.73	100	UP_AtMSCtrl_DOWN_AtMSBc
AT5G02940	1142.89	-1.28897	0.189279	-6.80991	9.76568e-12	4.07326e-09	689	516	1525	2103	582.013	748.794	1458.92	1781.84	100	UP_AtMSCtrl_DOWN_AtMSBc
AT3G55970	134.642	-2.78708	0.414861	-6.71811	1.84101e-11	7.49158e-09	22	36	256	263	18.5839	52.2415	244.907	222.836	100	UP_AtMSCtrl_DOWN_AtMSBc
AT4G23180	650.507	-1.29126	0.193285	-6.68061	2.37958e-11	9.23275e-09	413	281	914	1146	348.87	407.774	874.393	970.991	100	UP_AtMSCtrl_DOWN_AtMSBc
AT4G34150	764.174	-1.29704	0.194147	-6.68072	2.37777e-11	9.23275e-09	459	344	1184	1224	387.727	499.196	1132.69	1037.08	100	UP_AtMSCtrl_DOWN_AtMSBc
AT1G20510	662.796	-1.26699	0.190624	-6.64651	3.00131e-11	1.13135e-08	427	289	940	1147	360.696	419.383	899.266	971.838	100	UP_AtMSCtrl_DOWN_AtMSBc
AT4G29780	368.841	-1.55601	0.234195	-6.64407	3.05146e-11	1.13135e-08	201	142	625	592	169.789	206.064	597.916	501.594	100	UP_AtMSCtrl_DOWN_AtMSBc
AT5G20630	3536.05	-0.916131	0.139126	-6.58492	4.55138e-11	1.65077e-08	2834	1727	4921	5354	2393.94	2506.14	4707.75	4536.37	100	UP_AtMSCtrl_DOWN_AtMSBc
AT1G72520	145.046	-2.21296	0.3385	-6.53754	6.25393e-11	2.22001e-08	66	32	280	248	55.7516	46.4369	267.867	210.127	100	UP_AtMSCtrl_DOWN_AtMSBc
AT1G64710	830.294	-1.20147	0.183892	-6.53357	6.42195e-11	2.23216e-08	556	371	1294	1269	469.665	538.377	1237.93	1075.21	100	UP_AtMSCtrl_DOWN_AtMSBc
AT3G27690	969.629	-1.15987	0.180105	-6.43997	1.19497e-10	3.98756e-08	672	436	1525	1439	567.652	632.702	1458.92	1219.25	100	UP_AtMSCtrl_DOWN_AtMSBc
AT5G47240	469.827	-1.40328	0.217902	-6.43996	1.19503e-10	3.98756e-08	300	181	627	901	253.416	262.658	599.83	763.405	100	UP_AtMSCtrl_DOWN_AtMSBc
AT5G27420	451.169	-1.41692	0.220819	-6.41666	1.39293e-10	4.55678e-08	327	147	652	816	276.224	213.319	623.746	691.386	100	UP_AtMSCtrl_DOWN_AtMSBc
AT3G09260	51.3816	-4.59274	0.720933	-6.37054	1.8836e-10	6.04346e-08	7	1	123	95	5.91305	1.45115	117.67	80.4923	100	UP_AtMSCtrl_DOWN_AtMSBc
AT2G15042	595.986	-1.38931	0.21958	-6.32712	2.49777e-10	7.73184e-08	442	195	790	1147	373.367	282.975	755.766	971.838	100	UP_AtMSCtrl_DOWN_AtMSBc
AT4G08850	1499.77	-1.09481	0.173042	-6.32683	2.50251e-10	7.73184e-08	1004	736	2253	2275	848.1	1068.05	2155.37	1927.58	100	UP_AtMSCtrl_DOWN_AtMSBc
AT5G50950	1501.44	-1.10276	0.176202	-6.25852	3.88658e-10	1.17898e-07	995	738	1993	2582	840.497	1070.95	1906.64	2187.69	100	UP_AtMSCtrl_DOWN_AtMSBc
AT4G33050	1608.39	-1.09182	0.174654	-6.25129	4.07065e-10	1.21276e-07	1373	614	2399	2464	1159.8	891.007	2295.04	2087.71	100	UP_AtMSCtrl_DOWN_AtMSBc
AT4G16260	1400.2	-1.37503	0.220232	-6.24356	4.27725e-10	1.25196e-07	686	678	1953	2560	579.478	983.881	1868.37	2169.05	100	UP_AtMSCtrl_DOWN_AtMSBc
AT2G41990	647.421	1.15646	0.18618	6.21152	5.2473e-10	1.50941e-07	1068	610	441	449	902.162	885.203	421.89	380.432	100	DOWN_AtMSCtrl_UP_AtMSBc
AT5G05600	1093.74	-1.17731	0.191062	-6.16194	7.18586e-10	2.03202e-07	673	535	1675	1685	568.497	776.366	1602.42	1427.68	100	UP_AtMSCtrl_DOWN_AtMSBc
AT1G52890	116.019	-2.32233	0.379014	-6.12729	8.93912e-10	2.48567e-07	54	21	224	205	45.6149	30.4742	214.293	173.694	100	UP_AtMSCtrl_DOWN_AtMSBc
AT5G09440	5260.4	-0.824428	0.135223	-6.09682	1.08202e-09	2.95942e-07	4630	2537	7049	7914	3911.06	3681.57	6743.54	6705.43	100	UP_AtMSCtrl_DOWN_AtMSBc
AT4G08870	281.823	-1.67196	0.278783	-5.99733	2.00589e-09	5.39778e-07	145	102	358	607	122.485	148.017	342.487	514.303	100	UP_AtMSCtrl_DOWN_AtMSBc
AT5G19240	219.173	-1.82457	0.304558	-5.99086	2.08728e-09	5.52765e-07	143	48	379	382	120.795	69.6553	362.577	323.664	100	UP_AtMSCtrl_DOWN_AtMSBc
AT4G21910	617.464	-1.13247	0.189478	-5.9768	2.27564e-09	5.9323e-07	459	266	843	1050	387.727	386.006	806.47	889.651	100	UP_AtMSCtrl_DOWN_AtMSBc
AT4G29700	191.096	-1.87107	0.313374	-5.97071	2.36228e-09	6.06343e-07	104	52	375	286	87.851	75.4599	358.75	242.324	100	UP_AtMSCtrl_DOWN_AtMSBc
AT3G23550	1600.93	-0.991326	0.168667	-5.87742	4.1671e-09	1.05339e-06	1196	782	2008	2759	1010.29	1134.8	1920.99	2337.66	100	UP_AtMSCtrl_DOWN_AtMSBc
AT1G80160	382.167	-1.31869	0.224949	-5.86217	4.5687e-09	1.13768e-06	233	167	580	631	196.82	242.342	554.866	534.638	100	UP_AtMSCtrl_DOWN_AtMSBc
AT4G24570	403.565	-1.33982	0.230405	-5.81505	6.06148e-09	1.4872e-06	252	169	678	599	212.87	245.245	648.62	507.525	100	UP_AtMSCtrl_DOWN_AtMSBc
AT3G44630	1130.46	-0.956367	0.164797	-5.8033	6.50231e-09	1.57224e-06	892	541	1487	1842	753.491	785.073	1422.56	1560.7	100	UP_AtMSCtrl_DOWN_AtMSBc
AT3G59350	6231.69	0.782618	0.136137	5.74876	8.99014e-09	2.14274e-06	9766	5177	4806	5390	8249.54	7512.61	4597.74	4566.88	100	DOWN_AtMSCtrl_UP_AtMSBc
AT1G76160	2248.45	0.844392	0.147185	5.73696	9.639e-09	2.26503e-06	3486	1951	1750	1822	2944.7	2831.2	1674.17	1543.76	100	DOWN_AtMSCtrl_UP_AtMSBc
AT1G54020	42.9113	-5.31349	0.929042	-5.71933	1.06947e-08	2.47819e-06	3	1	123	59	2.53416	1.45115	117.67	49.9899	100	UP_AtMSCtrl_DOWN_AtMSBc
AT1G02640	934.714	0.977504	0.171731	5.69205	1.25522e-08	2.86878e-06	1385	903	669	730	1169.94	1310.39	640.01	618.519	100	DOWN_AtMSCtrl_UP_AtMSBc
AT1G72416	521.872	1.2003	0.212022	5.66121	1.50306e-08	3.3888e-06	821	525	287	422	693.516	761.855	274.563	357.555	100	DOWN_AtMSCtrl_UP_AtMSBc
AT1G67330	36.1546	8.76565	1.5504	5.65378	1.56955e-08	3.49151e-06	75	56	0	0	63.3541	81.2645	0	0	100	DOWN_AtMSCtrl_UP_AtMSBc
AT3G44300	114.752	-2.29047	0.405853	-5.64359	1.66543e-08	3.65605e-06	31	37	174	251	26.1863	53.6926	166.46	212.669	100	UP_AtMSCtrl_DOWN_AtMSBc
AT3G57530	1002.91	-1.01458	0.180055	-5.63481	1.75255e-08	3.79733e-06	698	511	1376	1610	589.615	741.539	1316.37	1364.13	100	UP_AtMSCtrl_DOWN_AtMSBc
AT1G25175	1821.21	-0.906787	0.161448	-5.61659	1.94768e-08	4.16605e-06	1361	956	2406	2887	1149.66	1387.3	2301.74	2446.12	100	UP_AtMSCtrl_DOWN_AtMSBc
AT1G19610	128.781	-1.94975	0.3484	-5.5963	2.18969e-08	4.6244e-06	68	33	191	268	57.441	47.888	182.723	227.073	100	UP_AtMSCtrl_DOWN_AtMSBc
AT3G08720	374.561	-1.29531	0.231819	-5.58761	2.30217e-08	4.80117e-06	291	128	565	621	245.814	185.747	540.516	526.165	100	UP_AtMSCtrl_DOWN_AtMSBc
AT3G44860	57.2117	-3.07096	0.550996	-5.57347	2.49714e-08	5.14349e-06	19	5	113	115	16.0497	7.25576	108.103	97.438	100	UP_AtMSCtrl_DOWN_AtMSBc
AT1G03220	694.997	-1.13118	0.203222	-5.56623	2.6031e-08	5.27289e-06	452	339	1083	1027	381.814	491.94	1036.07	870.164	100	UP_AtMSCtrl_DOWN_AtMSBc
AT1G80840	482.185	-1.14968	0.206596	-5.56489	2.62317e-08	5.27289e-06	328	223	716	759	277.068	323.607	684.973	643.091	100	UP_AtMSCtrl_DOWN_AtMSBc
AT5G51550	3905.47	0.947983	0.171764	5.5191	3.40749e-08	6.76793e-06	5440	3924	3140	2748	4595.28	5694.32	3003.93	2328.34	100	DOWN_AtMSCtrl_UP_AtMSBc
AT1G76930	483.876	-1.17045	0.212471	-5.50877	3.61346e-08	7.09259e-06	317	227	740	744	267.776	329.411	707.933	630.381	100	UP_AtMSCtrl_DOWN_AtMSBc
AT5G57560	2828.22	0.8605	0.15641	5.50155	3.76466e-08	7.30344e-06	3905	2755	2186	2272	3298.63	3997.92	2091.27	1925.04	100	DOWN_AtMSCtrl_UP_AtMSBc
AT2G06050	552.074	-1.12896	0.205639	-5.48999	4.01951e-08	7.70821e-06	429	227	874	803	362.385	329.411	836.126	680.371	100	UP_AtMSCtrl_DOWN_AtMSBc
AT1G13210	1754.8	-0.843126	0.15368	-5.48623	4.10601e-08	7.78462e-06	1518	847	2473	2528	1282.29	1229.13	2365.84	2141.94	100	UP_AtMSCtrl_DOWN_AtMSBc
AT1G25055	678.648	1.03653	0.190541	5.43992	5.33056e-08	9.99271e-06	997	678	439	553	842.187	983.881	419.976	468.55	100	DOWN_AtMSCtrl_UP_AtMSBc
AT5G25930	190.813	-1.6766	0.309085	-5.42441	5.81447e-08	1.07787e-05	121	54	354	288	102.211	78.3622	338.66	244.019	100	UP_AtMSCtrl_DOWN_AtMSBc
AT1G24170	746.728	0.997275	0.184291	5.4114	6.25335e-08	1.14649e-05	1182	683	566	538	998.46	991.137	541.473	455.84	100	DOWN_AtMSCtrl_UP_AtMSBc
AT1G15125	25236.2	-1.01173	0.187621	-5.39241	6.95188e-08	1.26071e-05	16242	13610	40289	34146	13720	19750.2	38543.1	28931.5	100	UP_AtMSCtrl_DOWN_AtMSBc
AT4G16563	666.24	1.00565	0.187	5.37777	7.54133e-08	1.3529e-05	1017	634	492	490	859.081	920.03	470.68	415.171	100	DOWN_AtMSCtrl_UP_AtMSBc
AT1G62300	323.922	-1.33553	0.248844	-5.36693	8.00871e-08	1.42146e-05	209	132	556	467	176.547	191.552	531.906	395.683	100	UP_AtMSCtrl_DOWN_AtMSBc
AT5G24420	108.967	-1.9932	0.372316	-5.35351	8.6266e-08	1.51501e-05	58	26	171	219	48.9938	37.7299	163.59	185.556	100	UP_AtMSCtrl_DOWN_AtMSBc
AT5G55930	1182.1	1.01005	0.188894	5.34714	8.93536e-08	1.55289e-05	1937	1049	952	778	1636.22	1522.26	910.746	659.189	100	DOWN_AtMSCtrl_UP_AtMSBc
AT2G44490	3334.31	-0.738829	0.1384	-5.33837	9.37875e-08	1.61314e-05	2973	1713	4394	4882	2511.35	2485.82	4203.59	4136.45	100	UP_AtMSCtrl_DOWN_AtMSBc
AT4G34260	781.528	1.04334	0.19563	5.33321	9.64913e-08	1.64271e-05	1232	733	611	516	1040.7	1063.69	584.523	437.2	100	DOWN_AtMSCtrl_UP_AtMSBc
AT1G04430	2083.51	0.87324	0.163828	5.33023	9.80905e-08	1.65261e-05	3521	1664	1618	1649	2974.26	2414.72	1547.89	1397.18	100	DOWN_AtMSCtrl_UP_AtMSBc
AT1G17420	233.005	-1.45723	0.273481	-5.32845	9.90538e-08	1.65261e-05	153	82	403	352	129.242	118.994	385.536	298.245	100	UP_AtMSCtrl_DOWN_AtMSBc
AT1G14250	186.564	-1.92869	0.362746	-5.31692	1.05537e-07	1.74335e-05	55	77	287	370	46.4596	111.739	274.563	313.496	100	UP_AtMSCtrl_DOWN_AtMSBc
AT1G24070	45.3187	-3.38682	0.637309	-5.31425	1.071e-07	1.75181e-05	6	8	95	87	5.06832	11.6092	90.8833	73.714	100	UP_AtMSCtrl_DOWN_AtMSBc
AT1G30280	428.588	1.25338	0.236933	5.29002	1.22305e-07	1.9811e-05	841	342	249	318	710.41	496.294	238.21	269.437	100	DOWN_AtMSCtrl_UP_AtMSBc
AT4G01080	70.9651	-2.59316	0.490784	-5.2837	1.26598e-07	2.03093e-05	28	11	157	111	23.6522	15.9627	150.197	94.0488	100	UP_AtMSCtrl_DOWN_AtMSBc
AT4G28190	366.297	1.22252	0.231693	5.27645	1.31712e-07	2.09284e-05	669	317	212	280	565.118	460.015	202.813	237.24	100	DOWN_AtMSCtrl_UP_AtMSBc
AT4G23190	150.129	-1.66155	0.315057	-5.27382	1.33612e-07	2.10301e-05	91	46	242	266	76.8696	66.753	231.513	225.378	100	UP_AtMSCtrl_DOWN_AtMSBc
AT1G57990	1535.52	-0.888883	0.168881	-5.26336	1.41446e-07	2.20551e-05	1136	825	2150	2276	959.603	1197.2	2056.83	1928.42	100	UP_AtMSCtrl_DOWN_AtMSBc
AT3G48140	10567.2	0.746106	0.142712	5.22806	1.71298e-07	2.64623e-05	17065	8313	8219	9356	14415.2	12063.4	7862.84	7927.22	100	DOWN_AtMSCtrl_UP_AtMSBc
AT1G14290	1837.55	0.784707	0.150951	5.19843	2.00974e-07	3.07619e-05	2748	1605	1475	1521	2321.29	2329.1	1411.08	1288.72	100	DOWN_AtMSCtrl_UP_AtMSBc
AT5G03630	2849.16	-0.865567	0.166708	-5.19211	2.07923e-07	3.15362e-05	2723	1195	3922	4261	2300.17	1734.13	3752.04	3610.29	100	UP_AtMSCtrl_DOWN_AtMSBc
AT5G39520	175.954	-1.69037	0.325873	-5.18719	2.13487e-07	3.20885e-05	124	41	293	306	104.745	59.4972	280.303	259.27	100	UP_AtMSCtrl_DOWN_AtMSBc
AT1G02920	653.908	-1.07943	0.20829	-5.18234	2.19121e-07	3.26413e-05	577	241	899	1084	487.404	349.728	860.043	918.459	100	UP_AtMSCtrl_DOWN_AtMSBc
AT2G24600	535.009	-1.10036	0.212514	-5.17782	2.24489e-07	3.3145e-05	404	234	660	977	341.267	339.57	631.4	827.799	100	UP_AtMSCtrl_DOWN_AtMSBc
AT1G68600	223.681	-1.5565	0.300858	-5.17353	2.29708e-07	3.36179e-05	100	100	341	400	84.4721	145.115	326.223	338.915	100	UP_AtMSCtrl_DOWN_AtMSBc
AT2G26010	367.785	-3.11679	0.603423	-5.16518	2.40211e-07	3.48494e-05	127	30	653	821	107.28	43.5346	624.703	695.623	100	UP_AtMSCtrl_DOWN_AtMSBc
AT1G13245	1968.57	0.822749	0.159584	5.1556	2.52817e-07	3.6362e-05	3261	1567	1492	1674	2754.63	2273.95	1427.35	1418.36	100	DOWN_AtMSCtrl_UP_AtMSBc
AT1G23030	462.635	1.04194	0.202205	5.15288	2.56515e-07	3.65786e-05	719	440	315	358	607.354	638.507	301.35	303.329	100	DOWN_AtMSCtrl_UP_AtMSBc
AT3G14620	453.92	-1.24823	0.244249	-5.11046	3.21383e-07	4.54403e-05	384	145	734	683	324.373	210.417	702.193	578.697	100	UP_AtMSCtrl_DOWN_AtMSBc
AT3G30775	24247.3	0.673532	0.132076	5.09959	3.40387e-07	4.77229e-05	34436	21035	20443	21030	29088.8	30525	19557.1	17818.4	100	DOWN_AtMSCtrl_UP_AtMSBc
AT1G62480	12081	0.799525	0.156899	5.0958	3.47265e-07	4.82814e-05	15868	11914	9713	9842	13404	17289	9292.1	8339	100	DOWN_AtMSCtrl_UP_AtMSBc
AT5G44070	887.207	-0.875721	0.172491	-5.07691	3.83624e-07	5.28957e-05	740	432	1145	1418	625.093	626.898	1095.38	1201.45	99.99	UP_AtMSCtrl_DOWN_AtMSBc
AT5G64190	377.519	-1.13582	0.224985	-5.04843	4.4545e-07	6.09172e-05	308	145	541	616	260.174	210.417	517.556	521.929	99.99	UP_AtMSCtrl_DOWN_AtMSBc
AT1G27130	1533.8	-0.805615	0.159999	-5.03513	4.77512e-07	6.47709e-05	1230	824	2095	2238	1039.01	1195.75	2004.22	1896.23	99.99	UP_AtMSCtrl_DOWN_AtMSBc
AT2G02930	377.812	-1.19088	0.237163	-5.02135	5.13103e-07	6.79414e-05	317	131	544	629	267.776	190.101	520.426	532.943	99.99	UP_AtMSCtrl_DOWN_AtMSBc
AT3G56880	679.226	-0.951794	0.189482	-5.02315	5.08318e-07	6.79414e-05	561	311	1012	972	473.888	451.308	968.146	823.563	99.99	UP_AtMSCtrl_DOWN_AtMSBc
AT5G64740	3499.02	0.700129	0.13941	5.02207	5.11183e-07	6.79414e-05	5121	2989	2881	3041	4325.82	4337.49	2756.16	2576.6	99.99	DOWN_AtMSCtrl_UP_AtMSBc
AT5G64572	444.203	-1.31556	0.262557	-5.01057	5.4268e-07	7.12919e-05	333	156	828	563	281.292	226.38	792.12	477.023	99.99	UP_AtMSCtrl_DOWN_AtMSBc
AT4G15530	4106.48	-0.725222	0.144821	-5.00771	5.50804e-07	7.17938e-05	3475	2245	5066	6357	2935.4	3257.84	4846.47	5386.2	99.99	UP_AtMSCtrl_DOWN_AtMSBc
AT1G75750	34459.4	0.758175	0.152141	4.98336	6.24903e-07	8.08207e-05	57654	26130	25893	31213	48701.5	37918.6	24771	26446.4	99.99	DOWN_AtMSCtrl_UP_AtMSBc
AT1G76090	1720.97	0.752363	0.15115	4.9776	6.43788e-07	8.26228e-05	2581	1474	1386	1462	2180.22	2139	1325.94	1238.73	99.99	DOWN_AtMSCtrl_UP_AtMSBc
AT4G27860	111.592	-1.76482	0.358124	-4.92796	8.30919e-07	0.000105825	57	37	183	200	48.1491	53.6926	175.07	169.457	99.99	UP_AtMSCtrl_DOWN_AtMSBc
AT2G35930	498.084	-1.39541	0.28433	-4.90772	9.21396e-07	0.000116459	229	247	907	676	193.441	358.434	867.696	572.766	99.99	UP_AtMSCtrl_DOWN_AtMSBc
AT1G15550	76.7942	2.27742	0.465121	4.89641	9.76055e-07	0.00012139	106	114	28	30	89.5404	165.431	26.7867	25.4186	99.99	DOWN_AtMSCtrl_UP_AtMSBc
AT4G23810	550.631	-1.16728	0.238329	-4.89777	9.69291e-07	0.00012139	490	180	873	817	413.913	261.207	835.17	692.233	99.99	UP_AtMSCtrl_DOWN_AtMSBc
AT5G53970	468.306	-1.05898	0.216331	-4.89516	9.82237e-07	0.00012139	404	182	638	776	341.267	264.11	610.353	657.495	99.99	UP_AtMSCtrl_DOWN_AtMSBc
AT2G15390	423.278	-1.10586	0.22642	-4.88412	1.0389e-06	0.000127449	365	156	598	692	308.323	226.38	572.086	586.323	99.99	UP_AtMSCtrl_DOWN_AtMSBc
AT2G42580	4520.28	0.690162	0.141548	4.87583	1.0835e-06	0.000131322	6501	3908	3838	3832	5491.53	5671.1	3671.69	3246.8	99.99	DOWN_AtMSCtrl_UP_AtMSBc
AT4G13495	1724.76	-0.981146	0.201247	-4.87534	1.08622e-06	0.000131322	1266	863	1900	3257	1069.42	1252.34	1817.67	2759.61	99.99	UP_AtMSCtrl_DOWN_AtMSBc
AT5G18840	48.6308	2.73348	0.561154	4.87117	1.10937e-06	0.000133156	80	70	15	13	67.5777	101.581	14.35	11.0147	99.99	DOWN_AtMSCtrl_UP_AtMSBc
AT1G73480	472.599	-0.978614	0.201644	-4.85319	1.21492e-06	0.000144784	369	224	663	731	311.702	325.058	634.27	619.367	99.99	UP_AtMSCtrl_DOWN_AtMSBc
AT1G31350	859.414	0.871243	0.179654	4.84956	1.23734e-06	0.00014641	1220	822	667	680	1030.56	1192.85	638.096	576.155	99.99	DOWN_AtMSCtrl_UP_AtMSBc
AT1G72900	623.514	-0.911385	0.188197	-4.84271	1.28081e-06	0.000150486	490	312	873	935	413.913	452.759	835.17	792.213	99.98	UP_AtMSCtrl_DOWN_AtMSBc
AT1G68620	48.1725	-2.77319	0.575342	-4.82007	1.43509e-06	0.000167434	18	6	79	110	15.205	8.70691	75.5766	93.2016	99.98	UP_AtMSCtrl_DOWN_AtMSBc
AT1G19180	733.873	-1.06506	0.222152	-4.79429	1.6325e-06	0.000189144	436	403	1051	1153	368.298	584.814	1005.46	976.922	99.98	UP_AtMSCtrl_DOWN_AtMSBc
AT5G35735	743.889	-0.965835	0.201684	-4.78885	1.6774e-06	0.000193006	509	400	1087	1092	429.963	580.461	1039.9	925.237	99.98	UP_AtMSCtrl_DOWN_AtMSBc
AT5G42050	3230.65	-0.742018	0.155102	-4.78407	1.71779e-06	0.000196299	2877	1657	4667	4276	2430.26	2404.56	4464.76	3623	99.98	UP_AtMSCtrl_DOWN_AtMSBc
AT2G34810	248.684	-1.3935	0.292581	-4.76277	1.90954e-06	0.000216727	120	121	373	426	101.366	175.589	356.837	360.944	99.98	UP_AtMSCtrl_DOWN_AtMSBc
AT3G60320	4852.14	0.726085	0.152507	4.76101	1.92626e-06	0.000217147	6758	4402	4182	3908	5708.62	6387.97	4000.78	3311.2	99.98	DOWN_AtMSCtrl_UP_AtMSBc
AT5G38210	353.433	-1.07996	0.226973	-4.75808	1.95444e-06	0.000218845	247	170	489	579	208.646	246.696	467.81	490.579	99.98	UP_AtMSCtrl_DOWN_AtMSBc
AT1G12240	3537.28	-0.650509	0.137937	-4.71599	2.40543e-06	0.000267548	3273	1889	4446	5181	2764.77	2741.23	4253.34	4389.79	99.97	UP_AtMSCtrl_DOWN_AtMSBc
AT3G15353	8749.25	0.637988	0.135513	4.70793	2.50241e-06	0.000276491	11936	7735	7089	8153	10082.6	11224.7	6781.81	6907.93	99.97	DOWN_AtMSCtrl_UP_AtMSBc
AT1G70820	667.8	-1.02025	0.216864	-4.70457	2.54402e-06	0.000277415	423	364	887	1106	357.317	528.219	848.563	937.099	99.97	UP_AtMSCtrl_DOWN_AtMSBc
AT3G45640	3595.82	-0.798944	0.169787	-4.70557	2.53158e-06	0.000277415	2636	2086	4973	5160	2226.68	3027.1	4757.5	4372	99.97	UP_AtMSCtrl_DOWN_AtMSBc
AT1G02930	799.146	-0.964358	0.206279	-4.67502	2.93927e-06	0.000318433	756	304	1064	1297	638.609	441.15	1017.89	1098.93	99.97	UP_AtMSCtrl_DOWN_AtMSBc
AT5G01810	3064.94	0.773811	0.165715	4.66954	3.01869e-06	0.000324928	4110	2939	2589	2415	3471.8	4264.94	2476.81	2046.2	99.97	DOWN_AtMSCtrl_UP_AtMSBc
AT3G55980	1568.21	-0.76973	0.165217	-4.6589	3.17903e-06	0.000339993	1426	767	2255	2122	1204.57	1113.03	2157.28	1797.94	99.97	UP_AtMSCtrl_DOWN_AtMSBc
AT5G14820	17.1541	7.69406	1.65303	4.65452	3.24736e-06	0.000345089	40	24	0	0	33.7888	34.8276	0	0	99.97	DOWN_AtMSCtrl_UP_AtMSBc
AT2G39250	49.978	-2.61042	0.561223	-4.65131	3.29832e-06	0.000346095	12	13	83	108	10.1366	18.865	79.4033	91.507	99.97	UP_AtMSCtrl_DOWN_AtMSBc
AT3G51450	82.9731	-1.95322	0.419913	-4.6515	3.29536e-06	0.000346095	38	25	155	136	32.0994	36.2788	148.283	115.231	99.97	UP_AtMSCtrl_DOWN_AtMSBc
AT3G13710	17.0621	7.68936	1.65464	4.64715	3.36556e-06	0.000350944	43	22	0	0	36.323	31.9253	0	0	99.96	DOWN_AtMSCtrl_UP_AtMSBc
AT4G02410	307.743	-1.1984	0.258526	-4.6355	3.56078e-06	0.000368994	190	148	503	442	160.497	214.77	481.203	374.501	99.96	UP_AtMSCtrl_DOWN_AtMSBc
AT5G05170	5628.56	0.631643	0.137003	4.61042	4.01858e-06	0.000413864	8459	4504	4700	5118	7145.49	6535.99	4496.33	4336.41	99.96	DOWN_AtMSCtrl_UP_AtMSBc
AT5G07100	1653.21	-0.880071	0.191185	-4.60325	4.15958e-06	0.000425757	1178	921	1959	2841	995.081	1336.51	1874.11	2407.14	99.96	UP_AtMSCtrl_DOWN_AtMSBc
AT1G45201	403.487	-1.11591	0.244319	-4.56746	4.93678e-06	0.000502227	249	208	514	720	210.335	301.84	491.726	610.047	99.95	UP_AtMSCtrl_DOWN_AtMSBc
AT2G34770	2643.87	0.680045	0.149065	4.56207	5.06529e-06	0.000511935	3625	2378	2043	2488	3062.11	3450.84	1954.47	2108.05	99.95	DOWN_AtMSCtrl_UP_AtMSBc
AT3G19850	1354.71	0.757156	0.16601	4.5609	5.09358e-06	0.000511935	2192	1069	1071	1170	1851.63	1551.28	1024.59	991.326	99.95	DOWN_AtMSCtrl_UP_AtMSBc
AT2G15970	2072.44	-0.734224	0.161073	-4.55834	5.15605e-06	0.000515111	1861	1061	2985	2741	1572.03	1539.67	2855.65	2322.41	99.95	UP_AtMSCtrl_DOWN_AtMSBc
AT4G32410	7264.03	0.62023	0.136199	4.55386	5.26705e-06	0.000523068	9881	6380	6050	6684	8346.69	9258.35	5787.83	5663.27	99.95	DOWN_AtMSCtrl_UP_AtMSBc
AT1G52030	82.5148	-1.9439	0.428098	-4.54078	5.6046e-06	0.000553297	32	29	147	142	27.0311	42.0834	140.63	120.315	99.94	UP_AtMSCtrl_DOWN_AtMSBc
AT1G19570	2931.62	-0.686463	0.151424	-4.53338	5.80476e-06	0.000569686	2429	1685	3753	4295	2051.83	2445.19	3590.37	3639.1	99.94	UP_AtMSCtrl_DOWN_AtMSBc
AT2G43550	219.268	-1.26309	0.27882	-4.53013	5.8947e-06	0.00057513	132	102	301	389	111.503	148.017	287.957	329.595	99.94	UP_AtMSCtrl_DOWN_AtMSBc
AT5G52882	1518.75	0.730182	0.161291	4.5271	5.97991e-06	0.000580052	2073	1406	1225	1312	1751.11	2040.32	1171.92	1111.64	99.94	DOWN_AtMSCtrl_UP_AtMSBc
AT1G28370	61.4096	-2.29086	0.506875	-4.51958	6.19613e-06	0.000594116	31	10	123	103	26.1863	14.5115	117.67	87.2705	99.94	UP_AtMSCtrl_DOWN_AtMSBc
AT3G52400	544.913	-1.01296	0.224121	-4.51969	6.19305e-06	0.000594116	501	204	826	791	423.205	296.035	790.206	670.204	99.94	UP_AtMSCtrl_DOWN_AtMSBc
AT5G06530	1058.51	0.898479	0.19922	4.50999	6.483e-06	0.000618071	1522	1014	636	1025	1285.67	1471.47	608.44	868.469	99.94	DOWN_AtMSCtrl_UP_AtMSBc
AT3G49120	962.008	-0.752795	0.167198	-4.50242	6.7184e-06	0.000636874	833	503	1283	1401	703.652	729.929	1227.4	1187.05	99.94	UP_AtMSCtrl_DOWN_AtMSBc
AT3G60290	345.356	1.10416	0.245862	4.49096	7.09013e-06	0.00066456	537	337	270	213	453.615	489.038	258.3	180.472	99.93	DOWN_AtMSCtrl_UP_AtMSBc
AT5G59890	885.691	0.856271	0.190624	4.49194	7.05758e-06	0.00066456	1503	697	605	806	1269.62	1011.45	578.783	682.913	99.93	DOWN_AtMSCtrl_UP_AtMSBc
AT1G74670	2027.66	0.716499	0.159963	4.47917	7.49342e-06	0.000698437	3236	1590	1519	1908	2733.52	2307.33	1453.18	1616.62	99.93	DOWN_AtMSCtrl_UP_AtMSBc
AT3G04720	6968.8	-0.60256	0.134594	-4.47686	7.57472e-06	0.000702092	6585	3794	9143	9513	5562.49	5505.67	8746.8	8060.24	99.93	UP_AtMSCtrl_DOWN_AtMSBc
AT2G31010	468.527	0.924293	0.207649	4.45122	8.53832e-06	0.000781355	669	457	327	393	565.118	663.176	312.83	332.984	99.92	DOWN_AtMSCtrl_UP_AtMSBc
AT4G27260	515.414	-0.905462	0.203456	-4.45042	8.57037e-06	0.000781355	386	271	707	786	326.062	393.262	676.363	665.967	99.92	UP_AtMSCtrl_DOWN_AtMSBc
AT5G41740	312.172	-1.14292	0.256773	-4.45109	8.54352e-06	0.000781355	261	115	508	443	220.472	166.882	485.986	375.348	99.92	UP_AtMSCtrl_DOWN_AtMSBc
AT4G18205	2019.94	-0.77071	0.173481	-4.44261	8.88752e-06	0.000805867	1564	1149	2904	2730	1321.14	1667.37	2778.16	2313.09	99.92	UP_AtMSCtrl_DOWN_AtMSBc
AT1G72610	29358.7	0.677955	0.15285	4.43541	9.18953e-06	0.000828746	37461	27994	24540	25600	31644.1	40623.5	23476.6	21690.5	99.92	DOWN_AtMSCtrl_UP_AtMSBc
AT3G55130	656.629	-0.83886	0.18918	-4.43419	9.24203e-06	0.000829001	568	318	945	922	479.801	461.466	904.05	781.198	99.92	UP_AtMSCtrl_DOWN_AtMSBc
AT3G28740	88.8844	-1.83959	0.41611	-4.42093	9.82758e-06	0.00087681	35	34	151	156	29.5652	49.3392	144.457	132.177	99.91	UP_AtMSCtrl_DOWN_AtMSBc
AT1G20840	4828.4	0.658777	0.149057	4.41963	9.88704e-06	0.000877422	6685	4257	4252	4038	5646.96	6177.55	4067.74	3421.34	99.91	DOWN_AtMSCtrl_UP_AtMSBc
AT3G01970	251.731	-1.16659	0.264116	-4.41697	1.00092e-05	0.000883564	209	91	381	394	176.547	132.055	364.49	333.831	99.91	UP_AtMSCtrl_DOWN_AtMSBc
AT1G17380	72.1936	-1.95987	0.444155	-4.41259	1.02139e-05	0.000896892	31	23	128	126	26.1863	33.3765	122.453	106.758	99.91	UP_AtMSCtrl_DOWN_AtMSBc
AT5G06320	1220.15	-0.816014	0.18608	-4.38528	1.15837e-05	0.00101185	956	663	1833	1602	807.553	962.114	1753.57	1357.35	99.9	UP_AtMSCtrl_DOWN_AtMSBc
AT5G36220	460.059	-0.900916	0.205552	-4.38292	1.17102e-05	0.00101756	359	234	637	694	303.255	339.57	609.396	588.017	99.9	UP_AtMSCtrl_DOWN_AtMSBc
AT4G15440	279.31	-1.05793	0.241786	-4.37548	1.21164e-05	0.00104518	224	119	391	450	189.217	172.687	374.056	381.279	99.9	UP_AtMSCtrl_DOWN_AtMSBc
AT5G54960	2051.83	-0.663232	0.151602	-4.37482	1.21533e-05	0.00104518	1812	1135	2759	2821	1530.63	1647.06	2639.44	2390.2	99.9	UP_AtMSCtrl_DOWN_AtMSBc
AT4G36670	1015.57	-0.746745	0.170782	-4.37249	1.22837e-05	0.00105098	841	557	1286	1550	710.41	808.292	1230.27	1313.29	99.89	UP_AtMSCtrl_DOWN_AtMSBc
AT4G26530	6023.19	-0.639225	0.146268	-4.37024	1.2411e-05	0.00105173	5809	3109	8296	7952	4906.98	4511.63	7936.5	6737.63	99.89	UP_AtMSCtrl_DOWN_AtMSBc
AT4G35100	11058.3	0.625113	0.143043	4.37011	1.24186e-05	0.00105173	14729	9919	9589	9706	12441.9	14394	9173.47	8223.77	99.89	DOWN_AtMSCtrl_UP_AtMSBc
AT2G38540	5888.73	-0.639163	0.146889	-4.35133	1.35312e-05	0.00112877	5742	3003	8076	7814	4850.39	4357.81	7726.04	6620.7	99.89	UP_AtMSCtrl_DOWN_AtMSBc
AT4G01870	630.51	-0.96715	0.222209	-4.35244	1.34629e-05	0.00112877	406	354	926	920	342.957	513.708	885.873	779.504	99.89	UP_AtMSCtrl_DOWN_AtMSBc
AT4G22305	135.622	1.44839	0.332827	4.35179	1.35029e-05	0.00112877	253	126	87	74	213.714	182.845	83.23	62.6992	99.89	DOWN_AtMSCtrl_UP_AtMSBc
AT1G78040	5742.39	0.664872	0.153059	4.34388	1.39985e-05	0.00116195	9209	4344	4868	4992	7779.03	6303.8	4657.05	4229.66	99.88	DOWN_AtMSCtrl_UP_AtMSBc
AT2G42870	362.878	1.04327	0.240395	4.33982	1.42602e-05	0.00117781	671	282	257	271	566.808	409.225	245.863	229.615	99.88	DOWN_AtMSCtrl_UP_AtMSBc
AT4G36648	1629.88	-0.797343	0.18404	-4.33245	1.47462e-05	0.00121195	1345	859	1816	2832	1136.15	1246.54	1737.31	2399.52	99.88	UP_AtMSCtrl_DOWN_AtMSBc
AT4G23250	111.405	-1.57996	0.365701	-4.32037	1.5577e-05	0.00127396	70	36	151	224	59.1305	52.2415	144.457	189.792	99.87	UP_AtMSCtrl_DOWN_AtMSBc
AT4G28900	245.648	1.09201	0.253328	4.31066	1.62767e-05	0.00132468	378	241	171	177	319.304	349.728	163.59	149.97	99.87	DOWN_AtMSCtrl_UP_AtMSBc
AT2G26190	910.611	-0.737279	0.171529	-4.29827	1.72139e-05	0.00139416	849	446	1198	1336	717.168	647.214	1146.09	1131.98	99.86	UP_AtMSCtrl_DOWN_AtMSBc
AT5G12140	773.723	0.777379	0.181125	4.29196	1.77102e-05	0.00142743	1229	631	571	702	1038.16	915.677	546.256	594.795	99.86	DOWN_AtMSCtrl_UP_AtMSBc
AT3G62630	773.2	0.758866	0.177106	4.28481	1.82896e-05	0.00145307	1201	640	610	668	1014.51	928.737	583.566	565.988	99.85	DOWN_AtMSCtrl_UP_AtMSBc
AT5G13220	106.517	-1.5462	0.36083	-4.28513	1.8263e-05	0.00145307	65	37	168	185	54.9069	53.6926	160.72	156.748	99.85	UP_AtMSCtrl_DOWN_AtMSBc
AT5G19780	6616.1	0.604535	0.141048	4.28601	1.81908e-05	0.00145307	9798	5297	5839	5801	8276.57	7686.75	5585.97	4915.11	99.85	DOWN_AtMSCtrl_UP_AtMSBc
AT2G43590	131.675	-1.73049	0.404784	-4.27511	1.91045e-05	0.00151061	47	58	259	183	39.7019	84.1668	247.777	155.053	99.85	UP_AtMSCtrl_DOWN_AtMSBc
AT4G17870	1533.66	0.753602	0.176858	4.26106	2.03463e-05	0.00160121	2591	1144	1153	1396	2188.67	1660.12	1103.04	1182.81	99.84	DOWN_AtMSCtrl_UP_AtMSBc
AT2G15080	1976.55	-0.852843	0.20023	-4.25932	2.05053e-05	0.00160615	1300	1188	2521	3154	1098.14	1723.97	2411.76	2672.34	99.84	UP_AtMSCtrl_DOWN_AtMSBc
AT2G37130	1802.67	-0.860881	0.20254	-4.25042	2.13367e-05	0.00166347	1844	688	2615	2541	1557.67	998.392	2501.68	2152.96	99.83	UP_AtMSCtrl_DOWN_AtMSBc
AT4G27300	947.81	-0.779874	0.18362	-4.2472	2.16454e-05	0.00167969	894	440	1144	1538	755.18	638.507	1094.43	1303.13	99.83	UP_AtMSCtrl_DOWN_AtMSBc
AT4G22690	7793.49	-0.624878	0.147551	-4.23499	2.28565e-05	0.00176545	6825	4479	10699	10237	5765.22	6499.71	10235.4	8673.68	99.82	UP_AtMSCtrl_DOWN_AtMSBc
AT5G24150	54.1575	-2.19589	0.518722	-4.23327	2.30314e-05	0.00177077	25	12	79	121	21.118	17.4138	75.5766	102.522	99.82	UP_AtMSCtrl_DOWN_AtMSBc
AT3G54920	4946.07	0.58957	0.139673	4.22107	2.43143e-05	0.00186082	6731	4273	4285	4483	5685.82	6200.77	4099.31	3798.39	99.81	DOWN_AtMSCtrl_UP_AtMSBc
AT1G27770	775.018	-0.80554	0.191993	-4.19567	2.72069e-05	0.00207269	750	339	1065	1128	633.541	491.94	1018.85	955.74	99.79	UP_AtMSCtrl_DOWN_AtMSBc
AT4G02520	46366.2	-0.607961	0.145109	-4.18969	2.79336e-05	0.00211838	41173	26668	63968	59944	34779.7	38699.3	61196	50789.8	99.79	UP_AtMSCtrl_DOWN_AtMSBc
AT5G06870	1217.63	-0.93146	0.222396	-4.1883	2.81056e-05	0.00212178	756	717	1864	1662	638.609	1040.48	1783.23	1408.19	99.79	UP_AtMSCtrl_DOWN_AtMSBc
AT3G02040	1488.92	-0.654689	0.156401	-4.18597	2.83956e-05	0.00213402	1418	768	1968	2078	1197.81	1114.48	1882.72	1760.66	99.79	UP_AtMSCtrl_DOWN_AtMSBc
AT5G55120	347.941	-0.992715	0.237299	-4.1834	2.87182e-05	0.00214858	310	139	515	514	261.863	201.71	492.683	435.505	99.79	UP_AtMSCtrl_DOWN_AtMSBc
AT1G70090	690.793	0.798336	0.190979	4.18023	2.9122e-05	0.0021615	1139	545	544	578	962.137	790.878	520.426	489.732	99.78	DOWN_AtMSCtrl_UP_AtMSBc
AT4G26690	1514.36	0.693964	0.16602	4.18001	2.91499e-05	0.0021615	2011	1410	1258	1309	1698.73	2046.12	1203.49	1109.1	99.78	DOWN_AtMSCtrl_UP_AtMSBc
AT1G59870	15871.5	-0.626413	0.150135	-4.17232	3.01515e-05	0.00221607	13442	9376	21691	20978	11354.7	13606	20751	17774.4	99.78	UP_AtMSCtrl_DOWN_AtMSBc
AT5G58350	594.934	-0.789169	0.189106	-4.17316	3.00398e-05	0.00221607	496	313	783	894	418.982	454.211	749.07	757.474	99.78	UP_AtMSCtrl_DOWN_AtMSBc
AT2G17230	908.918	0.746779	0.179345	4.16393	3.12814e-05	0.00227813	1341	789	780	722	1132.77	1144.96	746.2	611.741	99.77	DOWN_AtMSCtrl_UP_AtMSBc
AT3G24420	525.698	0.875126	0.210214	4.16303	3.14055e-05	0.00227813	876	427	427	395	739.975	619.642	408.496	334.678	99.77	DOWN_AtMSCtrl_UP_AtMSBc
AT5G02380	4533.44	0.563239	0.135237	4.16482	3.11601e-05	0.00227813	6506	3665	3802	4346	5495.75	5318.47	3637.25	3682.31	99.77	DOWN_AtMSCtrl_UP_AtMSBc
AT1G79270	305.187	-1.00645	0.242222	-4.15508	3.25173e-05	0.00234857	230	146	468	433	194.286	211.868	447.72	366.875	99.77	UP_AtMSCtrl_DOWN_AtMSBc
AT4G11280	249.558	-1.04268	0.251689	-4.14273	3.43195e-05	0.00246805	189	115	339	410	159.652	166.882	324.31	347.388	99.75	UP_AtMSCtrl_DOWN_AtMSBc
AT5G03360	108.226	1.47089	0.355726	4.13489	3.55127e-05	0.00254289	181	114	56	72	152.894	165.431	53.5733	61.0047	99.75	DOWN_AtMSCtrl_UP_AtMSBc
AT2G04795	180.038	1.20702	0.292335	4.12888	3.64536e-05	0.00259911	264	193	110	132	223.006	280.072	105.233	111.842	99.74	DOWN_AtMSCtrl_UP_AtMSBc
AT3G26450	752.293	-0.775838	0.188082	-4.125	3.70733e-05	0.00263204	647	388	1092	1009	546.534	563.047	1044.68	854.912	99.74	UP_AtMSCtrl_DOWN_AtMSBc
AT5G66480	102.245	-1.63241	0.396783	-4.11411	3.88673e-05	0.00274772	75	24	169	176	63.3541	34.8276	161.677	149.122	99.73	UP_AtMSCtrl_DOWN_AtMSBc
AT2G05540	3728.23	-0.567719	0.138289	-4.10531	4.03765e-05	0.00284237	3585	2053	4783	5110	3028.32	2979.21	4575.73	4329.64	99.72	UP_AtMSCtrl_DOWN_AtMSBc
AT2G47160	587.129	0.912981	0.222714	4.09935	4.14313e-05	0.00290437	734	631	413	493	620.025	915.677	395.103	417.712	99.71	DOWN_AtMSCtrl_UP_AtMSBc
AT4G27730	156.762	1.26121	0.307887	4.09634	4.19737e-05	0.00293008	254	157	108	96	214.559	227.831	103.32	81.3395	99.71	DOWN_AtMSCtrl_UP_AtMSBc
AT4G15540	643.497	-0.873455	0.213285	-4.09524	4.21734e-05	0.00293176	570	294	729	1143	481.491	426.639	697.41	968.449	99.71	UP_AtMSCtrl_DOWN_AtMSBc
AT2G38310	2225.27	0.748529	0.182868	4.09327	4.25328e-05	0.00293379	2811	2210	1912	1759	2374.51	3207.05	1829.15	1490.38	99.71	DOWN_AtMSCtrl_UP_AtMSBc
AT4G30190	3240.09	0.575751	0.140662	4.09315	4.25544e-05	0.00293379	4428	2768	2742	3045	3740.42	4016.79	2623.18	2579.99	99.71	DOWN_AtMSCtrl_UP_AtMSBc
AT5G44130	2005.72	0.874095	0.213657	4.09111	4.29316e-05	0.00294762	2291	2245	1571	1566	1935.26	3257.84	1502.92	1326.85	99.71	DOWN_AtMSCtrl_UP_AtMSBc
AT3G02170	3064.49	0.647224	0.1584	4.08602	4.38837e-05	0.00300064	4186	2719	2751	2531	3536	3945.68	2631.79	2144.48	99.7	DOWN_AtMSCtrl_UP_AtMSBc
AT1G54010	37.0534	-2.55193	0.625378	-4.08062	4.49152e-05	0.00305863	12	8	64	77	10.1366	11.6092	61.2266	65.2411	99.69	UP_AtMSCtrl_DOWN_AtMSBc
AT3G15500	685.675	-0.758904	0.186573	-4.0676	4.74992e-05	0.00321737	616	343	964	947	520.348	497.745	922.226	802.381	99.68	UP_AtMSCtrl_DOWN_AtMSBc
AT4G11320	90.2805	-1.62335	0.399156	-4.06695	4.76319e-05	0.00321737	44	36	137	166	37.1677	52.2415	131.063	140.65	99.68	UP_AtMSCtrl_DOWN_AtMSBc
AT1G60260	413.009	-1.06815	0.262784	-4.06475	4.80848e-05	0.00323487	301	193	435	828	254.261	280.072	416.15	701.554	99.68	UP_AtMSCtrl_DOWN_AtMSBc
AT5G56850	511.709	-0.88053	0.216948	-4.05872	4.93417e-05	0.0033061	414	256	593	895	349.714	371.495	567.303	758.322	99.67	UP_AtMSCtrl_DOWN_AtMSBc
AT2G25430	4000.29	0.614091	0.152123	4.03681	5.4182e-05	0.00361589	5746	3324	3645	3348	4853.77	4823.63	3487.05	2836.72	99.64	DOWN_AtMSCtrl_UP_AtMSBc
AT1G21130	11320.8	-0.60491	0.150063	-4.03104	5.55309e-05	0.00366196	11826	5492	14670	15685	9989.67	7969.73	14034.3	13289.7	99.63	UP_AtMSCtrl_DOWN_AtMSBc
AT5G05440	1312.94	0.67558	0.167572	4.03159	5.54018e-05	0.00366196	2076	1016	1096	1151	1753.64	1474.37	1048.51	975.227	99.63	DOWN_AtMSCtrl_UP_AtMSBc
AT5G32481	97.3852	-1.58867	0.394094	-4.0312	5.54929e-05	0.00366196	69	26	166	159	58.2857	37.7299	158.807	134.719	99.63	UP_AtMSCtrl_DOWN_AtMSBc
AT5G11670	6140.23	-0.629569	0.156489	-4.02309	5.74406e-05	0.00377299	4983	3747	7679	8932	4209.24	5437.47	7346.24	7567.97	99.62	UP_AtMSCtrl_DOWN_AtMSBc
AT5G57220	158.811	-1.23379	0.307213	-4.01609	5.91718e-05	0.00387146	119	61	214	285	100.522	88.5203	204.727	241.477	99.61	UP_AtMSCtrl_DOWN_AtMSBc
AT1G72430	2635.96	0.629865	0.156909	4.01421	5.96464e-05	0.00387524	3415	2427	2222	2374	2884.72	3521.95	2125.71	2011.46	99.61	DOWN_AtMSCtrl_UP_AtMSBc
AT4G20860	298.901	-1.00492	0.250352	-4.01402	5.96942e-05	0.00387524	240	134	475	406	202.733	194.454	454.416	343.998	99.61	UP_AtMSCtrl_DOWN_AtMSBc
AT5G54710	333.331	-0.951763	0.237173	-4.01294	5.99669e-05	0.00387786	260	162	511	460	219.627	235.087	488.856	389.752	99.61	UP_AtMSCtrl_DOWN_AtMSBc
AT3G25500	1380.63	0.787837	0.196443	4.01051	6.05879e-05	0.00390289	1706	1418	1150	1090	1441.09	2057.73	1100.17	923.543	99.61	DOWN_AtMSCtrl_UP_AtMSBc
AT4G04620	478.834	-0.957588	0.238984	-4.00691	6.15189e-05	0.00393451	312	269	587	826	263.553	390.36	561.563	699.859	99.61	UP_AtMSCtrl_DOWN_AtMSBc
AT5G62930	977.187	0.68044	0.169822	4.00679	6.15505e-05	0.00393451	1456	811	741	936	1229.91	1176.88	708.89	793.06	99.61	DOWN_AtMSCtrl_UP_AtMSBc
AT2G26650	498.443	-0.791768	0.198039	-3.99804	6.38688e-05	0.00406713	428	254	677	727	361.54	368.593	647.663	615.978	99.59	UP_AtMSCtrl_DOWN_AtMSBc
AT2G36120	1375.02	0.741579	0.185556	3.99652	6.42818e-05	0.00407786	1708	1379	1075	1213	1442.78	2001.14	1028.42	1027.76	99.59	DOWN_AtMSCtrl_UP_AtMSBc
AT1G31690	176.012	-1.19421	0.299024	-3.99368	6.5056e-05	0.00411134	109	85	261	282	92.0746	123.348	249.69	238.935	99.59	UP_AtMSCtrl_DOWN_AtMSBc
AT5G19230	123.548	-1.49063	0.374038	-3.98525	6.74105e-05	0.00424406	59	56	221	179	49.8385	81.2645	211.423	151.664	99.58	UP_AtMSCtrl_DOWN_AtMSBc
AT3G45300	6994.74	-0.537217	0.135016	-3.97892	6.92279e-05	0.0043421	6492	4088	8474	9980	5483.93	5932.31	8106.79	8455.92	99.57	UP_AtMSCtrl_DOWN_AtMSBc
AT5G43700	985.073	0.787973	0.198306	3.97352	7.08195e-05	0.00442529	1654	756	656	966	1397.17	1097.07	627.573	818.479	99.56	DOWN_AtMSCtrl_UP_AtMSBc
AT4G15610	589.137	-0.75624	0.190648	-3.96668	7.28819e-05	0.00453717	540	289	751	900	456.149	419.383	718.456	762.558	99.55	UP_AtMSCtrl_DOWN_AtMSBc
AT1G03740	2594.77	-0.599797	0.151491	-3.95929	7.51719e-05	0.00466233	2323	1492	3474	3456	1962.29	2165.12	3323.46	2928.22	99.53	UP_AtMSCtrl_DOWN_AtMSBc
AT3G19010	450.754	-0.888574	0.224585	-3.95652	7.60488e-05	0.00469925	433	182	601	706	365.764	264.11	574.956	598.185	99.53	UP_AtMSCtrl_DOWN_AtMSBc
AT5G15970	741.52	-0.842513	0.213387	-3.94828	7.87137e-05	0.00484597	735	302	896	1239	620.87	438.248	857.173	1049.79	99.52	UP_AtMSCtrl_DOWN_AtMSBc
AT1G18570	692.423	-0.756184	0.191734	-3.94392	8.01609e-05	0.00491693	669	319	872	1071	565.118	462.917	834.213	907.444	99.51	UP_AtMSCtrl_DOWN_AtMSBc
AT1G31485	11.8624	-6.86238	1.74262	-3.93797	8.21741e-05	0.00501926	0	0	31	21	0	0	29.6567	17.793	99.5	UP_AtMSCtrl_DOWN_AtMSBc
AT1G50040	666.812	0.757384	0.192365	3.93722	8.2431e-05	0.00501926	1089	520	532	571	919.901	754.599	508.946	483.801	99.5	DOWN_AtMSCtrl_UP_AtMSBc
AT5G25460	6354.3	0.53187	0.135422	3.92749	8.58358e-05	0.00520758	9095	5059	5634	5905	7682.74	7341.38	5389.86	5003.23	99.48	DOWN_AtMSCtrl_UP_AtMSBc
AT1G79680	35.9591	-2.80347	0.714435	-3.92405	8.70744e-05	0.00526359	11	6	35	109	9.29193	8.70691	33.4833	92.3543	99.47	UP_AtMSCtrl_DOWN_AtMSBc
AT2G06950	1598.29	0.620701	0.158224	3.92293	8.74777e-05	0.00526888	2163	1411	1374	1421	1827.13	2047.58	1314.46	1203.99	99.47	DOWN_AtMSCtrl_UP_AtMSBc
AT3G15950	90.3579	-1.53981	0.393304	-3.91506	9.03799e-05	0.00542409	50	35	130	170	42.236	50.7903	124.367	144.039	99.46	UP_AtMSCtrl_DOWN_AtMSBc
AT3G07460	2309.94	0.621198	0.158813	3.91149	9.17276e-05	0.00548524	3595	1765	1790	2277	3036.77	2561.28	1712.43	1929.27	99.45	DOWN_AtMSCtrl_UP_AtMSBc
AT3G44880	1890.96	-0.610417	0.15622	-3.90741	9.32914e-05	0.00555884	1633	1114	2379	2705	1379.43	1616.58	2275.91	2291.91	99.44	UP_AtMSCtrl_DOWN_AtMSBc
AT5G03380	2276.82	-0.590243	0.15117	-3.9045	9.44191e-05	0.00560601	2071	1300	3025	3042	1749.42	1886.5	2893.92	2577.45	99.44	UP_AtMSCtrl_DOWN_AtMSBc
AT1G54100	4509.15	-0.590758	0.151406	-3.90183	9.54698e-05	0.00564829	4672	2238	5458	6634	3946.54	3247.68	5221.48	5620.9	99.44	UP_AtMSCtrl_DOWN_AtMSBc
AT1G09310	4009.83	-0.727531	0.187029	-3.88994	0.000100269	0.00591125	2826	2520	5165	5965	2387.18	3656.9	4941.18	5054.07	99.41	UP_AtMSCtrl_DOWN_AtMSBc
AT3G31161	30.1633	-2.90575	0.747242	-3.88863	0.000100811	0.00592226	11	3	72	45	9.29193	4.35346	68.88	38.1279	99.41	UP_AtMSCtrl_DOWN_AtMSBc
AT1G29900	3199.39	0.55812	0.143664	3.88489	0.000102375	0.00599308	4456	2658	2853	2888	3764.08	3857.16	2729.37	2446.96	99.4	DOWN_AtMSCtrl_UP_AtMSBc
AT3G46970	3697.8	-0.543636	0.140076	-3.88102	0.000104021	0.00606811	3565	2072	4781	4956	3011.43	3006.79	4573.82	4199.15	99.39	UP_AtMSCtrl_DOWN_AtMSBc
AT1G45180	198.93	1.07215	0.277055	3.86981	0.00010892	0.00633176	322	184	147	137	272	267.012	140.63	116.078	99.37	DOWN_AtMSCtrl_UP_AtMSBc
AT1G12110	1324.11	0.613917	0.158754	3.8671	0.000110139	0.00638039	1858	1126	1140	1183	1569.49	1634	1090.6	1002.34	99.36	DOWN_AtMSCtrl_UP_AtMSBc
AT3G05370	332.146	-0.917388	0.237829	-3.85734	0.000114629	0.00661752	244	176	421	548	206.112	255.403	402.756	464.313	99.34	UP_AtMSCtrl_DOWN_AtMSBc
AT4G31500	2803.68	-0.654156	0.169918	-3.84983	0.0001182	0.00680018	2885	1321	3914	3678	2437.02	1916.97	3744.39	3116.32	99.32	UP_AtMSCtrl_DOWN_AtMSBc
AT3G13920	8745	0.517901	0.134692	3.84506	0.000120521	0.00690989	12747	6772	7366	8661	10767.7	9827.2	7046.8	7338.35	99.31	DOWN_AtMSCtrl_UP_AtMSBc
AT2G46680	316.441	-0.979805	0.254937	-3.84333	0.000121378	0.00693519	266	138	514	412	224.696	200.259	491.726	349.082	99.31	UP_AtMSCtrl_DOWN_AtMSBc
AT3G13310	677.722	0.720269	0.187462	3.8422	0.000121935	0.00694321	1029	563	576	559	869.218	816.998	551.04	473.633	99.31	DOWN_AtMSCtrl_UP_AtMSBc
AT2G34490	112.415	-1.5419	0.402033	-3.83525	0.000125437	0.00711833	47	53	202	165	39.7019	76.911	193.247	139.802	99.29	UP_AtMSCtrl_DOWN_AtMSBc
AT1G78680	1371.59	-0.597935	0.156209	-3.8278	0.000129295	0.00731239	1307	743	1771	1900	1104.05	1078.21	1694.26	1609.85	99.27	UP_AtMSCtrl_DOWN_AtMSBc
AT5G49720	9538.17	0.524054	0.13695	3.82662	0.000129916	0.00732267	13876	7429	8572	8793	11721.3	10780.6	8200.54	7450.19	99.27	DOWN_AtMSCtrl_UP_AtMSBc
AT4G38550	6851.93	-0.678926	0.177549	-3.82389	0.000131364	0.00737936	5115	4287	9410	9281	4320.75	6221.09	9002.23	7863.67	99.26	UP_AtMSCtrl_DOWN_AtMSBc
AT1G69890	1290.87	-0.615373	0.161014	-3.82187	0.000132445	0.00741512	1275	662	1636	1842	1077.02	960.662	1565.11	1560.7	99.26	UP_AtMSCtrl_DOWN_AtMSBc
AT5G21940	4519.88	0.656273	0.171966	3.8163	0.000135469	0.00755907	7642	3172	3591	4232	6455.36	4603.05	3435.39	3585.72	99.24	DOWN_AtMSCtrl_UP_AtMSBc
AT1G72260	22.1894	-3.60822	0.947565	-3.80788	0.000140161	0.0077948	7	0	37	56	5.91305	0	35.3967	47.4481	99.22	UP_AtMSCtrl_DOWN_AtMSBc
AT4G39070	611.626	0.758236	0.199315	3.80421	0.000142259	0.00788521	810	589	458	554	684.224	854.728	438.153	469.397	99.21	DOWN_AtMSCtrl_UP_AtMSBc
AT5G19770	4146.22	0.523869	0.137893	3.7991	0.000145224	0.00799643	5674	3438	3664	3892	4792.95	4989.06	3505.23	3297.64	99.2	DOWN_AtMSCtrl_UP_AtMSBc
AT5G46180	1629.28	-0.626128	0.164784	-3.79968	0.000144885	0.00799643	1644	807	2189	2199	1388.72	1171.08	2094.14	1863.18	99.2	UP_AtMSCtrl_DOWN_AtMSBc
AT2G26690	708.616	-0.753489	0.198756	-3.79103	0.000150023	0.00823348	568	398	832	1158	479.801	577.558	795.946	981.158	99.18	UP_AtMSCtrl_DOWN_AtMSBc
AT1G72060	1196.09	-0.607793	0.160607	-3.78435	0.000154113	0.00843026	1089	673	1482	1735	919.901	976.625	1417.78	1470.04	99.16	UP_AtMSCtrl_DOWN_AtMSBc
AT1G19050	230.604	-1.02676	0.271579	-3.78072	0.000156378	0.00852616	179	105	367	316	151.205	152.371	351.097	267.743	99.15	UP_AtMSCtrl_DOWN_AtMSBc
AT4G23170	466.446	-0.778415	0.206027	-3.77822	0.00015795	0.00858386	434	220	632	679	366.609	319.253	604.613	575.308	99.14	UP_AtMSCtrl_DOWN_AtMSBc
AT3G17790	174.267	-1.41523	0.374898	-3.77498	0.000160021	0.00866562	160	36	283	282	135.155	52.2415	270.737	238.935	99.13	UP_AtMSCtrl_DOWN_AtMSBc
AT5G58200	2151.95	-0.597483	0.158305	-3.77424	0.000160494	0.00866562	1920	1244	2490	3303	1621.86	1805.23	2382.1	2798.59	99.13	UP_AtMSCtrl_DOWN_AtMSBc
AT5G23010	1237.2	-0.690736	0.183101	-3.77242	0.000161669	0.00870091	955	751	1599	1797	806.708	1089.81	1529.71	1522.57	99.13	UP_AtMSCtrl_DOWN_AtMSBc
AT1G03820	40.4564	-2.23411	0.592913	-3.76802	0.000164545	0.00882723	15	11	79	68	12.6708	15.9627	75.5766	57.6155	99.12	UP_AtMSCtrl_DOWN_AtMSBc
AT1G68570	351.819	0.876416	0.233165	3.75877	0.00017075	0.00913076	504	335	230	325	425.739	486.136	220.033	275.368	99.09	DOWN_AtMSCtrl_UP_AtMSBc
AT3G51000	3306.72	-0.540631	0.144126	-3.75111	0.000176052	0.00938419	3372	1749	4172	4543	2848.4	2538.06	3991.21	3849.22	99.06	UP_AtMSCtrl_DOWN_AtMSBc
AT5G04310	357.447	0.84142	0.224818	3.74268	0.000182072	0.00967414	523	328	289	278	441.789	475.978	276.477	235.546	99.03	DOWN_AtMSCtrl_UP_AtMSBc
AT4G21390	56.9126	-1.97953	0.530572	-3.73093	0.000190777	0.0101045	21	20	120	78	17.7391	29.023	114.8	66.0884	98.99	UP_AtMSCtrl_DOWN_AtMSBc
AT1G72930	864.083	-0.709811	0.190711	-3.72191	0.00019772	0.0104391	874	393	1184	1198	738.286	570.303	1132.69	1015.05	98.96	UP_AtMSCtrl_DOWN_AtMSBc
AT2G17740	43.4314	-2.17602	0.58485	-3.72064	0.000198719	0.0104588	14	14	86	70	11.8261	20.3161	82.2733	59.3101	98.95	UP_AtMSCtrl_DOWN_AtMSBc
AT1G17120	616.693	0.719881	0.194184	3.70721	0.000209553	0.0109943	885	543	442	600	747.578	787.975	422.846	508.372	98.9	DOWN_AtMSCtrl_UP_AtMSBc
AT4G25580	50.033	-1.91588	0.518358	-3.69606	0.000218973	0.0114525	24	15	82	94	20.2733	21.7673	78.4466	79.645	98.85	UP_AtMSCtrl_DOWN_AtMSBc
AT1G53170	497.972	-0.78793	0.213357	-3.69301	0.000221613	0.0115184	481	222	706	694	406.311	322.156	675.406	588.017	98.85	UP_AtMSCtrl_DOWN_AtMSBc
AT2G38750	72.7231	-1.62425	0.439758	-3.6935	0.000221191	0.0115184	46	22	130	113	38.8572	31.9253	124.367	95.7434	98.85	UP_AtMSCtrl_DOWN_AtMSBc
AT1G19440	253.041	0.967566	0.262081	3.69186	0.00022262	0.0115224	426	213	202	177	359.851	309.095	193.247	149.97	98.85	DOWN_AtMSCtrl_UP_AtMSBc
AT5G49280	146.746	-1.25429	0.339791	-3.69134	0.000223072	0.0115224	91	67	258	196	76.8696	97.2272	246.82	166.068	98.85	UP_AtMSCtrl_DOWN_AtMSBc
AT4G22200	349.505	-0.838423	0.227925	-3.67851	0.000234601	0.0120805	319	159	493	503	269.466	230.733	471.636	426.185	98.79	UP_AtMSCtrl_DOWN_AtMSBc
AT2G45220	25.8121	-3.01552	0.821306	-3.67161	0.000241024	0.0123731	8	3	29	76	6.75777	4.35346	27.7433	64.3938	98.76	UP_AtMSCtrl_DOWN_AtMSBc
AT2G45180	53196.2	0.54313	0.148006	3.66964	0.000242895	0.0124309	82745	38788	43217	53414	69896.4	56287.3	41344.2	45257	98.76	DOWN_AtMSCtrl_UP_AtMSBc
AT1G61120	25.9426	-2.84811	0.777367	-3.6638	0.000248505	0.0126791	8	4	36	67	6.75777	5.80461	34.44	56.7682	98.73	UP_AtMSCtrl_DOWN_AtMSBc
AT3G06770	251.639	0.936557	0.256114	3.6568	0.000255386	0.0129904	416	213	197	186	351.404	309.095	188.463	157.595	98.7	DOWN_AtMSCtrl_UP_AtMSBc
AT4G34000	282.864	-0.912694	0.249837	-3.65316	0.000259034	0.013136	249	125	349	479	210.335	181.394	333.877	405.85	98.69	UP_AtMSCtrl_DOWN_AtMSBc
AT1G69530	1310.04	0.576453	0.15787	3.65143	0.000260784	0.0131846	1814	1106	1068	1276	1532.32	1604.97	1021.72	1081.14	98.68	DOWN_AtMSCtrl_UP_AtMSBc
AT5G62920	166.454	-1.07156	0.293667	-3.6489	0.000263363	0.0132748	127	74	236	266	107.28	107.385	225.773	225.378	98.67	UP_AtMSCtrl_DOWN_AtMSBc
AT5G64170	133.462	-1.20481	0.330463	-3.64583	0.00026653	0.0133939	106	49	205	209	89.5404	71.1064	196.117	177.083	98.66	UP_AtMSCtrl_DOWN_AtMSBc
AT3G45860	1006.05	0.777492	0.213428	3.64288	0.0002696	0.0135075	1777	716	671	994	1501.07	1039.02	641.923	842.203	98.65	DOWN_AtMSCtrl_UP_AtMSBc
AT1G49600	1937.63	0.581927	0.159847	3.64051	0.000272094	0.0135108	2961	1477	1718	1726	2501.22	2143.35	1643.55	1462.42	98.65	DOWN_AtMSCtrl_UP_AtMSBc
AT3G55630	390.194	-0.868525	0.238536	-3.64107	0.000271506	0.0135108	362	169	455	678	305.789	245.245	435.283	574.46	98.65	UP_AtMSCtrl_DOWN_AtMSBc
AT5G54380	1783.6	0.587992	0.161483	3.64119	0.000271377	0.0135108	2340	1591	1576	1583	1976.65	2308.78	1507.71	1341.26	98.65	DOWN_AtMSCtrl_UP_AtMSBc
AT1G20330	2426.86	0.598451	0.164477	3.63852	0.000274214	0.0135756	3063	2247	2122	2159	2587.38	3260.74	2030.05	1829.29	98.64	DOWN_AtMSCtrl_UP_AtMSBc
AT3G23750	940.278	0.686119	0.18872	3.63565	0.000277285	0.0136871	1215	892	813	782	1026.34	1294.43	777.77	662.578	98.63	DOWN_AtMSCtrl_UP_AtMSBc
AT2G43510	124.449	-1.2202	0.33587	-3.63295	0.000280196	0.0137899	94	48	175	214	79.4038	69.6553	167.417	181.319	98.62	UP_AtMSCtrl_DOWN_AtMSBc
AT2G36050	988.896	0.6706	0.185188	3.62118	0.000293261	0.0143483	1295	921	868	820	1093.91	1336.51	830.386	694.775	98.57	DOWN_AtMSCtrl_UP_AtMSBc
AT3G17820	263.116	-0.893249	0.246667	-3.62127	0.000293158	0.0143483	213	130	373	386	179.926	188.65	356.837	327.053	98.57	UP_AtMSCtrl_DOWN_AtMSBc
AT2G32100	345.616	0.812977	0.224804	3.61639	0.000298743	0.0145738	497	318	275	281	419.826	461.466	263.083	238.088	98.54	DOWN_AtMSCtrl_UP_AtMSBc
AT5G04340	510.18	-0.73342	0.203032	-3.61233	0.000303452	0.0147603	472	253	617	808	398.708	367.141	590.263	684.608	98.52	UP_AtMSCtrl_DOWN_AtMSBc
AT2G46450	550.809	-0.69066	0.191504	-3.60651	0.000310344	0.0150517	493	294	715	798	416.447	426.639	684.016	676.135	98.49	UP_AtMSCtrl_DOWN_AtMSBc
AT1G74950	1010.9	-0.637109	0.176988	-3.59973	0.000318547	0.0154047	847	599	1333	1397	715.479	869.24	1275.24	1183.66	98.46	UP_AtMSCtrl_DOWN_AtMSBc
AT5G26340	581.408	-0.760179	0.21146	-3.59491	0.000324506	0.0156476	576	258	834	787	486.559	374.397	797.86	666.815	98.44	UP_AtMSCtrl_DOWN_AtMSBc
AT3G18740	1483.65	0.66806	0.185922	3.59322	0.000326617	0.0156602	2373	1128	1034	1539	2004.52	1636.9	989.193	1303.97	98.43	DOWN_AtMSCtrl_UP_AtMSBc
AT3G58850	108.45	1.32426	0.368547	3.5932	0.000326646	0.0156602	212	90	58	81	179.081	130.604	55.4866	68.6302	98.43	DOWN_AtMSCtrl_UP_AtMSBc
AT4G03400	305.341	0.830347	0.23136	3.58898	0.000331978	0.0158703	475	262	234	255	401.242	380.202	223.86	216.058	98.41	DOWN_AtMSCtrl_UP_AtMSBc
AT1G22930	4916.74	-0.514414	0.143401	-3.58725	0.000334186	0.0159302	5140	2587	6170	6690	4341.86	3754.13	5902.63	5668.35	98.41	UP_AtMSCtrl_DOWN_AtMSBc
AT1G76790	30.7562	-2.64555	0.739629	-3.57687	0.000347734	0.0164818	7	8	35	85	5.91305	11.6092	33.4833	72.0194	98.35	UP_AtMSCtrl_DOWN_AtMSBc
AT5G44290	1522.63	-0.593465	0.165896	-3.57732	0.000347129	0.0164818	1391	864	1733	2365	1175.01	1253.8	1657.9	2003.83	98.35	UP_AtMSCtrl_DOWN_AtMSBc
AT1G28380	1092.87	-0.58334	0.163299	-3.57221	0.000353975	0.0166358	1034	604	1325	1598	873.441	876.496	1267.58	1353.96	98.34	UP_AtMSCtrl_DOWN_AtMSBc
AT1G79720	943.963	0.664107	0.185852	3.57332	0.000352489	0.0166358	1459	745	851	765	1232.45	1081.11	814.123	648.174	98.34	DOWN_AtMSCtrl_UP_AtMSBc
AT3G53460	15780.6	0.539789	0.151078	3.57293	0.000353014	0.0166358	24041	11775	14604	13875	20307.9	17087.3	13971.2	11756.1	98.34	DOWN_AtMSCtrl_UP_AtMSBc
AT5G56140	3248.83	0.54875	0.15365	3.57143	0.000355039	0.0166389	5024	2393	2791	3079	4243.88	3472.61	2670.06	2608.8	98.34	DOWN_AtMSCtrl_UP_AtMSBc
AT3G56410	1244.85	-0.656981	0.184248	-3.56573	0.000362839	0.0169569	1024	737	1764	1602	864.994	1069.5	1687.56	1357.35	98.3	UP_AtMSCtrl_DOWN_AtMSBc
AT1G80610	199.831	-0.990048	0.2778	-3.56389	0.0003654	0.0170288	146	100	291	298	123.329	145.115	278.39	252.491	98.3	UP_AtMSCtrl_DOWN_AtMSBc
AT1G55920	638.289	-0.70015	0.19668	-3.55984	0.000371077	0.0172453	528	364	887	862	446.013	528.219	848.563	730.361	98.28	UP_AtMSCtrl_DOWN_AtMSBc
AT2G19800	2301.51	0.73556	0.207089	3.55191	0.000382446	0.0177242	2562	2474	1850	1985	2164.17	3590.15	1769.83	1681.86	98.23	DOWN_AtMSCtrl_UP_AtMSBc
AT1G10070	4826.48	-0.556336	0.156664	-3.55114	0.000383563	0.0177268	5012	2466	5463	7397	4233.74	3578.54	5226.27	6267.38	98.23	UP_AtMSCtrl_DOWN_AtMSBc
AT1G52190	2364.29	0.533489	0.150353	3.54824	0.000387811	0.0178736	3220	1980	2148	2135	2720	2873.28	2054.92	1808.96	98.21	DOWN_AtMSCtrl_UP_AtMSBc
AT2G05070	6527.7	-0.521034	0.146944	-3.5458	0.000391426	0.0179905	5819	4004	8435	8634	4915.43	5810.41	8069.48	7315.47	98.2	UP_AtMSCtrl_DOWN_AtMSBc
AT1G03870	1884.88	0.704239	0.199047	3.53805	0.000403098	0.0184022	2199	1941	1617	1556	1857.54	2816.69	1546.93	1318.38	98.16	DOWN_AtMSCtrl_UP_AtMSBc
AT3G23730	220.762	0.933446	0.26386	3.53766	0.000403692	0.0184022	319	214	160	177	269.466	310.546	153.067	149.97	98.16	DOWN_AtMSCtrl_UP_AtMSBc
AT5G58260	695.937	-0.645314	0.182355	-3.53878	0.000401975	0.0184022	613	392	906	980	517.814	568.851	866.74	830.341	98.16	UP_AtMSCtrl_DOWN_AtMSBc
AT3G54720	454.882	0.819765	0.23203	3.53302	0.000410841	0.018677	573	468	315	419	484.025	679.139	301.35	355.013	98.13	DOWN_AtMSCtrl_UP_AtMSBc
AT5G07440	3128.93	-0.49557	0.140337	-3.53129	0.000413537	0.0187485	3073	1790	3936	4198	2595.83	2597.56	3765.44	3556.91	98.13	UP_AtMSCtrl_DOWN_AtMSBc
AT5G14120	17058.9	0.503183	0.142674	3.5268	0.000420609	0.0190174	22042	14740	15691	15597	18619.3	21390	15011	13215.1	98.1	DOWN_AtMSCtrl_UP_AtMSBc
AT4G38825	48.4958	2.12856	0.604438	3.52156	0.000429022	0.0193454	87	58	30	9	73.4907	84.1668	28.7	7.62558	98.07	DOWN_AtMSCtrl_UP_AtMSBc
AT1G70700	2101.53	-0.542887	0.154568	-3.51228	0.000444285	0.0199797	1942	1228	2780	2743	1640.45	1782.01	2659.53	2324.11	98	UP_AtMSCtrl_DOWN_AtMSBc
AT4G21870	299.634	0.962463	0.274198	3.51011	0.000447929	0.0200894	414	305	259	187	349.714	442.601	247.777	158.443	97.99	DOWN_AtMSCtrl_UP_AtMSBc
AT5G56870	7962.3	-0.48509	0.138346	-3.50636	0.00045428	0.0203196	8343	4288	9488	11215	7047.51	6222.54	9076.85	9502.32	97.97	UP_AtMSCtrl_DOWN_AtMSBc
AT5G66052	2801.31	0.64027	0.182706	3.50437	0.000457684	0.0204171	4786	1916	2214	2672	4042.83	2780.41	2118.06	2263.95	97.96	DOWN_AtMSCtrl_UP_AtMSBc
AT5G53160	6900.03	0.582787	0.166516	3.49988	0.000465462	0.0207087	11281	4836	6075	6186	9529.3	7017.77	5811.75	5241.32	97.93	DOWN_AtMSCtrl_UP_AtMSBc
AT5G67480	5828.76	0.488794	0.139756	3.49747	0.000469688	0.0208412	8058	4691	4744	6093	6806.76	6807.35	4538.42	5162.52	97.92	DOWN_AtMSCtrl_UP_AtMSBc
AT1G78450	487.557	0.733773	0.21071	3.48239	0.000496967	0.0219931	779	385	416	396	658.037	558.693	397.973	335.526	97.8	DOWN_AtMSCtrl_UP_AtMSBc
AT2G27310	398.41	-0.752945	0.216419	-3.4791	0.000503098	0.0222055	326	220	535	575	275.379	319.253	511.816	487.19	97.78	UP_AtMSCtrl_DOWN_AtMSBc
AT1G71040	470.635	-0.698598	0.201014	-3.47537	0.000510158	0.0223986	427	246	595	703	360.696	356.983	569.216	595.643	97.76	UP_AtMSCtrl_DOWN_AtMSBc
AT3G02070	597.101	0.668542	0.192357	3.47552	0.000509856	0.0223986	843	520	448	582	712.1	754.599	428.586	493.121	97.76	DOWN_AtMSCtrl_UP_AtMSBc
AT1G08590	199.942	0.947325	0.272796	3.47265	0.000515356	0.0225084	316	179	134	171	266.932	259.756	128.193	144.886	97.75	DOWN_AtMSCtrl_UP_AtMSBc
AT5G43450	432.846	-0.881493	0.253803	-3.47314	0.000514408	0.0225084	288	254	498	759	243.28	368.593	476.42	643.091	97.75	UP_AtMSCtrl_DOWN_AtMSBc
AT5G24470	405.359	-0.730359	0.21067	-3.46685	0.000526605	0.0229396	353	215	523	603	298.186	311.998	500.336	510.914	97.71	UP_AtMSCtrl_DOWN_AtMSBc
AT1G56240	17.7259	-3.52392	1.01762	-3.4629	0.000534385	0.0232035	2	3	43	28	1.68944	4.35346	41.1366	23.724	97.68	UP_AtMSCtrl_DOWN_AtMSBc
AT5G45340	167.689	-1.08778	0.314173	-3.46237	0.000535444	0.0232035	103	89	252	252	87.0062	129.153	241.08	213.516	97.68	UP_AtMSCtrl_DOWN_AtMSBc
AT5G39020	287.029	-0.882128	0.255492	-3.45266	0.000555083	0.0239923	252	131	445	377	212.87	190.101	425.716	319.427	97.6	UP_AtMSCtrl_DOWN_AtMSBc
AT1G55260	145.278	-1.08976	0.315986	-3.44878	0.000563131	0.0242073	121	57	206	235	102.211	82.7157	197.073	199.112	97.58	UP_AtMSCtrl_DOWN_AtMSBc
AT4G02130	1353.99	0.66977	0.194206	3.44877	0.000563144	0.0242073	1940	1162	1300	1000	1638.76	1686.24	1243.67	847.287	97.58	DOWN_AtMSCtrl_UP_AtMSBc
AT5G40170	1578.81	-0.586086	0.169971	-3.44816	0.000564411	0.0242073	1316	976	2013	2197	1111.65	1416.32	1925.77	1861.49	97.58	UP_AtMSCtrl_DOWN_AtMSBc
AT4G38470	4228.76	-0.480523	0.139441	-3.44606	0.000568828	0.0243342	4031	2521	4983	6001	3405.07	3658.35	4767.07	5084.57	97.57	UP_AtMSCtrl_DOWN_AtMSBc
AT1G13860	121.918	-1.1563	0.336229	-3.43904	0.000583785	0.0249102	91	51	182	192	76.8696	74.0087	174.113	162.679	97.51	UP_AtMSCtrl_DOWN_AtMSBc
AT2G39800	363.316	-0.797318	0.232031	-3.43626	0.000589815	0.0251032	337	169	432	602	284.671	245.245	413.28	510.067	97.49	UP_AtMSCtrl_DOWN_AtMSBc
AT1G78070	198.76	-0.949291	0.276576	-3.4323	0.000598494	0.0254078	166	90	292	289	140.224	130.604	279.347	244.866	97.46	UP_AtMSCtrl_DOWN_AtMSBc
AT2G25800	1561.43	0.577359	0.168406	3.42838	0.000607193	0.0257117	2166	1316	1457	1313	1829.67	1909.72	1393.86	1112.49	97.43	DOWN_AtMSCtrl_UP_AtMSBc
AT2G26640	439.46	0.741801	0.216542	3.42567	0.000613295	0.0259043	660	374	303	434	557.516	542.731	289.87	367.722	97.41	DOWN_AtMSCtrl_UP_AtMSBc
AT5G59130	61.962	-1.65734	0.484145	-3.42323	0.00061881	0.0260713	27	26	109	98	22.8075	37.7299	104.277	83.0341	97.39	UP_AtMSCtrl_DOWN_AtMSBc
AT1G21000	2388.89	-0.536919	0.156999	-3.4199	0.000626441	0.0263263	2501	1229	3110	3168	2112.65	1783.47	2975.23	2684.2	97.37	UP_AtMSCtrl_DOWN_AtMSBc
AT3G47340	26375.6	-0.436506	0.127751	-3.41684	0.000633534	0.0264909	27098	15119	31996	35481	22890.2	21940	30609.5	30062.6	97.35	UP_AtMSCtrl_DOWN_AtMSBc
AT5G52320	45.7769	-1.94047	0.567898	-3.41694	0.000633293	0.0264909	15	18	80	80	12.6708	26.1207	76.5333	67.7829	97.35	UP_AtMSCtrl_DOWN_AtMSBc
AT2G47190	70.5966	-1.62301	0.47529	-3.41479	0.000638317	0.0266242	53	16	132	104	44.7702	23.2184	126.28	88.1178	97.34	UP_AtMSCtrl_DOWN_AtMSBc
AT5G15840	129.701	1.20573	0.353764	3.40829	0.000653712	0.0271983	168	152	89	84	141.913	220.575	85.1433	71.1721	97.28	DOWN_AtMSCtrl_UP_AtMSBc
AT5G41120	56.9127	-1.64877	0.484121	-3.4057	0.000659952	0.0273897	31	20	97	94	26.1863	29.023	92.7966	79.645	97.26	UP_AtMSCtrl_DOWN_AtMSBc
AT2G05590	187.407	1.03379	0.303801	3.40286	0.000666836	0.0276067	269	191	104	172	227.23	277.17	99.4933	145.733	97.24	DOWN_AtMSCtrl_UP_AtMSBc
AT4G23600	824.779	-1.62632	0.478054	-3.40196	0.000669045	0.0276296	330	365	1461	1290	278.758	529.67	1397.69	1093	97.24	UP_AtMSCtrl_DOWN_AtMSBc
AT1G08650	202.422	-1.12282	0.330299	-3.39941	0.000675305	0.0278192	147	90	379	227	124.174	130.604	362.577	192.334	97.22	UP_AtMSCtrl_DOWN_AtMSBc
AT1G75370	1294.58	0.636183	0.187261	3.3973	0.000680532	0.0279655	2166	909	1033	1229	1829.67	1319.1	988.236	1041.32	97.2	DOWN_AtMSCtrl_UP_AtMSBc
AT3G45160	409.384	0.814757	0.240083	3.39365	0.000689679	0.0282717	518	419	276	387	437.565	608.033	264.04	327.9	97.17	DOWN_AtMSCtrl_UP_AtMSBc
AT1G27030	234.748	-0.886001	0.261277	-3.39105	0.00069626	0.0284716	180	123	334	341	152.05	178.492	319.527	288.925	97.15	UP_AtMSCtrl_DOWN_AtMSBc
AT1G14370	474.859	-0.726244	0.214422	-3.38698	0.000706662	0.0288263	439	237	691	618	370.832	343.923	661.056	523.623	97.12	UP_AtMSCtrl_DOWN_AtMSBc
AT5G66675	399.51	-0.71586	0.211818	-3.3796	0.000725918	0.0295396	357	209	505	602	301.565	303.291	483.116	510.067	97.05	UP_AtMSCtrl_DOWN_AtMSBc
AT1G49130	1617.09	0.544164	0.161133	3.37711	0.000732516	0.0296633	2412	1239	1460	1459	2037.47	1797.98	1396.73	1236.19	97.03	DOWN_AtMSCtrl_UP_AtMSBc
AT2G45510	419.903	-0.743955	0.220273	-3.37742	0.0007317	0.0296633	397	201	498	680	335.354	291.682	476.42	576.155	97.03	UP_AtMSCtrl_DOWN_AtMSBc
AT3G55170	205.89	1.03297	0.306061	3.37503	0.00073807	0.0298159	398	149	124	180	336.199	216.222	118.627	152.512	97.02	DOWN_AtMSCtrl_UP_AtMSBc
AT3G20410	1495.96	-0.524183	0.155637	-3.36798	0.000757204	0.0305149	1407	873	1785	2149	1188.52	1266.86	1707.65	1820.82	96.95	UP_AtMSCtrl_DOWN_AtMSBc
AT2G20724	63.5779	1.54616	0.459893	3.362	0.000773814	0.0309924	126	57	38	34	106.435	82.7157	36.3533	28.8078	96.9	DOWN_AtMSCtrl_UP_AtMSBc
AT2G37362	187.538	0.968933	0.288194	3.36209	0.000773555	0.0309924	331	149	133	150	279.603	216.222	127.237	127.093	96.9	DOWN_AtMSCtrl_UP_AtMSBc
AT3G09390	8435.5	0.615298	0.183032	3.36171	0.000774624	0.0309924	14522	5613	6578	8305	12267	8145.31	6292.95	7036.72	96.9	DOWN_AtMSCtrl_UP_AtMSBc
AT1G30755	241.251	-0.928405	0.276397	-3.35896	0.000782377	0.0311841	222	99	287	424	187.528	143.664	274.563	359.25	96.88	UP_AtMSCtrl_DOWN_AtMSBc
AT3G15210	1028.74	-0.603609	0.179716	-3.35868	0.000783155	0.0311841	1068	502	1364	1392	902.162	728.478	1304.89	1179.42	96.88	UP_AtMSCtrl_DOWN_AtMSBc
AT2G31360	1211.33	0.53612	0.159795	3.35506	0.00079349	0.0315204	1713	979	1000	1205	1447.01	1420.68	956.666	1020.98	96.85	DOWN_AtMSCtrl_UP_AtMSBc
AT3G49870	1165.35	0.61542	0.183536	3.35312	0.000799064	0.0316665	1907	832	971	1079	1610.88	1207.36	928.923	914.223	96.83	DOWN_AtMSCtrl_UP_AtMSBc
AT1G17147	75.4936	-1.40984	0.420822	-3.3502	0.00080754	0.031851	48	29	123	120	40.5466	42.0834	117.67	101.674	96.81	UP_AtMSCtrl_DOWN_AtMSBc
AT3G56710	95.2757	-1.34607	0.401786	-3.35021	0.000807508	0.031851	59	40	174	126	49.8385	58.0461	166.46	106.758	96.81	UP_AtMSCtrl_DOWN_AtMSBc
AT1G02850	449.552	-0.808807	0.241646	-3.34707	0.000816712	0.0319976	468	176	560	722	395.329	255.403	535.733	611.741	96.8	UP_AtMSCtrl_DOWN_AtMSBc
AT4G36220	940.607	-0.628021	0.187574	-3.34812	0.000813624	0.0319976	780	566	1290	1237	658.882	821.352	1234.1	1048.09	96.8	UP_AtMSCtrl_DOWN_AtMSBc
AT5G62280	695.033	0.62369	0.186345	3.34697	0.00081701	0.0319976	1060	544	602	613	895.404	789.427	575.913	519.387	96.8	DOWN_AtMSCtrl_UP_AtMSBc
AT5G44340	13462	0.477959	0.142846	3.34597	0.000819952	0.0320377	20066	9917	12274	12705	16950.2	14391.1	11742.1	10764.8	96.8	DOWN_AtMSCtrl_UP_AtMSBc
AT5G20250	48122.5	0.430001	0.128542	3.34522	0.000822175	0.0320495	65913	37766	44383	46676	55678.1	54804.2	42459.7	39548	96.8	DOWN_AtMSCtrl_UP_AtMSBc
AT1G48570	347.919	0.7592	0.227044	3.34385	0.000826241	0.0321329	480	324	256	320	405.466	470.173	244.907	271.132	96.79	DOWN_AtMSCtrl_UP_AtMSBc
AT1G15890	175.654	-0.961274	0.287592	-3.34249	0.000830289	0.0322152	135	86	243	273	114.037	124.799	232.47	231.309	96.78	UP_AtMSCtrl_DOWN_AtMSBc
AT1G20620	197243	-0.449677	0.134669	-3.33913	0.000840398	0.0324565	210392	107346	244606	261387	177722	155775	234006	221470	96.75	UP_AtMSCtrl_DOWN_AtMSBc
AT2G03980	592.037	-0.664653	0.199015	-3.33972	0.000838641	0.0324565	560	305	684	942	473.044	442.601	654.36	798.144	96.75	UP_AtMSCtrl_DOWN_AtMSBc
AT1G58200	1535.4	-0.574922	0.172278	-3.33719	0.000846316	0.0325542	1275	960	1915	2171	1077.02	1393.11	1832.02	1839.46	96.74	UP_AtMSCtrl_DOWN_AtMSBc
AT4G12490	20.3472	-2.91693	0.874112	-3.33702	0.000846832	0.0325542	6	3	46	33	5.06832	4.35346	44.0066	27.9605	96.74	UP_AtMSCtrl_DOWN_AtMSBc
AT2G46900	2648.59	0.526124	0.157717	3.33587	0.000850339	0.0326139	4094	1924	2262	2573	3458.29	2792.02	2163.98	2180.07	96.74	DOWN_AtMSCtrl_UP_AtMSBc
AT3G13520	294.629	0.831079	0.24929	3.33378	0.000856751	0.0327845	507	224	231	241	428.273	325.058	220.99	204.196	96.72	DOWN_AtMSCtrl_UP_AtMSBc
AT3G22160	160.272	-1.37091	0.411451	-3.33189	0.000862589	0.0329323	58	91	294	211	48.9938	132.055	281.26	178.778	96.71	UP_AtMSCtrl_DOWN_AtMSBc
AT2G23600	2127.73	0.59831	0.179797	3.32771	0.000875644	0.0333545	3149	1699	1476	2329	2660.03	2465.51	1412.04	1973.33	96.66	DOWN_AtMSCtrl_UP_AtMSBc
AT2G07698	589.697	-0.631678	0.190156	-3.3219	0.000894066	0.0339786	562	310	780	812	474.733	449.857	746.2	687.997	96.6	UP_AtMSCtrl_DOWN_AtMSBc
AT1G35140	497.207	0.654285	0.197063	3.32018	0.000899595	0.0340684	703	429	408	451	593.839	622.544	390.32	382.126	96.59	DOWN_AtMSCtrl_UP_AtMSBc
AT3G51550	5229.68	0.495627	0.149308	3.3195	0.000901788	0.0340684	7404	4123	4981	4622	6254.31	5983.1	4765.15	3916.16	96.59	DOWN_AtMSCtrl_UP_AtMSBc
AT3G51600	11111.3	0.470784	0.141834	3.31926	0.000902555	0.0340684	16351	8271	10231	10437	13812	12002.5	9787.65	8843.13	96.59	DOWN_AtMSCtrl_UP_AtMSBc
AT1G27960	237.441	1.0095	0.304312	3.31732	0.00090887	0.0342293	323	250	122	233	272.845	362.788	116.713	197.418	96.58	DOWN_AtMSCtrl_UP_AtMSBc
AT1G09970	5682.2	-0.488559	0.147399	-3.31453	0.000917982	0.0344946	5835	3120	7525	7168	4928.95	4527.59	7198.91	6073.35	96.55	UP_AtMSCtrl_DOWN_AtMSBc
AT1G51650	707.295	0.617716	0.186452	3.313	0.000923016	0.0345282	974	614	538	709	822.758	891.007	514.686	600.726	96.55	DOWN_AtMSCtrl_UP_AtMSBc
AT5G16000	550.794	0.666234	0.201086	3.31318	0.000922431	0.0345282	847	438	408	545	715.479	635.604	390.32	461.771	96.55	DOWN_AtMSCtrl_UP_AtMSBc
AT5G58120	374.396	-0.740556	0.223891	-3.30767	0.000940766	0.0351135	360	176	466	581	304.099	255.403	445.806	492.274	96.49	UP_AtMSCtrl_DOWN_AtMSBc
AT4G34230	267.625	-0.823028	0.249628	-3.29702	0.000977165	0.0363907	229	133	390	367	193.441	193.003	373.1	310.954	96.36	UP_AtMSCtrl_DOWN_AtMSBc
AT1G25560	4246.63	0.588872	0.178772	3.29398	0.00098781	0.0366994	7117	2886	3748	3778	6011.88	4188.02	3585.59	3201.05	96.33	DOWN_AtMSCtrl_UP_AtMSBc
AT4G00165	566.004	-0.74716	0.226866	-3.29339	0.000989855	0.0366994	444	325	866	695	375.056	471.624	828.473	588.864	96.33	UP_AtMSCtrl_DOWN_AtMSBc
AT1G73880	140.548	1.02866	0.312525	3.29144	0.000996772	0.0367168	225	129	95	111	190.062	187.199	90.8833	94.0488	96.33	DOWN_AtMSCtrl_UP_AtMSBc
AT4G21960	44745.1	-0.545812	0.16583	-3.29139	0.000996926	0.0367168	37856	28106	62163	55173	31977.8	40786.1	59469.2	46747.4	96.33	UP_AtMSCtrl_DOWN_AtMSBc
AT5G13200	170.648	-0.990369	0.300815	-3.29228	0.000993785	0.0367168	154	67	235	272	130.087	97.2272	224.817	230.462	96.33	UP_AtMSCtrl_DOWN_AtMSBc
AT4G35730	134.503	1.0895	0.331164	3.28991	0.00100219	0.036769	225	121	104	86	190.062	175.589	99.4933	72.8667	96.32	DOWN_AtMSCtrl_UP_AtMSBc
AT5G65600	20.0167	-3.01182	0.915516	-3.28975	0.00100275	0.036769	8	1	45	34	6.75777	1.45115	43.05	28.8078	96.32	UP_AtMSCtrl_DOWN_AtMSBc
AT4G13410	15.9409	-3.44075	1.0468	-3.28692	0.00101289	0.0370592	3	2	22	44	2.53416	2.9023	21.0467	37.2806	96.29	UP_AtMSCtrl_DOWN_AtMSBc
AT1G62380	6999.98	0.491962	0.149788	3.28439	0.00102202	0.0373115	8657	6239	6191	6740	7312.75	9053.74	5922.72	5710.71	96.27	DOWN_AtMSCtrl_UP_AtMSBc
AT1G14280	1261.18	0.536898	0.163524	3.28331	0.00102596	0.0373737	1864	972	1122	1164	1574.56	1410.52	1073.38	986.242	96.26	DOWN_AtMSCtrl_UP_AtMSBc
AT1G27460	406.977	0.709335	0.216127	3.28203	0.00103063	0.0374223	573	363	297	393	484.025	526.768	284.13	332.984	96.26	DOWN_AtMSCtrl_UP_AtMSBc
AT3G06150	782.762	0.634212	0.193256	3.28171	0.00103178	0.0374223	1203	611	717	640	1016.2	886.654	685.93	542.264	96.26	DOWN_AtMSCtrl_UP_AtMSBc
AT3G14240	1722.47	0.533794	0.162835	3.27813	0.00104497	0.0377364	2296	1472	1600	1515	1939.48	2136.1	1530.67	1283.64	96.23	DOWN_AtMSCtrl_UP_AtMSBc
AT4G37310	302.354	-0.761471	0.232274	-3.27833	0.00104425	0.0377364	265	155	393	454	223.851	224.929	375.97	384.668	96.23	UP_AtMSCtrl_DOWN_AtMSBc
AT3G23430	163.609	1.10493	0.33736	3.27522	0.00105578	0.0380447	202	191	92	140	170.634	277.17	88.0133	118.62	96.2	DOWN_AtMSCtrl_UP_AtMSBc
AT5G58550	189.147	0.948326	0.289948	3.27067	0.00107293	0.0385792	269	187	151	134	227.23	271.365	144.457	113.536	96.14	DOWN_AtMSCtrl_UP_AtMSBc
AT1G12780	6873.14	0.439514	0.134441	3.26919	0.00107854	0.0386146	9694	5261	5977	7024	8188.72	7634.51	5717.99	5951.34	96.14	DOWN_AtMSCtrl_UP_AtMSBc
AT4G17490	474.144	-0.708476	0.216699	-3.2694	0.00107776	0.0386146	372	281	645	658	314.236	407.774	617.05	557.515	96.14	UP_AtMSCtrl_DOWN_AtMSBc
AT3G26180	698.395	-0.681615	0.208549	-3.26837	0.0010817	0.0386446	741	306	854	1070	625.938	444.052	816.993	906.597	96.14	UP_AtMSCtrl_DOWN_AtMSBc
AT5G15580	711.91	0.645288	0.197487	3.2675	0.00108501	0.03868	922	661	632	596	778.833	959.211	604.613	504.983	96.13	DOWN_AtMSCtrl_UP_AtMSBc
AT4G36900	473.829	0.865108	0.264926	3.26547	0.00109281	0.0388753	936	297	357	392	790.659	430.992	341.53	332.136	96.11	DOWN_AtMSCtrl_UP_AtMSBc
AT3G10250	487.293	-0.66302	0.203077	-3.26487	0.00109515	0.0388756	417	278	640	686	352.249	403.42	612.266	581.239	96.11	UP_AtMSCtrl_DOWN_AtMSBc
AT5G06860	271.953	-0.887375	0.271911	-3.26347	0.00110057	0.0389848	178	161	377	405	150.36	233.635	360.663	343.151	96.1	UP_AtMSCtrl_DOWN_AtMSBc
AT5G59540	841.163	-0.628173	0.192566	-3.26211	0.00110586	0.0390893	821	432	1206	1051	693.516	626.898	1153.74	890.498	96.09	UP_AtMSCtrl_DOWN_AtMSBc
AT5G19190	1749.96	0.511502	0.156855	3.26099	0.00111023	0.039161	2325	1482	1598	1601	1963.98	2150.61	1528.75	1356.51	96.08	DOWN_AtMSCtrl_UP_AtMSBc
AT1G67328	84.1292	-1.38991	0.426361	-3.25993	0.00111439	0.0392246	41	41	140	128	34.6336	59.4972	133.933	108.453	96.08	UP_AtMSCtrl_DOWN_AtMSBc
AT1G61740	3506.31	0.556154	0.170678	3.25849	0.00112006	0.0393413	4204	3307	3129	3165	3551.21	4798.96	2993.41	2681.66	96.07	DOWN_AtMSCtrl_UP_AtMSBc
AT1G14920	1640	0.53572	0.16488	3.24915	0.00115749	0.0404137	2414	1269	1528	1437	2039.16	1841.51	1461.79	1217.55	95.96	DOWN_AtMSCtrl_UP_AtMSBc
AT1G61890	686.137	-0.747722	0.230135	-3.24906	0.00115786	0.0404137	461	440	922	985	389.416	638.507	882.046	834.578	95.96	UP_AtMSCtrl_DOWN_AtMSBc
AT4G23260	261.401	-0.887918	0.273241	-3.24958	0.00115575	0.0404137	218	126	286	478	184.149	182.845	273.607	405.003	95.96	UP_AtMSCtrl_DOWN_AtMSBc
AT1G79245	3814.72	-0.62064	0.191102	-3.24769	0.00116348	0.0405249	2824	2503	4460	5871	2385.49	3632.23	4266.73	4974.42	95.95	UP_AtMSCtrl_DOWN_AtMSBc
AT1G11050	498.351	-0.639068	0.19738	-3.23775	0.00120478	0.0417889	459	270	648	701	387.727	391.811	619.92	593.948	95.82	UP_AtMSCtrl_DOWN_AtMSBc
AT1G42990	719.423	-0.661164	0.204172	-3.23828	0.00120254	0.0417889	758	325	984	973	640.298	471.624	941.36	824.41	95.82	UP_AtMSCtrl_DOWN_AtMSBc
AT3G44720	1013.23	-0.592635	0.183201	-3.23489	0.00121689	0.0420342	889	597	1407	1286	750.957	866.338	1346.03	1089.61	95.8	UP_AtMSCtrl_DOWN_AtMSBc
AT4G17090	2625.47	-0.509413	0.157456	-3.23527	0.00121527	0.0420342	2624	1458	3552	3271	2216.55	2115.78	3398.08	2771.48	95.8	UP_AtMSCtrl_DOWN_AtMSBc
AT2G04039	309.334	-0.771623	0.238646	-3.23334	0.0012235	0.0421754	252	169	377	494	212.87	245.245	360.663	418.56	95.78	UP_AtMSCtrl_DOWN_AtMSBc
AT4G00360	2523.05	-0.505456	0.156423	-3.23135	0.00123208	0.0423837	2528	1402	3390	3162	2135.45	2034.51	3243.1	2679.12	95.76	UP_AtMSCtrl_DOWN_AtMSBc
AT4G03210	351.512	0.716403	0.221748	3.23071	0.00123482	0.0423904	501	311	266	327	423.205	451.308	254.473	277.063	95.76	DOWN_AtMSCtrl_UP_AtMSBc
AT1G76600	97.9486	-1.19542	0.370315	-3.22811	0.00124611	0.0426901	69	42	137	167	58.2857	60.9484	131.063	141.497	95.73	UP_AtMSCtrl_DOWN_AtMSBc
AT1G17860	147.547	-1.01498	0.314694	-3.2253	0.00125842	0.0427261	105	74	218	219	88.6957	107.385	208.553	185.556	95.73	UP_AtMSCtrl_DOWN_AtMSBc
AT1G18020	834.698	-0.563201	0.174553	-3.22652	0.00125304	0.0427261	838	440	1042	1175	707.876	638.507	996.846	995.562	95.73	UP_AtMSCtrl_DOWN_AtMSBc
AT1G21110	43.7728	-1.79049	0.555201	-3.22495	0.00125996	0.0427261	24	13	81	69	20.2733	18.865	77.49	58.4628	95.73	UP_AtMSCtrl_DOWN_AtMSBc
AT2G15040	171.205	-1.22504	0.379844	-3.22512	0.00125921	0.0427261	74	100	203	334	62.5093	145.115	194.203	282.994	95.73	UP_AtMSCtrl_DOWN_AtMSBc
AT4G38540	3067.15	-0.556144	0.172359	-3.22666	0.00125246	0.0427261	3411	1434	3859	4266	2881.34	2080.95	3691.78	3614.53	95.73	UP_AtMSCtrl_DOWN_AtMSBc
AT2G18050	1210.78	-0.618732	0.19192	-3.22391	0.00126454	0.0427941	1321	545	1461	1816	1115.88	790.878	1397.69	1538.67	95.72	UP_AtMSCtrl_DOWN_AtMSBc
AT1G13640	2235.23	0.514205	0.159629	3.22124	0.00127635	0.0431066	3397	1645	2024	2063	2869.52	2387.14	1936.29	1747.95	95.69	DOWN_AtMSCtrl_UP_AtMSBc
AT1G53580	1426.06	-0.584389	0.181603	-3.21795	0.00129108	0.0434283	1542	673	1684	2141	1302.56	976.625	1611.03	1814.04	95.66	UP_AtMSCtrl_DOWN_AtMSBc
AT4G15770	559.788	0.62359	0.193764	3.2183	0.00128952	0.0434283	834	450	438	546	704.497	653.018	419.02	462.619	95.66	DOWN_AtMSCtrl_UP_AtMSBc
AT2G42600	3938.73	-0.451263	0.140275	-3.21699	0.00129544	0.0434871	3919	2305	4986	5110	3310.46	3344.9	4769.94	4329.64	95.65	UP_AtMSCtrl_DOWN_AtMSBc
AT3G50740	1854.42	-0.488068	0.152093	-3.209	0.00133198	0.0446241	1874	1036	2370	2436	1583.01	1503.39	2267.3	2063.99	95.54	UP_AtMSCtrl_DOWN_AtMSBc
AT3G15820	1008.15	0.5463	0.170301	3.20784	0.00133734	0.0447136	1499	776	890	931	1266.24	1126.09	851.433	788.824	95.53	DOWN_AtMSCtrl_UP_AtMSBc
AT2G41100	9105.83	-0.431589	0.134578	-3.20697	0.00134139	0.0447596	9340	5249	11445	11764	7889.69	7617.1	10949	9967.48	95.52	UP_AtMSCtrl_DOWN_AtMSBc
AT1G72450	1748.72	-0.529404	0.165209	-3.20446	0.00135318	0.0450627	1769	942	2375	2197	1494.31	1366.98	2272.08	1861.49	95.49	UP_AtMSCtrl_DOWN_AtMSBc
AT5G03230	225.999	0.8665	0.270961	3.19788	0.00138443	0.0460115	378	182	150	209	319.304	264.11	143.5	177.083	95.4	DOWN_AtMSCtrl_UP_AtMSBc
AT2G15960	9909.11	0.557975	0.17459	3.19592	0.00139388	0.0462097	16530	6641	8710	9092	13963.2	9637.1	8332.56	7703.53	95.38	DOWN_AtMSCtrl_UP_AtMSBc
AT3G55880	493.923	-0.676316	0.211647	-3.19549	0.00139593	0.0462097	457	258	560	802	386.037	374.397	535.733	679.524	95.38	UP_AtMSCtrl_DOWN_AtMSBc
AT2G20120	2937.98	0.447221	0.140046	3.19338	0.00140616	0.0464562	4074	2300	2604	2929	3441.39	3337.65	2491.16	2481.7	95.35	DOWN_AtMSCtrl_UP_AtMSBc
AT2G41560	8261.76	0.465631	0.145942	3.19052	0.00142018	0.0468267	10567	7058	7755	7624	8926.16	10242.2	7418.95	6459.71	95.32	DOWN_AtMSCtrl_UP_AtMSBc
AT1G22650	108.792	-1.2098	0.379639	-3.18672	0.00143898	0.0473531	94	35	139	203	79.4038	50.7903	132.977	171.999	95.26	UP_AtMSCtrl_DOWN_AtMSBc
AT4G38150	371.475	0.700389	0.220393	3.1779	0.00148344	0.0487199	504	341	296	333	425.739	494.843	283.173	282.147	95.13	DOWN_AtMSCtrl_UP_AtMSBc
AT1G55110	1391.74	-0.540189	0.17036	-3.17086	0.00151987	0.0498184	1355	774	1912	1735	1144.6	1123.19	1829.15	1470.04	95.02	UP_AtMSCtrl_DOWN_AtMSBc
AT2G01180	157.975	-0.968641	0.305609	-3.16954	0.00152681	0.0499071	126	74	197	271	106.435	107.385	188.463	229.615	95.01	UP_AtMSCtrl_DOWN_AtMSBc
AT5G11070	1399.18	0.540046	0.170404	3.16921	0.00152856	0.0499071	1893	1184	1064	1489	1599.06	1718.16	1017.89	1261.61	95.01	DOWN_AtMSCtrl_UP_AtMSBc
AT3G12280	561.494	-0.607056	0.191728	-3.16624	0.00154426	0.0502227	515	314	686	825	435.031	455.662	656.273	699.012	94.98	UP_AtMSCtrl_DOWN_AtMSBc
AT3G16420	256.047	-0.948939	0.299741	-3.16586	0.00154624	0.0502227	268	83	352	402	226.385	120.446	336.747	340.609	94.98	UP_AtMSCtrl_DOWN_AtMSBc
AT3G44670	969.725	-0.585584	0.184979	-3.16567	0.00154726	0.0502227	926	530	1062	1548	782.211	769.11	1015.98	1311.6	94.98	UP_AtMSCtrl_DOWN_AtMSBc
AT5G19250	774.221	-0.5809	0.183549	-3.16482	0.00155177	0.0502714	669	467	978	1084	565.118	677.688	935.62	918.459	94.97	UP_AtMSCtrl_DOWN_AtMSBc
AT3G30180	462.438	0.676649	0.214015	3.16169	0.00156854	0.0506182	685	385	417	370	578.634	558.693	398.93	313.496	94.94	DOWN_AtMSCtrl_UP_AtMSBc
AT5G58090	1574.96	0.508125	0.160701	3.16192	0.00156731	0.0506182	2234	1248	1469	1412	1887.11	1811.04	1405.34	1196.37	94.94	DOWN_AtMSCtrl_UP_AtMSBc
AT1G73680	364.03	-0.778305	0.246425	-3.15839	0.00158644	0.0510968	271	213	539	475	228.919	309.095	515.643	402.461	94.89	UP_AtMSCtrl_DOWN_AtMSBc
AT1G06570	9340.6	-0.456191	0.144553	-3.15587	0.00160021	0.0514412	9023	5603	12290	11628	7621.92	8130.8	11757.4	9852.25	94.86	UP_AtMSCtrl_DOWN_AtMSBc
AT1G01780	432.45	-0.7001	0.222003	-3.15357	0.00161288	0.0517486	402	220	488	713	339.578	319.253	466.853	604.116	94.83	UP_AtMSCtrl_DOWN_AtMSBc
AT5G03520	1096.73	0.519498	0.164832	3.15167	0.00162337	0.0519854	1461	931	918	1090	1234.14	1351.02	878.22	923.543	94.8	DOWN_AtMSCtrl_UP_AtMSBc
AT1G01650	612.335	-0.614799	0.195431	-3.14586	0.00165601	0.0529289	572	334	701	957	483.18	484.685	670.623	810.854	94.71	UP_AtMSCtrl_DOWN_AtMSBc
AT2G28110	141.286	-1.00617	0.320673	-3.13769	0.00170286	0.0542186	117	61	216	202	98.8323	88.5203	206.64	171.152	94.58	UP_AtMSCtrl_DOWN_AtMSBc
AT5G12470	845.938	0.536247	0.170899	3.1378	0.00170221	0.0542186	1167	701	717	820	985.789	1017.26	685.93	694.775	94.58	DOWN_AtMSCtrl_UP_AtMSBc
AT2G23610	815.156	0.570228	0.182212	3.12948	0.00175114	0.0556496	1095	706	631	835	924.969	1024.51	603.656	707.485	94.44	DOWN_AtMSCtrl_UP_AtMSBc
AT2G03530	277.592	-0.83959	0.268663	-3.12507	0.00177764	0.0563843	241	134	300	502	203.578	194.454	287	425.338	94.36	UP_AtMSCtrl_DOWN_AtMSBc
AT1G15980	1147.77	-0.573543	0.183621	-3.12351	0.00178705	0.0565259	949	721	1515	1527	801.64	1046.28	1449.35	1293.81	94.35	UP_AtMSCtrl_DOWN_AtMSBc
AT2G26080	5439.14	0.524859	0.168051	3.12321	0.00178888	0.0565259	6553	5032	5054	4820	5535.46	7302.2	4834.99	4083.92	94.35	DOWN_AtMSCtrl_UP_AtMSBc
AT2G39050	88.5174	-1.23313	0.395008	-3.12178	0.00179758	0.0565866	71	31	124	154	59.9752	44.9857	118.627	130.482	94.34	UP_AtMSCtrl_DOWN_AtMSBc
AT5G65430	6327.13	0.475386	0.152255	3.12231	0.00179439	0.0565866	9703	4494	5605	6171	8196.33	6521.48	5362.11	5228.61	94.34	DOWN_AtMSCtrl_UP_AtMSBc
AT3G07540	217.174	0.950548	0.304568	3.12097	0.00180254	0.0566359	263	242	175	151	222.162	351.179	167.417	127.94	94.34	DOWN_AtMSCtrl_UP_AtMSBc
AT4G28050	305.05	0.756926	0.243001	3.11491	0.00184002	0.0575963	405	293	252	250	342.112	425.187	241.08	211.822	94.24	DOWN_AtMSCtrl_UP_AtMSBc
AT5G41100	310.708	-0.844941	0.271226	-3.11526	0.00183782	0.0575963	201	191	444	438	169.789	277.17	424.76	371.112	94.24	UP_AtMSCtrl_DOWN_AtMSBc
AT3G19910	920.859	0.535086	0.171868	3.11336	0.00184967	0.0577901	1361	709	768	909	1149.66	1028.87	734.72	770.184	94.22	DOWN_AtMSCtrl_UP_AtMSBc
AT1G15010	210.798	-0.881026	0.28318	-3.11119	0.00186336	0.058109	205	84	286	324	173.168	121.897	273.607	274.521	94.19	UP_AtMSCtrl_DOWN_AtMSBc
AT4G19420	5191.78	-0.499729	0.16072	-3.10931	0.00187522	0.0583697	5448	2756	5604	8031	4602.04	3999.37	5361.16	6804.56	94.16	UP_AtMSCtrl_DOWN_AtMSBc
AT1G34340	372.993	-0.790852	0.254816	-3.10362	0.0019117	0.0593945	250	233	477	574	211.18	338.118	456.33	486.343	94.06	UP_AtMSCtrl_DOWN_AtMSBc
AT5G15350	301.989	0.721947	0.232771	3.10154	0.00192519	0.0597022	432	267	230	278	364.919	387.458	220.033	235.546	94.03	DOWN_AtMSCtrl_UP_AtMSBc
AT1G23130	6799.31	0.436065	0.140624	3.10093	0.00192916	0.0597145	9921	5000	6102	6755	8380.47	7255.76	5837.58	5723.42	94.03	DOWN_AtMSCtrl_UP_AtMSBc
AT5G12900	306.917	0.722576	0.233167	3.09896	0.001942	0.0600005	463	257	257	257	391.106	372.946	245.863	217.753	94	DOWN_AtMSCtrl_UP_AtMSBc
AT1G59910	459.945	-0.661624	0.213558	-3.0981	0.00194764	0.0600637	388	266	635	612	327.752	386.006	607.483	518.54	93.99	UP_AtMSCtrl_DOWN_AtMSBc
AT1G68400	817.008	0.595958	0.192422	3.09714	0.00195395	0.060135	1016	765	712	730	858.236	1110.13	681.146	618.519	93.99	DOWN_AtMSCtrl_UP_AtMSBc
AT3G19860	3181.95	0.474037	0.15308	3.09666	0.00195716	0.060135	3997	2774	2904	3007	3376.35	4025.5	2778.16	2547.79	93.99	DOWN_AtMSCtrl_UP_AtMSBc
AT3G17090	1293.97	0.497023	0.160646	3.0939	0.00197542	0.0605845	1876	995	1087	1307	1584.7	1443.9	1039.9	1107.4	93.94	DOWN_AtMSCtrl_UP_AtMSBc
AT3G19290	1061.06	-0.513192	0.165985	-3.0918	0.00198948	0.0609036	1006	620	1250	1533	849.789	899.714	1195.83	1298.89	93.91	UP_AtMSCtrl_DOWN_AtMSBc
AT5G24670	1699.96	-0.52499	0.169855	-3.09082	0.00199607	0.0609933	1510	1044	1905	2581	1275.53	1515	1822.45	2186.85	93.9	UP_AtMSCtrl_DOWN_AtMSBc
AT5G17640	402.733	0.665985	0.21604	3.08269	0.00205136	0.0625685	631	313	334	359	533.019	454.211	319.527	304.176	93.74	DOWN_AtMSCtrl_UP_AtMSBc
AT3G48320	127.967	-1.03023	0.334772	-3.07742	0.00208801	0.06357	90	64	192	188	76.0249	92.8737	183.68	159.29	93.64	UP_AtMSCtrl_DOWN_AtMSBc
AT5G23510	622.957	-0.598682	0.194632	-3.07597	0.00209818	0.0637631	619	322	723	956	522.882	467.271	691.67	810.006	93.62	UP_AtMSCtrl_DOWN_AtMSBc
AT1G57680	2899.37	0.475748	0.15488	3.07172	0.00212828	0.0645603	4323	2131	2681	2701	3651.73	3092.4	2564.82	2288.52	93.54	DOWN_AtMSCtrl_UP_AtMSBc
AT1G62660	534.191	-0.607054	0.197706	-3.07048	0.00213711	0.0647107	468	312	689	743	395.329	452.759	659.143	629.534	93.53	UP_AtMSCtrl_DOWN_AtMSBc
AT1G30720	375.847	-0.74191	0.241672	-3.06991	0.00214124	0.0647182	272	231	500	543	229.764	335.216	478.333	460.077	93.53	UP_AtMSCtrl_DOWN_AtMSBc
AT3G16240	29181.8	0.505389	0.164695	3.06863	0.00215042	0.0648781	33905	27458	25819	27784	28640.3	39845.7	24700.2	23541	93.51	DOWN_AtMSCtrl_UP_AtMSBc
AT1G28390	28.0498	-2.18861	0.713665	-3.06672	0.00216424	0.0651773	9	9	39	64	7.60249	13.0604	37.31	54.2264	93.48	UP_AtMSCtrl_DOWN_AtMSBc
AT2G39660	382.143	-0.695198	0.226738	-3.06608	0.00216887	0.065199	365	189	546	500	308.323	274.268	522.34	423.643	93.48	UP_AtMSCtrl_DOWN_AtMSBc
AT1G71340	319.917	-0.713542	0.233033	-3.06198	0.00219876	0.0659786	279	172	384	504	235.677	249.598	367.36	427.033	93.4	UP_AtMSCtrl_DOWN_AtMSBc
AT5G20230	4760.71	0.561537	0.183522	3.05977	0.00221504	0.0663479	8071	3122	4117	4433	6817.74	4530.5	3938.59	3756.02	93.37	DOWN_AtMSCtrl_UP_AtMSBc
AT1G56600	39.9762	-1.84996	0.604807	-3.05876	0.00222258	0.0664023	13	17	67	71	10.9814	24.6696	64.0966	60.1574	93.36	UP_AtMSCtrl_DOWN_AtMSBc
AT4G36500	1230.64	-0.522534	0.170854	-3.05837	0.00222544	0.0664023	1315	625	1544	1685	1110.81	906.97	1477.09	1427.68	93.36	UP_AtMSCtrl_DOWN_AtMSBc
AT5G59220	28.0131	-2.36589	0.773694	-3.05792	0.0022288	0.0664023	17	2	61	43	14.3603	2.9023	58.3566	36.4333	93.36	UP_AtMSCtrl_DOWN_AtMSBc
AT3G51830	765.824	-0.604499	0.197933	-3.05406	0.00225767	0.0671427	636	469	876	1189	537.242	680.59	838.04	1007.42	93.29	UP_AtMSCtrl_DOWN_AtMSBc
AT1G15690	10689.5	0.425078	0.13941	3.04913	0.00229506	0.068133	15267	7999	10069	10175	12896.4	11607.8	9632.67	8621.14	93.19	DOWN_AtMSCtrl_UP_AtMSBc
AT1G29470	2609.65	0.442445	0.145152	3.04815	0.00230252	0.0682331	3389	2172	2303	2621	2862.76	3151.9	2203.2	2220.74	93.18	DOWN_AtMSCtrl_UP_AtMSBc
AT1G10657	73.23	-1.30246	0.42752	-3.04654	0.00231495	0.0684798	44	33	111	120	37.1677	47.888	106.19	101.674	93.15	UP_AtMSCtrl_DOWN_AtMSBc
AT1G55310	1422.65	-0.518048	0.170171	-3.04428	0.00233235	0.0688539	1246	889	1661	2076	1052.52	1290.07	1589.02	1758.97	93.11	UP_AtMSCtrl_DOWN_AtMSBc
AT4G13770	724.529	-0.549842	0.180641	-3.04383	0.00233585	0.0688539	662	426	882	1035	559.205	618.191	843.78	876.942	93.11	UP_AtMSCtrl_DOWN_AtMSBc
AT5G43750	448.059	-0.618522	0.203313	-3.04221	0.00234848	0.0691041	421	242	566	642	355.627	351.179	541.473	543.958	93.09	UP_AtMSCtrl_DOWN_AtMSBc
AT2G25625	66.1207	-1.43528	0.472194	-3.0396	0.00236896	0.0695841	54	17	110	105	45.6149	24.6696	105.233	88.9651	93.04	UP_AtMSCtrl_DOWN_AtMSBc
AT1G60590	25.486	-2.38117	0.783691	-3.0384	0.00237838	0.0696155	15	2	46	50	12.6708	2.9023	44.0066	42.3643	93.04	UP_AtMSCtrl_DOWN_AtMSBc
AT3G23880	618.386	0.797338	0.262386	3.0388	0.00237524	0.0696155	1224	368	471	537	1033.94	534.024	450.59	454.993	93.04	DOWN_AtMSCtrl_UP_AtMSBc
AT3G29035	472.839	-0.614753	0.202373	-3.03773	0.00238368	0.0696484	456	249	621	650	385.193	361.337	594.09	550.736	93.04	UP_AtMSCtrl_DOWN_AtMSBc
AT3G14230	2865.1	0.44766	0.147453	3.03595	0.00239778	0.0698161	3866	2306	2705	2668	3265.69	3346.36	2587.78	2260.56	93.02	DOWN_AtMSCtrl_UP_AtMSBc
AT4G18730	1588.41	0.520287	0.171361	3.0362	0.00239577	0.0698161	2388	1189	1229	1694	2017.19	1725.42	1175.74	1435.3	93.02	DOWN_AtMSCtrl_UP_AtMSBc
AT1G34780	382.034	0.652708	0.21513	3.03402	0.0024132	0.0700205	576	308	316	345	486.559	446.955	302.307	292.314	93	DOWN_AtMSCtrl_UP_AtMSBc
AT5G44680	1872.97	0.594706	0.195999	3.03423	0.00241152	0.0700205	2111	1879	1599	1714	1783.21	2726.71	1529.71	1452.25	93	DOWN_AtMSCtrl_UP_AtMSBc
AT1G20090	979.78	0.573486	0.189118	3.03242	0.002426	0.0702699	1418	790	703	1065	1197.81	1146.41	672.536	902.361	92.97	DOWN_AtMSCtrl_UP_AtMSBc
AT4G26540	1216.75	0.497381	0.164451	3.0245	0.00249045	0.0720117	1631	1014	1119	1118	1377.74	1471.47	1070.51	947.267	92.8	DOWN_AtMSCtrl_UP_AtMSBc
AT1G07170	401.529	0.723179	0.239317	3.02184	0.00251243	0.0725213	698	282	300	378	589.615	409.225	287	320.274	92.75	DOWN_AtMSCtrl_UP_AtMSBc
AT2G22500	218.494	-0.798298	0.264282	-3.02063	0.00252251	0.0725612	200	103	292	326	168.944	149.469	279.347	276.216	92.74	UP_AtMSCtrl_DOWN_AtMSBc
AT3G17700	352.498	-0.67166	0.222344	-3.02082	0.00252092	0.0725612	311	194	471	490	262.708	281.523	450.59	415.171	92.74	UP_AtMSCtrl_DOWN_AtMSBc
AT5G52310	129.775	-1.0079	0.333827	-3.01922	0.00253429	0.0727747	101	60	203	180	85.3168	87.0691	194.203	152.512	92.72	UP_AtMSCtrl_DOWN_AtMSBc
AT1G20010	7027.63	0.429936	0.142503	3.01703	0.00255263	0.0730499	10012	5289	6669	6607	8457.34	7675.14	6380.01	5598.02	92.7	DOWN_AtMSCtrl_UP_AtMSBc
AT3G13080	233.682	-0.833508	0.27624	-3.01733	0.00255013	0.0730499	189	122	262	410	159.652	177.041	250.647	347.388	92.7	UP_AtMSCtrl_DOWN_AtMSBc
AT2G36220	1492.45	-0.500668	0.166017	-3.01576	0.00256335	0.0731057	1518	819	1996	1876	1282.29	1188.49	1909.51	1589.51	92.69	UP_AtMSCtrl_DOWN_AtMSBc
AT3G07230	360.554	0.708599	0.234963	3.0158	0.00256306	0.0731057	468	345	261	350	395.329	500.647	249.69	296.55	92.69	DOWN_AtMSCtrl_UP_AtMSBc
AT4G03190	423.427	0.690336	0.229022	3.01428	0.00257591	0.0733388	652	341	286	442	550.758	494.843	273.607	374.501	92.67	DOWN_AtMSCtrl_UP_AtMSBc
AT2G15480	123.46	-1.1048	0.36716	-3.00904	0.00262072	0.0744875	115	40	199	175	97.1429	58.0461	190.377	148.275	92.55	UP_AtMSCtrl_DOWN_AtMSBc
AT4G18700	2138.11	0.46057	0.153119	3.00792	0.00263045	0.0746368	3043	1641	2003	1988	2570.49	2381.34	1916.2	1684.41	92.54	DOWN_AtMSCtrl_UP_AtMSBc
AT1G04800	235.81	0.83037	0.276219	3.0062	0.00264535	0.0749322	389	189	207	168	328.596	274.268	198.03	142.344	92.51	DOWN_AtMSCtrl_UP_AtMSBc
AT1G70890	1485.67	-0.460418	0.153462	-3.00021	0.00269795	0.0762924	1497	852	1767	2067	1264.55	1236.38	1690.43	1751.34	92.37	UP_AtMSCtrl_DOWN_AtMSBc
AT2G29300	128.383	-1.06081	0.353972	-2.99687	0.00272771	0.0770035	96	59	142	249	81.0932	85.618	135.847	210.974	92.3	UP_AtMSCtrl_DOWN_AtMSBc
AT5G65020	187.52	-0.835365	0.279277	-2.99118	0.00277906	0.0783206	164	90	245	291	138.534	130.604	234.383	246.56	92.17	UP_AtMSCtrl_DOWN_AtMSBc
AT1G15410	511.473	0.592022	0.197968	2.9905	0.00278521	0.078361	751	410	447	459	634.385	594.972	427.63	388.905	92.16	DOWN_AtMSCtrl_UP_AtMSBc
AT2G06850	9575.17	0.395947	0.132431	2.98982	0.00279138	0.078361	12388	7786	8624	9781	10464.4	11298.7	8250.29	8287.31	92.16	DOWN_AtMSCtrl_UP_AtMSBc
AT4G11521	81.5153	-1.322	0.442218	-2.98947	0.00279458	0.078361	38	43	134	122	32.0994	62.3995	128.193	103.369	92.16	UP_AtMSCtrl_DOWN_AtMSBc
AT2G16586	1814.85	0.44471	0.148825	2.98814	0.00280681	0.0785719	2499	1429	1572	1854	2110.96	2073.7	1503.88	1570.87	92.14	DOWN_AtMSCtrl_UP_AtMSBc
AT1G13650	32.8986	-1.94611	0.651695	-2.98622	0.00282445	0.0789332	21	6	55	62	17.7391	8.70691	52.6166	52.5318	92.11	UP_AtMSCtrl_DOWN_AtMSBc
AT1G70310	1478.89	0.552951	0.185446	2.98174	0.00286611	0.0799636	2391	1031	1156	1527	2019.73	1496.14	1105.91	1293.81	92	DOWN_AtMSCtrl_UP_AtMSBc
AT4G37870	5818.61	0.395955	0.132871	2.97999	0.0028826	0.0802894	7919	4503	5229	5958	6689.34	6534.54	5002.41	5048.14	91.97	DOWN_AtMSCtrl_UP_AtMSBc
AT3G15060	824.401	0.608127	0.2043	2.97664	0.00291423	0.081035	1343	589	761	685	1134.46	854.728	728.023	580.391	91.9	DOWN_AtMSCtrl_UP_AtMSBc
AT5G56670	1179.11	0.490072	0.164695	2.97563	0.00292391	0.0811689	1667	928	962	1229	1408.15	1346.67	920.313	1041.32	91.88	DOWN_AtMSCtrl_UP_AtMSBc
AT3G61580	6107.22	0.436627	0.146972	2.97082	0.00297007	0.0823134	8179	4920	5935	5550	6908.97	7139.67	5677.81	4702.44	91.77	DOWN_AtMSCtrl_UP_AtMSBc
AT3G04470	1295.87	0.540733	0.182054	2.97017	0.00297631	0.0823494	2079	905	1139	1209	1756.17	1313.29	1089.64	1024.37	91.77	DOWN_AtMSCtrl_UP_AtMSBc
AT1G77210	2427.2	-0.429355	0.144742	-2.96634	0.00301366	0.0831072	2401	1454	2825	3385	2028.17	2109.97	2702.58	2868.07	91.69	UP_AtMSCtrl_DOWN_AtMSBc
AT5G26740	1060.02	0.491634	0.165734	2.96641	0.00301297	0.0831072	1493	838	965	991	1261.17	1216.07	923.183	839.661	91.69	DOWN_AtMSCtrl_UP_AtMSBc
AT1G76820	422.284	-0.63904	0.215619	-2.96375	0.00303916	0.0835342	428	205	525	623	361.54	297.486	502.25	527.86	91.65	UP_AtMSCtrl_DOWN_AtMSBc
AT3G02830	591.415	-0.590775	0.199332	-2.96377	0.00303895	0.0835342	533	341	671	919	450.236	494.843	641.923	778.657	91.65	UP_AtMSCtrl_DOWN_AtMSBc
AT5G18130	2315.39	-0.425636	0.143677	-2.96245	0.00305205	0.0837508	2358	1351	2751	3160	1991.85	1960.51	2631.79	2677.43	91.62	UP_AtMSCtrl_DOWN_AtMSBc
AT3G44310	7582.76	-0.454593	0.153482	-2.96186	0.00305782	0.0837713	8485	3876	9002	10536	7167.46	5624.66	8611.91	8927.01	91.62	UP_AtMSCtrl_DOWN_AtMSBc
AT3G15510	409.225	-0.61975	0.209382	-2.95989	0.00307745	0.0841707	376	226	519	584	317.615	327.96	496.51	494.816	91.58	UP_AtMSCtrl_DOWN_AtMSBc
AT1G78150	2905.41	0.465601	0.15743	2.95751	0.00310136	0.0846859	4424	2068	2586	2844	3737.04	3000.98	2473.94	2409.68	91.53	DOWN_AtMSCtrl_UP_AtMSBc
AT1G18710	266.98	-0.744562	0.252041	-2.95413	0.00313554	0.0854794	263	121	356	389	222.162	175.589	340.573	329.595	91.45	UP_AtMSCtrl_DOWN_AtMSBc
AT5G02760	1151.11	0.536418	0.181757	2.95129	0.00316448	0.0861276	1465	1026	1081	996	1237.52	1488.88	1034.16	843.898	91.39	DOWN_AtMSCtrl_UP_AtMSBc
AT1G17745	464.954	-0.840506	0.285124	-2.94786	0.00319986	0.0869486	534	146	632	699	451.081	211.868	604.613	592.254	91.31	UP_AtMSCtrl_DOWN_AtMSBc
AT5G39530	798.192	-0.541996	0.184122	-2.94368	0.00324331	0.087986	834	409	1040	1062	704.497	593.521	994.933	899.819	91.2	UP_AtMSCtrl_DOWN_AtMSBc
AT2G39390	460.417	0.627521	0.21328	2.94224	0.00325847	0.0882537	728	346	358	451	614.957	502.099	342.487	382.126	91.17	DOWN_AtMSCtrl_UP_AtMSBc
AT3G08760	961.768	-0.54361	0.185031	-2.93795	0.00330392	0.0890994	817	605	1129	1415	690.137	877.947	1080.08	1198.91	91.09	UP_AtMSCtrl_DOWN_AtMSBc
AT3G47580	84.4413	-1.18631	0.403879	-2.93728	0.00331105	0.0890994	54	40	134	125	45.6149	58.0461	128.193	105.911	91.09	UP_AtMSCtrl_DOWN_AtMSBc
AT5G66210	1022.78	-0.58008	0.19742	-2.93831	0.00330009	0.0890994	961	571	1057	1699	811.777	828.608	1011.2	1439.54	91.09	UP_AtMSCtrl_DOWN_AtMSBc
AT5G67470	338.591	0.75768	0.257931	2.93753	0.00330835	0.0890994	458	320	316	237	386.882	464.369	302.307	200.807	91.09	DOWN_AtMSCtrl_UP_AtMSBc
AT1G21400	3361.51	-0.428377	0.146015	-2.93379	0.00334846	0.089714	3624	1839	3957	4639	3061.27	2668.67	3785.53	3930.56	91.03	UP_AtMSCtrl_DOWN_AtMSBc
AT2G23130	511.373	0.69835	0.238137	2.93255	0.0033619	0.089714	583	534	421	443	492.472	774.915	402.756	375.348	91.03	DOWN_AtMSCtrl_UP_AtMSBc
AT3G06500	1486.77	-0.501832	0.171148	-2.93216	0.00336616	0.089714	1567	783	1655	2247	1323.68	1136.25	1583.28	1903.85	91.03	UP_AtMSCtrl_DOWN_AtMSBc
AT3G28270	157.184	-0.889249	0.303067	-2.93416	0.00334448	0.089714	140	70	206	250	118.261	101.581	197.073	211.822	91.03	UP_AtMSCtrl_DOWN_AtMSBc
AT3G51440	146.089	-0.969461	0.330546	-2.93291	0.00335807	0.089714	141	53	204	228	119.106	76.911	195.16	193.181	91.03	UP_AtMSCtrl_DOWN_AtMSBc
AT4G11650	11.2877	-3.72402	1.27004	-2.93221	0.00336562	0.089714	2	1	20	27	1.68944	1.45115	19.1333	22.8767	91.03	UP_AtMSCtrl_DOWN_AtMSBc
AT1G55810	1365.81	-0.491346	0.167611	-2.93147	0.00337362	0.0897696	1305	806	1514	2057	1102.36	1169.63	1448.39	1742.87	91.02	UP_AtMSCtrl_DOWN_AtMSBc
AT5G19760	3631.64	0.413665	0.141165	2.93036	0.00338572	0.089805	5135	2728	3192	3749	4337.64	3958.74	3053.68	3176.48	91.02	DOWN_AtMSCtrl_UP_AtMSBc
AT5G55730	67.6266	-1.36407	0.465468	-2.93054	0.00338375	0.089805	34	33	115	99	28.7205	47.888	110.017	83.8814	91.02	UP_AtMSCtrl_DOWN_AtMSBc
AT1G72410	1181.65	0.516114	0.176159	2.92982	0.00339162	0.0898186	1791	873	1098	1058	1512.89	1266.86	1050.42	896.429	91.02	DOWN_AtMSCtrl_UP_AtMSBc
AT3G12220	29.1521	1.94157	0.66298	2.92855	0.00340548	0.0900427	58	30	11	16	48.9938	43.5346	10.5233	13.5566	91	DOWN_AtMSCtrl_UP_AtMSBc
AT3G48560	10438.3	0.422275	0.144311	2.92616	0.00343178	0.0905947	13707	8498	10160	9587	11578.6	12331.9	9719.73	8122.94	90.94	DOWN_AtMSCtrl_UP_AtMSBc
AT1G35350	527.767	-0.568695	0.194446	-2.92469	0.00344802	0.0906434	490	301	647	757	413.913	436.797	618.963	641.396	90.94	UP_AtMSCtrl_DOWN_AtMSBc
AT3G20910	218.243	-0.805057	0.275248	-2.92484	0.00344634	0.0906434	171	120	320	293	144.447	174.138	306.133	248.255	90.94	UP_AtMSCtrl_DOWN_AtMSBc
AT4G25520	667.524	-0.534388	0.182727	-2.92452	0.00344993	0.0906434	622	390	831	925	525.416	565.949	794.99	783.74	90.94	UP_AtMSCtrl_DOWN_AtMSBc
AT5G48657	166.914	-0.879995	0.300989	-2.92367	0.00345928	0.0907463	147	76	250	229	124.174	110.288	239.167	194.029	90.93	UP_AtMSCtrl_DOWN_AtMSBc
AT5G48960	379.571	-0.665492	0.227768	-2.92179	0.00348026	0.0911533	322	218	438	603	272	316.351	419.02	510.914	90.88	UP_AtMSCtrl_DOWN_AtMSBc
AT1G13990	936.443	-0.601781	0.206044	-2.92065	0.00349303	0.091252	1038	419	1080	1449	876.82	608.033	1033.2	1227.72	90.87	UP_AtMSCtrl_DOWN_AtMSBc
AT1G26665	1735.49	-0.56992	0.195211	-2.9195	0.0035059	0.091252	1313	1164	2150	2463	1109.12	1689.14	2056.83	2086.87	90.87	UP_AtMSCtrl_DOWN_AtMSBc
AT2G17710	197.348	1.08749	0.372369	2.92048	0.00349497	0.091252	452	106	120	164	381.814	153.822	114.8	138.955	90.87	DOWN_AtMSCtrl_UP_AtMSBc
AT4G30270	13437.8	-0.419257	0.143595	-2.91973	0.00350333	0.091252	12405	8629	16624	17523	10478.8	12522	15903.6	14847	90.87	UP_AtMSCtrl_DOWN_AtMSBc
AT1G09620	3874.78	0.404226	0.13851	2.91839	0.00351849	0.0912948	5406	2936	3521	3899	4566.56	4260.58	3368.42	3303.57	90.87	DOWN_AtMSCtrl_UP_AtMSBc
AT3G22740	44.0565	-1.59885	0.547807	-2.91864	0.00351567	0.0912948	29	13	76	71	24.4969	18.865	72.7066	60.1574	90.87	UP_AtMSCtrl_DOWN_AtMSBc
AT2G34510	1375.55	0.48415	0.166053	2.91564	0.00354963	0.0919596	2061	1010	1242	1307	1740.97	1465.66	1188.18	1107.4	90.8	DOWN_AtMSCtrl_UP_AtMSBc
AT2G10410	2511.57	0.502976	0.172724	2.91203	0.0035909	0.0928846	3970	1746	2321	2288	3353.54	2533.71	2220.42	1938.59	90.71	DOWN_AtMSCtrl_UP_AtMSBc
AT1G69572	123.086	1.02048	0.350512	2.9114	0.00359818	0.0929287	215	102	70	113	181.615	148.017	66.9666	95.7434	90.71	DOWN_AtMSCtrl_UP_AtMSBc
AT3G12680	588.208	-0.624244	0.214886	-2.905	0.00367249	0.0947014	455	375	767	815	384.348	544.182	733.763	690.539	90.53	UP_AtMSCtrl_DOWN_AtMSBc
AT1G68460	36.568	1.73251	0.597438	2.8999	0.00373277	0.0961072	78	32	16	22	65.8882	46.4369	15.3067	18.6403	90.39	DOWN_AtMSCtrl_UP_AtMSBc
AT1G35190	360.335	-0.659847	0.227828	-2.89625	0.00377656	0.0970849	317	201	417	570	267.776	291.682	398.93	482.954	90.29	UP_AtMSCtrl_DOWN_AtMSBc
AT2G40960	286.664	-0.738217	0.254948	-2.89556	0.00378477	0.0971463	258	146	318	487	217.938	211.868	304.22	412.629	90.29	UP_AtMSCtrl_DOWN_AtMSBc
AT2G44270	216.823	0.820706	0.283654	2.89334	0.00381173	0.0974961	311	201	134	218	262.708	291.682	128.193	184.709	90.25	DOWN_AtMSCtrl_UP_AtMSBc
AT3G11660	1157.66	-0.519951	0.179671	-2.8939	0.00380484	0.0974961	986	739	1476	1550	832.895	1072.4	1412.04	1313.29	90.25	UP_AtMSCtrl_DOWN_AtMSBc
AT3G46110	70.1391	-1.29238	0.446727	-2.89299	0.00381593	0.0974961	45	30	123	96	38.0124	43.5346	117.67	81.3395	90.25	UP_AtMSCtrl_DOWN_AtMSBc
AT1G60610	140.677	-0.960504	0.332109	-2.89214	0.00382631	0.0975422	119	62	227	183	100.522	89.9714	217.163	155.053	90.25	UP_AtMSCtrl_DOWN_AtMSBc
AT3G05730	458.425	-0.812568	0.280982	-2.89188	0.00382943	0.0975422	264	307	660	630	223.006	445.504	631.4	533.791	90.25	UP_AtMSCtrl_DOWN_AtMSBc
AT4G01400	703.153	0.582924	0.201616	2.89126	0.00383701	0.0975865	1132	502	629	621	956.224	728.478	601.743	526.165	90.24	DOWN_AtMSCtrl_UP_AtMSBc
AT5G20600	554.573	0.550123	0.190343	2.89017	0.00385031	0.0977756	772	459	475	526	652.124	666.079	454.416	445.673	90.22	DOWN_AtMSCtrl_UP_AtMSBc
AT1G20450	1630.4	-0.514788	0.178186	-2.88904	0.00386416	0.0979783	1579	931	2303	1928	1333.81	1351.02	2203.2	1633.57	90.2	UP_AtMSCtrl_DOWN_AtMSBc
AT2G20340	215.474	-0.794057	0.275156	-2.88585	0.00390363	0.0988287	191	106	250	363	161.342	153.822	239.167	307.565	90.12	UP_AtMSCtrl_DOWN_AtMSBc
AT3G54680	249.969	-0.741996	0.257208	-2.88481	0.00391649	0.0989245	215	133	294	406	181.615	193.003	281.26	343.998	90.11	UP_AtMSCtrl_DOWN_AtMSBc
AT5G15230	944.357	0.488211	0.169248	2.88459	0.00391927	0.0989245	1320	751	860	885	1115.03	1089.81	822.733	749.849	90.11	DOWN_AtMSCtrl_UP_AtMSBc
AT1G05560	818.862	-0.560251	0.194313	-2.88324	0.00393611	0.0991995	685	515	1091	1069	578.634	747.343	1043.72	905.75	90.08	UP_AtMSCtrl_DOWN_AtMSBc
AT1G15180	1437.08	0.457778	0.158932	2.88034	0.00397249	0.099954	1847	1218	1262	1432	1560.2	1767.5	1207.31	1213.31	90	DOWN_AtMSCtrl_UP_AtMSBc
AT1G69523	92.8792	-1.11131	0.385885	-2.8799	0.00397803	0.099954	61	46	123	160	51.528	66.753	117.67	135.566	90	UP_AtMSCtrl_DOWN_AtMSBc
AT1G14400	2507.35	0.431437	0.150053	2.87523	0.00403729	0.100685	3563	1894	2107	2662	3009.74	2748.48	2015.7	2255.48	89.93	DOWN_AtMSCtrl_UP_AtMSBc
AT1G61100	1314.95	0.534497	0.185849	2.87598	0.00402774	0.100685	1678	1168	1274	1096	1417.44	1694.95	1218.79	928.626	89.93	DOWN_AtMSCtrl_UP_AtMSBc
AT3G29370	47.6017	1.4759	0.513019	2.87689	0.00401621	0.100685	85	47	27	29	71.8013	68.2041	25.83	24.5713	89.93	DOWN_AtMSCtrl_UP_AtMSBc
AT4G28240	2316.92	0.430666	0.149735	2.87619	0.00402513	0.100685	3092	1867	1935	2473	2611.88	2709.3	1851.15	2095.34	89.93	DOWN_AtMSCtrl_UP_AtMSBc
AT4G32340	4942.04	-0.393749	0.136926	-2.87563	0.00403219	0.100685	5104	2916	6099	6362	4311.45	4231.56	5834.71	5390.44	89.93	UP_AtMSCtrl_DOWN_AtMSBc
AT1G34030	686.568	0.6203	0.215971	2.87214	0.00407707	0.101448	1162	469	523	689	981.566	680.59	500.336	583.781	89.86	DOWN_AtMSCtrl_UP_AtMSBc
AT3G06980	1631.46	0.434239	0.151202	2.87191	0.00408005	0.101448	2271	1262	1460	1628	1918.36	1831.35	1396.73	1379.38	89.86	DOWN_AtMSCtrl_UP_AtMSBc
AT1G73600	532.714	-0.593387	0.206655	-2.87139	0.00408674	0.101463	464	316	729	688	391.95	458.564	697.41	582.933	89.85	UP_AtMSCtrl_DOWN_AtMSBc
AT1G53530	105.642	1.04754	0.365054	2.86955	0.00411053	0.1016	194	83	71	83	163.876	120.446	67.9233	70.3248	89.84	DOWN_AtMSCtrl_UP_AtMSBc
AT2G01850	6415.81	0.388131	0.13522	2.87037	0.00409992	0.1016	8310	5188	5952	6398	7019.63	7528.58	5694.08	5420.94	89.84	DOWN_AtMSCtrl_UP_AtMSBc
AT2G36390	1242.87	-0.471463	0.164279	-2.86989	0.00410616	0.1016	1186	746	1421	1803	1001.84	1082.56	1359.42	1527.66	89.84	UP_AtMSCtrl_DOWN_AtMSBc
AT1G66880	504.119	-0.744147	0.259421	-2.86849	0.0041243	0.10179	574	183	699	705	484.87	265.561	668.71	597.337	89.82	UP_AtMSCtrl_DOWN_AtMSBc
AT3G16570	3495.93	0.400643	0.139849	2.86483	0.00417227	0.102821	4886	2638	3159	3548	4127.31	3828.14	3022.11	3006.17	89.72	DOWN_AtMSCtrl_UP_AtMSBc
AT1G27760	481.714	-0.580673	0.202819	-2.86301	0.00419642	0.103264	475	255	634	648	401.242	370.044	606.526	549.042	89.67	UP_AtMSCtrl_DOWN_AtMSBc
AT4G34410	9.89311	-4.24145	1.48449	-2.85717	0.00427438	0.105028	2	0	21	21	1.68944	0	20.09	17.793	89.5	UP_AtMSCtrl_DOWN_AtMSBc
AT5G48810	2405.94	0.452004	0.158232	2.85658	0.00428229	0.105067	3631	1716	2125	2400	3067.18	2490.18	2032.92	2033.49	89.49	DOWN_AtMSCtrl_UP_AtMSBc
AT5G11610	499.203	-0.621964	0.217912	-2.8542	0.00431456	0.105704	419	299	704	632	353.938	433.894	673.493	535.485	89.43	UP_AtMSCtrl_DOWN_AtMSBc
AT1G07050	596.052	-0.549114	0.192439	-2.85345	0.00432473	0.105797	600	317	781	791	506.832	460.015	747.156	670.204	89.42	UP_AtMSCtrl_DOWN_AtMSBc
AT3G26910	332.808	-0.762554	0.267288	-2.85293	0.00433185	0.105816	220	214	444	484	185.839	310.546	424.76	410.087	89.42	UP_AtMSCtrl_DOWN_AtMSBc
AT1G27695	41.5088	1.72384	0.604633	2.85105	0.00435748	0.106287	84	39	11	33	70.9565	56.5949	10.5233	27.9605	89.37	DOWN_AtMSCtrl_UP_AtMSBc
AT5G17710	1258.3	0.456743	0.160301	2.84928	0.00438186	0.106726	1710	1011	1162	1192	1444.47	1467.11	1111.65	1009.97	89.33	DOWN_AtMSCtrl_UP_AtMSBc
AT5G02020	364.414	-0.704624	0.247453	-2.84751	0.00440628	0.107164	389	154	440	572	328.596	223.477	420.933	484.648	89.28	UP_AtMSCtrl_DOWN_AtMSBc
AT4G30950	6070.18	0.388591	0.136534	2.84611	0.00442563	0.107478	8507	4533	5609	6079	7186.04	6578.07	5365.94	5150.66	89.25	DOWN_AtMSCtrl_UP_AtMSBc
AT1G58270	202.435	-0.774267	0.272183	-2.84465	0.00444597	0.107815	172	106	253	317	145.292	153.822	242.037	268.59	89.22	UP_AtMSCtrl_DOWN_AtMSBc
AT1G74100	438.901	-0.581991	0.204662	-2.84367	0.00445976	0.107992	415	243	543	629	350.559	352.63	519.47	532.943	89.2	UP_AtMSCtrl_DOWN_AtMSBc
AT2G25210	141.348	0.917059	0.322622	2.84252	0.00447584	0.108225	248	110	98	121	209.491	159.627	93.7533	102.522	89.18	DOWN_AtMSCtrl_UP_AtMSBc
AT5G07840	50.8021	-5.46512	1.92402	-2.84047	0.00450468	0.108764	5	0	177	35	4.2236	0	169.33	29.655	89.12	UP_AtMSCtrl_DOWN_AtMSBc
AT2G03730	973.008	-0.479004	0.16889	-2.83619	0.00456548	0.110073	1011	531	1194	1328	854.013	770.562	1142.26	1125.2	88.99	UP_AtMSCtrl_DOWN_AtMSBc
AT5G02810	2320.97	-0.483359	0.170468	-2.83548	0.00457567	0.110159	2012	1499	2610	3437	1699.58	2175.28	2496.9	2912.12	88.98	UP_AtMSCtrl_DOWN_AtMSBc
AT1G14740	5319.66	0.44499	0.157289	2.82911	0.00466772	0.111936	7753	3939	5221	4743	6549.12	5716.09	4994.75	4018.68	88.81	DOWN_AtMSCtrl_UP_AtMSBc
AT3G10520	659.832	0.576581	0.203812	2.82899	0.00466958	0.111936	1071	464	570	609	904.696	673.334	545.3	515.998	88.81	DOWN_AtMSCtrl_UP_AtMSBc
AT5G44720	415.979	-0.641961	0.226864	-2.82972	0.00465889	0.111936	442	189	538	592	373.367	274.268	514.686	501.594	88.81	UP_AtMSCtrl_DOWN_AtMSBc
AT1G53480	713.684	0.623866	0.220665	2.82722	0.00469546	0.112395	1243	468	577	677	1049.99	679.139	551.996	573.613	88.76	DOWN_AtMSCtrl_UP_AtMSBc
AT1G14330	175.749	0.898052	0.318092	2.82325	0.00475398	0.113632	290	146	159	111	244.969	211.868	152.11	94.0488	88.64	DOWN_AtMSCtrl_UP_AtMSBc
AT1G07300	61.4624	-1.33748	0.474039	-2.82145	0.00478072	0.113955	32	30	92	103	27.0311	43.5346	88.0133	87.2705	88.6	UP_AtMSCtrl_DOWN_AtMSBc
AT3G29390	888.476	-0.618605	0.219253	-2.82142	0.00478112	0.113955	645	593	1044	1357	544.845	860.533	998.76	1149.77	88.6	UP_AtMSCtrl_DOWN_AtMSBc
AT5G40740	681.476	0.533196	0.189082	2.81992	0.00480355	0.114326	914	579	630	603	772.075	840.217	602.7	510.914	88.57	DOWN_AtMSCtrl_UP_AtMSBc
AT1G68670	2124.14	-0.428222	0.151894	-2.81921	0.0048142	0.114416	2171	1232	2715	2688	1833.89	1787.82	2597.35	2277.51	88.56	UP_AtMSCtrl_DOWN_AtMSBc
AT4G10840	2212.1	0.490357	0.174023	2.81778	0.00483577	0.114765	3057	1782	2219	1838	2582.31	2585.95	2122.84	1557.31	88.52	DOWN_AtMSCtrl_UP_AtMSBc
AT4G37240	136.847	0.911101	0.323955	2.81243	0.00491689	0.116359	227	114	89	124	191.752	165.431	85.1433	105.064	88.36	DOWN_AtMSCtrl_UP_AtMSBc
AT5G13260	528.895	0.566888	0.201553	2.8126	0.00491423	0.116359	760	428	404	550	641.988	621.093	386.493	466.008	88.36	DOWN_AtMSCtrl_UP_AtMSBc
AT5G20570	674.784	0.54622	0.194286	2.81142	0.00493237	0.11656	1046	494	602	617	883.578	716.869	575.913	522.776	88.34	DOWN_AtMSCtrl_UP_AtMSBc
AT5G28237	16.7957	-2.70875	0.963825	-2.81042	0.00494766	0.116756	4	4	19	47	3.37888	5.80461	18.1767	39.8225	88.32	UP_AtMSCtrl_DOWN_AtMSBc
AT1G62540	31.3777	-1.86412	0.663513	-2.80946	0.0049624	0.116804	12	12	59	49	10.1366	17.4138	56.4433	41.5171	88.32	UP_AtMSCtrl_DOWN_AtMSBc
AT3G47000	928.437	0.504166	0.179458	2.80938	0.00496367	0.116804	1407	681	767	948	1188.52	988.234	733.763	803.228	88.32	DOWN_AtMSCtrl_UP_AtMSBc
AT4G39950	146.214	-0.903721	0.321814	-2.80821	0.00498174	0.117064	129	65	173	255	108.969	94.3249	165.503	216.058	88.29	UP_AtMSCtrl_DOWN_AtMSBc
AT1G13360	837.2	-0.507144	0.180653	-2.80729	0.00499599	0.117234	878	441	974	1222	741.665	639.958	931.793	1035.38	88.28	UP_AtMSCtrl_DOWN_AtMSBc
AT1G34430	1430.25	0.432122	0.153958	2.80675	0.00500437	0.117265	1918	1148	1261	1450	1620.17	1665.92	1206.36	1228.57	88.27	DOWN_AtMSCtrl_UP_AtMSBc
AT4G14130	394.116	0.65774	0.23443	2.80569	0.00502084	0.117486	568	334	374	300	479.801	484.685	357.793	254.186	88.25	DOWN_AtMSCtrl_UP_AtMSBc
AT3G16250	525.212	-0.557597	0.198815	-2.80461	0.00503781	0.117718	470	313	634	759	397.019	454.211	606.526	643.091	88.23	UP_AtMSCtrl_DOWN_AtMSBc
AT5G55970	375.071	-0.609541	0.217388	-2.80393	0.00504842	0.117801	369	194	469	541	311.702	281.523	448.676	458.382	88.22	UP_AtMSCtrl_DOWN_AtMSBc
AT2G40970	468.139	0.584868	0.208678	2.80273	0.00506713	0.118073	603	424	385	448	509.367	615.288	368.317	379.585	88.19	DOWN_AtMSCtrl_UP_AtMSBc
AT1G34010	175.158	0.899515	0.321093	2.80141	0.00508794	0.118312	306	136	100	176	258.485	197.357	95.6666	149.122	88.17	DOWN_AtMSCtrl_UP_AtMSBc
AT5G04900	301.769	-0.687272	0.245351	-2.80118	0.00509158	0.118312	281	155	341	494	237.367	224.929	326.223	418.56	88.17	UP_AtMSCtrl_DOWN_AtMSBc
AT4G21990	139.833	-0.926048	0.330932	-2.79831	0.00513712	0.119204	123	61	163	249	103.901	88.5203	155.937	210.974	88.08	UP_AtMSCtrl_DOWN_AtMSBc
AT2G17880	756.999	0.491408	0.175776	2.79565	0.00517953	0.120021	1072	595	658	743	905.541	863.435	629.486	629.534	88	DOWN_AtMSCtrl_UP_AtMSBc
AT2G02570	1080.19	-0.46937	0.168086	-2.79243	0.00523133	0.120886	1055	635	1225	1577	891.18	921.481	1171.92	1336.17	87.91	UP_AtMSCtrl_DOWN_AtMSBc
AT3G50560	138.99	0.953768	0.34154	2.79255	0.00522942	0.120886	174	152	88	123	146.981	220.575	84.1866	104.216	87.91	DOWN_AtMSCtrl_UP_AtMSBc
AT2G38170	5939.45	0.413454	0.148094	2.79184	0.00524095	0.120941	8815	4218	5247	6103	7446.21	6120.96	5019.63	5170.99	87.91	DOWN_AtMSCtrl_UP_AtMSBc
AT3G05210	655.355	-0.511959	0.183419	-2.79121	0.00525121	0.12101	617	386	803	911	521.193	560.145	768.203	771.878	87.9	UP_AtMSCtrl_DOWN_AtMSBc
AT4G32250	498.523	-0.552084	0.197865	-2.79021	0.00526739	0.121215	491	271	634	684	414.758	393.262	606.526	579.544	87.88	UP_AtMSCtrl_DOWN_AtMSBc
AT5G27350	892.856	-0.500803	0.179548	-2.78924	0.0052832	0.121412	793	559	1070	1259	669.864	811.194	1023.63	1066.73	87.86	UP_AtMSCtrl_DOWN_AtMSBc
AT1G18620	2588.83	0.399603	0.143296	2.78865	0.00529284	0.121466	3562	1985	2392	2570	3008.9	2880.54	2288.35	2177.53	87.85	DOWN_AtMSCtrl_UP_AtMSBc
AT1G22070	388.661	-0.610652	0.219025	-2.78804	0.00530275	0.121526	392	195	473	576	331.131	282.975	452.503	488.037	87.85	UP_AtMSCtrl_DOWN_AtMSBc
AT1G64200	91.6189	-1.10686	0.397378	-2.7854	0.00534613	0.12181	83	31	137	142	70.1118	44.9857	131.063	120.315	87.82	UP_AtMSCtrl_DOWN_AtMSBc
AT2G19810	877.023	-0.52439	0.188272	-2.78527	0.00534825	0.12181	963	429	1081	1225	813.466	622.544	1034.16	1037.93	87.82	UP_AtMSCtrl_DOWN_AtMSBc
AT3G02700	1061.28	0.499339	0.179292	2.78507	0.00535164	0.12181	1629	764	873	1092	1376.05	1108.68	835.17	925.237	87.82	DOWN_AtMSCtrl_UP_AtMSBc
AT3G13200	1447.71	0.471219	0.169118	2.78633	0.0053309	0.12181	2202	1035	1306	1392	1860.08	1501.94	1249.41	1179.42	87.82	DOWN_AtMSCtrl_UP_AtMSBc
AT3G19000	257.566	-0.697907	0.250477	-2.78631	0.00533121	0.12181	251	124	328	383	212.025	179.943	313.787	324.511	87.82	UP_AtMSCtrl_DOWN_AtMSBc
[truncated: 15,951 more rows]

## Sheet: AtC32IvsAtC32IBc
baseMean	log2FoldChange	lfcSE	stat	pvalue	padj	AtC32I_1	AtC32I_2	AtC32IBc_1	AtC32IBc_2	AtC32I_1.1	AtC32I_2.1	AtC32IBc_1.1	AtC32IBc_2.1	Certeza	DE
[truncated: 16,899 more rows]

[truncated: 1 more sheets: AtMSBcvsAtC32IBc]
