# Supplementary material for: Amphibian skin bacteria display antifungal activity and induce plant defense mechanisms against Botrytis cinerea
Source: Front Plant Sci. 2024 Apr 9;15:1392637. doi: 10.3389/fpls.2024.1392637 (PMC11035788; doi:10.3389/fpls.2024.1392637)
Supplement: Supplementary Data Sheet 2 — List of differentially expressed genes [DEGs] in the bipartite and tripartite interactions [up-regulated and down-regulated], associated to . [file Table_2.xlsx]

## Sheet: AtMSCtrl-vs-AtMSBc-UP
	baseMean	log2FoldChange	lfcSE	stat	pvalue	padj	AtMSBc_1	AtMSBc_2	AtMSCtrl_1	AtMSCtrl_2	AtMSBc_1.1	AtMSBc_2.1	AtMSCtrl_1.1	AtMSCtrl_2.1	Certeza	DE	Regulation_Type
AT1G67330	36.1546	8.76565	1.5504	5.65378	1.56955e-08	3.49151e-06	75	56	0	0	63.3541	81.2645	0	0	100	DOWN_AtMSCtrl_UP_AtMSBc	UP
AT1G15550	76.7942	2.27742	0.465121	4.89641	9.76055e-07	0.00012139	106	114	28	30	89.5404	165.431	26.7867	25.4186	99.99	DOWN_AtMSCtrl_UP_AtMSBc	UP
AT5G18840	48.6308	2.73348	0.561154	4.87117	1.10937e-06	0.000133156	80	70	15	13	67.5777	101.581	14.35	11.0147	99.99	DOWN_AtMSCtrl_UP_AtMSBc	UP
AT5G14820	17.1541	7.69406	1.65303	4.65452	3.24736e-06	0.000345089	40	24	0	0	33.7888	34.8276	0	0	99.97	DOWN_AtMSCtrl_UP_AtMSBc	UP
AT3G13710	17.0621	7.68936	1.65464	4.64715	3.36556e-06	0.000350944	43	22	0	0	36.323	31.9253	0	0	99.96	DOWN_AtMSCtrl_UP_AtMSBc	UP
AT4G38825	48.4958	2.12856	0.604438	3.52156	0.000429022	0.0193454	87	58	30	9	73.4907	84.1668	28.7	7.62558	98.07	DOWN_AtMSCtrl_UP_AtMSBc	UP

## Sheet: AtMSCtrl-vs-AtMSBc-DOWN
	baseMean	log2FoldChange	lfcSE	stat	pvalue	padj	AtMSBc_1	AtMSBc_2	AtMSCtrl_1	AtMSCtrl_2	AtMSBc_1.1	AtMSBc_2.1	AtMSCtrl_1.1	AtMSCtrl_2.1	Certeza	DE	Regulation_Type
AT5G44420	696.423	-3.89068	0.22305	-17.4431	3.88758e-68	6.48604e-64	87	73	1317	1589	73.4907	105.934	1259.93	1346.34	100	UP_AtMSCtrl_DOWN_AtMSBc	DOWN
AT5G44430	350.072	-4.54162	0.29686	-15.2989	7.78076e-53	6.49071e-49	29	24	679	816	24.4969	34.8276	649.576	691.386	100	UP_AtMSCtrl_DOWN_AtMSBc	DOWN
AT3G25770	1174.96	-2.01237	0.171017	-11.7671	5.76599e-32	1.924e-28	512	347	1899	2298	432.497	503.55	1816.71	1947.07	100	UP_AtMSCtrl_DOWN_AtMSBc	DOWN
AT3G28220	643.058	-2.28251	0.195262	-11.6895	1.44288e-31	4.01216e-28	252	156	1173	1193	212.87	226.38	1122.17	1010.81	100	UP_AtMSCtrl_DOWN_AtMSBc	DOWN
AT2G26020	158.897	-3.1998	0.358273	-8.9312	4.21425e-19	5.02219e-16	28	28	281	357	23.6522	40.6322	268.823	302.481	100	UP_AtMSCtrl_DOWN_AtMSBc	DOWN
AT2G39330	132.73	-2.96034	0.37482	-7.89805	2.83304e-15	2.25079e-12	30	25	216	310	25.3416	36.2788	206.64	262.659	100	UP_AtMSCtrl_DOWN_AtMSBc	DOWN
AT3G55970	134.642	-2.78708	0.414861	-6.71811	1.84101e-11	7.49158e-09	22	36	256	263	18.5839	52.2415	244.907	222.836	100	UP_AtMSCtrl_DOWN_AtMSBc	DOWN
AT1G72520	145.046	-2.21296	0.3385	-6.53754	6.25393e-11	2.22001e-08	66	32	280	248	55.7516	46.4369	267.867	210.127	100	UP_AtMSCtrl_DOWN_AtMSBc	DOWN
AT3G09260	51.3816	-4.59274	0.720933	-6.37054	1.8836e-10	6.04346e-08	7	1	123	95	5.91305	1.45115	117.67	80.4923	100	UP_AtMSCtrl_DOWN_AtMSBc	DOWN
AT1G52890	116.019	-2.32233	0.379014	-6.12729	8.93912e-10	2.48567e-07	54	21	224	205	45.6149	30.4742	214.293	173.694	100	UP_AtMSCtrl_DOWN_AtMSBc	DOWN
AT1G54020	42.9113	-5.31349	0.929042	-5.71933	1.06947e-08	2.47819e-06	3	1	123	59	2.53416	1.45115	117.67	49.9899	100	UP_AtMSCtrl_DOWN_AtMSBc	DOWN
AT3G44300	114.752	-2.29047	0.405853	-5.64359	1.66543e-08	3.65605e-06	31	37	174	251	26.1863	53.6926	166.46	212.669	100	UP_AtMSCtrl_DOWN_AtMSBc	DOWN
AT3G44860	57.2117	-3.07096	0.550996	-5.57347	2.49714e-08	5.14349e-06	19	5	113	115	16.0497	7.25576	108.103	97.438	100	UP_AtMSCtrl_DOWN_AtMSBc	DOWN
AT1G24070	45.3187	-3.38682	0.637309	-5.31425	1.071e-07	1.75181e-05	6	8	95	87	5.06832	11.6092	90.8833	73.714	100	UP_AtMSCtrl_DOWN_AtMSBc	DOWN
AT4G01080	70.9651	-2.59316	0.490784	-5.2837	1.26598e-07	2.03093e-05	28	11	157	111	23.6522	15.9627	150.197	94.0488	100	UP_AtMSCtrl_DOWN_AtMSBc	DOWN
AT2G26010	367.785	-3.11679	0.603423	-5.16518	2.40211e-07	3.48494e-05	127	30	653	821	107.28	43.5346	624.703	695.623	100	UP_AtMSCtrl_DOWN_AtMSBc	DOWN
AT1G68620	48.1725	-2.77319	0.575342	-4.82007	1.43509e-06	0.000167434	18	6	79	110	15.205	8.70691	75.5766	93.2016	99.98	UP_AtMSCtrl_DOWN_AtMSBc	DOWN
AT2G39250	49.978	-2.61042	0.561223	-4.65131	3.29832e-06	0.000346095	12	13	83	108	10.1366	18.865	79.4033	91.507	99.97	UP_AtMSCtrl_DOWN_AtMSBc	DOWN
AT1G28370	61.4096	-2.29086	0.506875	-4.51958	6.19613e-06	0.000594116	31	10	123	103	26.1863	14.5115	117.67	87.2705	99.94	UP_AtMSCtrl_DOWN_AtMSBc	DOWN
AT5G24150	54.1575	-2.19589	0.518722	-4.23327	2.30314e-05	0.00177077	25	12	79	121	21.118	17.4138	75.5766	102.522	99.82	UP_AtMSCtrl_DOWN_AtMSBc	DOWN
AT1G54010	37.0534	-2.55193	0.625378	-4.08062	4.49152e-05	0.00305863	12	8	64	77	10.1366	11.6092	61.2266	65.2411	99.69	UP_AtMSCtrl_DOWN_AtMSBc	DOWN
AT1G31485	11.8624	-6.86238	1.74262	-3.93797	8.21741e-05	0.00501926	0	0	31	21	0	0	29.6567	17.793	99.5	UP_AtMSCtrl_DOWN_AtMSBc	DOWN
AT1G79680	35.9591	-2.80347	0.714435	-3.92405	8.70744e-05	0.00526359	11	6	35	109	9.29193	8.70691	33.4833	92.3543	99.47	UP_AtMSCtrl_DOWN_AtMSBc	DOWN
AT3G31161	30.1633	-2.90575	0.747242	-3.88863	0.000100811	0.00592226	11	3	72	45	9.29193	4.35346	68.88	38.1279	99.41	UP_AtMSCtrl_DOWN_AtMSBc	DOWN
AT1G72260	22.1894	-3.60822	0.947565	-3.80788	0.000140161	0.0077948	7	0	37	56	5.91305	0	35.3967	47.4481	99.22	UP_AtMSCtrl_DOWN_AtMSBc	DOWN
AT1G03820	40.4564	-2.23411	0.592913	-3.76802	0.000164545	0.00882723	15	11	79	68	12.6708	15.9627	75.5766	57.6155	99.12	UP_AtMSCtrl_DOWN_AtMSBc	DOWN
AT2G17740	43.4314	-2.17602	0.58485	-3.72064	0.000198719	0.0104588	14	14	86	70	11.8261	20.3161	82.2733	59.3101	98.95	UP_AtMSCtrl_DOWN_AtMSBc	DOWN
AT2G45220	25.8121	-3.01552	0.821306	-3.67161	0.000241024	0.0123731	8	3	29	76	6.75777	4.35346	27.7433	64.3938	98.76	UP_AtMSCtrl_DOWN_AtMSBc	DOWN
AT1G61120	25.9426	-2.84811	0.777367	-3.6638	0.000248505	0.0126791	8	4	36	67	6.75777	5.80461	34.44	56.7682	98.73	UP_AtMSCtrl_DOWN_AtMSBc	DOWN
AT1G76790	30.7562	-2.64555	0.739629	-3.57687	0.000347734	0.0164818	7	8	35	85	5.91305	11.6092	33.4833	72.0194	98.35	UP_AtMSCtrl_DOWN_AtMSBc	DOWN
AT1G56240	17.7259	-3.52392	1.01762	-3.4629	0.000534385	0.0232035	2	3	43	28	1.68944	4.35346	41.1366	23.724	97.68	UP_AtMSCtrl_DOWN_AtMSBc	DOWN
AT4G12490	20.3472	-2.91693	0.874112	-3.33702	0.000846832	0.0325542	6	3	46	33	5.06832	4.35346	44.0066	27.9605	96.74	UP_AtMSCtrl_DOWN_AtMSBc	DOWN
AT5G65600	20.0167	-3.01182	0.915516	-3.28975	0.00100275	0.036769	8	1	45	34	6.75777	1.45115	43.05	28.8078	96.32	UP_AtMSCtrl_DOWN_AtMSBc	DOWN
AT4G13410	15.9409	-3.44075	1.0468	-3.28692	0.00101289	0.0370592	3	2	22	44	2.53416	2.9023	21.0467	37.2806	96.29	UP_AtMSCtrl_DOWN_AtMSBc	DOWN

## Sheet: AtMSCtrl-vs-AtC32I-UP
	baseMean	log2FoldChange	lfcSE	stat	pvalue	padj	AtC32I_1	AtC32I_2	AtMSCtrl_1	AtMSCtrl_2	AtC32I_1.1	AtC32I_2.1	AtMSCtrl_1.1	AtMSCtrl_2.1	Certeza	DE	Regulation_Type
AT3G22231	4315.99	4.21932	0.245285	17.2017	2.58e-66	4.39e-62	10684	6576	406	459	9663.79	6720.53	440.524	439.125	100	DOWN_AtMSCtrl_UP_AtC32I	UP
AT3G22235	3658.1	3.91888	0.230496	17.0019	7.95e-65	6.76e-61	8281	6101	381	516	7490.26	6235.09	413.398	493.657	100	DOWN_AtMSCtrl_UP_AtC32I	UP
AT2G14560	1847.81	3.63079	0.237414	15.2931	8.51e-53	3.62e-49	4177	2995	263	279	3778.14	3060.83	285.364	266.919	100	DOWN_AtMSCtrl_UP_AtC32I	UP
AT3G19710	1095.39	3.81756	0.301555	12.6595	9.91e-37	1.53e-33	2866	1467	120	167	2592.33	1499.24	130.204	159.769	100	DOWN_AtMSCtrl_UP_AtC32I	UP
AT5G11740	5557.7	2.52486	0.216602	11.6567	2.12e-31	1.72e-28	11325	8509	1574	1655	10243.6	8696.02	1707.84	1583.34	100	DOWN_AtMSCtrl_UP_AtC32I	UP
AT4G30650	858.088	2.84157	0.252748	11.2427	2.52e-29	1.71e-26	1796	1358	179	236	1624.5	1387.85	194.221	225.781	100	DOWN_AtMSCtrl_UP_AtC32I	UP
AT4G13770	3313.71	2.53785	0.226944	11.1827	4.96e-29	3.12e-26	6982	4885	882	1035	6315.3	4992.37	957.001	990.183	100	DOWN_AtMSCtrl_UP_AtC32I	UP
AT2G43550	1205.15	2.55985	0.234358	10.9228	8.97e-28	5.08e-25	2330	1971	301	389	2107.51	2014.32	326.595	372.156	100	DOWN_AtMSCtrl_UP_AtC32I	UP
AT1G78370	514.346	3.19412	0.292639	10.9149	9.78e-28	5.37e-25	1153	794	106	92	1042.9	811.451	115.014	88.0163	100	DOWN_AtMSCtrl_UP_AtC32I	UP
AT3G58990	532.017	3.65953	0.338763	10.8026	3.35e-27	1.67e-24	1384	705	58	97	1251.84	720.495	62.932	92.7998	100	DOWN_AtMSCtrl_UP_AtC32I	UP
AT2G41090	3002.43	2.39826	0.225353	10.6423	1.89e-26	8.48e-24	6180	4408	877	1007	5589.88	4504.88	951.575	963.396	100	DOWN_AtMSCtrl_UP_AtC32I	UP
AT5G64310	467.233	3.0044	0.289245	10.387	2.84e-25	1.16e-22	890	838	111	91	805.015	856.418	120.439	87.0596	100	DOWN_AtMSCtrl_UP_AtC32I	UP
AT3G54600	1242.38	2.45531	0.239342	10.2586	1.08e-24	3.92e-22	2533	1871	335	421	2291.13	1912.12	363.487	402.77	100	DOWN_AtMSCtrl_UP_AtC32I	UP
AT1G32080	2827.53	2.36156	0.231989	10.1796	2.44e-24	8.32e-22	5790	4140	778	1043	5237.12	4230.99	844.157	997.837	100	DOWN_AtMSCtrl_UP_AtC32I	UP
AT3G02020	531.575	3.66857	0.362999	10.1063	5.18e-24	1.66e-21	1497	604	67	86	1354.05	617.275	72.6973	82.2761	100	DOWN_AtMSCtrl_UP_AtC32I	UP
AT1G16410	786.722	3.74945	0.372457	10.0668	7.74e-24	2.38e-21	2324	809	111	102	2102.08	826.781	120.439	97.5833	100	DOWN_AtMSCtrl_UP_AtC32I	UP
AT5G38980	3197.78	2.32549	0.23101	10.0666	7.76e-24	2.38e-21	6679	4523	960	1135	6041.23	4622.41	1041.63	1085.85	100	DOWN_AtMSCtrl_UP_AtC32I	UP
AT5G50915	333.657	3.1942	0.317335	10.0657	7.83e-24	2.38e-21	572	671	63	66	517.38	685.748	68.3572	63.1421	100	DOWN_AtMSCtrl_UP_AtC32I	UP
AT1G24147	374.524	3.31268	0.331066	10.0061	1.43e-23	4.13e-21	886	548	51	85	801.397	560.044	55.3368	81.3194	100	DOWN_AtMSCtrl_UP_AtC32I	UP
AT2G46650	444.114	3.08948	0.315256	9.79989	1.13e-22	3.04e-20	1026	647	102	80	928.028	661.22	110.674	76.5359	100	DOWN_AtMSCtrl_UP_AtC32I	UP
AT2G40750	343.444	3.13267	0.320056	9.78788	1.27e-22	3.37e-20	796	502	68	70	719.991	513.033	73.7824	66.9689	100	DOWN_AtMSCtrl_UP_AtC32I	UP
AT1G19960	385.067	2.83468	0.295008	9.60881	7.34e-22	1.86e-19	761	648	99	86	688.333	662.242	107.418	82.2761	100	DOWN_AtMSCtrl_UP_AtC32I	UP
AT1G19150	1996.68	2.1155	0.224892	9.40671	5.12e-21	1.13e-18	3867	2927	704	767	3497.74	2991.33	763.864	733.788	100	DOWN_AtMSCtrl_UP_AtC32I	UP
AT5G45680	888.014	2.24975	0.241368	9.32081	1.15e-20	2.42e-18	1644	1417	267	342	1487.02	1448.14	289.704	327.191	100	DOWN_AtMSCtrl_UP_AtC32I	UP
AT3G05880	1357.55	2.27574	0.244954	9.29045	1.54e-20	3.11e-18	2519	2175	365	557	2278.46	2222.8	396.038	532.881	100	DOWN_AtMSCtrl_UP_AtC32I	UP
AT5G08760	294.224	3.1737	0.344794	9.20463	3.43e-20	6.48e-18	625	484	39	78	565.319	494.638	42.3164	74.6225	100	DOWN_AtMSCtrl_UP_AtC32I	UP
AT5G19240	1164.85	2.32232	0.253975	9.14386	6.03e-20	1.1e-17	2469	1614	379	382	2233.24	1649.47	411.228	365.459	100	DOWN_AtMSCtrl_UP_AtC32I	UP
AT2G30766	171.604	3.52188	0.385325	9.14002	6.24e-20	1.13e-17	332	324	26	28	300.298	331.121	28.2109	26.7876	100	DOWN_AtMSCtrl_UP_AtC32I	UP
AT1G14880	762.889	2.45931	0.269945	9.11041	8.21e-20	1.45e-17	1194	1470	205	258	1079.99	1502.31	222.432	246.828	100	DOWN_AtMSCtrl_UP_AtC32I	UP
AT2G43100	241.729	3.43905	0.38072	9.03302	1.67e-19	2.87e-17	617	320	41	39	558.083	327.033	44.4864	37.3113	100	DOWN_AtMSCtrl_UP_AtC32I	UP
AT3G48520	147.177	3.80013	0.431119	8.81459	1.2e-18	1.79e-16	264	304	15	24	238.791	310.682	16.2755	22.9608	100	DOWN_AtMSCtrl_UP_AtC32I	UP
AT1G30260	427.996	2.49015	0.284631	8.74872	2.16e-18	3.11e-16	841	678	105	151	760.694	692.902	113.929	144.462	100	DOWN_AtMSCtrl_UP_AtC32I	UP
AT3G02730	2670.2	2.16433	0.249342	8.68015	3.95e-18	5.56e-16	4441	4615	735	1202	4016.93	4716.43	797.5	1149.95	100	DOWN_AtMSCtrl_UP_AtC32I	UP
AT2G22500	880.158	2.20135	0.256039	8.59774	8.13e-18	1.11e-15	1377	1611	292	326	1245.51	1646.41	316.83	311.884	100	DOWN_AtMSCtrl_UP_AtC32I	UP
AT1G55330	901.537	2.15451	0.250768	8.59164	8.57e-18	1.16e-15	1441	1606	316	333	1303.4	1641.3	342.871	318.581	100	DOWN_AtMSCtrl_UP_AtC32I	UP
AT1G14150	1945.73	2.06782	0.241602	8.55879	1.14e-17	1.52e-15	3137	3373	605	880	2837.45	3447.13	656.446	841.895	100	DOWN_AtMSCtrl_UP_AtC32I	UP
AT3G13520	659.481	2.16439	0.255863	8.45917	2.69e-17	3.35e-15	1102	1135	231	241	996.771	1159.95	250.643	230.564	100	DOWN_AtMSCtrl_UP_AtC32I	UP
AT1G31580	31310.3	2.50389	0.296692	8.43937	3.19e-17	3.86e-15	79472	33843	8793	9648	71883.3	34586.8	9540.71	9230.23	100	DOWN_AtMSCtrl_UP_AtC32I	UP
AT4G39940	806.028	2.1484	0.254934	8.42731	3.54e-17	4.18e-15	1619	1141	287	295	1464.4	1166.08	311.405	282.226	100	DOWN_AtMSCtrl_UP_AtC32I	UP
AT4G12030	253.779	3.66126	0.437819	8.3625	6.14e-17	7.15e-15	733	272	26	48	663.007	277.978	28.2109	45.9215	100	DOWN_AtMSCtrl_UP_AtC32I	UP
AT4G37800	1577.24	2.00674	0.243075	8.25562	1.51e-16	1.64e-14	2397	2822	557	682	2168.11	2884.02	604.364	652.469	100	DOWN_AtMSCtrl_UP_AtC32I	UP
AT4G03060	96.9418	5.22602	0.633475	8.24977	1.59e-16	1.71e-14	255	144	3	7	230.65	147.165	3.2551	6.69689	100	DOWN_AtMSCtrl_UP_AtC32I	UP
AT5G54610	108.052	4.68012	0.570594	8.20219	2.36e-16	2.45e-14	304	138	7	9	274.971	141.033	7.59524	8.61029	100	DOWN_AtMSCtrl_UP_AtC32I	UP
AT4G24570	1976.65	2.33411	0.286793	8.13866	4e-16	3.95e-14	2671	4092	678	599	2415.95	4181.94	735.653	573.063	100	DOWN_AtMSCtrl_UP_AtC32I	UP
AT1G24148	692.443	2.12135	0.26134	8.11722	4.77e-16	4.66e-14	1278	1073	206	307	1155.96	1096.58	223.517	293.707	100	DOWN_AtMSCtrl_UP_AtC32I	UP
AT2G38240	185.29	3.55067	0.437916	8.10809	5.14e-16	4.91e-14	265	434	19	39	239.695	443.539	20.6157	37.3113	100	DOWN_AtMSCtrl_UP_AtC32I	UP
AT5G01015	117.478	3.59754	0.453159	7.93881	2.04e-15	1.75e-13	239	213	20	15	216.178	217.681	21.7007	14.3505	100	DOWN_AtMSCtrl_UP_AtC32I	UP
AT1G65490	155.19	3.54849	0.448129	7.91846	2.4e-15	2.06e-13	339	260	12	37	306.629	265.714	13.0204	35.3979	100	DOWN_AtMSCtrl_UP_AtC32I	UP
AT3G03780	584.058	2.45444	0.313854	7.82031	5.27e-15	4.25e-13	1399	695	163	192	1265.41	710.275	176.861	183.686	100	DOWN_AtMSCtrl_UP_AtC32I	UP
AT1G50732	569.346	2.0239	0.262905	7.69822	1.38e-14	1.04e-12	1072	840	191	253	969.636	858.462	207.242	242.045	100	DOWN_AtMSCtrl_UP_AtC32I	UP
AT4G13500	1137.93	2.03085	0.264739	7.67116	1.7e-14	1.26e-12	2055	1760	326	565	1858.77	1798.68	353.721	540.535	100	DOWN_AtMSCtrl_UP_AtC32I	UP
AT1G64980	335.92	2.22549	0.29138	7.63774	2.21e-14	1.61e-12	600	552	116	116	542.707	564.132	125.864	110.977	100	DOWN_AtMSCtrl_UP_AtC32I	UP
AT2G43530	791.911	2.00942	0.265028	7.58192	3.4e-14	2.43e-12	1354	1285	240	386	1224.71	1313.24	260.408	369.286	100	DOWN_AtMSCtrl_UP_AtC32I	UP
AT1G62560	167.419	3.04637	0.407983	7.4669	8.21e-14	5.54e-12	414	218	35	36	374.468	222.791	37.9762	34.4412	100	DOWN_AtMSCtrl_UP_AtC32I	UP
AT3G29030	522.455	2.03607	0.27828	7.31662	2.54e-13	1.59e-11	1063	703	197	205	961.495	718.451	213.752	196.123	100	DOWN_AtMSCtrl_UP_AtC32I	UP
AT3G26960	80.6671	4.35676	0.597482	7.29186	3.06e-13	1.88e-11	180	142	3	12	162.812	145.121	3.2551	11.4804	100	DOWN_AtMSCtrl_UP_AtC32I	UP
AT3G06145	179.077	2.82616	0.387996	7.28399	3.24e-13	1.99e-11	299	350	31	57	270.449	357.693	33.6361	54.5318	100	DOWN_AtMSCtrl_UP_AtC32I	UP
AT3G20600	186.624	2.51991	0.34796	7.24195	4.42e-13	2.65e-11	348	314	51	58	314.77	320.901	55.3368	55.4885	100	DOWN_AtMSCtrl_UP_AtC32I	UP
AT5G63780	1085.39	2.02976	0.282776	7.17797	7.08e-13	4.12e-11	2408	1281	410	428	2178.06	1309.15	444.864	409.467	100	DOWN_AtMSCtrl_UP_AtC32I	UP
AT3G57450	395.61	2.1173	0.299579	7.06757	1.58e-12	8.6e-11	588	738	140	151	531.852	754.22	151.905	144.462	100	DOWN_AtMSCtrl_UP_AtC32I	UP
AT1G07135	1163.47	2.11153	0.303315	6.96151	3.37e-12	1.73e-10	1434	2429	410	449	1297.07	2482.39	444.864	429.558	100	DOWN_AtMSCtrl_UP_AtC32I	UP
AT2G02990	80.9416	3.87998	0.558713	6.94449	3.8e-12	1.92e-10	144	169	13	7	130.25	172.714	14.1055	6.69689	100	DOWN_AtMSCtrl_UP_AtC32I	UP
AT5G58310	229.118	2.62681	0.382262	6.87174	6.34e-12	3.07e-10	536	297	74	50	484.818	303.528	80.2926	47.8349	100	DOWN_AtMSCtrl_UP_AtC32I	UP
AT3G10930	76.3106	3.90204	0.568047	6.86923	6.46e-12	3.12e-10	138	158	6	13	124.823	161.473	6.51021	12.4371	100	DOWN_AtMSCtrl_UP_AtC32I	UP
AT3G28340	129.114	2.76066	0.40594	6.80066	1.04e-11	4.79e-10	259	211	34	31	234.268	215.638	36.8912	29.6577	100	DOWN_AtMSCtrl_UP_AtC32I	UP
AT1G65860	123.102	3.51141	0.518993	6.76582	1.33e-11	5.9e-10	310	169	8	32	280.398	172.714	8.68028	30.6144	100	DOWN_AtMSCtrl_UP_AtC32I	UP
AT2G42540	402.21	2.82194	0.420171	6.71618	1.87e-11	7.99e-10	388	1036	83	114	350.95	1058.77	90.0579	109.064	100	DOWN_AtMSCtrl_UP_AtC32I	UP
AT5G64660	198.582	2.49298	0.373027	6.68311	2.34e-11	9.87e-10	286	407	53	65	258.69	415.945	57.5068	62.1854	100	DOWN_AtMSCtrl_UP_AtC32I	UP
AT5G44568	163.461	2.79579	0.421762	6.62883	3.38e-11	1.4e-09	416	191	38	43	376.277	195.198	41.2313	41.138	100	DOWN_AtMSCtrl_UP_AtC32I	UP
AT5G07030	226.305	2.41321	0.366759	6.57984	4.71e-11	1.9e-09	493	309	82	57	445.924	315.791	88.9728	54.5318	100	DOWN_AtMSCtrl_UP_AtC32I	UP
AT5G14200	721.113	2.21602	0.339438	6.52851	6.64e-11	2.63e-09	1806	724	232	271	1633.55	739.913	251.728	259.265	100	DOWN_AtMSCtrl_UP_AtC32I	UP
AT5G59820	210.192	2.52809	0.393457	6.42532	1.32e-10	4.91e-09	268	464	58	64	242.409	474.198	62.932	61.2287	100	DOWN_AtMSCtrl_UP_AtC32I	UP
AT2G27080	178.25	2.34361	0.369427	6.34393	2.24e-10	7.93e-09	278	337	48	68	251.454	344.407	52.0817	65.0555	100	DOWN_AtMSCtrl_UP_AtC32I	UP
AT1G49410	220.749	2.09565	0.335525	6.24588	4.21e-10	1.39e-08	405	342	65	101	366.327	349.517	70.5273	96.6266	100	DOWN_AtMSCtrl_UP_AtC32I	UP
AT5G52050	234.433	2.00719	0.323979	6.19545	5.81e-10	1.87e-08	375	403	83	101	339.192	411.857	90.0579	96.6266	100	DOWN_AtMSCtrl_UP_AtC32I	UP
AT1G26770	211.817	2.18095	0.36759	5.93311	2.97e-09	8.1e-08	308	407	57	95	278.589	415.945	61.847	90.8864	100	DOWN_AtMSCtrl_UP_AtC32I	UP
AT4G29610	119.219	3.07662	0.518845	5.92976	3.03e-09	8.24e-08	186	253	10	41	168.239	258.561	10.8503	39.2247	100	DOWN_AtMSCtrl_UP_AtC32I	UP
AT5G24105	110.026	2.50593	0.425654	5.88725	3.93e-09	1.04e-07	189	199	28	37	170.953	203.374	30.381	35.3979	100	DOWN_AtMSCtrl_UP_AtC32I	UP
AT1G67330	48.3502	9.0114	1.5436	5.83793	5.29e-09	1.37e-07	111	91	0	0	100.401	93.0001	0	0	100	DOWN_AtMSCtrl_UP_AtC32I	UP
AT1G31173	158.314	2.36509	0.407452	5.80459	6.45e-09	1.63e-07	293	260	31	72	265.022	265.714	33.6361	68.8823	100	DOWN_AtMSCtrl_UP_AtC32I	UP
AT1G24575	108.157	2.59802	0.448165	5.79703	6.75e-09	1.71e-07	163	219	31	29	147.435	223.813	33.6361	27.7443	100	DOWN_AtMSCtrl_UP_AtC32I	UP
AT1G28480	62.4423	3.28931	0.571082	5.75978	8.42e-09	2.08e-07	123	113	8	15	111.255	115.484	8.68028	14.3505	100	DOWN_AtMSCtrl_UP_AtC32I	UP
AT3G13710	47.6571	8.98849	1.56614	5.73926	9.51e-09	2.33e-07	65	129	0	0	58.7932	131.835	0	0	100	DOWN_AtMSCtrl_UP_AtC32I	UP
AT4G13395	115.01	2.71875	0.475822	5.71379	1.1e-08	2.65e-07	151	257	34	25	136.581	262.649	36.8912	23.9175	100	DOWN_AtMSCtrl_UP_AtC32I	UP
AT1G76955	90.2611	2.85119	0.502875	5.66977	1.43e-08	3.34e-07	225	111	23	20	203.515	113.44	24.9558	19.134	100	DOWN_AtMSCtrl_UP_AtC32I	UP
AT5G07690	121.919	2.75094	0.493682	5.57229	2.51e-08	5.54e-07	336	118	30	32	303.916	120.593	32.551	30.6144	100	DOWN_AtMSCtrl_UP_AtC32I	UP
AT5G05960	90.8755	2.51877	0.453946	5.5486	2.88e-08	6.22e-07	167	155	26	27	151.053	158.407	28.2109	25.8309	100	DOWN_AtMSCtrl_UP_AtC32I	UP
AT1G06830	106.389	2.3393	0.422401	5.5381	3.06e-08	6.54e-07	203	168	33	36	183.616	171.692	35.8061	34.4412	100	DOWN_AtMSCtrl_UP_AtC32I	UP
AT5G63060	75.7825	2.88741	0.522757	5.52342	3.32e-08	7.08e-07	152	127	11	25	137.486	129.791	11.9354	23.9175	100	DOWN_AtMSCtrl_UP_AtC32I	UP
AT1G53035	104.69	2.64103	0.483877	5.45806	4.81e-08	9.83e-07	231	149	16	42	208.942	152.275	17.3606	40.1814	100	DOWN_AtMSCtrl_UP_AtC32I	UP
AT1G65390	90.9515	2.4602	0.45153	5.44859	5.08e-08	1.03e-06	172	149	26	29	155.576	152.275	28.2109	27.7443	100	DOWN_AtMSCtrl_UP_AtC32I	UP
AT3G22550	180.006	2.05785	0.380308	5.41101	6.27e-08	1.24e-06	362	248	48	91	327.433	253.451	52.0817	87.0596	100	DOWN_AtMSCtrl_UP_AtC32I	UP
AT1G78410	146.661	2.01544	0.373434	5.39703	6.78e-08	1.33e-06	258	232	48	67	233.364	237.099	52.0817	64.0988	100	DOWN_AtMSCtrl_UP_AtC32I	UP
AT4G16880	118.576	2.39834	0.444541	5.39509	6.85e-08	1.34e-06	279	143	39	35	252.359	146.143	42.3164	33.4845	100	DOWN_AtMSCtrl_UP_AtC32I	UP
AT2G35710	69.1804	2.81722	0.529602	5.31951	1.04e-07	1.95e-06	155	100	14	20	140.199	102.198	15.1905	19.134	100	DOWN_AtMSCtrl_UP_AtC32I	UP
AT3G29000	39.8478	4.40878	0.832448	5.29616	1.18e-07	2.19e-06	53	102	4	3	47.9391	104.242	4.34014	2.8701	100	DOWN_AtMSCtrl_UP_AtC32I	UP
AT2G21185	103.74	2.25748	0.428597	5.26713	1.39e-07	2.52e-06	192	166	29	42	173.666	169.648	31.466	40.1814	100	DOWN_AtMSCtrl_UP_AtC32I	UP
AT1G17090	48.3997	3.34382	0.63493	5.26644	1.39e-07	2.52e-06	101	83	9	8	91.3556	84.8242	9.76531	7.65359	100	DOWN_AtMSCtrl_UP_AtC32I	UP
AT4G04750	120.678	2.337	0.443837	5.26546	1.4e-07	2.53e-06	284	143	32	47	256.881	146.143	34.7211	44.9648	100	DOWN_AtMSCtrl_UP_AtC32I	UP
AT3G10080	169.597	2.07667	0.395823	5.24646	1.55e-07	2.78e-06	331	244	41	89	299.393	249.363	44.4864	85.1462	100	DOWN_AtMSCtrl_UP_AtC32I	UP
AT4G22470	108.128	2.46772	0.471062	5.23863	1.62e-07	2.89e-06	164	213	41	23	148.34	217.681	44.4864	22.0041	100	DOWN_AtMSCtrl_UP_AtC32I	UP
AT1G70210	152.953	2.03179	0.390114	5.2082	1.91e-07	3.35e-06	307	209	67	50	277.685	213.594	72.6973	47.8349	100	DOWN_AtMSCtrl_UP_AtC32I	UP
AT2G32235	85.4901	2.375	0.465942	5.09719	3.45e-07	5.62e-06	153	145	29	25	138.39	148.187	31.466	23.9175	100	DOWN_AtMSCtrl_UP_AtC32I	UP
AT1G10370	84.4261	2.4455	0.488119	5.01004	5.44e-07	8.38e-06	130	164	29	22	117.586	167.605	31.466	21.0474	100	DOWN_AtMSCtrl_UP_AtC32I	UP
AT2G44840	35.6097	4.21579	0.846247	4.98175	6.3e-07	9.51e-06	69	71	6	1	62.4113	72.5605	6.51021	0.956699	100	DOWN_AtMSCtrl_UP_AtC32I	UP
AT4G20970	25.1912	8.06962	1.62195	4.97525	6.52e-07	9.83e-06	47	57	0	0	42.512	58.2528	0	0	100	DOWN_AtMSCtrl_UP_AtC32I	UP
AT3G56020	130.551	2.04109	0.411263	4.96297	6.94e-07	1.04e-05	182	250	50	50	164.621	255.495	54.2517	47.8349	100	DOWN_AtMSCtrl_UP_AtC32I	UP
AT3G11090	64.08	2.70319	0.550117	4.91386	8.93e-07	1.3e-05	134	99	11	23	121.204	101.176	11.9354	22.0041	100	DOWN_AtMSCtrl_UP_AtC32I	UP
AT5G62520	46.6683	3.55389	0.727956	4.88201	1.05e-06	1.5e-05	104	76	12	2	94.0691	77.6704	13.0204	1.9134	100	DOWN_AtMSCtrl_UP_AtC32I	UP
AT2G13820	94.6842	2.20011	0.453188	4.85473	1.21e-06	1.71e-05	190	136	37	29	171.857	138.989	40.1463	27.7443	100	DOWN_AtMSCtrl_UP_AtC32I	UP
AT3G11120	268.957	2.0764	0.430994	4.8177	1.45e-06	2.01e-05	474	432	44	165	428.738	441.495	47.7415	157.855	100	DOWN_AtMSCtrl_UP_AtC32I	UP
AT3G17185	70.4725	2.55303	0.531319	4.80508	1.55e-06	2.11e-05	161	93	23	17	145.626	95.044	24.9558	16.2639	100	DOWN_AtMSCtrl_UP_AtC32I	UP
AT3G44990	49.0946	3.14113	0.655019	4.79549	1.62e-06	2.2e-05	80	102	5	15	72.3609	104.242	5.42517	14.3505	100	DOWN_AtMSCtrl_UP_AtC32I	UP
AT1G80850	104.365	2.2589	0.478478	4.72101	2.35e-06	3.01e-05	243	123	24	48	219.796	125.703	26.0408	45.9215	100	DOWN_AtMSCtrl_UP_AtC32I	UP
AT5G52760	62.9733	2.52779	0.539468	4.68572	2.79e-06	3.5e-05	120	104	13	24	108.541	106.286	14.1055	22.9608	100	DOWN_AtMSCtrl_UP_AtC32I	UP
AT5G59670	247.664	2.24664	0.481339	4.66748	3.05e-06	3.78e-05	718	165	85	84	649.439	168.626	92.2279	80.3627	100	DOWN_AtMSCtrl_UP_AtC32I	UP
AT1G43160	28.2157	5.78461	1.2395	4.6669	3.06e-06	3.79e-05	56	59	0	2	50.6526	60.2967	0	1.9134	100	DOWN_AtMSCtrl_UP_AtC32I	UP
AT2G24940	169.231	10.8184	2.31931	4.66451	3.09e-06	3.82e-05	136	542	0	0	123.013	553.912	0	0	100	DOWN_AtMSCtrl_UP_AtC32I	UP
AT5G46730	69.347	2.49815	0.543655	4.5951	4.33e-06	5.12e-05	90	151	19	22	81.406	154.319	20.6157	21.0474	99.99	DOWN_AtMSCtrl_UP_AtC32I	UP
AT5G06790	82.6384	2.10707	0.46255	4.55534	5.23e-06	6.05e-05	144	135	31	30	130.25	137.967	33.6361	28.701	99.99	DOWN_AtMSCtrl_UP_AtC32I	UP
AT1G75900	94.7357	2.00656	0.441373	4.54618	5.46e-06	6.29e-05	149	165	37	37	134.772	168.626	40.1463	35.3979	99.99	DOWN_AtMSCtrl_UP_AtC32I	UP
AT4G14010	94.1642	2.04651	0.453947	4.50827	6.54e-06	7.29e-05	157	158	26	47	142.008	161.473	28.2109	44.9648	99.99	DOWN_AtMSCtrl_UP_AtC32I	UP
AT5G35740	112.805	2.07269	0.461705	4.4892	7.15e-06	7.9e-05	217	165	24	63	196.279	168.626	26.0408	60.272	99.99	DOWN_AtMSCtrl_UP_AtC32I	UP
AT5G20935	108.846	2.0527	0.460302	4.45947	8.22e-06	8.91e-05	147	213	49	33	132.963	217.681	53.1667	31.5711	99.99	DOWN_AtMSCtrl_UP_AtC32I	UP
AT3G12965	74.2487	2.19161	0.492161	4.45303	8.47e-06	9.12e-05	128	125	29	23	115.777	127.747	31.466	22.0041	99.99	DOWN_AtMSCtrl_UP_AtC32I	UP
AT3G01550	34.9305	3.26912	0.735464	4.44498	8.79e-06	9.41e-05	79	54	5	8	71.4564	55.1869	5.42517	7.65359	99.99	DOWN_AtMSCtrl_UP_AtC32I	UP
AT1G11850	83.75	2.06258	0.469551	4.39266	1.12e-05	0.000115982	154	128	36	27	139.295	130.813	39.0612	25.8309	99.99	DOWN_AtMSCtrl_UP_AtC32I	UP
AT3G12110	87.5749	2.19614	0.504328	4.35459	1.33e-05	0.000135069	177	125	17	46	160.098	127.747	18.4456	44.0081	99.99	DOWN_AtMSCtrl_UP_AtC32I	UP
AT1G23205	69.8255	2.31876	0.536163	4.32474	1.53e-05	0.000151627	127	115	30	15	114.873	117.528	32.551	14.3505	99.98	DOWN_AtMSCtrl_UP_AtC32I	UP
AT5G46700	61.058	2.38585	0.551998	4.3222	1.54e-05	0.000152932	133	83	14	25	120.3	84.8242	15.1905	23.9175	99.98	DOWN_AtMSCtrl_UP_AtC32I	UP
AT2G24850	90.9084	2.36192	0.547863	4.31116	1.62e-05	0.000159598	163	154	11	49	147.435	157.385	11.9354	46.8782	99.98	DOWN_AtMSCtrl_UP_AtC32I	UP
AT5G22570	15.5793	7.37739	1.71116	4.31133	1.62e-05	0.000159598	35	30	0	0	31.6579	30.6594	0	0	99.98	DOWN_AtMSCtrl_UP_AtC32I	UP
AT3G02840	45.9681	3.12658	0.728575	4.29136	1.78e-05	0.000172294	68	101	15	3	61.5067	103.22	16.2755	2.8701	99.98	DOWN_AtMSCtrl_UP_AtC32I	UP
AT4G25470	55.1376	2.8463	0.664068	4.28615	1.82e-05	0.000175784	58	138	17	9	52.4616	141.033	18.4456	8.61029	99.98	DOWN_AtMSCtrl_UP_AtC32I	UP
AT5G47330	48.9958	2.69735	0.633262	4.25946	2.05e-05	0.000195259	67	107	9	17	60.6022	109.352	9.76531	16.2639	99.98	DOWN_AtMSCtrl_UP_AtC32I	UP
AT5G40080	72.1906	2.14216	0.504692	4.2445	2.19e-05	0.000206897	117	127	19	34	105.828	129.791	20.6157	32.5278	99.98	DOWN_AtMSCtrl_UP_AtC32I	UP
AT1G09950	31.5034	3.62921	0.85525	4.24345	2.2e-05	0.000207753	62	59	8	1	56.0797	60.2967	8.68028	0.956699	99.98	DOWN_AtMSCtrl_UP_AtC32I	UP
AT4G25490	79.3694	2.33582	0.555328	4.20619	2.6e-05	0.000238894	83	186	20	32	75.0744	190.088	21.7007	30.6144	99.98	DOWN_AtMSCtrl_UP_AtC32I	UP
AT4G34410	60.6228	2.2213	0.529819	4.19257	2.76e-05	0.000250452	119	90	21	21	107.637	91.9781	22.7857	20.0907	99.97	DOWN_AtMSCtrl_UP_AtC32I	UP
AT2G37430	31.8903	3.09499	0.75551	4.09655	4.19e-05	0.000359314	64	55	8	5	57.8887	56.2088	8.68028	4.78349	99.96	DOWN_AtMSCtrl_UP_AtC32I	UP
AT5G15950	67.1946	2.12998	0.52379	4.06649	4.77e-05	0.000402449	148	83	25	24	133.868	84.8242	27.1259	22.9608	99.96	DOWN_AtMSCtrl_UP_AtC32I	UP
AT5G10625	37.5863	3.10193	0.765086	4.05436	5.03e-05	0.00042016	56	82	12	3	50.6526	83.8023	13.0204	2.8701	99.96	DOWN_AtMSCtrl_UP_AtC32I	UP
AT2G39518	34.0615	2.87749	0.71535	4.0225	5.76e-05	0.000472906	58	66	8	8	52.4616	67.4506	8.68028	7.65359	99.95	DOWN_AtMSCtrl_UP_AtC32I	UP
AT2G19690	41.6478	2.53795	0.632825	4.0105	6.06e-05	0.000493771	78	70	12	12	70.5519	71.5385	13.0204	11.4804	99.95	DOWN_AtMSCtrl_UP_AtC32I	UP
AT1G08090	28.3233	3.74314	0.933952	4.00785	6.13e-05	0.000498168	49	60	0	8	44.321	61.3187	0	7.65359	99.95	DOWN_AtMSCtrl_UP_AtC32I	UP
AT3G59250	36.7877	3.04001	0.761535	3.99196	6.55e-05	0.00052772	100	40	4	12	90.4511	40.8792	4.34014	11.4804	99.95	DOWN_AtMSCtrl_UP_AtC32I	UP
AT5G67450	75.3108	2.14521	0.538816	3.98134	6.85e-05	0.000547045	181	80	32	22	163.716	81.7583	34.7211	21.0474	99.95	DOWN_AtMSCtrl_UP_AtC32I	UP
AT4G29740	86.5795	2.00753	0.506121	3.9665	7.29e-05	0.00057779	199	95	40	27	179.998	97.088	43.4014	25.8309	99.94	DOWN_AtMSCtrl_UP_AtC32I	UP
AT2G40670	78.0379	2.07085	0.522854	3.96067	7.47e-05	0.00058962	175	92	19	41	158.289	94.022	20.6157	39.2247	99.94	DOWN_AtMSCtrl_UP_AtC32I	UP
AT3G57240	65.3986	2.04729	0.521571	3.92524	8.66e-05	0.000671345	139	83	25	25	125.727	84.8242	27.1259	23.9175	99.93	DOWN_AtMSCtrl_UP_AtC32I	UP
AT5G41650	28.7236	3.32376	0.859179	3.86853	0.000109491	0.000824726	43	64	8	2	38.894	65.4066	8.68028	1.9134	99.92	DOWN_AtMSCtrl_UP_AtC32I	UP
AT2G22470	35.7416	3.12161	0.808827	3.85942	0.000113654	0.000850807	72	62	1	14	65.1248	63.3627	1.08503	13.3938	99.91	DOWN_AtMSCtrl_UP_AtC32I	UP
AT1G67750	55.9234	2.34954	0.610707	3.84725	0.000119449	0.00088871	111	85	8	29	100.401	86.8682	8.68028	27.7443	99.91	DOWN_AtMSCtrl_UP_AtC32I	UP
AT1G52240	17.6699	5.10169	1.3416	3.80269	0.000143134	0.00103769	41	31	0	2	37.0849	31.6813	0	1.9134	99.9	DOWN_AtMSCtrl_UP_AtC32I	UP
AT1G53070	43.9399	2.47046	0.653667	3.77939	0.00015721	0.00112315	100	57	17	9	90.4511	58.2528	18.4456	8.61029	99.89	DOWN_AtMSCtrl_UP_AtC32I	UP
AT5G43725	22.7509	3.59355	0.953727	3.7679	0.000164624	0.00116566	49	39	1	6	44.321	39.8572	1.08503	5.74019	99.88	DOWN_AtMSCtrl_UP_AtC32I	UP
AT5G63130	44.3027	2.62618	0.69819	3.76141	0.000168961	0.00119339	74	84	4	21	66.9338	85.8462	4.34014	20.0907	99.88	DOWN_AtMSCtrl_UP_AtC32I	UP
AT4G36010	60.0143	2.39313	0.638632	3.74728	0.000178764	0.00125482	125	87	6	33	113.064	88.9122	6.51021	31.5711	99.87	DOWN_AtMSCtrl_UP_AtC32I	UP
AT1G01560	46.9687	2.40851	0.642914	3.74624	0.000179502	0.00125844	117	51	17	12	105.828	52.1209	18.4456	11.4804	99.87	DOWN_AtMSCtrl_UP_AtC32I	UP
AT5G23350	18.5179	4.10443	1.09875	3.73553	0.000187318	0.00130784	48	26	2	2	43.4165	26.5714	2.17007	1.9134	99.87	DOWN_AtMSCtrl_UP_AtC32I	UP
AT2G36885	56.1593	2.41075	0.647125	3.72532	0.000195067	0.00135361	133	67	26	8	120.3	68.4726	28.2109	7.65359	99.86	DOWN_AtMSCtrl_UP_AtC32I	UP
AT5G03350	551.606	3.67468	0.987524	3.7211	0.000198354	0.00137027	1696	501	109	44	1534.05	512.011	118.269	42.0947	99.86	DOWN_AtMSCtrl_UP_AtC32I	UP
AT4G31840	52.189	2.12051	0.574348	3.69203	0.000222473	0.0015045	105	73	22	16	94.9736	74.6045	23.8708	15.3072	99.85	DOWN_AtMSCtrl_UP_AtC32I	UP
AT2G30770	25.0313	3.55365	0.96633	3.67747	0.00023556	0.00157608	48	48	0	8	43.4165	49.055	0	7.65359	99.84	DOWN_AtMSCtrl_UP_AtC32I	UP
AT2G27970	57.4329	2.03248	0.55781	3.64367	0.000268773	0.00175751	115	79	15	30	104.019	80.7363	16.2755	28.701	99.82	DOWN_AtMSCtrl_UP_AtC32I	UP
AT2G19570	101.8	2.26897	0.628609	3.6095	0.000306784	0.00196084	84	256	13	58	75.9789	261.627	14.1055	55.4885	99.8	DOWN_AtMSCtrl_UP_AtC32I	UP
AT5G26690	18.0102	4.10333	1.14558	3.58188	0.000341129	0.00214409	37	34	0	4	33.4669	34.7473	0	3.8268	99.79	DOWN_AtMSCtrl_UP_AtC32I	UP
AT4G14450	33.5939	2.49752	0.697368	3.58135	0.000341826	0.00214689	63	56	8	12	56.9842	57.2308	8.68028	11.4804	99.79	DOWN_AtMSCtrl_UP_AtC32I	UP
AT3G21460	54.0421	2.32544	0.652603	3.56332	0.000366187	0.00227386	56	127	10	26	50.6526	129.791	10.8503	24.8742	99.77	DOWN_AtMSCtrl_UP_AtC32I	UP
AT1G12610	26.8595	2.99135	0.839623	3.56273	0.000367022	0.00227778	39	59	3	9	35.2759	60.2967	3.2551	8.61029	99.77	DOWN_AtMSCtrl_UP_AtC32I	UP
AT5G21960	39.2364	2.40741	0.686105	3.50881	0.000450119	0.00269584	66	71	6	19	59.6977	72.5605	6.51021	18.1773	99.73	DOWN_AtMSCtrl_UP_AtC32I	UP
AT3G25597	41.3169	2.43338	0.697713	3.48766	0.000487271	0.00287461	99	49	6	20	89.5466	50.077	6.51021	19.134	99.71	DOWN_AtMSCtrl_UP_AtC32I	UP
AT5G16600	16.9083	3.9431	1.13376	3.4779	0.000505366	0.00296184	43	24	3	1	38.894	24.5275	3.2551	0.956699	99.7	DOWN_AtMSCtrl_UP_AtC32I	UP
AT3G62780	29.7578	2.56528	0.739389	3.46945	0.000521521	0.00304393	55	51	7	10	49.7481	52.1209	7.59524	9.56699	99.7	DOWN_AtMSCtrl_UP_AtC32I	UP
AT1G66080	42.6866	2.12993	0.615322	3.46149	0.00053719	0.00311933	79	66	17	14	71.4564	67.4506	18.4456	13.3938	99.69	DOWN_AtMSCtrl_UP_AtC32I	UP
AT1G30135	40.6269	2.19389	0.637939	3.43903	0.00058381	0.00333875	73	66	10	19	66.0293	67.4506	10.8503	18.1773	99.67	DOWN_AtMSCtrl_UP_AtC32I	UP
AT1G74010	33.7962	2.34984	0.697714	3.36791	0.000757391	0.00416479	55	62	8	14	49.7481	63.3627	8.68028	13.3938	99.58	DOWN_AtMSCtrl_UP_AtC32I	UP
AT1G52770	48.344	2.2144	0.660284	3.35372	0.000797338	0.00434095	118	51	23	10	106.732	52.1209	24.9558	9.56699	99.57	DOWN_AtMSCtrl_UP_AtC32I	UP
AT1G10460	22.0649	3.07355	0.920446	3.3392	0.0008402	0.00453223	43	39	7	2	38.894	39.8572	7.59524	1.9134	99.55	DOWN_AtMSCtrl_UP_AtC32I	UP
AT5G15960	20.8892	3.47914	1.04302	3.33564	0.000851046	0.00457478	33	46	0	7	29.8489	47.011	0	6.69689	99.54	DOWN_AtMSCtrl_UP_AtC32I	UP
AT5G42380	13.5703	4.71141	1.42211	3.31298	0.00092307	0.00490305	24	30	0	2	21.7083	30.6594	0	1.9134	99.51	DOWN_AtMSCtrl_UP_AtC32I	UP
AT1G79820	41.5586	2.17711	0.66445	3.27656	0.00105082	0.00545884	87	56	20	9	78.6925	57.2308	21.7007	8.61029	99.45	DOWN_AtMSCtrl_UP_AtC32I	UP
AT5G45630	20.2522	3.55602	1.08676	3.27214	0.00106737	0.00553591	27	49	6	0	24.4218	50.077	6.51021	0	99.45	DOWN_AtMSCtrl_UP_AtC32I	UP
AT2G25737	42.8337	2.32446	0.717101	3.24147	0.00118917	0.00604645	87	63	4	25	78.6925	64.3847	4.34014	23.9175	99.4	DOWN_AtMSCtrl_UP_AtC32I	UP
AT5G64080	31.6005	2.29066	0.709668	3.22779	0.00124751	0.00628855	64	46	11	10	57.8887	47.011	11.9354	9.56699	99.37	DOWN_AtMSCtrl_UP_AtC32I	UP
AT2G03090	24.194	3.15594	0.984035	3.20714	0.00134062	0.00668268	58	34	0	10	52.4616	34.7473	0	9.56699	99.33	DOWN_AtMSCtrl_UP_AtC32I	UP
AT4G27652	48.8251	2.10658	0.658407	3.19951	0.00137659	0.00683219	58	104	9	28	52.4616	106.286	9.76531	26.7876	99.32	DOWN_AtMSCtrl_UP_AtC32I	UP
AT1G07490	35.9406	2.25136	0.704632	3.19508	0.00139791	0.00691955	69	55	17	7	62.4113	56.2088	18.4456	6.69689	99.31	DOWN_AtMSCtrl_UP_AtC32I	UP
AT4G25480	13.7213	4.12557	1.29795	3.17854	0.00148021	0.00724887	27	27	0	3	24.4218	27.5934	0	2.8701	99.28	DOWN_AtMSCtrl_UP_AtC32I	UP
AT2G20835	15.3064	3.473	1.09945	3.15884	0.00158399	0.00768633	35	24	2	3	31.6579	24.5275	2.17007	2.8701	99.23	DOWN_AtMSCtrl_UP_AtC32I	UP
AT5G53290	12.3221	4.56872	1.45184	3.14684	0.00165047	0.00795298	23	26	0	2	20.8038	26.5714	0	1.9134	99.2	DOWN_AtMSCtrl_UP_AtC32I	UP
AT2G27420	24.541	2.54449	0.810732	3.13851	0.00169809	0.00812636	44	43	8	6	39.7985	43.9451	8.68028	5.74019	99.19	DOWN_AtMSCtrl_UP_AtC32I	UP
AT5G61350	32.6334	2.3158	0.740169	3.12875	0.00175554	0.00834261	68	46	15	6	61.5067	47.011	16.2755	5.74019	99.17	DOWN_AtMSCtrl_UP_AtC32I	UP
AT1G47520	21.8952	2.80037	0.895162	3.12834	0.00175797	0.00834952	52	29	3	8	47.0346	29.6374	3.2551	7.65359	99.17	DOWN_AtMSCtrl_UP_AtC32I	UP
AT3G29034	23.7409	2.60633	0.839245	3.10557	0.00189913	0.00890063	37	47	8	5	33.4669	48.033	8.68028	4.78349	99.11	DOWN_AtMSCtrl_UP_AtC32I	UP
AT1G65870	25.2939	2.47425	0.799507	3.09472	0.00196996	0.00917042	45	44	9	6	40.703	44.9671	9.76531	5.74019	99.08	DOWN_AtMSCtrl_UP_AtC32I	UP
AT2G22880	30.2989	2.3187	0.758437	3.05721	0.00223409	0.0101761	36	67	8	12	32.5624	68.4726	8.68028	11.4804	98.98	DOWN_AtMSCtrl_UP_AtC32I	UP
AT5G26330	28.2591	2.2698	0.744454	3.04895	0.00229642	0.0104144	56	42	10	9	50.6526	42.9231	10.8503	8.61029	98.96	DOWN_AtMSCtrl_UP_AtC32I	UP
AT2G15020	17.364	3.09981	1.01876	3.04274	0.00234431	0.0106014	28	36	5	2	25.3263	36.7912	5.42517	1.9134	98.94	DOWN_AtMSCtrl_UP_AtC32I	UP
AT4G23496	11.5557	4.47366	1.47277	3.03759	0.00238481	0.0107417	23	23	0	2	20.8038	23.5055	0	1.9134	98.93	DOWN_AtMSCtrl_UP_AtC32I	UP
AT4G36830	15.5271	3.53974	1.1675	3.03191	0.00243011	0.0109198	34	26	0	5	30.7534	26.5714	0	4.78349	98.91	DOWN_AtMSCtrl_UP_AtC32I	UP
AT3G03850	38.6673	2.09982	0.699856	3.00036	0.00269657	0.0119145	74	57	21	7	66.9338	58.2528	22.7857	6.69689	98.81	DOWN_AtMSCtrl_UP_AtC32I	UP
AT5G41900	24.9455	2.49936	0.83864	2.98025	0.00288014	0.0125926	34	53	4	11	30.7534	54.1649	4.34014	10.5237	98.74	DOWN_AtMSCtrl_UP_AtC32I	UP
AT1G17560	25.7134	2.48338	0.835488	2.97237	0.00295513	0.012861	59	33	11	4	53.3661	33.7253	11.9354	3.8268	98.71	DOWN_AtMSCtrl_UP_AtC32I	UP
AT4G30450	27.278	2.33987	0.788317	2.96818	0.00299565	0.0130195	41	53	5	13	37.0849	54.1649	5.42517	12.4371	98.7	DOWN_AtMSCtrl_UP_AtC32I	UP
AT4G24700	33.8005	2.39884	0.809329	2.96399	0.00303676	0.0131557	57	61	2	20	51.5571	62.3407	2.17007	19.134	98.68	DOWN_AtMSCtrl_UP_AtC32I	UP
AT5G38240	16.3393	3.01876	1.02128	2.95586	0.003118	0.0134665	27	33	4	3	24.4218	33.7253	4.34014	2.8701	98.65	DOWN_AtMSCtrl_UP_AtC32I	UP
AT2G32280	20.2499	2.6301	0.892997	2.94525	0.00322692	0.013849	33	39	6	5	29.8489	39.8572	6.51021	4.78349	98.62	DOWN_AtMSCtrl_UP_AtC32I	UP
AT3G45430	29.163	2.15006	0.732452	2.93543	0.00333084	0.0142161	60	40	11	10	54.2707	40.8792	11.9354	9.56699	98.58	DOWN_AtMSCtrl_UP_AtC32I	UP
AT1G13145	23.6995	2.37332	0.811162	2.92583	0.00343539	0.0145821	46	37	8	7	41.6075	37.8132	8.68028	6.69689	98.54	DOWN_AtMSCtrl_UP_AtC32I	UP
AT1G61340	34.3978	2.24662	0.771241	2.91299	0.00357987	0.0151045	34	81	16	7	30.7534	82.7803	17.3606	6.69689	98.49	DOWN_AtMSCtrl_UP_AtC32I	UP
AT4G39510	42.3839	2.00534	0.693581	2.89129	0.00383667	0.0160054	105	40	9	25	94.9736	40.8792	9.76531	23.9175	98.4	DOWN_AtMSCtrl_UP_AtC32I	UP
AT2G32765	33.5247	2.14398	0.742305	2.88828	0.00387359	0.0161159	68	47	5	20	61.5067	48.033	5.42517	19.134	98.39	DOWN_AtMSCtrl_UP_AtC32I	UP
AT5G24200	21.6061	2.45882	0.851398	2.88798	0.00387727	0.0161243	39	37	7	6	35.2759	37.8132	7.59524	5.74019	98.39	DOWN_AtMSCtrl_UP_AtC32I	UP
AT3G51030	15.7402	2.95899	1.02854	2.87689	0.00401612	0.0166114	30	28	4	3	27.1353	28.6154	4.34014	2.8701	98.34	DOWN_AtMSCtrl_UP_AtC32I	UP
AT1G78990	23.5575	2.67678	0.931364	2.87404	0.00405257	0.0167215	53	33	1	12	47.9391	33.7253	1.08503	11.4804	98.33	DOWN_AtMSCtrl_UP_AtC32I	UP
AT5G11590	16.5697	2.83438	0.992624	2.85544	0.00429769	0.0175204	36	25	4	4	32.5624	25.5495	4.34014	3.8268	98.25	DOWN_AtMSCtrl_UP_AtC32I	UP
AT2G17280	56.2171	2.13059	0.746617	2.85366	0.00432182	0.0175935	127	67	3	40	114.873	68.4726	3.2551	38.268	98.24	DOWN_AtMSCtrl_UP_AtC32I	UP
AT3G47380	31.3763	2.10038	0.739491	2.84031	0.004507	0.0181862	39	65	14	9	35.2759	66.4286	15.1905	8.61029	98.18	DOWN_AtMSCtrl_UP_AtC32I	UP
AT3G58980	34.3494	2.04635	0.721245	2.83725	0.00455047	0.0183225	66	50	6	21	59.6977	51.0989	6.51021	20.0907	98.17	DOWN_AtMSCtrl_UP_AtC32I	UP
AT2G10931	25.1508	2.30772	0.821658	2.80862	0.0049755	0.0196753	52	36	4	13	47.0346	36.7912	4.34014	12.4371	98.03	DOWN_AtMSCtrl_UP_AtC32I	UP
AT5G64750	34.4705	2.0875	0.744703	2.80313	0.00506093	0.0199435	32	81	10	16	28.9444	82.7803	10.8503	15.3072	98.01	DOWN_AtMSCtrl_UP_AtC32I	UP
AT2G34340	15.6734	3.00631	1.07363	2.80014	0.00510801	0.0200965	29	29	1	6	26.2308	29.6374	1.08503	5.74019	97.99	DOWN_AtMSCtrl_UP_AtC32I	UP
AT5G53110	13.6203	3.24225	1.1613	2.7919	0.00523994	0.0205017	25	26	4	1	22.6128	26.5714	4.34014	0.956699	97.95	DOWN_AtMSCtrl_UP_AtC32I	UP
AT3G61750	13.2098	3.26227	1.1689	2.79089	0.00525627	0.0205509	27	23	1	4	24.4218	23.5055	1.08503	3.8268	97.94	DOWN_AtMSCtrl_UP_AtC32I	UP
AT3G21510	17.5896	2.71367	0.972407	2.79068	0.00525976	0.0205556	29	34	6	3	26.2308	34.7473	6.51021	2.8701	97.94	DOWN_AtMSCtrl_UP_AtC32I	UP
AT3G03190	50.2036	4.84049	1.74214	2.77848	0.00546135	0.0211973	131	74	0	7	118.491	75.6264	0	6.69689	97.88	DOWN_AtMSCtrl_UP_AtC32I	UP
AT3G54420	29.5248	2.20867	0.804424	2.74566	0.006039	0.0230708	45	55	16	4	40.703	56.2088	17.3606	3.8268	97.69	DOWN_AtMSCtrl_UP_AtC32I	UP
AT3G21550	30.5126	2.02648	0.74276	2.72831	0.00636603	0.0240287	70	34	8	16	63.3158	34.7473	8.68028	15.3072	97.6	DOWN_AtMSCtrl_UP_AtC32I	UP
AT1G26840	14.8617	3.1878	1.1685	2.72812	0.00636958	0.0240368	30	26	0	6	27.1353	26.5714	0	5.74019	97.6	DOWN_AtMSCtrl_UP_AtC32I	UP
AT5G36925	12.8456	3.21695	1.18293	2.71948	0.00653856	0.0245492	22	26	1	4	19.8992	26.5714	1.08503	3.8268	97.55	DOWN_AtMSCtrl_UP_AtC32I	UP
AT3G29639	12.5929	3.16222	1.16453	2.71545	0.00661854	0.0247947	23	24	2	3	20.8038	24.5275	2.17007	2.8701	97.52	DOWN_AtMSCtrl_UP_AtC32I	UP
AT2G29130	18.9822	2.57597	0.952136	2.70547	0.00682083	0.0253834	37	31	2	9	33.4669	31.6813	2.17007	8.61029	97.46	DOWN_AtMSCtrl_UP_AtC32I	UP
AT2G13550	22.7756	2.39225	0.884347	2.70511	0.00682822	0.0254012	28	50	10	4	25.3263	51.0989	10.8503	3.8268	97.46	DOWN_AtMSCtrl_UP_AtC32I	UP
AT4G31400	20.8678	2.30069	0.865357	2.65866	0.00784531	0.0283177	44	29	5	9	39.7985	29.6374	5.42517	8.61029	97.17	DOWN_AtMSCtrl_UP_AtC32I	UP
AT4G31730	23.1002	2.31448	0.872324	2.65323	0.00797257	0.0286797	24	54	9	6	21.7083	55.1869	9.76531	5.74019	97.13	DOWN_AtMSCtrl_UP_AtC32I	UP
AT5G46530	19.9672	2.31103	0.883501	2.61576	0.00890284	0.0313953	35	34	8	5	31.6579	34.7473	8.68028	4.78349	96.86	DOWN_AtMSCtrl_UP_AtC32I	UP
AT2G01280	24.4241	2.59221	1.0111	2.56375	0.010355	0.0356296	54	34	13	0	48.8436	34.7473	14.1055	0	96.44	DOWN_AtMSCtrl_UP_AtC32I	UP
AT5G60660	19.8715	2.40748	0.953603	2.52462	0.0115824	0.0389702	41	29	10	2	37.0849	29.6374	10.8503	1.9134	96.1	DOWN_AtMSCtrl_UP_AtC32I	UP
AT3G52630	19.7986	2.1969	0.870893	2.52259	0.0116495	0.0391417	38	30	6	8	34.3714	30.6594	6.51021	7.65359	96.09	DOWN_AtMSCtrl_UP_AtC32I	UP
AT1G63040	16.3936	2.48634	1.00401	2.47641	0.0132712	0.0434738	30	28	2	8	27.1353	28.6154	2.17007	7.65359	95.65	DOWN_AtMSCtrl_UP_AtC32I	UP
AT3G44220	18.7376	2.24798	0.914049	2.45936	0.0139184	0.045098	29	35	4	9	26.2308	35.7693	4.34014	8.61029	95.49	DOWN_AtMSCtrl_UP_AtC32I	UP
AT5G28442	22.0963	2.07093	0.842471	2.45817	0.0139648	0.0452148	44	31	5	12	39.7985	31.6813	5.42517	11.4804	95.48	DOWN_AtMSCtrl_UP_AtC32I	UP
AT1G19970	27.7433	2.00977	0.821517	2.44641	0.0144285	0.0463265	54	39	17	4	48.8436	39.8572	18.4456	3.8268	95.37	DOWN_AtMSCtrl_UP_AtC32I	UP
AT3G11340	20.857	2.34831	0.967784	2.42648	0.0152462	0.0484415	40	33	1	13	36.1804	33.7253	1.08503	12.4371	95.16	DOWN_AtMSCtrl_UP_AtC32I	UP
AT5G56050	19.0067	2.21254	0.913293	2.4226	0.01541	0.0488253	34	31	9	4	30.7534	31.6813	9.76531	3.8268	95.12	DOWN_AtMSCtrl_UP_AtC32I	UP

## Sheet: AtMSCtrl-vs-AtC32I-DOWN
	baseMean	log2FoldChange	lfcSE	stat	pvalue	padj	AtC32I_1	AtC32I_2	AtMSCtrl_1	AtMSCtrl_2	AtC32I_1.1	AtC32I_2.1	AtMSCtrl_1.1	AtMSCtrl_2.1	Certeza	DE	Regulation_Type
AT3G05900	3197.83	-3.72806	0.225184	-16.5556	1.46e-61	8.27e-58	522	416	5929	5708	472.155	425.143	6433.17	5460.84	100	UP_AtMSCtrl_DOWN_AtC32I	DOWN
AT1G20970	1790.25	-3.77992	0.248603	-15.2046	3.29e-52	1.12e-48	236	267	3405	3115	213.465	272.868	3694.54	2980.12	100	UP_AtMSCtrl_DOWN_AtC32I	DOWN
AT5G40450	12760.8	-3.71252	0.250523	-14.8191	1.1e-49	3.13e-46	1587	2136	23745	22641	1435.46	2182.95	25764.1	21660.6	100	UP_AtMSCtrl_DOWN_AtC32I	DOWN
AT4G33150	4219.79	-2.92008	0.214011	-13.6445	2.18e-42	5.29e-39	1092	961	6464	8253	987.726	982.122	7013.66	7895.64	100	UP_AtMSCtrl_DOWN_AtC32I	DOWN
AT3G45300	5316.68	-2.89262	0.215999	-13.3918	6.75e-41	1.43e-37	1279	1338	8474	9980	1156.87	1367.41	9194.58	9547.85	100	UP_AtMSCtrl_DOWN_AtC32I	DOWN
AT4G36520	1041.25	-3.68954	0.280381	-13.159	1.51e-39	2.85e-36	144	166	2110	1647	130.25	169.648	2289.42	1575.68	100	UP_AtMSCtrl_DOWN_AtC32I	DOWN
AT1G03080	936.57	-3.52988	0.268635	-13.14	1.94e-39	3.3e-36	134	174	1657	1724	121.204	177.824	1797.9	1649.35	100	UP_AtMSCtrl_DOWN_AtC32I	DOWN
AT5G40340	1725.07	-3.22103	0.258032	-12.4831	9.23e-36	1.21e-32	319	372	3292	2780	288.539	380.176	3571.93	2659.62	100	UP_AtMSCtrl_DOWN_AtC32I	DOWN
AT5G56870	6084.15	-2.66628	0.213515	-12.4875	8.73e-36	1.21e-32	1695	1741	9488	11215	1533.15	1779.27	10294.8	10729.4	100	UP_AtMSCtrl_DOWN_AtC32I	DOWN
AT2G15880	1939.85	-2.73487	0.221075	-12.3708	3.76e-35	4.57e-32	579	479	3060	3581	523.712	489.528	3320.21	3425.94	100	UP_AtMSCtrl_DOWN_AtC32I	DOWN
AT1G04300	2705.13	-2.79466	0.22815	-12.2492	1.7e-34	1.92e-31	833	596	4570	4703	753.458	609.099	4958.61	4499.35	100	UP_AtMSCtrl_DOWN_AtC32I	DOWN
AT1G65660	1224.15	-2.84327	0.233414	-12.1812	3.91e-34	4.16e-31	331	293	2082	2131	299.393	299.44	2259.04	2038.73	100	UP_AtMSCtrl_DOWN_AtC32I	DOWN
AT1G15940	386.903	-3.78662	0.31617	-11.9765	4.72e-33	4.72e-30	46	62	663	756	41.6075	63.3627	719.378	723.264	100	UP_AtMSCtrl_DOWN_AtC32I	DOWN
AT1G35115	421.127	-3.61601	0.307129	-11.7736	5.34e-32	5.05e-29	78	55	807	713	70.5519	56.2088	875.623	682.126	100	UP_AtMSCtrl_DOWN_AtC32I	DOWN
AT1G67230	1195.25	-2.87633	0.244495	-11.7644	5.96e-32	5.07e-29	277	316	1960	2175	250.55	322.945	2126.67	2080.82	100	UP_AtMSCtrl_DOWN_AtC32I	DOWN
AT5G16780	1302.42	-2.76372	0.234859	-11.7676	5.74e-32	5.07e-29	382	316	2242	2204	345.523	322.945	2432.65	2108.56	100	UP_AtMSCtrl_DOWN_AtC32I	DOWN
AT5G65770	534.932	-3.25616	0.285197	-11.4172	3.43e-30	2.65e-27	99	111	987	905	89.5466	113.44	1070.93	865.812	100	UP_AtMSCtrl_DOWN_AtC32I	DOWN
AT4G19190	640.541	-2.96829	0.260814	-11.3809	5.21e-30	3.85e-27	166	137	1117	1108	150.149	140.011	1211.98	1060.02	100	UP_AtMSCtrl_DOWN_AtC32I	DOWN
AT2G32240	1440.76	-2.59703	0.228676	-11.3568	6.86e-30	4.86e-27	426	423	2313	2546	385.322	432.297	2509.69	2435.76	100	UP_AtMSCtrl_DOWN_AtC32I	DOWN
AT5G66030	1930.07	-2.49817	0.222948	-11.2052	3.85e-29	2.52e-26	634	575	2848	3626	573.46	587.638	3090.18	3468.99	100	UP_AtMSCtrl_DOWN_AtC32I	DOWN
AT1G03090	5380.34	-2.5673	0.230584	-11.1339	8.58e-29	5.21e-26	1491	1721	7882	10308	1348.63	1758.83	8552.24	9861.65	100	UP_AtMSCtrl_DOWN_AtC32I	DOWN
AT3G06400	1739.86	-2.61169	0.238066	-10.9704	5.3e-28	3.11e-25	609	418	2886	2979	550.847	427.187	3131.41	2850.01	100	UP_AtMSCtrl_DOWN_AtC32I	DOWN
AT4G26190	986.843	-2.69098	0.246776	-10.9045	1.1e-27	5.83e-25	307	246	1722	1620	277.685	251.407	1868.43	1549.85	100	UP_AtMSCtrl_DOWN_AtC32I	DOWN
AT1G79280	893.628	-2.71956	0.251516	-10.8127	3e-27	1.54e-24	232	256	1502	1540	209.847	261.627	1629.72	1473.32	100	UP_AtMSCtrl_DOWN_AtC32I	DOWN
AT4G31570	408.051	-3.15913	0.295466	-10.692	1.11e-26	5.39e-24	99	73	615	837	89.5466	74.6045	667.296	800.757	100	UP_AtMSCtrl_DOWN_AtC32I	DOWN
AT1G76810	2754.28	-2.33478	0.218488	-10.6861	1.18e-26	5.59e-24	961	933	4447	4567	869.235	953.506	4825.15	4369.24	100	UP_AtMSCtrl_DOWN_AtC32I	DOWN
AT5G41020	917.313	-2.83939	0.265978	-10.6753	1.33e-26	6.11e-24	223	243	1699	1438	201.706	248.341	1843.47	1375.73	100	UP_AtMSCtrl_DOWN_AtC32I	DOWN
AT5G25060	982.882	-2.50552	0.237972	-10.5287	6.37e-26	2.78e-23	312	300	1588	1693	282.207	306.594	1723.04	1619.69	100	UP_AtMSCtrl_DOWN_AtC32I	DOWN
AT5G16730	808.429	-3.02206	0.288203	-10.4859	1e-25	4.27e-23	154	211	1499	1309	139.295	215.638	1626.47	1252.32	100	UP_AtMSCtrl_DOWN_AtC32I	DOWN
AT1G09770	4118.51	-2.2756	0.219123	-10.385	2.9e-25	1.16e-22	1502	1430	6836	6519	1358.58	1461.43	7417.3	6236.72	100	UP_AtMSCtrl_DOWN_AtC32I	DOWN
AT2G26560	2431.96	-2.29877	0.221428	-10.3815	3.01e-25	1.16e-22	861	846	3514	4465	778.784	864.594	3812.81	4271.66	100	UP_AtMSCtrl_DOWN_AtC32I	DOWN
AT2G46020	1550.21	-2.36722	0.227985	-10.3833	2.96e-25	1.16e-22	566	484	2552	2535	511.953	494.638	2769.01	2425.23	100	UP_AtMSCtrl_DOWN_AtC32I	DOWN
AT5G13010	2109.56	-2.34099	0.225906	-10.3627	3.67e-25	1.39e-22	838	619	3322	3599	757.98	632.605	3604.49	3443.16	100	UP_AtMSCtrl_DOWN_AtC32I	DOWN
AT1G61690	978.93	-2.70905	0.262886	-10.305	6.69e-25	2.47e-22	333	213	1704	1618	301.202	217.681	1848.9	1547.94	100	UP_AtMSCtrl_DOWN_AtC32I	DOWN
AT1G75310	327.579	-3.35791	0.328659	-10.217	1.66e-24	5.9e-22	49	71	555	618	44.321	72.5605	602.194	591.24	100	UP_AtMSCtrl_DOWN_AtC32I	DOWN
AT4G02720	647.203	-2.6212	0.257471	-10.1806	2.42e-24	8.32e-22	199	178	1101	1079	179.998	181.912	1194.62	1032.28	100	UP_AtMSCtrl_DOWN_AtC32I	DOWN
AT1G22930	3931.17	-2.31569	0.227689	-10.1704	2.69e-24	8.96e-22	1643	1119	6170	6690	1486.11	1143.59	6694.66	6400.32	100	UP_AtMSCtrl_DOWN_AtC32I	DOWN
AT1G68790	484.521	-3.07316	0.303229	-10.1348	3.87e-24	1.27e-21	99	114	935	750	89.5466	116.506	1014.51	717.524	100	UP_AtMSCtrl_DOWN_AtC32I	DOWN
AT3G11450	3017.5	-2.3859	0.237603	-10.0416	1e-23	2.99e-21	1145	883	5334	4541	1035.67	902.407	5787.57	4344.37	100	UP_AtMSCtrl_DOWN_AtC32I	DOWN
AT1G08630	1054.25	-3.32775	0.33252	-10.0076	1.41e-23	4.13e-21	126	263	1713	2065	113.968	268.78	1858.66	1975.58	100	UP_AtMSCtrl_DOWN_AtC32I	DOWN
AT1G19835	1368.74	-2.33243	0.234656	-9.93978	2.79e-23	7.92e-21	538	411	2237	2238	486.627	420.033	2427.22	2141.09	100	UP_AtMSCtrl_DOWN_AtC32I	DOWN
AT5G05210	448.69	-2.87833	0.290545	-9.90669	3.89e-23	1.09e-20	99	123	738	814	89.5466	125.703	800.756	778.753	100	UP_AtMSCtrl_DOWN_AtC32I	DOWN
AT4G36980	1746.65	-2.23819	0.227972	-9.81782	9.44e-23	2.59e-20	728	551	2549	3135	658.484	563.11	2765.75	2999.25	100	UP_AtMSCtrl_DOWN_AtC32I	DOWN
AT1G24706	741.112	-2.51952	0.258699	-9.73919	2.05e-22	5.37e-20	275	187	1147	1338	248.741	191.11	1244.53	1280.06	100	UP_AtMSCtrl_DOWN_AtC32I	DOWN
AT3G55610	3336.7	-2.0549	0.212625	-9.6644	4.27e-22	1.1e-19	1486	1218	4904	5683	1344.1	1244.77	5321.01	5436.92	100	UP_AtMSCtrl_DOWN_AtC32I	DOWN
AT1G60200	1856.57	-2.08589	0.218792	-9.53366	1.52e-21	3.8e-19	780	695	2762	3150	705.519	710.275	2996.87	3013.6	100	UP_AtMSCtrl_DOWN_AtC32I	DOWN
AT3G52140	3598.76	-2.09579	0.220598	-9.50049	2.09e-21	5.15e-19	1644	1215	5586	5859	1487.02	1241.7	6061	5605.3	100	UP_AtMSCtrl_DOWN_AtC32I	DOWN
AT1G14690	743.112	-2.31998	0.244696	-9.48105	2.52e-21	6.12e-19	276	241	1145	1290	249.645	246.297	1242.36	1234.14	100	UP_AtMSCtrl_DOWN_AtC32I	DOWN
AT5G20610	883.58	-2.56809	0.27103	-9.47531	2.66e-21	6.37e-19	326	210	1571	1380	294.871	214.616	1704.59	1320.24	100	UP_AtMSCtrl_DOWN_AtC32I	DOWN
AT2G33435	181.357	-3.58499	0.37862	-9.46859	2.84e-21	6.65e-19	29	29	327	329	26.2308	29.6374	354.806	314.754	100	UP_AtMSCtrl_DOWN_AtC32I	DOWN
AT4G38540	2457.66	-2.40474	0.254054	-9.46549	2.92e-21	6.65e-19	682	925	3859	4266	616.876	945.33	4187.15	4081.28	100	UP_AtMSCtrl_DOWN_AtC32I	DOWN
AT5G17900	943.649	-2.28454	0.241363	-9.46518	2.93e-21	6.65e-19	367	304	1541	1526	331.956	310.682	1672.04	1459.92	100	UP_AtMSCtrl_DOWN_AtC32I	DOWN
AT5G55860	435.571	-2.94265	0.310842	-9.46671	2.89e-21	6.65e-19	112	97	862	634	101.305	99.1319	935.3	606.547	100	UP_AtMSCtrl_DOWN_AtC32I	DOWN
AT1G32750	624.477	-2.5073	0.266422	-9.41102	4.91e-21	1.1e-18	233	159	1020	1064	210.751	162.495	1106.74	1017.93	100	UP_AtMSCtrl_DOWN_AtC32I	DOWN
AT2G44200	335.886	-2.94502	0.31365	-9.38951	6.03e-21	1.31e-18	76	84	617	543	68.7428	85.8462	669.466	519.487	100	UP_AtMSCtrl_DOWN_AtC32I	DOWN
AT4G38470	3467.75	-2.03366	0.217279	-9.3597	8e-21	1.72e-18	1396	1429	4983	6001	1262.7	1460.41	5406.73	5741.15	100	UP_AtMSCtrl_DOWN_AtC32I	DOWN
AT1G76720	336.662	-3.12821	0.335315	-9.32918	1.07e-20	2.27e-18	98	48	579	607	88.6421	49.055	628.235	580.716	100	UP_AtMSCtrl_DOWN_AtC32I	DOWN
AT4G11420	2506.27	-2.24082	0.240892	-9.30218	1.38e-20	2.85e-18	1119	722	4030	4079	1012.15	737.869	4372.69	3902.37	100	UP_AtMSCtrl_DOWN_AtC32I	DOWN
AT5G16880	2765.11	-2.00362	0.215524	-9.29651	1.45e-20	2.97e-18	1279	1028	4038	4674	1156.87	1050.59	4381.37	4471.61	100	UP_AtMSCtrl_DOWN_AtC32I	DOWN
AT3G49601	1449.86	-2.8708	0.309166	-9.28564	1.61e-20	3.22e-18	269	445	2775	2185	243.313	454.781	3010.97	2090.39	100	UP_AtMSCtrl_DOWN_AtC32I	DOWN
AT5G07440	2548.68	-2.11931	0.228512	-9.27439	1.79e-20	3.49e-18	933	1041	3936	4198	843.909	1063.88	4270.7	4016.22	100	UP_AtMSCtrl_DOWN_AtC32I	DOWN
AT5G46070	549.792	-2.54804	0.274735	-9.27451	1.78e-20	3.49e-18	182	153	978	854	164.621	156.363	1061.16	817.021	100	UP_AtMSCtrl_DOWN_AtC32I	DOWN
AT2G31970	351.104	-2.75354	0.297064	-9.26918	1.88e-20	3.63e-18	111	79	549	656	100.401	80.7363	595.684	627.594	100	UP_AtMSCtrl_DOWN_AtC32I	DOWN
AT5G63160	4361.36	-2.02729	0.218992	-9.25736	2.1e-20	4e-18	1757	1808	6057	7773	1589.23	1847.74	6572.05	7436.42	100	UP_AtMSCtrl_DOWN_AtC32I	DOWN
AT5G55300	907.287	-2.22825	0.242404	-9.19232	3.84e-20	7.19e-18	371	296	1457	1474	335.574	302.506	1580.9	1410.17	100	UP_AtMSCtrl_DOWN_AtC32I	DOWN
AT5G61160	2373.86	-2.52864	0.275662	-9.17298	4.6e-20	8.51e-18	565	873	3880	4058	511.049	892.187	4209.93	3882.28	100	UP_AtMSCtrl_DOWN_AtC32I	DOWN
AT1G32490	674.883	-2.38153	0.26083	-9.13057	6.81e-20	1.22e-17	261	194	1131	1085	236.077	198.264	1227.17	1038.02	100	UP_AtMSCtrl_DOWN_AtC32I	DOWN
AT5G41790	1953.16	-2.76924	0.304282	-9.10089	8.96e-20	1.55e-17	369	652	3473	3182	333.765	666.33	3768.33	3044.22	100	UP_AtMSCtrl_DOWN_AtC32I	DOWN
AT1G44910	513.818	-2.36699	0.262332	-9.02289	1.83e-19	3.12e-17	187	161	794	899	169.144	164.539	861.518	860.072	100	UP_AtMSCtrl_DOWN_AtC32I	DOWN
AT1G20920	1277.42	-2.30329	0.256107	-8.99347	2.4e-19	4.03e-17	559	347	2078	2085	505.622	354.627	2254.7	1994.72	100	UP_AtMSCtrl_DOWN_AtC32I	DOWN
AT4G27500	3381.64	-2.11545	0.235418	-8.98594	2.57e-19	4.28e-17	1235	1389	5579	5160	1117.07	1419.53	6053.41	4936.57	100	UP_AtMSCtrl_DOWN_AtC32I	DOWN
AT5G58040	1275.59	-2.18363	0.244623	-8.92651	4.4e-19	7.19e-17	443	509	2033	2065	400.698	520.187	2205.88	1975.58	100	UP_AtMSCtrl_DOWN_AtC32I	DOWN
AT2G28290	1566.02	-2.12049	0.237837	-8.91575	4.85e-19	7.85e-17	717	511	2511	2476	648.534	522.231	2724.52	2368.79	100	UP_AtMSCtrl_DOWN_AtC32I	DOWN
AT5G61150	749.831	-2.24447	0.252347	-8.8944	5.87e-19	9.42e-17	274	269	1235	1188	247.836	274.912	1340.02	1136.56	100	UP_AtMSCtrl_DOWN_AtC32I	DOWN
AT2G03150	502.844	-2.36855	0.266472	-8.88858	6.19e-19	9.84e-17	190	151	749	912	171.857	154.319	812.691	872.509	100	UP_AtMSCtrl_DOWN_AtC32I	DOWN
AT1G79830	1909.13	-2.13698	0.240779	-8.87526	6.98e-19	1.1e-16	692	772	3155	2925	625.922	788.968	3423.28	2798.34	100	UP_AtMSCtrl_DOWN_AtC32I	DOWN
AT1G65440	1608.27	-2.01945	0.227618	-8.87213	7.18e-19	1.12e-16	665	657	2510	2547	601.5	671.44	2723.44	2436.71	100	UP_AtMSCtrl_DOWN_AtC32I	DOWN
AT3G01310	3516.03	-2.04778	0.231183	-8.85781	8.16e-19	1.26e-16	1726	1152	5369	5749	1561.19	1177.32	5825.55	5500.06	100	UP_AtMSCtrl_DOWN_AtC32I	DOWN
AT3G58110	715.763	-2.2454	0.253889	-8.84399	9.24e-19	1.42e-16	299	223	1146	1172	270.449	227.901	1243.45	1121.25	100	UP_AtMSCtrl_DOWN_AtC32I	DOWN
AT1G74250	468.962	-2.65737	0.300926	-8.83062	1.04e-18	1.58e-16	118	147	851	727	106.732	150.231	923.364	695.52	100	UP_AtMSCtrl_DOWN_AtC32I	DOWN
AT3G53540	717.613	-2.18474	0.247482	-8.82789	1.07e-18	1.61e-16	274	264	1113	1197	247.836	269.802	1207.64	1145.17	100	UP_AtMSCtrl_DOWN_AtC32I	DOWN
AT4G25730	823.114	-2.26082	0.257067	-8.79467	1.43e-18	2.12e-16	303	288	1419	1238	274.067	294.33	1539.66	1184.39	100	UP_AtMSCtrl_DOWN_AtC32I	DOWN
AT4G16680	239.402	-2.92225	0.33243	-8.79056	1.49e-18	2.18e-16	58	58	359	477	52.4616	59.2748	389.527	456.345	100	UP_AtMSCtrl_DOWN_AtC32I	DOWN
AT4G24680	1107.93	-2.17371	0.247999	-8.765	1.87e-18	2.72e-16	391	441	1793	1758	353.664	450.693	1945.47	1681.88	100	UP_AtMSCtrl_DOWN_AtC32I	DOWN
AT3G57300	1504.98	-2.35158	0.269638	-8.72126	2.75e-18	3.93e-16	675	367	2245	2716	610.545	375.066	2435.9	2598.39	100	UP_AtMSCtrl_DOWN_AtC32I	DOWN
AT5G67480	3407.52	-2.04815	0.236208	-8.67094	4.29e-18	5.97e-16	1684	1106	4744	6093	1523.2	1130.31	5147.4	5829.17	100	UP_AtMSCtrl_DOWN_AtC32I	DOWN
AT1G76820	337.97	-2.64318	0.306389	-8.62689	6.3e-18	8.72e-16	120	76	525	623	108.541	77.6704	569.643	596.023	100	UP_AtMSCtrl_DOWN_AtC32I	DOWN
AT1G24160	2586.57	-2.09782	0.243658	-8.60968	7.33e-18	1e-15	1274	789	3960	4276	1152.35	806.341	4296.74	4090.84	100	UP_AtMSCtrl_DOWN_AtC32I	DOWN
AT4G37120	1470.77	-2.08717	0.243198	-8.58219	9.31e-18	1.25e-15	640	530	2498	2145	578.887	541.649	2710.42	2052.12	100	UP_AtMSCtrl_DOWN_AtC32I	DOWN
AT4G31880	500.737	-2.34968	0.275884	-8.51693	1.64e-17	2.16e-15	168	173	693	964	151.958	176.802	751.929	922.258	100	UP_AtMSCtrl_DOWN_AtC32I	DOWN
AT5G53440	954.046	-2.09377	0.246719	-8.48644	2.13e-17	2.75e-15	422	335	1566	1456	381.704	342.363	1699.16	1392.95	100	UP_AtMSCtrl_DOWN_AtC32I	DOWN
AT5G55660	1086.78	-2.6739	0.315252	-8.48179	2.22e-17	2.84e-15	228	375	2063	1588	206.228	383.242	2238.43	1519.24	100	UP_AtMSCtrl_DOWN_AtC32I	DOWN
AT5G52280	225.691	-3.10971	0.367632	-8.45876	2.7e-17	3.35e-15	67	32	366	431	60.6022	32.7033	397.123	412.337	100	UP_AtMSCtrl_DOWN_AtC32I	DOWN
AT3G23900	594.039	-2.29692	0.271615	-8.45655	2.75e-17	3.39e-15	254	168	858	1091	229.746	171.692	930.96	1043.76	100	UP_AtMSCtrl_DOWN_AtC32I	DOWN
AT4G27260	458.916	-2.26245	0.267886	-8.44557	3.03e-17	3.7e-15	176	154	707	786	159.194	157.385	767.119	751.965	100	UP_AtMSCtrl_DOWN_AtC32I	DOWN
AT5G63320	735.94	-2.36987	0.280824	-8.43896	3.2e-17	3.86e-15	234	260	1342	1056	211.656	265.714	1456.12	1010.27	100	UP_AtMSCtrl_DOWN_AtC32I	DOWN
AT3G56410	989.312	-2.75245	0.326272	-8.43608	3.28e-17	3.93e-15	386	158	1764	1602	349.141	161.473	1914	1532.63	100	UP_AtMSCtrl_DOWN_AtC32I	DOWN
AT2G26650	424.565	-2.41693	0.286726	-8.42941	3.47e-17	4.13e-15	127	150	677	727	114.873	153.297	734.568	695.52	100	UP_AtMSCtrl_DOWN_AtC32I	DOWN
AT1G03910	825.264	-2.05908	0.245016	-8.40383	4.32e-17	5.07e-15	328	335	1271	1341	296.68	342.363	1379.08	1282.93	100	UP_AtMSCtrl_DOWN_AtC32I	DOWN
AT4G14760	271.005	-2.64686	0.316815	-8.3546	6.57e-17	7.58e-15	88	68	464	451	79.597	69.4946	503.456	431.471	100	UP_AtMSCtrl_DOWN_AtC32I	DOWN
AT1G06670	477.982	-2.20898	0.26615	-8.29974	1.04e-16	1.18e-14	195	160	717	830	176.38	163.517	777.97	794.06	100	UP_AtMSCtrl_DOWN_AtC32I	DOWN
AT5G28400	101.872	-4.27619	0.515489	-8.29542	1.08e-16	1.21e-14	14	7	188	192	12.6632	7.15385	203.987	183.686	100	UP_AtMSCtrl_DOWN_AtC32I	DOWN
AT2G13370	848.672	-2.15929	0.260542	-8.2877	1.15e-16	1.28e-14	389	263	1160	1584	351.855	268.78	1258.64	1515.41	100	UP_AtMSCtrl_DOWN_AtC32I	DOWN
AT5G50780	383.44	-2.32276	0.281011	-8.26573	1.39e-16	1.53e-14	139	127	612	642	125.727	129.791	664.041	614.201	100	UP_AtMSCtrl_DOWN_AtC32I	DOWN
AT5G64572	411.881	-2.77304	0.33554	-8.26443	1.4e-16	1.54e-14	96	121	828	563	86.8331	123.659	898.409	538.621	100	UP_AtMSCtrl_DOWN_AtC32I	DOWN
AT2G26570	827.673	-2.16605	0.263844	-8.20958	2.22e-16	2.33e-14	366	266	1419	1221	331.051	271.846	1539.66	1168.13	100	UP_AtMSCtrl_DOWN_AtC32I	DOWN
AT1G15200	830.824	-2.37328	0.289254	-8.20483	2.31e-16	2.41e-14	220	332	1223	1524	198.992	339.297	1327	1458.01	100	UP_AtMSCtrl_DOWN_AtC32I	DOWN
AT3G45830	474.461	-2.53829	0.309703	-8.19589	2.49e-16	2.56e-14	180	113	886	688	162.812	115.484	961.341	658.209	100	UP_AtMSCtrl_DOWN_AtC32I	DOWN
AT3G24080	592.199	-2.22727	0.272174	-8.18323	2.76e-16	2.83e-14	218	215	1023	880	197.183	219.725	1109.99	841.895	100	UP_AtMSCtrl_DOWN_AtC32I	DOWN
AT4G08310	431.791	-2.38764	0.292304	-8.16837	3.13e-16	3.16e-14	126	160	688	735	113.968	163.517	746.504	703.174	100	UP_AtMSCtrl_DOWN_AtC32I	DOWN
AT3G52240	1462.69	-2.08583	0.255378	-8.16763	3.15e-16	3.17e-14	723	451	2365	2268	653.961	460.912	2566.11	2169.79	100	UP_AtMSCtrl_DOWN_AtC32I	DOWN
AT5G67570	495.01	-2.33984	0.287091	-8.15016	3.63e-16	3.64e-14	206	137	675	963	186.329	140.011	732.398	921.301	100	UP_AtMSCtrl_DOWN_AtC32I	DOWN
AT5G23080	691.205	-2.08652	0.25676	-8.12637	4.42e-16	4.35e-14	301	249	1136	1051	272.258	254.473	1232.6	1005.49	100	UP_AtMSCtrl_DOWN_AtC32I	DOWN
AT3G01160	227.035	-2.69123	0.331777	-8.11158	5e-16	4.83e-14	69	58	388	382	62.4113	59.2748	420.993	365.459	100	UP_AtMSCtrl_DOWN_AtC32I	DOWN
AT1G53590	300.942	-2.4773	0.30599	-8.096	5.68e-16	5.4e-14	112	80	454	552	101.305	81.7583	492.606	528.098	100	UP_AtMSCtrl_DOWN_AtC32I	DOWN
AT2G46180	268.981	-2.61037	0.322648	-8.09046	5.94e-16	5.62e-14	97	62	430	479	87.7376	63.3627	466.565	458.259	100	UP_AtMSCtrl_DOWN_AtC32I	DOWN
AT2G38800	2289.67	-2.39552	0.296538	-8.0783	6.57e-16	6.1e-14	1075	479	3639	3918	972.349	489.528	3948.44	3748.35	100	UP_AtMSCtrl_DOWN_AtC32I	DOWN
AT1G50660	609.834	-2.07033	0.257105	-8.05249	8.11e-16	7.42e-14	271	219	966	964	245.122	223.813	1048.14	922.258	100	UP_AtMSCtrl_DOWN_AtC32I	DOWN
AT4G15530	3507.24	-2.24089	0.278286	-8.05246	8.11e-16	7.42e-14	968	1541	5066	6357	875.567	1574.87	5496.79	6081.73	100	UP_AtMSCtrl_DOWN_AtC32I	DOWN
AT5G16720	353.282	-2.49108	0.30941	-8.05104	8.21e-16	7.47e-14	115	107	649	518	104.019	109.352	704.187	495.57	100	UP_AtMSCtrl_DOWN_AtC32I	DOWN
AT3G54670	391.005	-2.36857	0.294528	-8.04193	8.84e-16	8e-14	157	109	663	618	142.008	111.396	719.378	591.24	100	UP_AtMSCtrl_DOWN_AtC32I	DOWN
AT1G10450	468.996	-2.4528	0.305728	-8.02282	1.03e-15	9.3e-14	200	106	705	859	180.902	108.33	764.949	821.804	100	UP_AtMSCtrl_DOWN_AtC32I	DOWN
AT1G28420	503.884	-2.30379	0.287719	-8.00709	1.17e-15	1.05e-13	220	137	838	802	198.992	140.011	909.259	767.272	100	UP_AtMSCtrl_DOWN_AtC32I	DOWN
AT4G26630	4450.73	-2.28667	0.28645	-7.9828	1.43e-15	1.27e-13	1178	1921	7558	6871	1065.51	1963.22	8200.69	6573.48	100	UP_AtMSCtrl_DOWN_AtC32I	DOWN
AT3G19670	492.882	-2.2752	0.28575	-7.96221	1.69e-15	1.47e-13	218	137	703	911	197.183	140.011	762.779	871.553	100	UP_AtMSCtrl_DOWN_AtC32I	DOWN
AT1G03740	2192.12	-2.06284	0.259668	-7.94414	1.96e-15	1.69e-13	1137	650	3474	3456	1028.43	664.286	3769.41	3306.35	100	UP_AtMSCtrl_DOWN_AtC32I	DOWN
AT1G55250	408.16	-2.20073	0.278192	-7.91083	2.56e-15	2.17e-13	152	151	645	670	137.486	154.319	699.847	640.988	100	UP_AtMSCtrl_DOWN_AtC32I	DOWN
AT3G61780	299.312	-2.79126	0.353069	-7.9057	2.66e-15	2.24e-13	110	50	522	502	99.4962	51.0989	566.388	480.263	100	UP_AtMSCtrl_DOWN_AtC32I	DOWN
AT5G16680	524.985	-2.1816	0.276139	-7.90035	2.78e-15	2.33e-13	218	178	900	778	197.183	181.912	976.531	744.312	100	UP_AtMSCtrl_DOWN_AtC32I	DOWN
AT1G09420	387.712	-2.23216	0.283874	-7.86322	3.74e-15	3.09e-13	154	130	541	723	139.295	132.857	587.004	691.693	100	UP_AtMSCtrl_DOWN_AtC32I	DOWN
AT1G12360	1580.4	-2.11622	0.269774	-7.84442	4.35e-15	3.56e-13	812	440	2460	2580	734.463	449.671	2669.19	2468.28	100	UP_AtMSCtrl_DOWN_AtC32I	DOWN
AT3G62150	890.343	-2.09891	0.268489	-7.81747	5.39e-15	4.3e-13	435	274	1473	1348	393.462	280.022	1598.26	1289.63	100	UP_AtMSCtrl_DOWN_AtC32I	DOWN
AT5G17910	510.507	-2.34648	0.300268	-7.81462	5.51e-15	4.36e-13	228	126	852	818	206.228	128.769	924.45	782.58	100	UP_AtMSCtrl_DOWN_AtC32I	DOWN
AT5G53800	501.755	-2.50339	0.323767	-7.73206	1.06e-14	8.11e-13	113	195	803	872	102.21	199.286	871.283	834.241	100	UP_AtMSCtrl_DOWN_AtC32I	DOWN
AT2G21440	545.777	-2.10752	0.274221	-7.68546	1.52e-14	1.14e-12	243	187	920	809	219.796	191.11	998.232	773.969	100	UP_AtMSCtrl_DOWN_AtC32I	DOWN
AT5G04020	193.491	-2.6841	0.349343	-7.68326	1.55e-14	1.15e-12	62	47	292	369	56.0797	48.033	316.83	353.022	100	UP_AtMSCtrl_DOWN_AtC32I	DOWN
AT1G06720	365.467	-2.17966	0.283844	-7.67907	1.6e-14	1.18e-12	152	124	573	602	137.486	126.725	621.725	575.933	100	UP_AtMSCtrl_DOWN_AtC32I	DOWN
AT2G34730	305.406	-2.37036	0.310605	-7.63145	2.32e-14	1.69e-12	127	81	472	535	114.873	82.7803	512.136	511.834	100	UP_AtMSCtrl_DOWN_AtC32I	DOWN
AT2G01100	1781.74	-2.26484	0.297083	-7.6236	2.47e-14	1.79e-12	463	792	2913	2862	418.789	809.407	3160.71	2738.07	100	UP_AtMSCtrl_DOWN_AtC32I	DOWN
AT2G13970	420.358	-2.45158	0.322125	-7.61066	2.73e-14	1.97e-12	185	90	682	713	167.335	91.9781	739.994	682.126	100	UP_AtMSCtrl_DOWN_AtC32I	DOWN
AT1G67120	375.183	-2.24781	0.295567	-7.60508	2.85e-14	2.04e-12	164	110	530	695	148.34	112.418	575.068	664.906	100	UP_AtMSCtrl_DOWN_AtC32I	DOWN
AT1G24460	492.202	-2.19487	0.291058	-7.54099	4.66e-14	3.31e-12	227	144	831	747	205.324	147.165	901.664	714.654	100	UP_AtMSCtrl_DOWN_AtC32I	DOWN
AT4G21400	295.011	-2.41453	0.32122	-7.51674	5.62e-14	3.96e-12	121	75	417	566	109.446	76.6484	452.459	541.492	100	UP_AtMSCtrl_DOWN_AtC32I	DOWN
AT5G18620	300.56	-2.58773	0.344395	-7.51385	5.74e-14	4.04e-12	118	63	401	623	106.732	64.3847	435.099	596.023	100	UP_AtMSCtrl_DOWN_AtC32I	DOWN
AT5G55100	899.773	-2.2572	0.301242	-7.49297	6.73e-14	4.62e-12	447	213	1281	1659	404.316	217.681	1389.93	1587.16	100	UP_AtMSCtrl_DOWN_AtC32I	DOWN
AT5G12400	588.71	-2.28159	0.304708	-7.48779	7e-14	4.78e-12	283	142	948	967	255.977	145.121	1028.61	925.128	100	UP_AtMSCtrl_DOWN_AtC32I	DOWN
AT3G12020	402.662	-2.06258	0.276207	-7.46751	8.17e-14	5.54e-12	180	145	585	695	162.812	148.187	634.745	664.906	100	UP_AtMSCtrl_DOWN_AtC32I	DOWN
AT5G11390	250.785	-2.37336	0.318008	-7.46322	8.44e-14	5.68e-12	89	80	417	406	80.5015	81.7583	452.459	388.42	100	UP_AtMSCtrl_DOWN_AtC32I	DOWN
AT1G13220	262.737	-2.51489	0.337617	-7.44897	9.41e-14	6.27e-12	76	86	483	387	68.7428	87.8902	524.072	370.242	100	UP_AtMSCtrl_DOWN_AtC32I	DOWN
AT1G76892	614.74	-2.61197	0.351507	-7.43076	1.08e-13	7.15e-12	237	128	1293	743	214.369	130.813	1402.95	710.827	100	UP_AtMSCtrl_DOWN_AtC32I	DOWN
AT2G27285	351.163	-2.36915	0.32013	-7.40059	1.36e-13	8.73e-12	103	132	625	521	93.1646	134.901	678.147	498.44	100	UP_AtMSCtrl_DOWN_AtC32I	DOWN
AT1G10070	3917.66	-2.28654	0.309217	-7.39461	1.42e-13	9.1e-12	939	1778	5463	7397	849.336	1817.08	5927.54	7076.7	100	UP_AtMSCtrl_DOWN_AtC32I	DOWN
AT1G15040	83.6476	-4.35258	0.589675	-7.38132	1.57e-13	9.95e-12	4	12	165	146	3.61804	12.2637	179.031	139.678	100	UP_AtMSCtrl_DOWN_AtC32I	DOWN
AT5G14090	353.164	-2.0975	0.28425	-7.37906	1.59e-13	1.01e-11	150	129	544	580	135.677	131.835	590.259	554.885	100	UP_AtMSCtrl_DOWN_AtC32I	DOWN
AT2G46250	568.659	-2.05184	0.279627	-7.33777	2.17e-13	1.36e-11	259	203	983	801	234.268	207.462	1066.59	766.316	100	UP_AtMSCtrl_DOWN_AtC32I	DOWN
AT3G15590	558.067	-2.0127	0.276747	-7.27272	3.52e-13	2.15e-11	284	182	875	878	256.881	186	949.405	839.982	100	UP_AtMSCtrl_DOWN_AtC32I	DOWN
AT4G37820	389.351	-2.13376	0.2936	-7.26757	3.66e-13	2.22e-11	159	142	670	566	143.817	145.121	726.973	541.492	100	UP_AtMSCtrl_DOWN_AtC32I	DOWN
AT4G21410	573.358	-2.10782	0.292947	-7.19523	6.24e-13	3.72e-11	295	161	830	1005	266.831	164.539	900.579	961.482	100	UP_AtMSCtrl_DOWN_AtC32I	DOWN
AT1G64330	446.852	-2.10562	0.293	-7.18643	6.65e-13	3.96e-11	176	174	783	628	159.194	177.824	849.582	600.807	100	UP_AtMSCtrl_DOWN_AtC32I	DOWN
AT1G70060	559.656	-2.20802	0.307276	-7.18578	6.68e-13	3.96e-11	277	144	941	857	250.55	147.165	1021.02	819.891	100	UP_AtMSCtrl_DOWN_AtC32I	DOWN
AT1G72650	861.09	-2.14793	0.298934	-7.1853	6.71e-13	3.96e-11	454	218	1328	1432	410.648	222.791	1440.93	1369.99	100	UP_AtMSCtrl_DOWN_AtC32I	DOWN
AT1G53440	1206.65	-2.18626	0.30771	-7.10494	1.2e-12	6.8e-11	643	281	1759	2142	581.601	287.176	1908.58	2049.25	100	UP_AtMSCtrl_DOWN_AtC32I	DOWN
AT2G22300	1715.36	-2.20854	0.310987	-7.1017	1.23e-12	6.94e-11	918	381	2580	2971	830.341	389.374	2799.39	2842.35	100	UP_AtMSCtrl_DOWN_AtC32I	DOWN
AT4G10930	177.656	-2.84059	0.400328	-7.09564	1.29e-12	7.2e-11	52	39	365	238	47.0346	39.8572	396.038	227.694	100	UP_AtMSCtrl_DOWN_AtC32I	DOWN
AT3G06290	750.044	-2.22012	0.313636	-7.07865	1.46e-12	8.06e-11	381	181	987	1463	344.619	184.978	1070.93	1399.65	100	UP_AtMSCtrl_DOWN_AtC32I	DOWN
AT1G03760	352.621	-2.34736	0.331957	-7.07126	1.54e-12	8.45e-11	164	81	587	567	148.34	82.7803	636.915	542.448	100	UP_AtMSCtrl_DOWN_AtC32I	DOWN
AT3G62330	315.868	-2.11565	0.299496	-7.06402	1.62e-12	8.79e-11	132	115	425	591	119.395	117.528	461.14	565.409	100	UP_AtMSCtrl_DOWN_AtC32I	DOWN
AT5G54280	293.571	-2.10921	0.300391	-7.02154	2.19e-12	1.17e-10	130	101	452	484	117.586	103.22	490.436	463.042	100	UP_AtMSCtrl_DOWN_AtC32I	DOWN
AT3G18100	125.935	-2.99951	0.428363	-7.00228	2.52e-12	1.33e-10	39	20	211	229	35.2759	20.4396	228.942	219.084	100	UP_AtMSCtrl_DOWN_AtC32I	DOWN
AT4G36850	2445.4	-2.1641	0.310225	-6.9759	3.04e-12	1.58e-10	646	1175	3201	4728	584.314	1200.83	3473.2	4523.27	100	UP_AtMSCtrl_DOWN_AtC32I	DOWN
AT4G00930	111.66	-2.99227	0.42947	-6.96736	3.23e-12	1.67e-10	28	24	177	214	25.3263	24.5275	192.051	204.734	100	UP_AtMSCtrl_DOWN_AtC32I	DOWN
AT2G45460	151.007	-2.75627	0.398825	-6.91097	4.81e-12	2.4e-10	53	29	263	252	47.9391	29.6374	285.364	241.088	100	UP_AtMSCtrl_DOWN_AtC32I	DOWN
AT5G57160	253.158	-2.21719	0.320808	-6.91126	4.8e-12	2.4e-10	112	76	398	420	101.305	77.6704	431.844	401.814	100	UP_AtMSCtrl_DOWN_AtC32I	DOWN
AT4G34140	327.162	-2.01483	0.29395	-6.85433	7.16e-12	3.42e-10	148	123	444	593	133.868	125.703	481.755	567.322	100	UP_AtMSCtrl_DOWN_AtC32I	DOWN
AT5G38150	161.841	-2.72262	0.397895	-6.84255	7.78e-12	3.69e-10	61	29	261	292	55.1752	29.6374	283.194	279.356	100	UP_AtMSCtrl_DOWN_AtC32I	DOWN
AT1G03060	775.526	-2.00002	0.292662	-6.8339	8.26e-12	3.86e-10	431	225	1235	1194	389.844	229.945	1340.02	1142.3	100	UP_AtMSCtrl_DOWN_AtC32I	DOWN
AT5G02810	1877.52	-2.13762	0.315701	-6.77102	1.28e-11	5.74e-10	1052	429	2610	3437	951.546	438.429	2831.94	3288.17	100	UP_AtMSCtrl_DOWN_AtC32I	DOWN
AT1G21580	915.889	-2.02047	0.298473	-6.76933	1.29e-11	5.79e-10	520	248	1333	1561	470.346	253.451	1446.35	1493.41	100	UP_AtMSCtrl_DOWN_AtC32I	DOWN
AT1G35112	80.8878	-3.52377	0.521203	-6.76084	1.37e-11	6.08e-10	15	12	158	132	13.5677	12.2637	171.435	126.284	100	UP_AtMSCtrl_DOWN_AtC32I	DOWN
AT4G16630	260.579	-2.30465	0.341352	-6.75153	1.46e-11	6.44e-10	79	102	461	383	71.4564	104.242	500.201	366.416	100	UP_AtMSCtrl_DOWN_AtC32I	DOWN
AT2G26010	444.316	-2.40269	0.356391	-6.74173	1.57e-11	6.84e-10	94	194	653	821	85.024	198.264	708.528	785.45	100	UP_AtMSCtrl_DOWN_AtC32I	DOWN
AT5G04240	468.506	-2.1958	0.326749	-6.72013	1.82e-11	7.82e-10	235	120	831	666	212.56	122.637	901.664	637.161	100	UP_AtMSCtrl_DOWN_AtC32I	DOWN
AT1G19485	337.757	-2.17359	0.327794	-6.63095	3.34e-11	1.38e-09	170	89	465	629	153.767	90.9561	504.541	601.764	100	UP_AtMSCtrl_DOWN_AtC32I	DOWN
AT3G48710	252.782	-2.19397	0.33311	-6.58632	4.51e-11	1.83e-09	121	70	393	422	109.446	71.5385	426.419	403.727	100	UP_AtMSCtrl_DOWN_AtC32I	DOWN
AT5G19310	220.085	-2.34225	0.355668	-6.58551	4.53e-11	1.84e-09	100	53	358	363	90.4511	54.1649	388.442	347.282	100	UP_AtMSCtrl_DOWN_AtC32I	DOWN
AT1G21160	540.95	-2.02407	0.307596	-6.58029	4.7e-11	1.9e-09	302	150	790	920	273.162	153.297	857.177	880.163	100	UP_AtMSCtrl_DOWN_AtC32I	DOWN
AT3G47340	20787.8	-2.24454	0.341514	-6.57233	4.95e-11	1.99e-09	4330	10346	31996	35481	3916.53	10573.4	34716.8	33944.6	100	UP_AtMSCtrl_DOWN_AtC32I	DOWN
AT5G61190	245.244	-2.16632	0.331996	-6.52515	6.79e-11	2.68e-09	117	71	387	400	105.828	72.5605	419.908	382.68	100	UP_AtMSCtrl_DOWN_AtC32I	DOWN
AT3G01320	527.169	-2.08724	0.32311	-6.45983	1.05e-10	4.02e-09	291	135	714	975	263.213	137.967	774.715	932.781	100	UP_AtMSCtrl_DOWN_AtC32I	DOWN
AT4G29940	189.291	-2.37426	0.368361	-6.44548	1.15e-10	4.37e-09	51	75	284	341	46.1301	76.6484	308.15	326.234	100	UP_AtMSCtrl_DOWN_AtC32I	DOWN
AT3G07280	359.37	-2.03983	0.317534	-6.42398	1.33e-10	4.93e-09	194	103	530	608	175.475	105.264	575.068	581.673	100	UP_AtMSCtrl_DOWN_AtC32I	DOWN
AT5G25070	486.96	-2.02639	0.318179	-6.36872	1.91e-10	6.88e-09	269	137	815	711	243.313	140.011	884.303	680.213	100	UP_AtMSCtrl_DOWN_AtC32I	DOWN
AT1G35660	221.544	-2.43255	0.382585	-6.35818	2.04e-10	7.33e-09	104	43	358	376	94.0691	43.9451	388.442	359.719	100	UP_AtMSCtrl_DOWN_AtC32I	DOWN
AT4G08115	81.1939	-3.16299	0.497754	-6.35453	2.09e-10	7.45e-09	18	16	122	167	16.2812	16.3517	132.374	159.769	100	UP_AtMSCtrl_DOWN_AtC32I	DOWN
AT4G14130	205.431	-2.43028	0.383649	-6.33466	2.38e-10	8.38e-09	51	81	374	300	46.1301	82.7803	405.803	287.01	100	UP_AtMSCtrl_DOWN_AtC32I	DOWN
AT1G62310	427.318	-2.50065	0.396467	-6.30734	2.84e-10	9.81e-09	213	62	686	741	192.661	63.3627	744.334	708.914	100	UP_AtMSCtrl_DOWN_AtC32I	DOWN
AT4G18600	292.909	-2.07681	0.330357	-6.28657	3.25e-10	1.1e-08	154	83	413	522	139.295	84.8242	448.119	499.397	100	UP_AtMSCtrl_DOWN_AtC32I	DOWN
AT1G80160	380.419	-2.09788	0.334501	-6.27168	3.57e-10	1.2e-08	109	186	580	631	98.5917	190.088	629.32	603.677	100	UP_AtMSCtrl_DOWN_AtC32I	DOWN
AT3G05270	205.18	-2.20451	0.351957	-6.26357	3.76e-10	1.26e-08	97	57	330	331	87.7376	58.2528	358.061	316.667	100	UP_AtMSCtrl_DOWN_AtC32I	DOWN
AT1G60640	148.595	-2.312	0.371417	-6.22482	4.82e-10	1.58e-08	57	47	225	262	51.5571	48.033	244.133	250.655	100	UP_AtMSCtrl_DOWN_AtC32I	DOWN
AT5G41140	159.48	-2.29178	0.368633	-6.21698	5.07e-10	1.65e-08	52	60	250	270	47.0346	61.3187	271.259	258.309	100	UP_AtMSCtrl_DOWN_AtC32I	DOWN
AT2G15042	597.536	-2.16329	0.35189	-6.14763	7.86e-10	2.46e-08	337	128	790	1147	304.82	130.813	857.177	1097.33	100	UP_AtMSCtrl_DOWN_AtC32I	DOWN
AT1G10320	162.899	-2.26618	0.369291	-6.13656	8.43e-10	2.59e-08	63	54	215	320	56.9842	55.1869	233.282	306.144	100	UP_AtMSCtrl_DOWN_AtC32I	DOWN
AT3G12810	238.368	-2.12114	0.347526	-6.10354	1.04e-09	3.13e-08	122	66	386	373	110.35	67.4506	418.823	356.849	100	UP_AtMSCtrl_DOWN_AtC32I	DOWN
AT3G21295	301.545	-2.06021	0.341155	-6.03893	1.55e-09	4.51e-08	167	80	443	515	151.053	81.7583	480.67	492.7	100	UP_AtMSCtrl_DOWN_AtC32I	DOWN
AT1G15340	1556.28	-2.10465	0.350674	-6.00172	1.95e-09	5.58e-08	368	824	2689	2229	332.86	842.111	2917.66	2132.48	100	UP_AtMSCtrl_DOWN_AtC32I	DOWN
AT3G49620	927.542	-2.17258	0.362335	-5.99607	2.02e-09	5.74e-08	202	481	1262	1742	182.711	491.572	1369.31	1666.57	100	UP_AtMSCtrl_DOWN_AtC32I	DOWN
AT2G40770	229.923	-2.48118	0.414132	-5.99129	2.08e-09	5.89e-08	111	38	304	471	100.401	38.8352	329.851	450.605	100	UP_AtMSCtrl_DOWN_AtC32I	DOWN
AT5G37190	203.229	-2.08694	0.34837	-5.99059	2.09e-09	5.9e-08	102	61	299	349	92.2601	62.3407	324.425	333.888	100	UP_AtMSCtrl_DOWN_AtC32I	DOWN
AT5G44430	450.476	-2.41902	0.403791	-5.99077	2.09e-09	5.9e-08	75	212	679	816	67.8383	216.659	736.739	780.666	100	UP_AtMSCtrl_DOWN_AtC32I	DOWN
AT1G13940	243.872	-2.04787	0.34221	-5.98424	2.17e-09	6.11e-08	126	74	406	361	113.968	75.6264	440.524	345.368	100	UP_AtMSCtrl_DOWN_AtC32I	DOWN
AT2G25350	122.427	-2.46271	0.413989	-5.94873	2.7e-09	7.41e-08	49	30	205	201	44.321	30.6594	222.432	192.296	100	UP_AtMSCtrl_DOWN_AtC32I	DOWN
AT2G19110	269.615	-2.0853	0.358203	-5.82156	5.83e-09	1.5e-07	150	68	431	424	135.677	69.4946	467.65	405.64	100	UP_AtMSCtrl_DOWN_AtC32I	DOWN
AT3G58160	116.76	-2.6262	0.451602	-5.8153	6.05e-09	1.54e-07	49	20	190	205	44.321	20.4396	206.157	196.123	100	UP_AtMSCtrl_DOWN_AtC32I	DOWN
AT2G33440	125.297	-2.42551	0.420666	-5.76589	8.12e-09	2.03e-07	55	28	201	214	49.7481	28.6154	218.092	204.734	100	UP_AtMSCtrl_DOWN_AtC32I	DOWN
AT2G35540	135.976	-2.26049	0.397577	-5.68567	1.3e-08	3.07e-07	54	44	242	196	48.8436	44.9671	262.578	187.513	100	UP_AtMSCtrl_DOWN_AtC32I	DOWN
AT1G49160	135.823	-2.26384	0.399299	-5.66955	1.43e-08	3.34e-07	57	41	240	198	51.5571	41.9011	260.408	189.426	100	UP_AtMSCtrl_DOWN_AtC32I	DOWN
AT2G41210	206.494	-2.00941	0.354771	-5.66395	1.48e-08	3.44e-07	108	65	267	389	97.6872	66.4286	289.704	372.156	100	UP_AtMSCtrl_DOWN_AtC32I	DOWN
AT1G79360	44.2769	-4.26802	0.756361	-5.64284	1.67e-08	3.84e-07	3	6	96	67	2.71353	6.13187	104.163	64.0988	100	UP_AtMSCtrl_DOWN_AtC32I	DOWN
AT1G80810	121.775	-2.29766	0.41096	-5.59096	2.26e-08	5.02e-07	37	48	193	204	33.4669	49.055	209.412	195.167	100	UP_AtMSCtrl_DOWN_AtC32I	DOWN
AT2G30362	35.7945	-8.66045	1.57388	-5.50263	3.74e-08	7.84e-07	0	0	72	68	0	0	78.1225	65.0555	100	UP_AtMSCtrl_DOWN_AtC32I	DOWN
AT4G28040	295.491	-2.01393	0.368812	-5.46059	4.75e-08	9.71e-07	88	152	521	399	79.597	155.341	565.303	381.723	100	UP_AtMSCtrl_DOWN_AtC32I	DOWN
AT3G28030	151.316	-2.10744	0.38939	-5.41216	6.23e-08	1.24e-06	76	44	252	228	68.7428	44.9671	273.429	218.127	100	UP_AtMSCtrl_DOWN_AtC32I	DOWN
AT3G61800	124.784	-2.23481	0.415338	-5.38069	7.42e-08	1.45e-06	58	34	213	189	52.4616	34.7473	231.112	180.816	100	UP_AtMSCtrl_DOWN_AtC32I	DOWN
AT1G03580	314.838	-2.01307	0.37665	-5.34467	9.06e-08	1.73e-06	85	170	398	603	76.8834	173.736	431.844	576.889	100	UP_AtMSCtrl_DOWN_AtC32I	DOWN
AT1G03830	85.2207	-2.51313	0.470515	-5.34123	9.23e-08	1.76e-06	29	24	151	132	26.2308	24.5275	163.84	126.284	100	UP_AtMSCtrl_DOWN_AtC32I	DOWN
AT3G25495	134.891	-2.44082	0.457564	-5.33437	9.59e-08	1.82e-06	62	27	153	303	56.0797	27.5934	166.01	289.88	100	UP_AtMSCtrl_DOWN_AtC32I	DOWN
AT1G69670	147.445	-2.06921	0.388682	-5.32365	1.02e-07	1.91e-06	71	48	254	210	64.2203	49.055	275.599	200.907	100	UP_AtMSCtrl_DOWN_AtC32I	DOWN
AT3G61570	124.631	-2.06165	0.393484	-5.23949	1.61e-07	2.88e-06	49	51	181	215	44.321	52.1209	196.391	205.69	100	UP_AtMSCtrl_DOWN_AtC32I	DOWN
AT3G10010	134.295	-2.02922	0.393143	-5.16152	2.45e-07	4.18e-06	67	44	180	247	60.6022	44.9671	195.306	236.305	100	UP_AtMSCtrl_DOWN_AtC32I	DOWN
AT1G65970	71.4264	-2.7048	0.528856	-5.11443	3.15e-07	5.23e-06	14	25	117	126	12.6632	25.5495	126.949	120.544	100	UP_AtMSCtrl_DOWN_AtC32I	DOWN
AT3G25440	131.108	-2.00798	0.392832	-5.11155	3.2e-07	5.29e-06	49	59	185	229	44.321	60.2967	200.731	219.084	100	UP_AtMSCtrl_DOWN_AtC32I	DOWN
AT5G42400	202.01	-2.00795	0.395273	-5.07992	3.78e-07	6.09e-06	122	49	320	314	110.35	50.077	347.211	300.403	100	UP_AtMSCtrl_DOWN_AtC32I	DOWN
AT4G16910	39.1597	-3.6536	0.720289	-5.07241	3.93e-07	6.3e-06	6	6	57	87	5.42707	6.13187	61.847	83.2328	100	UP_AtMSCtrl_DOWN_AtC32I	DOWN
AT3G31161	31.2567	-4.97679	0.98734	-5.0406	4.64e-07	7.29e-06	2	2	72	45	1.80902	2.04396	78.1225	43.0514	100	UP_AtMSCtrl_DOWN_AtC32I	DOWN
AT1G32900	149.065	-2.11941	0.421044	-5.0337	4.81e-07	7.52e-06	39	75	233	242	35.2759	76.6484	252.813	231.521	100	UP_AtMSCtrl_DOWN_AtC32I	DOWN
AT3G02400	64.0385	-2.75473	0.549239	-5.01554	5.29e-07	8.15e-06	13	21	112	106	11.7586	21.4616	121.524	101.41	100	UP_AtMSCtrl_DOWN_AtC32I	DOWN
AT5G27240	92.7281	-2.44292	0.489563	-4.99001	6.04e-07	9.16e-06	42	19	117	195	37.9895	19.4176	126.949	186.556	100	UP_AtMSCtrl_DOWN_AtC32I	DOWN
AT2G19260	116.75	-2.00802	0.408115	-4.92024	8.64e-07	1.26e-05	53	44	194	171	47.9391	44.9671	210.497	163.596	100	UP_AtMSCtrl_DOWN_AtC32I	DOWN
AT2G01029	60.2597	-2.68804	0.547592	-4.90884	9.16e-07	1.33e-05	21	13	91	115	18.9947	13.2857	98.7382	110.02	100	UP_AtMSCtrl_DOWN_AtC32I	DOWN
AT4G25580	49.2364	-3.33363	0.695488	-4.79322	1.64e-06	2.22e-05	3	15	82	94	2.71353	15.3297	88.9728	89.9297	100	UP_AtMSCtrl_DOWN_AtC32I	DOWN
AT3G04160	183.675	-2.04452	0.437216	-4.67623	2.92e-06	3.64e-05	114	39	220	369	103.114	39.8572	238.708	353.022	100	UP_AtMSCtrl_DOWN_AtC32I	DOWN
AT1G76780	29.1217	-4.86989	1.04748	-4.64914	3.33e-06	4.08e-05	2	2	80	27	1.80902	2.04396	86.8028	25.8309	100	UP_AtMSCtrl_DOWN_AtC32I	DOWN
AT4G26140	95.3409	-2.13028	0.459063	-4.64051	3.48e-06	4.23e-05	41	33	176	125	37.0849	33.7253	190.966	119.587	100	UP_AtMSCtrl_DOWN_AtC32I	DOWN
AT4G28230	74.8687	-2.43086	0.523981	-4.63921	3.5e-06	4.25e-05	17	31	133	113	15.3767	31.6813	144.31	108.107	100	UP_AtMSCtrl_DOWN_AtC32I	DOWN
AT2G39300	65.8641	-2.70707	0.590251	-4.5863	4.51e-06	5.31e-05	26	11	142	78	23.5173	11.2418	154.075	74.6225	99.99	UP_AtMSCtrl_DOWN_AtC32I	DOWN
AT5G04320	100.589	-2.042	0.447603	-4.56208	5.06e-06	5.88e-05	55	28	154	164	49.7481	28.6154	167.095	156.899	99.99	UP_AtMSCtrl_DOWN_AtC32I	DOWN
AT2G15040	168.343	-2.00985	0.445397	-4.5125	6.41e-06	7.16e-05	107	36	203	334	96.7827	36.7912	220.262	319.537	99.99	UP_AtMSCtrl_DOWN_AtC32I	DOWN
AT2G37080	87.6862	-2.08305	0.488329	-4.26567	1.99e-05	0.00019098	50	21	141	137	45.2255	21.4616	152.99	131.068	99.98	UP_AtMSCtrl_DOWN_AtC32I	DOWN
AT5G60030	170.103	-2.03141	0.478557	-4.24486	2.19e-05	0.00020679	32	103	238	301	28.9444	105.264	258.238	287.966	99.98	UP_AtMSCtrl_DOWN_AtC32I	DOWN
AT5G28390	44.3733	-2.66027	0.635131	-4.18854	2.81e-05	0.00025454	10	15	60	92	9.04511	15.3297	65.1021	88.0163	99.97	UP_AtMSCtrl_DOWN_AtC32I	DOWN
AT5G45820	65.5349	-2.12885	0.508359	-4.1877	2.82e-05	0.00025521	29	22	105	104	26.2308	22.4835	113.929	99.4967	99.97	UP_AtMSCtrl_DOWN_AtC32I	DOWN
AT2G21460	81.7394	-2.04921	0.495465	-4.13593	3.54e-05	0.00031106	42	25	92	171	37.9895	25.5495	99.8232	163.596	99.97	UP_AtMSCtrl_DOWN_AtC32I	DOWN
AT3G05130	52.9606	-2.34538	0.568498	-4.12558	3.7e-05	0.00032254	16	20	89	84	14.4722	20.4396	96.5681	80.3627	99.97	UP_AtMSCtrl_DOWN_AtC32I	DOWN
AT1G17250	64.1169	-2.23838	0.545841	-4.10078	4.12e-05	0.00035441	17	29	112	94	15.3767	29.6374	121.524	89.9297	99.96	UP_AtMSCtrl_DOWN_AtC32I	DOWN
AT3G66652	54.2908	-2.29889	0.560945	-4.09825	4.16e-05	0.00035758	18	20	94	82	16.2812	20.4396	101.993	78.4493	99.96	UP_AtMSCtrl_DOWN_AtC32I	DOWN
AT4G26095	65.5291	-2.69065	0.658744	-4.08452	4.42e-05	0.00037654	24	13	167	48	21.7083	13.2857	181.201	45.9215	99.96	UP_AtMSCtrl_DOWN_AtC32I	DOWN
AT1G29560	23.22	-3.68527	0.913918	-4.03239	5.52e-05	0.00045652	4	3	38	47	3.61804	3.06594	41.2313	44.9648	99.95	UP_AtMSCtrl_DOWN_AtC32I	DOWN
AT5G45472	89.3429	-2.16066	0.539965	-4.00149	6.29e-05	0.00051077	56	14	139	148	50.6526	14.3077	150.82	141.591	99.95	UP_AtMSCtrl_DOWN_AtC32I	DOWN
AT3G15950	93.0826	-2.15529	0.544651	-3.95719	7.58e-05	0.00059686	16	53	130	170	14.4722	54.1649	141.055	162.639	99.94	UP_AtMSCtrl_DOWN_AtC32I	DOWN
AT5G61920	58.3366	-2.05085	0.532377	-3.85224	0.00011704	0.00087233	22	25	85	100	19.8992	25.5495	92.2279	95.6699	99.91	UP_AtMSCtrl_DOWN_AtC32I	DOWN
AT1G09040	59.6929	-2.21728	0.585317	-3.78817	0.00015176	0.00109093	34	11	102	90	30.7534	11.2418	110.674	86.1029	99.89	UP_AtMSCtrl_DOWN_AtC32I	DOWN
AT3G22790	59.1716	-2.06169	0.547402	-3.76631	0.00016568	0.00117165	18	29	85	103	16.2812	29.6374	92.2279	98.54	99.88	UP_AtMSCtrl_DOWN_AtC32I	DOWN
AT5G32481	100.989	-2.20188	0.589822	-3.73312	0.00018912	0.00131718	68	10	166	159	61.5067	10.2198	180.116	152.115	99.87	UP_AtMSCtrl_DOWN_AtC32I	DOWN
AT1G64320	17.9386	-4.16105	1.11688	-3.72559	0.00019486	0.00135271	3	1	38	28	2.71353	1.02198	41.2313	26.7876	99.86	UP_AtMSCtrl_DOWN_AtC32I	DOWN
AT4G13540	33.7539	-2.73362	0.73829	-3.70264	0.00021337	0.00145508	5	13	56	59	4.52255	13.2857	60.7619	56.4452	99.85	UP_AtMSCtrl_DOWN_AtC32I	DOWN
AT1G25053	44.1338	-2.31954	0.627824	-3.69457	0.00022026	0.00149258	20	11	81	62	18.0902	11.2418	87.8878	59.3153	99.85	UP_AtMSCtrl_DOWN_AtC32I	DOWN
AT3G19650	77.8974	-2.03361	0.551759	-3.68569	0.00022808	0.00153511	16	46	115	131	14.4722	47.011	124.779	125.328	99.85	UP_AtMSCtrl_DOWN_AtC32I	DOWN
AT4G11080	32.0847	-2.85533	0.782082	-3.65093	0.00026129	0.0017154	6	10	73	35	5.42707	10.2198	79.2075	33.4845	99.83	UP_AtMSCtrl_DOWN_AtC32I	DOWN
AT5G05490	22.5818	-3.23304	0.888168	-3.64013	0.00027251	0.00177756	4	5	32	49	3.61804	5.10989	34.7211	46.8782	99.82	UP_AtMSCtrl_DOWN_AtC32I	DOWN
AT3G28370	45.4344	-2.27648	0.629793	-3.61466	0.00030075	0.0019295	24	9	72	76	21.7083	9.19781	78.1225	72.7091	99.81	UP_AtMSCtrl_DOWN_AtC32I	DOWN
AT5G14470	44.8709	-2.18302	0.614961	-3.54985	0.00038546	0.00237789	21	13	81	62	18.9947	13.2857	87.8878	59.3153	99.76	UP_AtMSCtrl_DOWN_AtC32I	DOWN
AT5G45520	27.807	-2.73092	0.781621	-3.49391	0.00047599	0.0028208	6	9	52	42	5.42707	9.19781	56.4218	40.1814	99.72	UP_AtMSCtrl_DOWN_AtC32I	DOWN
AT5G15845	35.3053	-2.63594	0.77698	-3.39254	0.00069247	0.00386102	18	3	70	48	16.2812	3.06594	75.9524	45.9215	99.61	UP_AtMSCtrl_DOWN_AtC32I	DOWN
AT5G61610	56.9409	-2.04846	0.605196	-3.38478	0.00071235	0.0039516	12	33	93	86	10.8541	33.7253	100.908	82.2761	99.6	UP_AtMSCtrl_DOWN_AtC32I	DOWN
AT5G23700	30.4122	-2.49727	0.738356	-3.3822	0.00071908	0.00398506	9	10	37	66	8.1406	10.2198	40.1463	63.1421	99.6	UP_AtMSCtrl_DOWN_AtC32I	DOWN
AT5G45830	17.525	-3.47646	1.03891	-3.34626	0.00081908	0.00444256	3	3	39	23	2.71353	3.06594	42.3164	22.0041	99.56	UP_AtMSCtrl_DOWN_AtC32I	DOWN
AT2G01040	22.5357	-2.89317	0.866737	-3.338	0.00084385	0.00454326	4	7	37	41	3.61804	7.15385	40.1463	39.2247	99.55	UP_AtMSCtrl_DOWN_AtC32I	DOWN
AT2G15800	19.6231	-3.47217	1.05472	-3.29203	0.00099466	0.00521613	7	0	33	38	6.33158	0	35.8061	36.3546	99.48	UP_AtMSCtrl_DOWN_AtC32I	DOWN
AT4G04655	25.9418	-2.51261	0.783356	-3.20749	0.00133897	0.00667779	7	9	39	48	6.33158	9.19781	42.3164	45.9215	99.33	UP_AtMSCtrl_DOWN_AtC32I	DOWN
AT1G66040	30.004	-2.30906	0.723549	-3.1913	0.00141633	0.00700058	11	10	40	59	9.94962	10.2198	43.4014	56.4452	99.3	UP_AtMSCtrl_DOWN_AtC32I	DOWN
AT2G41550	34.0901	-2.25949	0.708848	-3.18754	0.00143486	0.00707983	18	7	45	67	16.2812	7.15385	48.8266	64.0988	99.29	UP_AtMSCtrl_DOWN_AtC32I	DOWN
AT5G35670	33.6722	-2.15047	0.681679	-3.15467	0.00160681	0.00778372	16	10	52	56	14.4722	10.2198	56.4218	53.5751	99.22	UP_AtMSCtrl_DOWN_AtC32I	DOWN
AT1G64660	2768.36	-2.23211	0.723875	-3.08356	0.00204543	0.00946632	542	1422	4556	4376	490.245	1453.25	4943.42	4186.51	99.05	UP_AtMSCtrl_DOWN_AtC32I	DOWN
AT5G28330	19.807	-2.82651	0.943657	-2.99528	0.00274195	0.012066	3	7	41	26	2.71353	7.15385	44.4864	24.8742	98.79	UP_AtMSCtrl_DOWN_AtC32I	DOWN
AT5G49700	23.3839	-2.53789	0.868702	-2.92148	0.00348378	0.014754	4	10	47	30	3.61804	10.2198	50.9966	28.701	98.52	UP_AtMSCtrl_DOWN_AtC32I	DOWN
AT3G17280	14.4182	-3.20728	1.11822	-2.8682	0.00412814	0.0169757	5	1	26	25	4.52255	1.02198	28.2109	23.9175	98.3	UP_AtMSCtrl_DOWN_AtC32I	DOWN
AT1G74350	17.9189	-2.73224	0.980115	-2.78767	0.00530885	0.0207284	8	2	24	38	7.23609	2.04396	26.0408	36.3546	97.93	UP_AtMSCtrl_DOWN_AtC32I	DOWN
AT1G53180	24.4394	-2.2307	0.808111	-2.76038	0.00577337	0.0222057	11	7	47	31	9.94962	7.15385	50.9966	29.6577	97.78	UP_AtMSCtrl_DOWN_AtC32I	DOWN
AT3G47230	20.5657	-2.35315	0.860011	-2.73619	0.00621547	0.023565	7	7	29	39	6.33158	7.15385	31.466	37.3113	97.64	UP_AtMSCtrl_DOWN_AtC32I	DOWN
AT5G49680	28.2212	-2.07437	0.791312	-2.62143	0.00875608	0.0309355	17	6	56	32	15.3767	6.13187	60.7619	30.6144	96.91	UP_AtMSCtrl_DOWN_AtC32I	DOWN
AT1G47950	12.613	-2.97292	1.13759	-2.61335	0.00896585	0.0315651	4	2	21	23	3.61804	2.04396	22.7857	22.0041	96.84	UP_AtMSCtrl_DOWN_AtC32I	DOWN
AT4G08100	20.9316	-2.7204	1.06257	-2.56021	0.0104609	0.0359359	12	0	46	24	10.8541	0	49.9116	22.9608	96.41	UP_AtMSCtrl_DOWN_AtC32I	DOWN
AT1G03540	15.8277	-2.50911	0.993249	-2.52616	0.0115316	0.0388759	7	3	25	28	6.33158	3.06594	27.1259	26.7876	96.11	UP_AtMSCtrl_DOWN_AtC32I	DOWN
AT2G31910	14.8293	-2.52309	1.03627	-2.4348	0.0149002	0.0475732	3	6	28	21	2.71353	6.13187	30.381	20.0907	95.24	UP_AtMSCtrl_DOWN_AtC32I	DOWN
AT3G18010	18.4485	-2.37779	0.984458	-2.41533	0.015721	0.0496349	2	10	34	26	1.80902	10.2198	36.8912	24.8742	95.04	UP_AtMSCtrl_DOWN_AtC32I	DOWN
AT3G51540	14.3361	-2.48388	1.02852	-2.415	0.015735	0.0496698	4	5	21	27	3.61804	5.10989	22.7857	25.8309	95.03	UP_AtMSCtrl_DOWN_AtC32I	DOWN

## Sheet: AtMSBc-vs-AtC32IBc-UP
	baseMean	log2FoldChange	lfcSE	stat	pvalue	padj	AtC32IBc_1	AtC32IBc_2	AtMSBc_1	AtMSBc_2	AtC32IBc_1.1	AtC32IBc_2.1	AtMSBc_1.1	AtMSBc_2.1	Certeza	DE	Regulation_Type
AT5G20630	6492.12	2.02281	0.160063	12.6376	1.30948e-36	1.3272e-32	10860	13506	2834	1727	9250.13	11588.8	2491.18	2638.31	100	DOWN_AtMSBc_UP_AtC32IBc	UP
AT4G37800	1025.57	2.07044	0.17939	11.5416	8.14388e-31	3.40068e-27	1786	2088	441	263	1521.25	1791.61	387.653	401.781	100	DOWN_AtMSBc_UP_AtC32IBc	UP
AT1G52000	2495.57	2.08282	0.186043	11.1954	4.29417e-29	1.43451e-25	5538	3916	1128	598	4717.05	3360.13	991.549	913.554	100	DOWN_AtMSBc_UP_AtC32IBc	UP
AT4G30650	409.869	2.18023	0.230122	9.47422	2.68761e-21	2.49395e-18	820	748	144	113	698.444	641.823	126.581	172.628	100	DOWN_AtMSBc_UP_AtC32IBc	UP
AT3G25760	1003.81	2.34201	0.248298	9.43224	4.01439e-21	3.52907e-18	2549	1377	354	230	2171.14	1181.54	311.178	351.367	100	DOWN_AtMSBc_UP_AtC32IBc	UP
AT5G65080	208.941	2.47549	0.292703	8.45734	2.7354e-17	1.01532e-14	479	350	72	42	407.994	300.318	63.2904	64.1627	100	DOWN_AtMSBc_UP_AtC32IBc	UP
AT2G43550	361.464	2.1255	0.251615	8.44744	2.97759e-17	1.08119e-14	789	585	132	102	672.04	501.96	116.032	155.824	100	DOWN_AtMSBc_UP_AtC32IBc	UP
AT3G28270	289.263	2.00331	0.258879	7.73843	1.00652e-14	1.82738e-12	626	459	140	70	533.202	393.846	123.065	106.938	100	DOWN_AtMSBc_UP_AtC32IBc	UP
AT1G19610	144.613	2.07541	0.322745	6.43047	1.27208e-10	9.11911e-09	310	238	68	33	264.046	204.216	59.7742	50.4135	100	DOWN_AtMSBc_UP_AtC32IBc	UP
AT1G54020	54.3864	5.59633	0.886399	6.31355	2.72704e-10	1.83668e-08	180	70	3	1	153.317	60.0636	2.6371	1.52768	100	DOWN_AtMSBc_UP_AtC32IBc	UP
AT1G28370	85.0699	2.75907	0.44717	6.17008	6.8255e-10	4.20687e-08	135	213	31	10	114.988	182.765	27.25	15.2768	100	DOWN_AtMSBc_UP_AtC32IBc	UP
AT1G76790	57.953	3.61364	0.60026	6.02012	1.74284e-09	9.5445e-08	171	79	7	8	145.651	67.7861	6.15323	12.2215	100	DOWN_AtMSBc_UP_AtC32IBc	UP
AT1G31173	117.224	2.02628	0.3408	5.94567	2.75334e-09	1.42823e-07	236	204	50	32	201.016	175.043	43.9516	48.8858	100	DOWN_AtMSBc_UP_AtC32IBc	UP
AT2G39250	60.5858	2.86404	0.501984	5.70544	1.1604e-08	5.08719e-07	137	111	12	13	116.691	95.2438	10.5484	19.8599	100	DOWN_AtMSBc_UP_AtC32IBc	UP
AT1G25145	94.7436	9.79597	1.78297	5.49418	3.92531e-08	1.46677e-06	318	126	0	0	270.86	108.115	0	0	100	DOWN_AtMSBc_UP_AtC32IBc	UP
AT1G24070	58.3264	3.70299	0.682103	5.42879	5.67384e-08	2.02068e-06	203	50	6	8	172.908	42.9026	5.2742	12.2215	100	DOWN_AtMSBc_UP_AtC32IBc	UP
AT3G25770	1598.09	2.46589	0.456225	5.40499	6.4812e-08	2.26476e-06	4153	2185	512	347	3537.36	1874.84	450.065	530.106	100	DOWN_AtMSBc_UP_AtC32IBc	UP
AT1G54010	61.5709	3.30825	0.621628	5.32191	1.02681e-07	3.37614e-06	206	56	12	8	175.463	48.0509	10.5484	12.2215	100	DOWN_AtMSBc_UP_AtC32IBc	UP
AT5G52320	64.8802	2.49057	0.475564	5.23709	1.63132e-07	5.06466e-06	131	125	15	18	111.581	107.256	13.1855	27.4983	100	DOWN_AtMSBc_UP_AtC32IBc	UP
AT1G60590	43.9807	3.17819	0.645707	4.92203	8.56498e-07	2.11942e-05	123	64	15	2	104.767	54.9153	13.1855	3.05537	100	DOWN_AtMSBc_UP_AtC32IBc	UP
AT4G39510	29.7574	3.57711	0.748789	4.7772	1.77756e-06	3.92214e-05	68	60	4	4	57.9198	51.4831	3.51613	6.11073	100	DOWN_AtMSBc_UP_AtC32IBc	UP
AT4G27657	48.5059	2.6608	0.557018	4.77686	1.7805e-06	3.92344e-05	70	126	16	8	59.6233	108.115	14.0645	12.2215	100	DOWN_AtMSBc_UP_AtC32IBc	UP
AT2G42530	99.3951	2.06626	0.438435	4.7128	2.44332e-06	5.12054e-05	245	133	59	15	208.681	114.121	51.8629	22.9152	99.99	DOWN_AtMSBc_UP_AtC32IBc	UP
AT2G30766	36.5299	3.06538	0.65281	4.69567	2.65728e-06	5.52047e-05	80	74	13	2	68.1409	63.4958	11.4274	3.05537	99.99	DOWN_AtMSBc_UP_AtC32IBc	UP
AT1G34640	50.648	2.39787	0.512766	4.67634	2.92035e-06	5.97157e-05	92	108	22	8	78.362	92.6696	19.3387	12.2215	99.99	DOWN_AtMSBc_UP_AtC32IBc	UP
AT1G74430	72.7796	2.0964	0.448303	4.67631	2.92089e-06	5.97157e-05	175	101	30	19	149.058	86.6632	26.371	29.026	99.99	DOWN_AtMSBc_UP_AtC32IBc	UP
AT5G51720	72.1873	2.23381	0.483969	4.6156	3.91962e-06	7.63046e-05	136	145	43	7	115.84	124.418	37.7984	10.6938	99.99	DOWN_AtMSBc_UP_AtC32IBc	UP
AT4G13410	26.3922	4.15339	0.905695	4.58586	4.52124e-06	8.65043e-05	82	35	3	2	69.8444	30.0318	2.6371	3.05537	99.99	DOWN_AtMSBc_UP_AtC32IBc	UP
AT5G15500	41.6708	2.55987	0.561952	4.55531	5.23075e-06	9.76193e-05	78	89	15	7	66.4374	76.3666	13.1855	10.6938	99.99	DOWN_AtMSBc_UP_AtC32IBc	UP
AT5G05340	23.1965	5.249	1.18572	4.42684	9.56249e-06	0.00016265	58	47	0	2	49.4021	40.3284	0	3.05537	99.98	DOWN_AtMSBc_UP_AtC32IBc	UP
AT3G09260	26.2662	3.52461	0.807998	4.36216	1.28786e-05	0.000210275	69	45	7	1	58.7715	38.6123	6.15323	1.52768	99.98	DOWN_AtMSBc_UP_AtC32IBc	UP
AT3G27400	27.4518	3.27777	0.778382	4.211	2.54238e-05	0.000380856	37	79	5	4	31.5152	67.7861	4.39516	6.11073	99.96	DOWN_AtMSBc_UP_AtC32IBc	UP
AT1G53035	65.9016	2.00997	0.478558	4.20007	2.66836e-05	0.000394073	114	135	42	9	97.1008	115.837	36.9194	13.7491	99.96	DOWN_AtMSBc_UP_AtC32IBc	UP
AT2G17740	49.1989	2.31902	0.552598	4.19657	2.70986e-05	0.000398441	125	66	14	14	106.47	56.6314	12.3065	21.3876	99.96	DOWN_AtMSBc_UP_AtC32IBc	UP
AT5G48490	52.7591	2.08334	0.498032	4.18315	2.87503e-05	0.000420505	107	94	29	9	91.1384	80.6569	25.492	13.7491	99.96	DOWN_AtMSBc_UP_AtC32IBc	UP
AT5G59320	30.8624	3.09766	0.744595	4.16019	3.17986e-05	0.000458663	94	36	9	3	80.0655	30.8899	7.91129	4.58305	99.95	DOWN_AtMSBc_UP_AtC32IBc	UP
AT2G39330	163.78	3.20205	0.776244	4.12505	3.70652e-05	0.000522888	511	181	30	25	435.25	155.307	26.371	38.1921	99.95	DOWN_AtMSBc_UP_AtC32IBc	UP
AT4G23600	1208.51	2.23574	0.56431	3.96191	7.43532e-05	0.000930976	2887	1780	330	365	2459.03	1527.33	290.081	557.604	99.91	DOWN_AtMSBc_UP_AtC32IBc	UP
AT1G67260	10.8993	6.67617	1.70299	3.92026	8.8454e-05	0.00107764	26	25	0	0	22.1458	21.4513	0	0	99.89	DOWN_AtMSBc_UP_AtC32IBc	UP
AT1G45010	34.7436	2.36522	0.605687	3.90502	9.42161e-05	0.00113215	78	58	12	8	66.4374	49.767	10.5484	12.2215	99.89	DOWN_AtMSBc_UP_AtC32IBc	UP
AT3G25780	37.2245	2.45116	0.642251	3.81652	0.000135348	0.00153062	104	43	11	9	88.5832	36.8962	9.66936	13.7491	99.85	DOWN_AtMSBc_UP_AtC32IBc	UP
AT4G12490	22.5672	3.01239	0.794307	3.79248	0.000149151	0.00165094	39	55	6	3	33.2187	47.1928	5.2742	4.58305	99.83	DOWN_AtMSBc_UP_AtC32IBc	UP
AT2G25470	9.61691	6.49559	1.73449	3.74496	0.000180422	0.00191704	23	22	0	0	19.5905	18.8771	0	0	99.81	DOWN_AtMSBc_UP_AtC32IBc	UP
AT4G36240	38.3421	2.1727	0.582922	3.72725	0.000193579	0.00203385	92	55	16	9	78.362	47.1928	14.0645	13.7491	99.8	DOWN_AtMSBc_UP_AtC32IBc	UP
AT4G02330	45.2052	2.1445	0.584495	3.66898	0.000243516	0.00244732	106	65	10	17	90.2867	55.7734	8.79033	25.9706	99.76	DOWN_AtMSBc_UP_AtC32IBc	UP
AT3G28220	863.558	2.70337	0.738112	3.66254	0.000249726	0.00249495	2624	885	252	156	2235.02	759.376	221.516	238.318	99.75	DOWN_AtMSBc_UP_AtC32IBc	UP
AT4G16880	42.8189	2.0847	0.57152	3.64765	0.000264652	0.00262499	60	103	24	7	51.1057	88.3793	21.0968	10.6938	99.74	DOWN_AtMSBc_UP_AtC32IBc	UP
AT1G52400	5899.59	2.00167	0.549249	3.64438	0.000268036	0.00265142	15204	6914	2457	1673	12950.2	5932.57	2159.78	2555.81	99.73	DOWN_AtMSBc_UP_AtC32IBc	UP
AT2G40435	26.7015	2.51011	0.689238	3.64187	0.000270667	0.00267353	55	51	8	6	46.8469	43.7606	7.03226	9.1661	99.73	DOWN_AtMSBc_UP_AtC32IBc	UP
AT1G33760	47.9963	2.09909	0.592108	3.54512	0.000392441	0.00362954	48	133	16	15	40.8845	114.121	14.0645	22.9152	99.64	DOWN_AtMSBc_UP_AtC32IBc	UP
AT4G24570	662.993	2.17981	0.621798	3.50565	0.000455496	0.00411029	731	1806	252	169	622.637	1549.64	221.516	258.178	99.59	DOWN_AtMSBc_UP_AtC32IBc	UP
AT5G10625	34.2444	2.07094	0.591299	3.50235	0.000461171	0.00414359	66	63	13	10	56.2162	54.0573	11.4274	15.2768	99.59	DOWN_AtMSBc_UP_AtC32IBc	UP
AT5G14700	32.5032	2.18534	0.626458	3.48841	0.000485902	0.00432854	72	52	10	10	61.3268	44.6187	8.79033	15.2768	99.57	DOWN_AtMSBc_UP_AtC32IBc	UP
AT2G24850	40.9334	2.47242	0.737018	3.35463	0.000794707	0.00652605	141	22	16	7	120.098	18.8771	14.0645	10.6938	99.35	DOWN_AtMSBc_UP_AtC32IBc	UP
AT3G48350	31.4617	2.03751	0.617945	3.29724	0.000976415	0.00776253	59	60	17	6	50.2539	51.4831	14.9436	9.1661	99.22	DOWN_AtMSBc_UP_AtC32IBc	UP
AT4G12500	12.5709	3.81931	1.17711	3.24464	0.00117598	0.00897322	31	24	2	1	26.4046	20.5932	1.75807	1.52768	99.1	DOWN_AtMSBc_UP_AtC32IBc	UP
AT5G50800	14.6276	3.45607	1.06645	3.24073	0.00119225	0.00907254	24	38	1	3	20.4423	32.606	0.879033	4.58305	99.09	DOWN_AtMSBc_UP_AtC32IBc	UP
AT3G44860	74.1152	3.45935	1.06769	3.24005	0.00119509	0.00908998	254	65	19	5	216.347	55.7734	16.7016	7.63841	99.09	DOWN_AtMSBc_UP_AtC32IBc	UP
AT4G03070	31.1436	2.08471	0.645352	3.23034	0.00123642	0.00933211	55	64	19	4	46.8469	54.9153	16.7016	6.11073	99.07	DOWN_AtMSBc_UP_AtC32IBc	UP
AT3G16470	1185.51	2.06126	0.638905	3.22625	0.00125425	0.00944107	3242	1240	511	306	2761.41	1063.98	449.186	467.471	99.06	DOWN_AtMSBc_UP_AtC32IBc	UP
AT3G25110	21.8907	2.36657	0.748191	3.16305	0.00156125	0.0113135	40	46	9	4	34.0704	39.4704	7.91129	6.11073	98.87	DOWN_AtMSBc_UP_AtC32IBc	UP
AT1G10640	16.2925	3.0631	0.978429	3.13063	0.00174432	0.0123664	30	39	7	0	25.5528	33.464	6.15323	0	98.76	DOWN_AtMSBc_UP_AtC32IBc	UP
AT4G11320	172.73	2.67744	0.85555	3.1295	0.00175104	0.0123931	539	161	44	36	459.099	138.146	38.6774	54.9966	98.76	DOWN_AtMSBc_UP_AtC32IBc	UP
AT5G11590	16.1245	2.82891	0.909935	3.10891	0.00187776	0.0131122	37	29	4	3	31.5152	24.8835	3.51613	4.58305	98.69	DOWN_AtMSBc_UP_AtC32IBc	UP
AT3G44450	14.4665	2.94872	0.96781	3.04679	0.00231298	0.0155136	30	30	4	2	25.5528	25.7416	3.51613	3.05537	98.45	DOWN_AtMSBc_UP_AtC32IBc	UP
AT3G52740	17.252	2.63301	0.874008	3.01258	0.0025904	0.0168618	42	28	7	2	35.774	24.0255	6.15323	3.05537	98.31	DOWN_AtMSBc_UP_AtC32IBc	UP
AT3G62780	15.01	2.85224	0.96739	2.94839	0.00319433	0.0199532	27	34	2	4	22.9976	29.1738	1.75807	6.11073	98	DOWN_AtMSBc_UP_AtC32IBc	UP
AT2G45220	18.5004	2.38549	0.815116	2.92656	0.00342728	0.0210618	40	33	8	3	34.0704	28.3157	7.03226	4.58305	97.89	DOWN_AtMSBc_UP_AtC32IBc	UP
AT2G30750	19.7794	2.41569	0.835857	2.89008	0.00385148	0.0230166	45	32	3	7	38.3293	27.4577	2.6371	10.6938	97.7	DOWN_AtMSBc_UP_AtC32IBc	UP
AT5G64080	16.0884	2.56275	0.888513	2.88431	0.00392274	0.0233838	30	34	4	4	25.5528	29.1738	3.51613	6.11073	97.66	DOWN_AtMSBc_UP_AtC32IBc	UP
AT5G06510	16.516	2.70218	0.952659	2.83646	0.00456167	0.0263554	31	37	9	0	26.4046	31.7479	7.91129	0	97.36	DOWN_AtMSBc_UP_AtC32IBc	UP
AT3G01550	18.0174	2.28532	0.819385	2.78907	0.00528602	0.0296681	41	29	7	4	34.9222	24.8835	6.15323	6.11073	97.03	DOWN_AtMSBc_UP_AtC32IBc	UP
AT5G24420	153.624	2.52665	0.906362	2.78768	0.00530869	0.0297653	485	129	58	26	413.104	110.689	50.9839	39.7197	97.02	DOWN_AtMSBc_UP_AtC32IBc	UP
AT4G08870	378.199	2.11883	0.806079	2.62857	0.00857455	0.0427397	1103	338	145	102	939.493	290.022	127.46	155.824	95.73	DOWN_AtMSBc_UP_AtC32IBc	UP

## Sheet: AtMSBc-vs-AtC32IBc-DOWN
	baseMean	log2FoldChange	lfcSE	stat	pvalue	padj	AtC32IBc_1	AtC32IBc_2	AtMSBc_1	AtMSBc_2	AtC32IBc_1.1	AtC32IBc_2.1	AtMSBc_1.1	AtMSBc_2.1	Certeza	DE	Regulation_Type
AT1G20970	2302.78	-2.6616	0.210864	-12.6224	1.58917e-36	1.3272e-32	901	570	3985	2914	767.437	489.09	3502.95	4451.67	100	UP_AtMSBc_DOWN_AtC32IBc	DOWN
AT4G36520	939.657	-2.53967	0.21915	-11.5887	4.70304e-31	2.61849e-27	389	256	1607	1175	331.335	219.661	1412.61	1795.03	100	UP_AtMSBc_DOWN_AtC32IBc	DOWN
AT1G15940	396.318	-2.30888	0.22708	-10.1677	2.7638e-24	6.59482e-21	172	139	686	469	146.503	119.269	603.016	716.483	100	UP_AtMSBc_DOWN_AtC32IBc	DOWN
AT1G75310	372.004	-2.55798	0.252379	-10.1355	3.84493e-24	8.02774e-21	138	114	591	493	117.543	97.8179	519.508	753.148	100	UP_AtMSBc_DOWN_AtC32IBc	DOWN
AT3G05900	3603.08	-2.22182	0.220649	-10.0695	7.53703e-24	1.39879e-20	1875	1103	5871	4391	1597.05	946.431	5160.8	6708.05	100	UP_AtMSBc_DOWN_AtC32IBc	DOWN
AT2G41990	576.313	-2.1062	0.213206	-9.8787	5.14946e-23	8.60114e-20	212	296	1068	610	180.573	253.983	938.807	931.886	100	UP_AtMSBc_DOWN_AtC32IBc	DOWN
AT5G41790	1825.6	-2.23109	0.226149	-9.86557	5.86973e-23	8.91291e-20	913	587	2776	2344	777.658	503.676	2440.19	3580.89	100	UP_AtMSBc_DOWN_AtC32IBc	DOWN
AT5G16730	860.31	-2.04279	0.218464	-9.3507	8.70683e-21	5.81721e-18	426	359	1259	1089	362.85	308.041	1106.7	1663.65	100	UP_AtMSBc_DOWN_AtC32IBc	DOWN
AT4G31570	435.48	-2.05796	0.22369	-9.20005	3.57785e-20	2.29849e-17	218	176	714	509	185.684	151.017	627.629	777.59	100	UP_AtMSBc_DOWN_AtC32IBc	DOWN
AT1G35115	384.617	-2.34864	0.277362	-8.46778	2.5011e-17	9.71533e-15	189	106	612	490	160.983	90.9535	537.968	748.564	100	UP_AtMSBc_DOWN_AtC32IBc	DOWN
AT1G68790	463.649	-2.0812	0.252587	-8.23953	1.72883e-16	5.15655e-14	247	167	696	582	210.385	143.295	611.807	889.111	100	UP_AtMSBc_DOWN_AtC32IBc	DOWN
AT2G33435	217.875	-2.16804	0.274168	-7.9077	2.62183e-15	6.08229e-13	98	87	351	265	83.4726	74.6505	308.54	404.836	100	UP_AtMSBc_DOWN_AtC32IBc	DOWN
AT1G24793	137.76	-2.46573	0.372419	-6.62086	3.57121e-11	2.99748e-09	70	29	277	146	59.6233	24.8835	243.492	223.042	100	UP_AtMSBc_DOWN_AtC32IBc	DOWN
AT1G10340	194.827	-2.07355	0.342116	-6.06096	1.35312e-09	7.60982e-08	91	85	486	132	77.5103	72.9344	427.21	201.654	100	UP_AtMSBc_DOWN_AtC32IBc	DOWN
AT5G40450	13755.6	-2.76533	0.49771	-5.5561	2.75865e-08	1.09448e-06	5063	3196	20083	19843	4312.47	2742.33	17653.6	30313.8	100	UP_AtMSBc_DOWN_AtC32IBc	DOWN
AT1G35112	75.6145	-2.95522	0.537241	-5.50073	3.78216e-08	1.42282e-06	15	25	74	133	12.7764	21.4513	65.0484	203.182	100	UP_AtMSBc_DOWN_AtC32IBc	DOWN
AT5G28320	72.9381	-2.11167	0.42966	-4.91475	8.88955e-07	2.19324e-05	41	23	122	85	34.9222	19.7352	107.242	129.853	100	UP_AtMSBc_DOWN_AtC32IBc	DOWN
AT5G28400	73.5681	-2.0913	0.431439	-4.84726	1.25181e-06	2.91212e-05	36	29	103	97	30.6634	24.8835	90.5404	148.185	100	UP_AtMSBc_DOWN_AtC32IBc	DOWN
AT4G08115	48.845	-2.56098	0.547786	-4.67515	2.93733e-06	5.9832e-05	24	9	79	64	20.4423	7.72247	69.4436	97.7717	99.99	UP_AtMSBc_DOWN_AtC32IBc	DOWN
AT3G27170	62.0952	-2.27259	0.488168	-4.65534	3.23439e-06	6.51677e-05	36	14	128	61	30.6634	12.0127	112.516	93.1886	99.99	UP_AtMSBc_DOWN_AtC32IBc	DOWN
AT1G58889	37.737	-2.52527	0.573094	-4.40638	1.05113e-05	0.000176559	11	15	63	48	9.36937	12.8708	55.3791	73.3288	99.98	UP_AtMSBc_DOWN_AtC32IBc	DOWN
AT3G25010	70.7134	-2.10339	0.484519	-4.34119	1.4171e-05	0.000229359	26	37	184	44	22.1458	31.7479	161.742	67.218	99.98	UP_AtMSBc_DOWN_AtC32IBc	DOWN
AT4G25070	32.6483	-2.65964	0.618952	-4.29701	1.73117e-05	0.000274083	10	11	76	30	8.51761	9.43857	66.8065	45.8305	99.97	UP_AtMSBc_DOWN_AtC32IBc	DOWN
AT5G45520	19.3865	-4.08019	0.961269	-4.24459	2.18995e-05	0.000335277	2	3	26	33	1.70352	2.57416	22.8549	50.4135	99.97	UP_AtMSBc_DOWN_AtC32IBc	DOWN
AT5G40340	1436.79	-2.13407	0.518707	-4.11421	3.88514e-05	0.000545782	852	397	2692	1515	725.7	340.647	2366.36	2314.44	99.95	UP_AtMSBc_DOWN_AtC32IBc	DOWN
AT5G64000	48.4553	-2.42667	0.619734	-3.91566	9.01585e-05	0.00109204	20	16	149	21	17.0352	13.7288	130.976	32.0813	99.89	UP_AtMSBc_DOWN_AtC32IBc	DOWN
AT1G76780	23.6651	-3.15713	0.811901	-3.88857	0.000100836	0.00119962	6	5	24	42	5.11057	4.29026	21.0968	64.1627	99.88	UP_AtMSBc_DOWN_AtC32IBc	DOWN
AT1G33960	31.5799	-2.4636	0.710532	-3.46726	0.000525784	0.00463439	11	12	97	14	9.36937	10.2966	85.2662	21.3876	99.54	UP_AtMSBc_DOWN_AtC32IBc	DOWN
AT5G27220	24.6348	-2.41523	0.738404	-3.27088	0.00107213	0.00833304	5	13	32	36	4.25881	11.1547	28.129	54.9966	99.17	UP_AtMSBc_DOWN_AtC32IBc	DOWN
AT2G15800	24.5685	-2.15697	0.691518	-3.11918	0.00181354	0.0127553	14	7	41	29	11.9247	6.00636	36.0403	44.3028	98.72	UP_AtMSBc_DOWN_AtC32IBc	DOWN
AT1G35710	900.798	-2.13334	0.708001	-3.01319	0.00258515	0.0168474	444	339	2462	504	378.182	290.88	2164.18	769.952	98.32	UP_AtMSBc_DOWN_AtC32IBc	DOWN
AT1G65910	14.0239	-2.83649	0.956238	-2.9663	0.00301411	0.0190339	2	6	23	19	1.70352	5.14831	20.2178	29.026	98.1	UP_AtMSBc_DOWN_AtC32IBc	DOWN
AT4G33170	20.4781	-2.0081	0.730359	-2.74947	0.00596914	0.0324044	10	9	33	24	8.51761	7.72247	29.0081	36.6644	96.76	UP_AtMSBc_DOWN_AtC32IBc	DOWN

## Sheet: AtMSC32I-AtC32IBc-UP
	baseMean	log2FoldChange	lfcSE	stat	pvalue	padj	AtC32I_1	AtC32I_2	AtC32IBc_1	AtC32IBc_2	AtC32I_1.1	AtC32I_2.1	AtC32IBc_1.1	AtC32IBc_2.1	Certeza	DE	Regulation_Type
AT1G25145	107.635	10.1749	1.5146	6.71789	1.84371e-11	8.19916e-09	0	0	318	126	0	0	307.813	122.728	100	DOWN_AtC32I_UP_AtC32IBc	UP
AT2G30362	25.7528	8.11138	1.58876	5.10548	3.29955e-07	5.86938e-05	0	0	39	67	0	0	37.7507	65.2603	99.99	DOWN_AtC32I_UP_AtC32IBc	UP
AT3G33166	15.5345	7.38225	1.65353	4.46454	8.02394e-06	0.00083188	0	0	33	31	0	0	31.9429	30.1951	99.92	DOWN_AtC32I_UP_AtC32IBc	UP
AT4G38820	47.4423	2.22743	0.539807	4.12635	3.68565e-05	0.00270799	17	16	76	85	16.1964	17.2143	73.5655	82.7929	99.73	DOWN_AtC32I_UP_AtC32IBc	UP
AT5G62165	71.5419	2.12991	0.638903	3.3337	0.00085698	0.0272504	11	40	184	56	10.48	43.0357	178.106	54.5459	97.27	DOWN_AtC32I_UP_AtC32IBc	UP

## Sheet: AtMSC32I-AtC32IBc-DOWN
	baseMean	log2FoldChange	lfcSE	stat	pvalue	padj	AtC32I_1	AtC32I_2	AtC32IBc_1	AtC32IBc_2	AtC32I_1.1	AtC32I_2.1	AtC32IBc_1.1	AtC32IBc_2.1	Certeza	DE	Regulation_Type
AT3G22231	4749.08	-3.30798	0.283487	-11.6689	1.83789e-31	3.10585e-27	10684	6576	690	1103	10179	7075.08	667.897	1074.36	100	UP_AtC32I_DOWN_AtC32IBc	DOWN
AT3G19710	1189.81	-3.25826	0.297083	-10.9675	5.47529e-28	4.62635e-24	2866	1467	256	208	2730.52	1578.34	247.8	202.599	100	UP_AtC32I_DOWN_AtC32IBc	DOWN
AT5G03350	564.93	-4.3615	0.414297	-10.5275	6.45488e-26	3.63603e-22	1696	501	54	54	1615.83	539.023	52.2702	52.5979	100	UP_AtC32I_DOWN_AtC32IBc	DOWN
AT2G14560	1984.69	-3.28892	0.330215	-9.95994	2.28209e-23	9.64126e-20	4177	2995	230	528	3979.55	3222.3	222.632	514.29	100	UP_AtC32I_DOWN_AtC32IBc	DOWN
AT4G23810	898.438	-2.42155	0.250579	-9.66383	4.29486e-22	1.45158e-18	1644	1359	258	324	1566.29	1462.14	249.735	315.587	100	UP_AtC32I_DOWN_AtC32IBc	DOWN
AT1G16410	829.346	-3.72788	0.388489	-9.59583	8.3246e-22	1.75847e-18	2324	809	153	87	2214.15	870.398	148.099	84.741	100	UP_AtC32I_DOWN_AtC32IBc	DOWN
AT1G78370	569.515	-2.58603	0.269444	-9.59767	8.17684e-22	1.75847e-18	1153	794	165	170	1098.5	854.26	159.715	165.586	100	UP_AtC32I_DOWN_AtC32IBc	DOWN
AT3G58990	582.648	-3.03505	0.315514	-9.61937	6.6237e-22	1.75847e-18	1384	705	118	143	1318.58	758.505	114.22	139.287	100	UP_AtC32I_DOWN_AtC32IBc	DOWN
AT1G24147	404.569	-2.95818	0.309203	-9.56713	1.09916e-21	2.06386e-18	886	548	82	108	844.119	589.59	79.3733	105.196	100	UP_AtC32I_DOWN_AtC32IBc	DOWN
AT3G22235	4339.47	-2.31523	0.264026	-8.76893	1.80369e-18	3.04805e-15	8281	6101	1171	1818	7889.56	6564.03	1133.49	1770.79	100	UP_AtC32I_DOWN_AtC32IBc	DOWN
AT5G19240	1223.78	-2.34248	0.269853	-8.68058	3.93768e-18	6.04936e-15	2469	1614	350	480	2352.29	1736.49	338.788	467.537	100	UP_AtC32I_DOWN_AtC32IBc	DOWN
AT1G62560	171.812	-3.43342	0.397508	-8.63736	5.75294e-18	8.10158e-15	414	218	28	32	394.43	234.545	27.1031	31.1691	100	UP_AtC32I_DOWN_AtC32IBc	DOWN
AT3G16670	767.63	-2.23271	0.268403	-8.31848	8.9097e-17	1.15819e-13	1536	993	301	254	1463.39	1068.36	291.358	247.405	100	UP_AtC32I_DOWN_AtC32IBc	DOWN
AT3G02020	591.097	-2.8487	0.348424	-8.17594	2.93577e-16	3.54368e-13	1497	604	161	136	1426.24	649.84	155.843	132.469	100	UP_AtC32I_DOWN_AtC32IBc	DOWN
AT4G13770	3655.84	-2.13259	0.264436	-8.06466	7.34374e-16	8.27346e-13	6982	4885	1114	1681	6651.96	5255.74	1078.32	1637.35	100	UP_AtC32I_DOWN_AtC32IBc	DOWN
AT2G43100	267.018	-2.77841	0.34641	-8.02059	1.05242e-15	1.11155e-12	617	320	68	72	587.835	344.286	65.8218	70.1305	100	UP_AtC32I_DOWN_AtC32IBc	DOWN
AT5G64310	524.121	-2.33423	0.307396	-7.59355	3.1126e-14	3.09411e-11	890	838	128	229	847.93	901.599	123.9	223.054	100	UP_AtC32I_DOWN_AtC32IBc	DOWN
AT4G03060	109.179	-3.35806	0.444498	-7.55474	4.19712e-14	3.9404e-11	255	144	20	20	242.946	154.929	19.3593	19.4807	100	UP_AtC32I_DOWN_AtC32IBc	DOWN
AT2G46650	515.746	-2.10421	0.279742	-7.52199	5.39507e-14	4.79849e-11	1026	647	199	202	977.501	696.103	192.625	196.755	100	UP_AtC32I_DOWN_AtC32IBc	DOWN
AT5G14200	733.161	-2.52953	0.339108	-7.45935	8.69487e-14	7.34673e-11	1806	724	223	223	1720.63	778.947	215.857	217.21	100	UP_AtC32I_DOWN_AtC32IBc	DOWN
AT1G66090	379.537	-2.04437	0.278259	-7.34699	2.02725e-13	1.55721e-10	649	561	137	168	618.322	603.576	132.611	163.638	100	UP_AtC32I_DOWN_AtC32IBc	DOWN
AT1G31580	34170.7	-2.19099	0.303191	-7.22644	4.95828e-13	3.3516e-10	79472	33843	13054	12238	75715.4	36411.5	12635.8	11920.2	100	UP_AtC32I_DOWN_AtC32IBc	DOWN
AT4G12030	283.431	-2.79667	0.39184	-7.13729	9.51905e-13	5.74509e-10	733	272	75	72	698.351	292.643	72.5975	70.1305	100	UP_AtC32I_DOWN_AtC32IBc	DOWN
AT1G19960	429.903	-2.25785	0.318941	-7.07922	1.44964e-12	8.44741e-10	761	648	107	199	725.028	697.179	103.572	193.833	100	UP_AtC32I_DOWN_AtC32IBc	DOWN
AT2G40750	385.368	-2.41841	0.346097	-6.98767	2.79483e-12	1.47593e-09	796	502	84	166	758.373	540.099	81.3092	161.69	100	UP_AtC32I_DOWN_AtC32IBc	DOWN
AT5G52050	232.22	-2.51845	0.360308	-6.98971	2.75462e-12	1.47593e-09	375	403	48	94	357.274	433.585	46.4624	91.5593	100	UP_AtC32I_DOWN_AtC32IBc	DOWN
AT1G65490	180.53	-2.33589	0.335057	-6.97163	3.13299e-12	1.60438e-09	339	260	65	58	322.976	279.732	62.9179	56.494	100	UP_AtC32I_DOWN_AtC32IBc	DOWN
AT5G07030	240.858	-2.31519	0.340265	-6.80407	1.01703e-11	4.7741e-09	493	309	67	99	469.696	332.451	64.8538	96.4294	100	UP_AtC32I_DOWN_AtC32IBc	DOWN
AT2G30766	203.603	-2.15249	0.318825	-6.75134	1.46481e-11	6.69023e-09	332	324	80	74	316.306	348.59	77.4374	72.0786	100	UP_AtC32I_DOWN_AtC32IBc	DOWN
AT5G45340	552.732	-2.01602	0.300967	-6.69848	2.10595e-11	9.12525e-09	912	840	165	286	868.89	903.751	159.715	278.574	100	UP_AtC32I_DOWN_AtC32IBc	DOWN
AT5G54610	123.371	-2.98571	0.447865	-6.66654	2.6191e-11	1.10651e-08	304	138	23	34	289.63	148.473	22.2632	33.1172	100	UP_AtC32I_DOWN_AtC32IBc	DOWN
AT2G33580	218.861	-2.07484	0.311994	-6.65026	2.92577e-11	1.20592e-08	388	314	91	82	369.659	337.831	88.085	79.8708	100	UP_AtC32I_DOWN_AtC32IBc	DOWN
AT1G65860	136.059	-2.83251	0.426389	-6.64301	3.07335e-11	1.23659e-08	310	169	24	45	295.346	181.826	23.2312	43.8316	100	UP_AtC32I_DOWN_AtC32IBc	DOWN
AT5G01100	196.769	-2.22193	0.338316	-6.5676	5.11332e-11	2.00954e-08	284	351	70	73	270.575	377.639	67.7577	71.1045	100	UP_AtC32I_DOWN_AtC32IBc	DOWN
AT1G24793	184.297	-2.73822	0.427761	-6.40128	1.54083e-10	5.66053e-08	245	379	70	29	233.419	407.764	67.7577	28.247	100	UP_AtC32I_DOWN_AtC32IBc	DOWN
AT5G24150	163.204	-2.48489	0.39349	-6.31499	2.70181e-10	9.71444e-08	378	180	54	48	360.132	193.661	52.2702	46.7537	100	UP_AtC32I_DOWN_AtC32IBc	DOWN
AT5G44568	176.899	-2.50961	0.405638	-6.18683	6.13862e-10	2.16118e-07	416	191	67	42	396.336	205.496	64.8538	40.9095	100	UP_AtC32I_DOWN_AtC32IBc	DOWN
AT1G78410	150.811	-2.19997	0.3565	-6.17102	6.78517e-10	2.24829e-07	258	232	47	64	245.804	249.607	45.4944	62.3382	100	UP_AtC32I_DOWN_AtC32IBc	DOWN
AT3G26960	93.6992	-2.68282	0.435941	-6.15408	7.55152e-10	2.4541e-07	180	142	20	32	171.491	152.777	19.3593	31.1691	100	UP_AtC32I_DOWN_AtC32IBc	DOWN
AT1G10585	46.242	-4.93957	0.828602	-5.96134	2.50184e-09	7.41729e-07	48	124	3	3	45.7311	133.411	2.9039	2.9221	100	UP_AtC32I_DOWN_AtC32IBc	DOWN
AT5G67450	71.6725	-3.20025	0.536702	-5.96281	2.4794e-09	7.41729e-07	181	80	12	17	172.444	86.0715	11.6156	16.5586	100	UP_AtC32I_DOWN_AtC32IBc	DOWN
AT3G03190	56.2075	-3.32667	0.572342	-5.81238	6.1591e-09	1.65211e-06	131	74	8	13	124.808	79.6161	7.74374	12.6625	100	UP_AtC32I_DOWN_AtC32IBc	DOWN
AT5G07690	129.239	-2.67923	0.465732	-5.75272	8.78197e-09	2.31885e-06	336	118	41	31	320.117	126.955	39.6866	30.1951	100	UP_AtC32I_DOWN_AtC32IBc	DOWN
AT1G28480	68.4234	-2.77241	0.488579	-5.67444	1.39143e-08	3.56269e-06	123	113	22	14	117.186	121.576	21.2953	13.6365	100	UP_AtC32I_DOWN_AtC32IBc	DOWN
AT4G34410	58.8735	-3.05677	0.571108	-5.35235	8.68189e-08	1.88096e-05	119	90	6	20	113.375	96.8304	5.8078	19.4807	100	UP_AtC32I_DOWN_AtC32IBc	DOWN
AT5G60900	94.0294	-2.42063	0.459362	-5.26955	1.36755e-07	2.88878e-05	214	105	25	36	203.884	112.969	24.1992	35.0652	100	UP_AtC32I_DOWN_AtC32IBc	DOWN
AT5G05960	100.413	-2.10445	0.407437	-5.16508	2.40337e-07	4.61529e-05	167	155	32	46	159.106	166.764	30.9749	44.8056	100	UP_AtC32I_DOWN_AtC32IBc	DOWN
AT5G52760	66.5147	-2.50596	0.485832	-5.15807	2.49511e-07	4.73763e-05	120	104	16	25	114.328	111.893	15.4875	24.3509	100	UP_AtC32I_DOWN_AtC32IBc	DOWN
AT4G29610	136.9	-2.19372	0.431596	-5.08282	3.7188e-07	6.41022e-05	186	253	31	70	177.208	272.201	30.007	68.1824	99.99	UP_AtC32I_DOWN_AtC32IBc	DOWN
AT5G50580	20.8695	-7.87066	1.61672	-4.8683	1.12565e-06	0.000161206	56	28	0	0	53.3529	30.125	0	0	99.98	UP_AtC32I_DOWN_AtC32IBc	DOWN
AT4G20970	28.7101	-3.60066	0.770098	-4.67559	2.93115e-06	0.000372433	47	57	5	4	44.7783	61.3259	4.83983	3.89614	99.96	UP_AtC32I_DOWN_AtC32IBc	DOWN
AT2G35710	79.1081	-2.06239	0.443659	-4.64859	3.3421e-06	0.000415281	155	100	32	31	147.673	107.589	30.9749	30.1951	99.96	UP_AtC32I_DOWN_AtC32IBc	DOWN
AT1G12610	27.1006	-3.69313	0.810517	-4.55651	5.20104e-06	0.000589882	39	59	4	4	37.1565	63.4777	3.87187	3.89614	99.94	UP_AtC32I_DOWN_AtC32IBc	DOWN
AT3G22740	72.4883	-2.08556	0.46443	-4.49057	7.10331e-06	0.000754961	139	95	34	23	132.43	102.21	32.9109	22.4028	99.92	UP_AtC32I_DOWN_AtC32IBc	DOWN
AT4G25490	83.8899	-2.30631	0.523805	-4.40299	1.06771e-05	0.001053	83	186	21	37	79.0766	200.116	20.3273	36.0393	99.89	UP_AtC32I_DOWN_AtC32IBc	DOWN
AT4G22470	116.948	-2.22479	0.507254	-4.38595	1.1548e-05	0.0011088	164	213	68	17	156.248	229.165	65.8218	16.5586	99.89	UP_AtC32I_DOWN_AtC32IBc	DOWN
AT2G14610	92.5483	-2.82666	0.64694	-4.36928	1.24658e-05	0.00117111	47	260	16	31	44.7783	279.732	15.4875	30.1951	99.88	UP_AtC32I_DOWN_AtC32IBc	DOWN
AT1G61340	33.04	-3.24012	0.745568	-4.34584	1.38744e-05	0.00127425	34	81	7	6	32.3928	87.1474	6.77577	5.84421	99.87	UP_AtC32I_DOWN_AtC32IBc	DOWN
AT3G48650	94.1258	-2.15997	0.500801	-4.31302	1.61038e-05	0.00144754	237	76	36	35	225.797	81.7679	34.8468	34.0912	99.86	UP_AtC32I_DOWN_AtC32IBc	DOWN
AT3G44990	55.483	-2.36924	0.553446	-4.28088	1.86157e-05	0.00159688	80	102	11	26	76.2184	109.741	10.6476	25.3249	99.84	UP_AtC32I_DOWN_AtC32IBc	DOWN
AT3G11340	19.3729	-4.24541	1.01825	-4.16934	3.05489e-05	0.00233595	40	33	3	1	38.1092	35.5045	2.9039	0.974035	99.77	UP_AtC32I_DOWN_AtC32IBc	DOWN
AT4G36010	64.8073	-2.19259	0.537386	-4.08011	4.50148e-05	0.00323704	125	87	36	12	119.091	93.6028	34.8468	11.6884	99.68	UP_AtC32I_DOWN_AtC32IBc	DOWN
AT3G01830	52.9488	-2.28809	0.571773	-4.00175	6.2876e-05	0.00419977	75	97	10	27	71.4548	104.362	9.67967	26.2989	99.58	UP_AtC32I_DOWN_AtC32IBc	DOWN
AT5G22570	17.1331	-4.49418	1.12302	-4.00187	6.2845e-05	0.00419977	35	30	2	1	33.3456	32.2768	1.93593	0.974035	99.58	UP_AtC32I_DOWN_AtC32IBc	DOWN
AT4G03450	50.4555	-2.20899	0.555623	-3.9757	7.01726e-05	0.00453981	112	55	16	21	106.706	59.1742	15.4875	20.4547	99.55	UP_AtC32I_DOWN_AtC32IBc	DOWN
AT4G14450	35.404	-2.49391	0.630604	-3.95479	7.66017e-05	0.00481224	63	56	14	8	60.022	60.25	13.5515	7.79228	99.52	UP_AtC32I_DOWN_AtC32IBc	DOWN
AT3G23120	69.2931	-2.20151	0.558912	-3.93892	8.1848e-05	0.00508614	170	61	16	35	161.964	65.6295	15.4875	34.0912	99.49	UP_AtC32I_DOWN_AtC32IBc	DOWN
AT5G26690	19.4128	-3.62447	0.923559	-3.92446	8.69232e-05	0.00532216	37	34	4	2	35.251	36.5804	3.87187	1.94807	99.47	UP_AtC32I_DOWN_AtC32IBc	DOWN
AT2G38240	190.997	-4.01212	1.04213	-3.84994	0.000118148	0.00663411	265	434	38	8	252.474	466.938	36.7827	7.79228	99.34	UP_AtC32I_DOWN_AtC32IBc	DOWN
AT2G44840	42.8233	-2.28476	0.594552	-3.84283	0.000121624	0.00678325	69	71	9	21	65.7384	76.3885	8.7117	20.4547	99.32	UP_AtC32I_DOWN_AtC32IBc	DOWN
AT2G29500	39.6106	-2.9215	0.763247	-3.82773	0.000129331	0.00711908	25	108	13	6	23.8183	116.197	12.5836	5.84421	99.29	UP_AtC32I_DOWN_AtC32IBc	DOWN
AT5G21960	42.1073	-2.25543	0.589383	-3.82677	0.000129835	0.00712364	66	71	10	20	62.8802	76.3885	9.67967	19.4807	99.29	UP_AtC32I_DOWN_AtC32IBc	DOWN
AT3G02840	53.3269	-2.12016	0.560632	-3.78172	0.000155746	0.00825063	68	101	13	28	64.7857	108.665	12.5836	27.273	99.17	UP_AtC32I_DOWN_AtC32IBc	DOWN
AT1G01560	51.0576	-2.13718	0.565729	-3.77774	0.000158258	0.00830625	117	51	16	23	111.469	54.8706	15.4875	22.4028	99.17	UP_AtC32I_DOWN_AtC32IBc	DOWN
AT2G27660	24.3512	-2.88176	0.770624	-3.73951	0.000184379	0.00944186	55	31	6	6	52.4002	33.3527	5.8078	5.84421	99.06	UP_AtC32I_DOWN_AtC32IBc	DOWN
AT2G37430	36.5938	-2.19609	0.600619	-3.65637	0.000255807	0.0117955	64	55	12	15	60.9747	59.1742	11.6156	14.6105	98.82	UP_AtC32I_DOWN_AtC32IBc	DOWN
AT5G22380	18.0718	-3.26987	0.919882	-3.55466	0.000378472	0.0151967	36	29	5	2	34.2983	31.2009	4.83983	1.94807	98.48	UP_AtC32I_DOWN_AtC32IBc	DOWN
AT4G02850	38.5394	-2.10222	0.604986	-3.47482	0.000511189	0.0188666	77	48	11	19	73.3602	51.6429	10.6476	18.5067	98.11	UP_AtC32I_DOWN_AtC32IBc	DOWN
AT2G25460	37.7524	-2.12728	0.615169	-3.45804	0.000544118	0.0198169	68	54	20	9	64.7857	58.0983	19.3593	8.76631	98.02	UP_AtC32I_DOWN_AtC32IBc	DOWN
AT4G27654	30.8815	-2.4192	0.70027	-3.45467	0.000550971	0.0199376	46	56	5	15	43.8256	60.25	4.83983	14.6105	98.01	UP_AtC32I_DOWN_AtC32IBc	DOWN
AT5G24660	24.3499	-2.39673	0.735708	-3.25772	0.0011231	0.0328916	43	38	6	10	40.9674	40.884	5.8078	9.74035	96.71	UP_AtC32I_DOWN_AtC32IBc	DOWN
AT5G12110	24.3402	-2.39862	0.741379	-3.23534	0.00121496	0.0346528	52	30	7	9	49.542	32.2768	6.77577	8.76631	96.53	UP_AtC32I_DOWN_AtC32IBc	DOWN
AT4G15680	29.6262	-2.1063	0.653508	-3.22306	0.00126828	0.0354847	49	46	12	11	46.6838	49.4911	11.6156	10.7144	96.45	UP_AtC32I_DOWN_AtC32IBc	DOWN
