# Supplementary material for: Amphibian skin bacteria display antifungal activity and induce plant defense mechanisms against Botrytis cinerea
Source: Front Plant Sci. 2024 Apr 9;15:1392637. doi: 10.3389/fpls.2024.1392637 (PMC11035788; doi:10.3389/fpls.2024.1392637)
Supplement: Supplementary Data Sheet 3 — Gene Ontology [GO] term enrichment list of differentially expressed genes associated to . [file Table_3.xlsx]

## Sheet: Hoja1
GO functional enrichment analysis of the DEGs at the three conditions of interaction with A. thaliana.
		B. cinerea condition
	Term GO	GO biological process	DEGs	fold Enrichment	P-value	Treatment
1	GO:0044281	small molecule metabolic process	1	1.48	0.512	Bc
2	GO:0009611	response to wounding	1	4.86	0.189	Bc
3	GO:0006950	response to stress	1	0.8	1	Bc
4	GO:0050896	response to stimulus	2	0.94	1	Bc
5	GO:0009753	response to jasmonic acid	0	0.01	1	Bc
6	GO:0009620	response to fungus	0	0.01	1	Bc
7	GO:0009605	response to external stimulus	0	0.01	1	Bc
8	GO:0009719	response to endogenous stimulus	2	3.33	0.115	Bc
9	GO:0042221	response to chemical	2	1.72	0.329	Bc
10	GO:0009607	response to biotic stimulus	0	0.01	1	Bc
11	GO:0036211	protein modification process	1	1.44	0.522	Bc
12	GO:0043412	macromolecule modification	1	1.17	0.601	Bc
13	GO:0006629	lipid metabolic process	1	3.11	0.282	Bc
14	GO:0042430	indole-containing compound metabolic process	0	0.01	1	Bc
15	GO:0042435	indole-containing compound biosynthetic process	0	0.01	1	Bc
16	GO:1901657	glycosyl compound metabolic process	0	0.01	1	Bc
17	GO:0080119	ER body organization	0	0.01	1	Bc
18	GO:0019752	carboxylic acid metabolic process	1	2.93	0.296	Bc
19	GO:0005975	carbohydrate metabolic process	1	4.47	0.204	Bc
20	GO:0044419	biological process involved in interspecies interaction between organisms	0	0.01	1	Bc
21	GO:0006576	biogenic amine metabolic process	0	0.01	1	Bc
22	GO:0009308	amine metabolic process	0	0.01	1	Bc
		C32I condition
23	GO:0044281	small molecule metabolic process	37	1.44	0.0267	C32I
24	GO:0009611	response to wounding	30	3.84	5.33e-10	C32I
25	GO:0006950	response to stress	103	2.16	5.25e-16	C32I
26	GO:0050896	response to stimulus	144	1.78	3.87e-17	C32I
27	GO:0009753	response to jasmonic acid	20	3.58	1.4e-06	C32I
28	GO:0009620	response to fungus	29	2.95	2.8e-07	C32I
29	GO:0009605	response to external stimulus	61	2.3	5.96e-10	C32I
30	GO:0009719	response to endogenous stimulus	54	2.36	2.8e-09	C32I
31	GO:0042221	response to chemical	92	2.09	3.91e-13	C32I
32	GO:0009607	response to biotic stimulus	53	2.38	3.65e-09	C32I
33	GO:0036211	protein modification process	11	0.42	0.000764	C32I
34	GO:0043412	macromolecule modification	14	0.43	0.000179	C32I
35	GO:0006629	lipid metabolic process	10	0.82	0.657	C32I
36	GO:0042430	indole-containing compound metabolic process	2	1.27	0.673	C32I
37	GO:0042435	indole-containing compound biosynthetic process	2	2.01	0.266	C32I
38	GO:1901657	glycosyl compound metabolic process	14	5.33	7.11e-07	C32I
39	GO:0080119	ER body organization	0	0.01	1	C32I
40	GO:0019752	carboxylic acid metabolic process	19	1.47	0.0859	C32I
41	GO:0005975	carbohydrate metabolic process	7	0.82	0.727	C32I
42	GO:0044419	biological process involved in interspecies interaction between organisms	53	2.37	3.91e-09	C32I
43	GO:0006576	biogenic amine metabolic process	2	1.36	0.661	C32I
44	GO:0009308	amine metabolic process	3	1.55	0.449	C32I
		B. cinerea - C32I condition
45	GO:0044281	small molecule metabolic process (GO:0044281)	24	2.92	8.37e-07	BcC32I
46	GO:0009611	response to wounding (GO:0009611)	13	5.2	1.2e-06	BcC32I
47	GO:0006950	response to stress (GO:0006950)	36	2.35	1.08e-07	BcC32I
48	GO:0050896	response to stimulus (GO:0050896)	53	2.04	1.4e-10	BcC32I
49	GO:0009753	response to jasmonic acid (GO:0009753)	12	6.7	2.37e-07	BcC32I
50	GO:0009620	response to fungus (GO:0009620)	17	5.4	1.17e-08	BcC32I
51	GO:0009605	response to external stimulus (GO:0009605)	25	2.94	3.8e-07	BcC32I
52	GO:0009719	response to endogenous stimulus (GO:0009719)	20	2.74	2.36e-05	BcC32I
53	GO:0042221	response to chemical (GO:0042221)	30	2.12	1.9e-05	BcC32I
54	GO:0009607	response to biotic stimulus (GO:0009607)	21	2.95	4.31e-06	BcC32I
55	GO:0036211	protein modification process (GO:0036211)	0	0.01	0.000291	BcC32I
56	GO:0043412	macromolecule modification (GO:0043412)	0	0.01	2.68e-05	BcC32I
57	GO:0006629	lipid metabolic process (GO:0006629)	13	3.32	0.000131	BcC32I
58	GO:0042430	indole-containing compound metabolic process (GO:0042430)	5	9.94	0.000169	BcC32I
59	GO:0042435	indole-containing compound biosynthetic process (GO:0042435)	4	12.53	0.000337	BcC32I
60	GO:1901657	glycosyl compound metabolic process (GO:1901657)	6	7.14	0.000216	BcC32I
61	GO:0080119	ER body organization (GO:0080119)	2	100	0.000192	BcC32I
62	GO:0019752	carboxylic acid metabolic process (GO:0019752)	15	3.62	1.35e-05	BcC32I
63	GO:0005975	carbohydrate metabolic process (GO:0005975)	11	4.04	8.45e-05	BcC32I
64	GO:0044419	biological process involved in interspecies interaction between organisms (GO:0044419)	21	2.94	4.59e-06	BcC32I
65	GO:0006576	biogenic amine metabolic process (GO:0006576)	5	10.62	0.000125	BcC32I
66	GO:0009308	amine metabolic process (GO:0009308)	6	9.68	4.23e-05	BcC32I
